# Supplementary material for: The sensitivity of PM 2.5 acidity to meteorological parameters and chemical composition changes: 10-year records from six Canadian monitoring sites
Source: Copernicus journal article supplement (doi:10.5194/acp-19-9309-2019), 2019-07-19
Supplement: Supplementary file 1 [file pH sensitivity eastern Canada_supplementary information.pdf › pH Canada paper supplementary/pH sensitivity eastern Canada_supplementary information.pdf]

**Supplementary information for “Evaluation of PM<sub>2.5</sub> acidity sensitivity to meteorological parameters and chemical composition changes: results from 10-year records of six Canadian monitoring sites”**

Ye Tao<sup>1</sup>, Jennifer G. Murphy<sup>2</sup>

<sup>1</sup>Department of Physical and Environmental Sciences, University of Toronto Scarborough, Toronto, ON, M1C 1A4, Canada

<sup>2</sup>Department of Chemistry, University of Toronto, Toronto, ON, M5S 3H6, Canada

*Corresponding to:* Jennifer G. Murphy ([jmurphy@chem.utoronto.ca](mailto:jmurphy@chem.utoronto.ca))

Table S1. Detail information of the chosen six monitoring sites.

| NAPS site | Locations          | NAPS station code | Year                 |
|-----------|--------------------|-------------------|----------------------|
| Toronto*  | 43.658°N, 79.397°W | 60427             | 2007-2013            |
|           | 43.659°N, 79.395°W | 60439             | 2014-2016            |
| Simcoe    | 42.857°N, 80.270°W | 62601             | 2007-2016            |
| Windsor   | 42.293°N, 83.073°W | 60211             | 2007-2010, 2012-2016 |
| Ottawa    | 45.434°N, 75.676°W | 60104             | 2007-2016            |
| Montreal  | 45.652°N, 73.574°W | 50129             | 2009-2016            |
| St Anicet | 45.121°N, 74.288°W | 54401             | 2007-2016            |

\*The two sites in Toronto were located in the same region and were only 400 meters apart. During 2014-Jan-20 and 2014-May-26, simultaneous sampling was performed in both sites. The comparisons of NH<sub>3</sub> and SNA concentrations in PM<sub>2.5</sub> were made in Figure S1. The observation results of these two sites are highly consistent with each other, so it is safe to merge the data from these two sites to get ten-year trends of aerosol chemistry in Toronto.

Table S2. Monthly average  $\pm$  standard deviation values of ambient temperature and relative humidity in each site from year 2007-2016.

|       | Ottawa         |             | Montreal       |             | Windsor        |             | Simcoe         |             | St Anicet      |             |
|-------|----------------|-------------|----------------|-------------|----------------|-------------|----------------|-------------|----------------|-------------|
| Month | T (°C)         | RH(%)       | T(°C)          | RH(%)       | T(°C)          | RH(%)       | T(°C)          | RH(%)       | T(°C)          | RH(%)       |
| 1     | -8.7 $\pm$ 5.8 | 80 $\pm$ 9  | -7.6 $\pm$ 6.5 | 74 $\pm$ 11 | -4.3 $\pm$ 5.2 | 74 $\pm$ 11 | -4.8 $\pm$ 6.5 | 79 $\pm$ 9  | -8.6 $\pm$ 6.5 | 81 $\pm$ 9  |
| 2     | -7.2 $\pm$ 5.9 | 74 $\pm$ 11 | -6.1 $\pm$ 6.5 | 70 $\pm$ 13 | -5.0 $\pm$ 5.5 | 73 $\pm$ 11 | -5.5 $\pm$ 6.3 | 78 $\pm$ 8  | -7.2 $\pm$ 6.1 | 76 $\pm$ 10 |
| 3     | -1.4 $\pm$ 6.3 | 66 $\pm$ 16 | -0.5 $\pm$ 5.9 | 62 $\pm$ 16 | 1.2 $\pm$ 5.3  | 71 $\pm$ 13 | -0.3 $\pm$ 5.1 | 76 $\pm$ 11 | -1.1 $\pm$ 6.8 | 71 $\pm$ 13 |
| 4     | 6.9 $\pm$ 4.7  | 60 $\pm$ 18 | 7.4 $\pm$ 4.6  | 56 $\pm$ 18 | 9.0 $\pm$ 4.5  | 62 $\pm$ 12 | 7.1 $\pm$ 4.4  | 69 $\pm$ 14 | 6.5 $\pm$ 4.7  | 67 $\pm$ 16 |
| 5     | 15.2 $\pm$ 4.5 | 64 $\pm$ 15 | 16.0 $\pm$ 5.0 | 58 $\pm$ 17 | 16.6 $\pm$ 4.6 | 64 $\pm$ 12 | 15.2 $\pm$ 4.7 | 65 $\pm$ 12 | 14.9 $\pm$ 4.4 | 67 $\pm$ 16 |
| 6     | 19.1 $\pm$ 3.2 | 71 $\pm$ 12 | 19.0 $\pm$ 3.5 | 65 $\pm$ 14 | 21.8 $\pm$ 3.5 | 65 $\pm$ 10 | 19.0 $\pm$ 3.6 | 67 $\pm$ 10 | 18.4 $\pm$ 3.1 | 75 $\pm$ 11 |
| 7     | 20.9 $\pm$ 2.9 | 71 $\pm$ 12 | 22.1 $\pm$ 3.0 | 66 $\pm$ 9  | 22.4 $\pm$ 3.0 | 69 $\pm$ 9  | 20.7 $\pm$ 3.1 | 71 $\pm$ 9  | 21.2 $\pm$ 2.9 | 75 $\pm$ 9  |
| 8     | 20.0 $\pm$ 2.9 | 74 $\pm$ 10 | 21.2 $\pm$ 2.6 | 69 $\pm$ 10 | 22.4 $\pm$ 2.8 | 73 $\pm$ 10 | 20.2 $\pm$ 2.8 | 75 $\pm$ 8  | 20.0 $\pm$ 3.1 | 79 $\pm$ 7  |
| 9     | 15.6 $\pm$ 4.1 | 76 $\pm$ 9  | 17.1 $\pm$ 4.2 | 69 $\pm$ 9  | 18.0 $\pm$ 3.9 | 73 $\pm$ 8  | 16.4 $\pm$ 4.0 | 76 $\pm$ 7  | 15.8 $\pm$ 4.3 | 81 $\pm$ 7  |
| 10    | 9.4 $\pm$ 4.4  | 78 $\pm$ 11 | 10.4 $\pm$ 4.4 | 71 $\pm$ 11 | 12.5 $\pm$ 4.8 | 72 $\pm$ 11 | 10.8 $\pm$ 4.8 | 78 $\pm$ 9  | 9.9 $\pm$ 4.5  | 79 $\pm$ 10 |
| 11    | 2.5 $\pm$ 5.2  | 78 $\pm$ 10 | 4.0 $\pm$ 4.6  | 71 $\pm$ 12 | 4.9 $\pm$ 4.8  | 72 $\pm$ 11 | 4.1 $\pm$ 5.5  | 78 $\pm$ 10 | 2.9 $\pm$ 5.2  | 78 $\pm$ 10 |
| 12    | -5.4 $\pm$ 6.3 | 82 $\pm$ 9  | -3.0 $\pm$ 6.1 | 77 $\pm$ 12 | 0.0 $\pm$ 4.5  | 79 $\pm$ 11 | -0.7 $\pm$ 4.6 | 81 $\pm$ 9  | -4.2 $\pm$ 6.3 | 82 $\pm$ 9  |

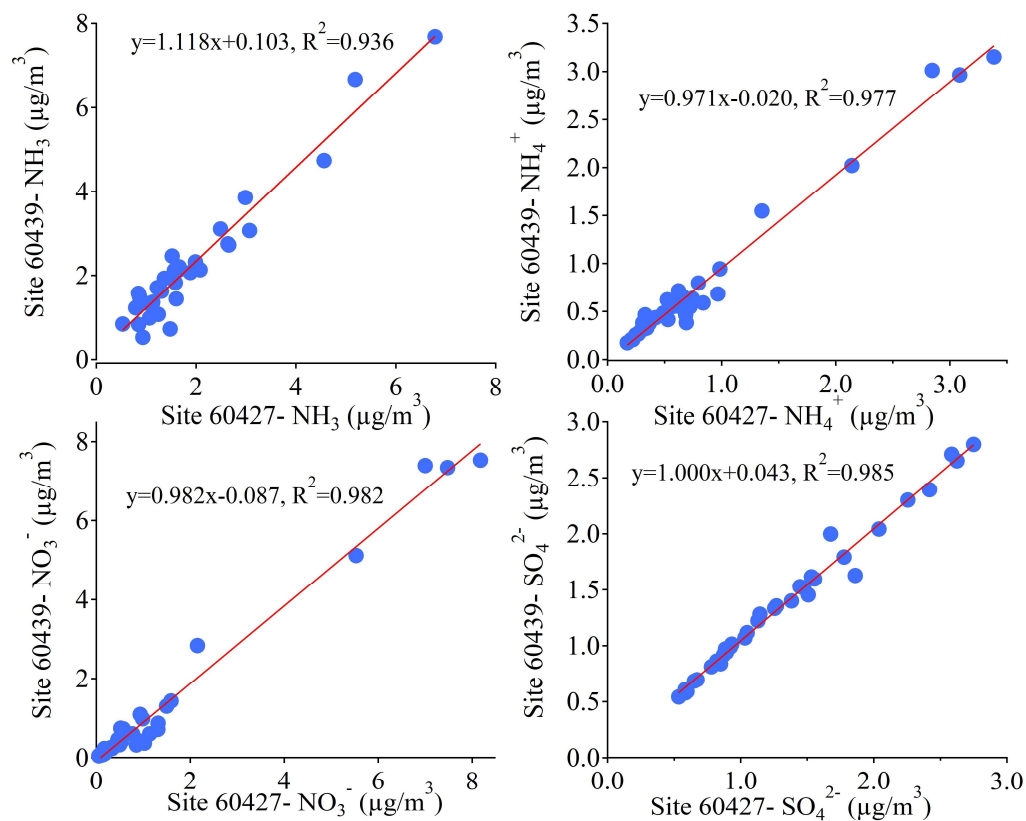

Figure S1. Linear regression results of  $\text{NH}_3$ ,  $\text{PM}_{2.5}$  ammonium, sulfate and nitrate concentrations measured in Toronto site 60439 and site 60427. High correlations and near utility slopes were found for all four linear regressions.

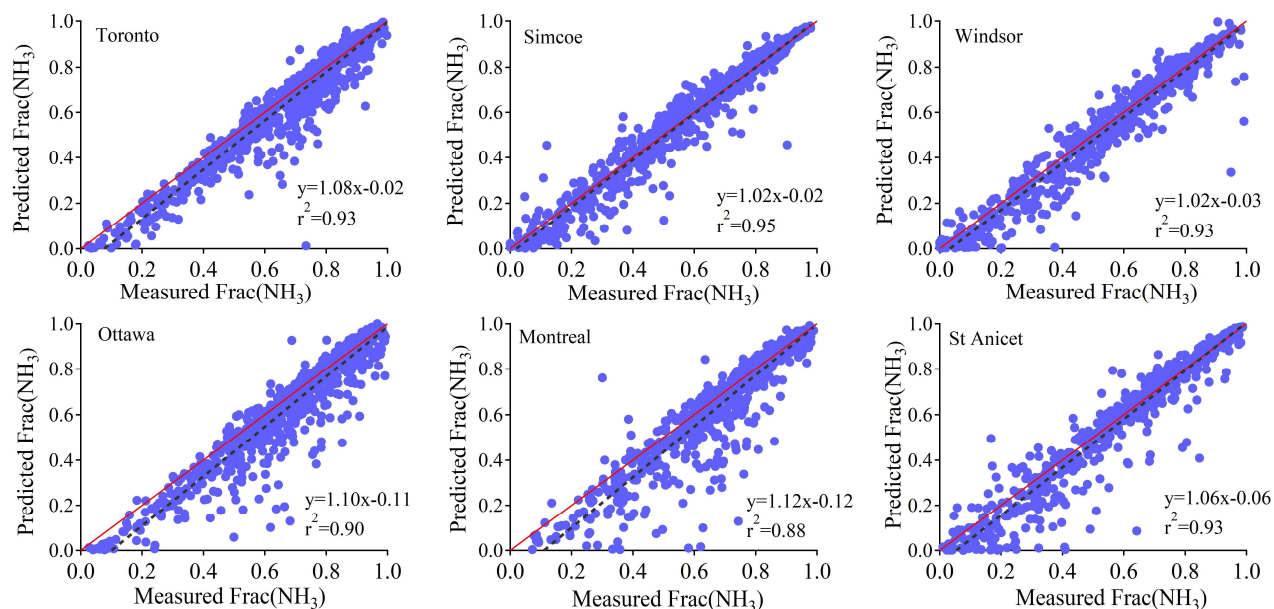

Figure S2. Comparison of measured and predicted gas fraction of  $\text{NH}_x$  in six sites. The red line in each graph represents 1:1 line. Linear regression results (dashed grey line) are also shown in each graph.

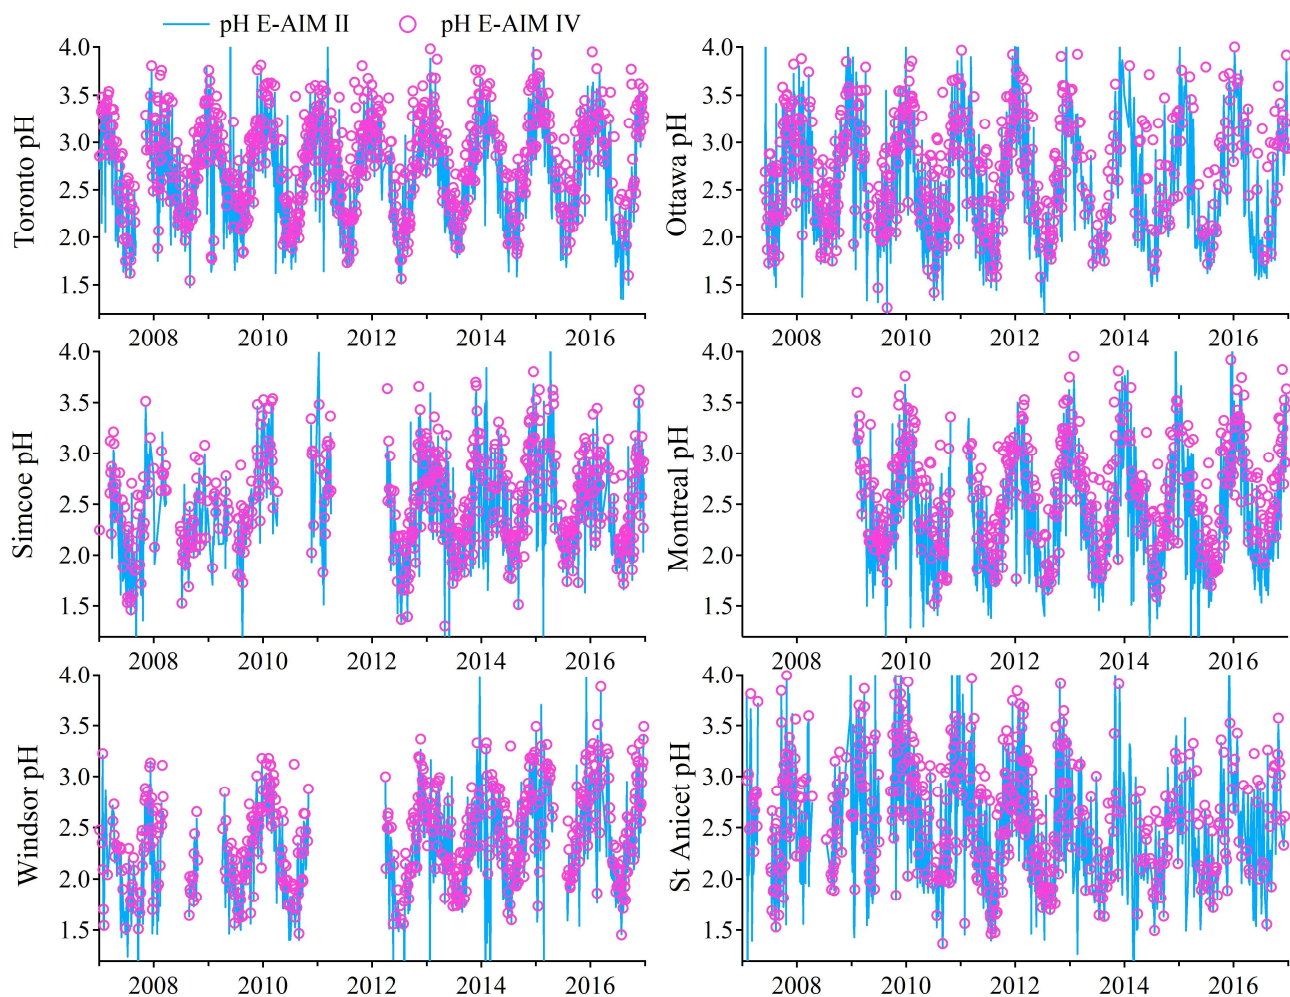

Figure S3. The comparison of aerosol pH calculated in E-AIM II model (blue solid line) and E-AIM IV model (purple open circle), showing that they both exhibit similar seasonal variation pattern.

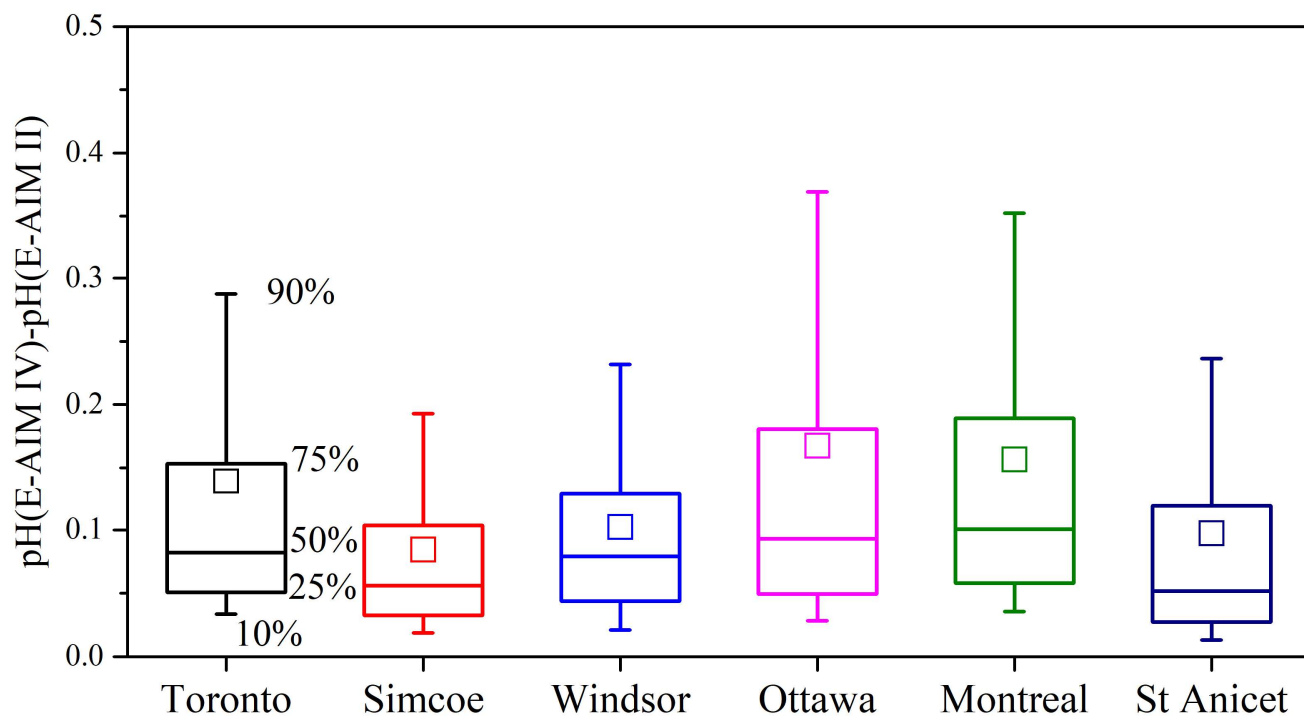

Figure S4. The box and whisker plot of aerosol pH different calculated in E-AIM IV model and E-AIM II model in six sites. In each box, the top, middle and bottom lines represent 75<sup>th</sup>, 50<sup>th</sup> and 25<sup>th</sup> percentile of statistical data, the upper and lower whiskers represent 90<sup>th</sup> and 10<sup>th</sup> percentile, and the square mark represent the mean value.

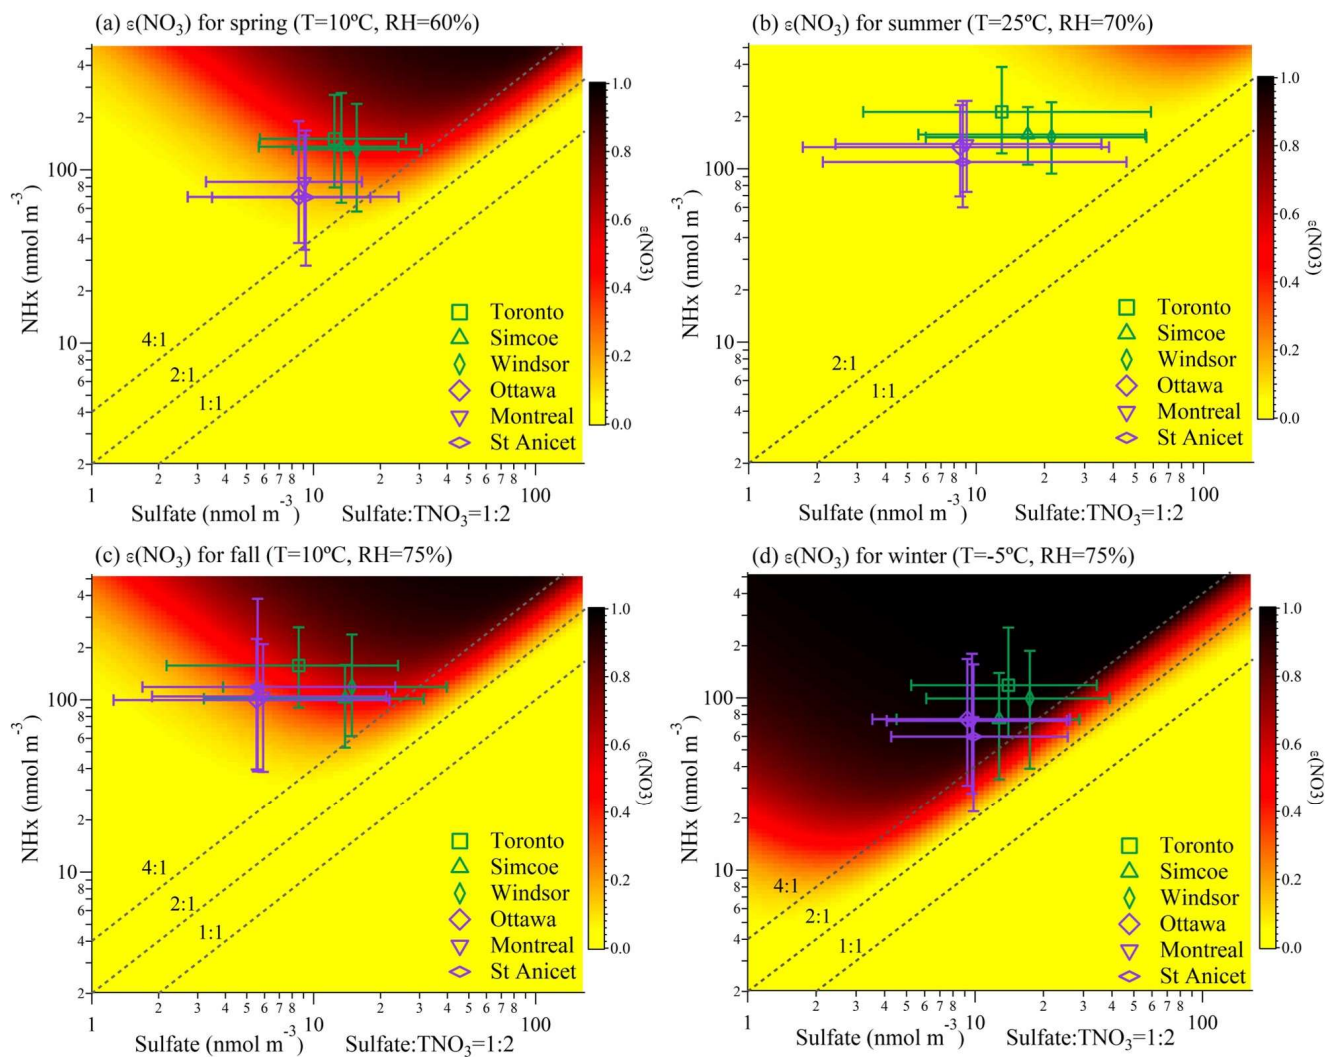

Figure S5. E-AIM modelling results of particle phase fraction of total nitrate,  $\epsilon(\text{NO}_3)=[\text{NO}_3^-]/([\text{HNO}_3(\text{g})]+[\text{NO}_3^-])$  in four seasons. All parameters are the same for the calculations shown in Figure 5.



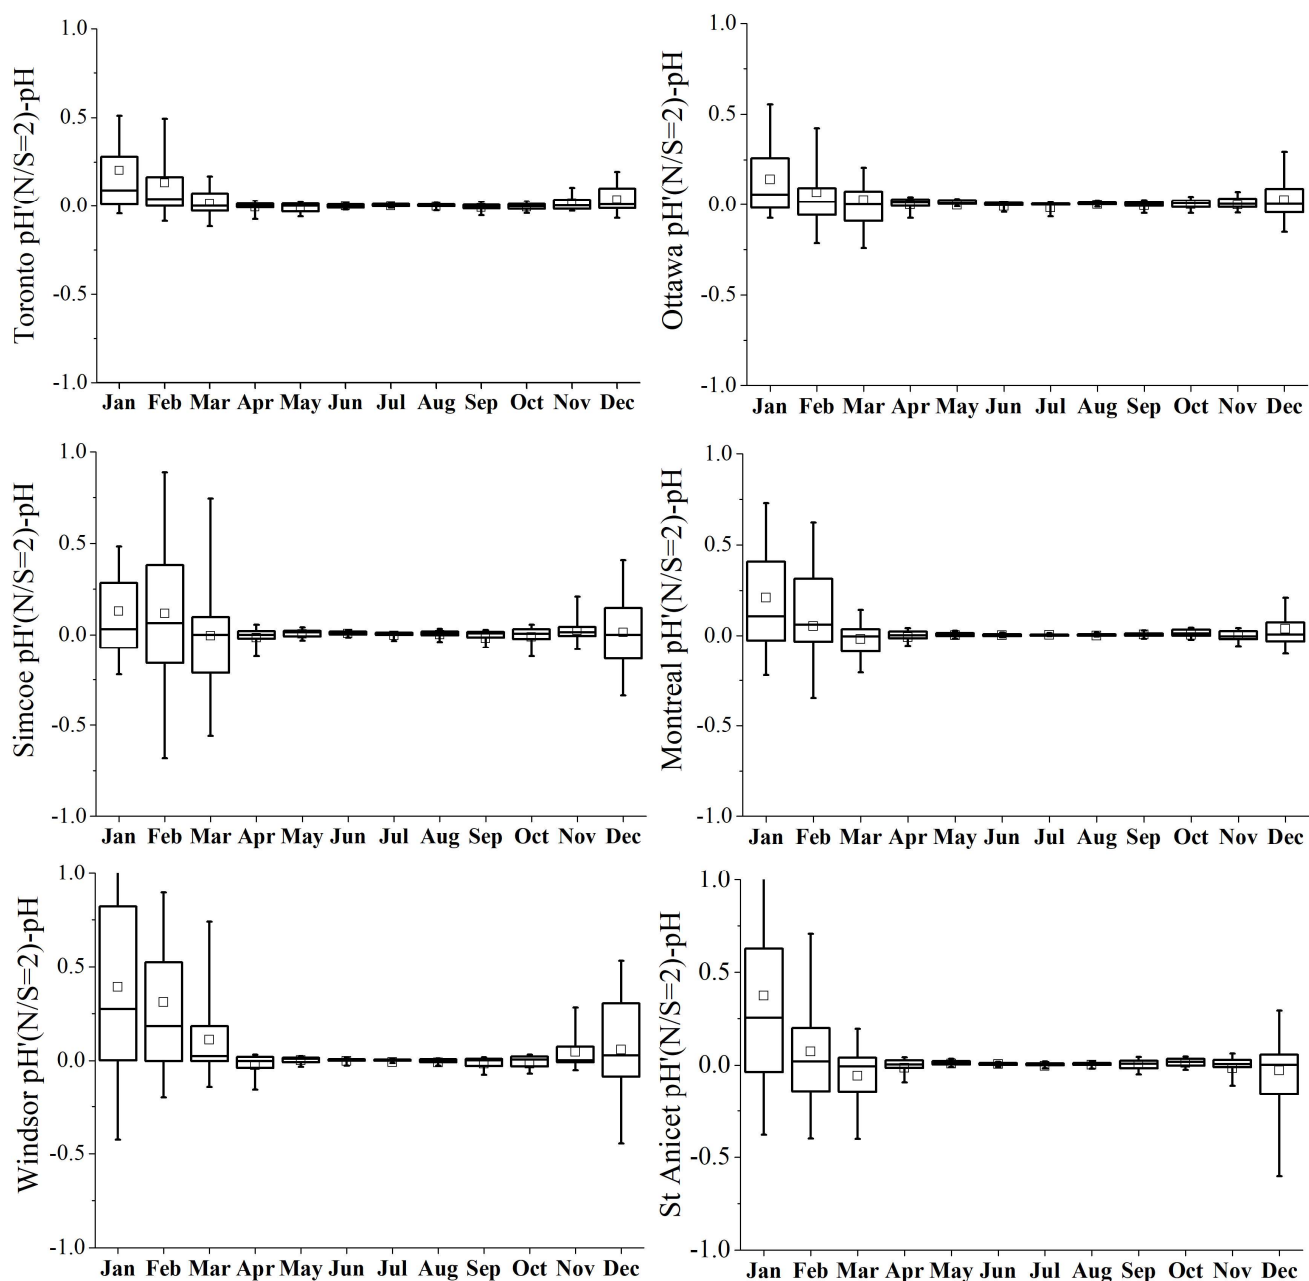

Figure S6. Box and whisker plots of the pH difference between the values calculated forcing  $\text{TNO}_3$  to sulfate molar ratio to be 2 and calculated using measured total nitrate concentration in each month in each sampling site. The boxes represent 25<sup>th</sup>, 50<sup>th</sup> and 75<sup>th</sup> percentile, the whiskers represent 10<sup>th</sup> and 90<sup>th</sup> percentile, and the square markers represent the mean values.

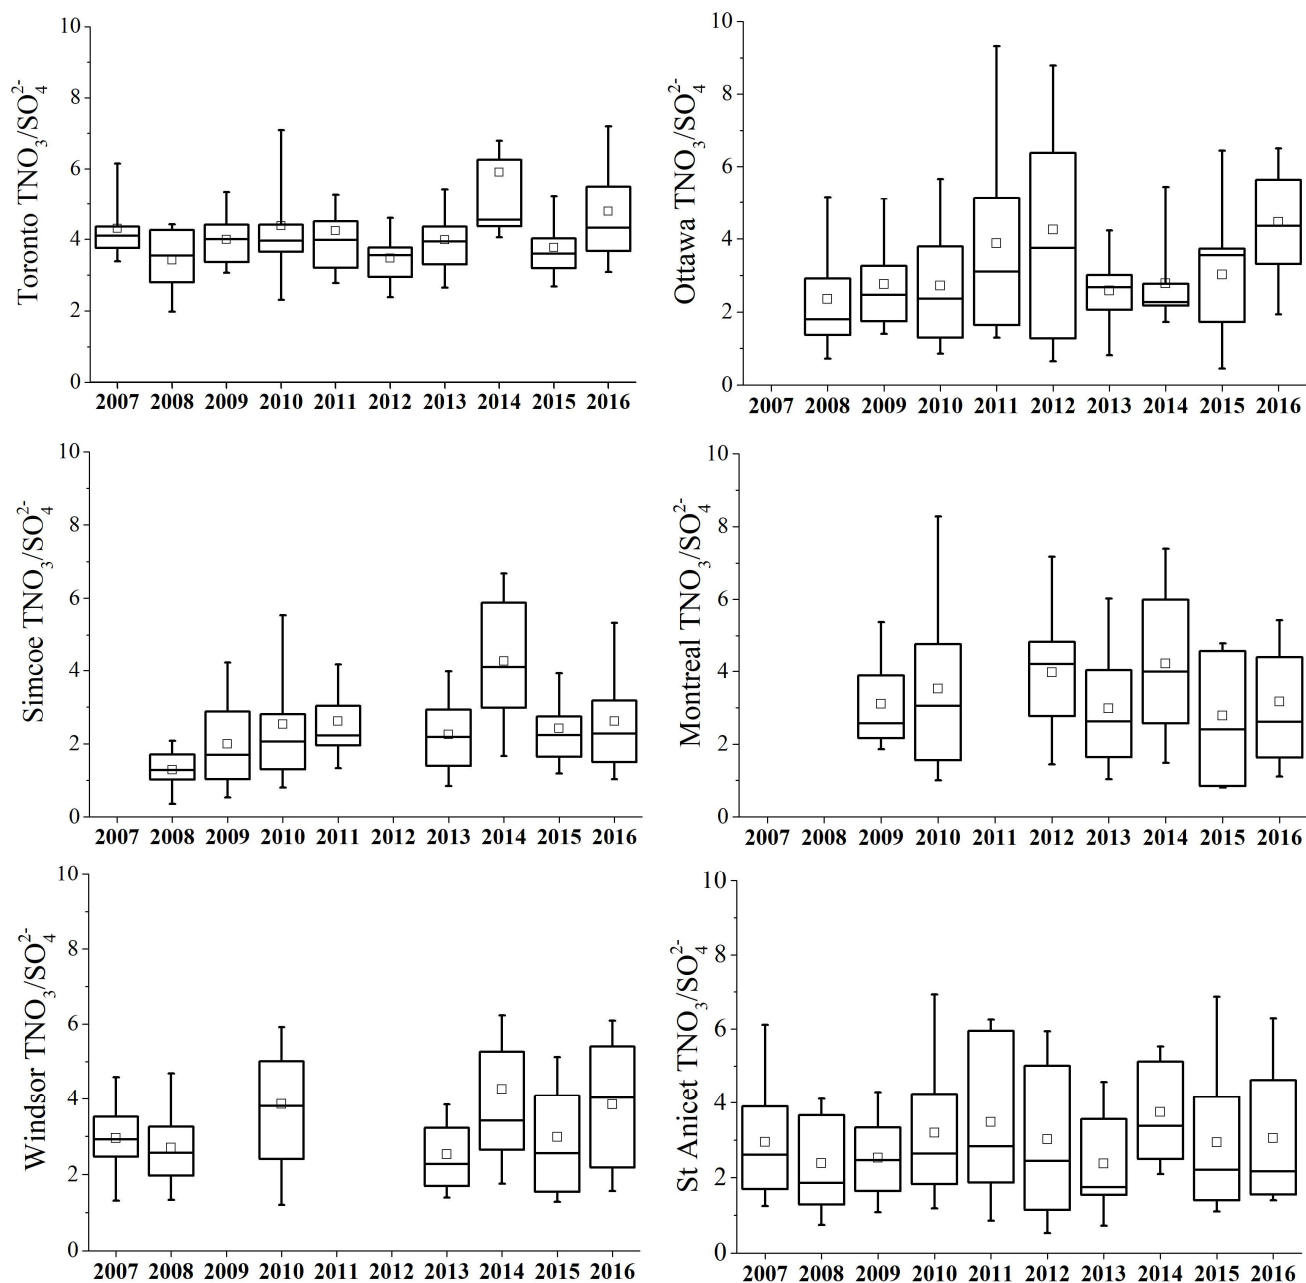

Figure S7. Box and whisker plots of  $\text{TNO}_3$  to sulfate molar ratio in each year in each sampling site. The boxes represent 25<sup>th</sup>, 50<sup>th</sup> and 75<sup>th</sup> percentile, the whiskers represent 10<sup>th</sup> and 90<sup>th</sup> percentile, and the square markers represent the mean values.
