# Supplementary material for: The sensitivity of PM 2.5 acidity to meteorological parameters and chemical composition changes: 10-year records from six Canadian monitoring sites
Source: Copernicus journal article supplement (doi:10.5194/acp-19-9309-2019), 2019-07-19
Supplement: Supplementary file 1 [file Supplement pH time series and composition profile data.xlsx]

## Sheet: Toronto
item	Date/Time	Temp (°C)	Rel Hum (%)	Stn Press (kPa)	NH3(g)	HNO3(g)	Na(p)	K(p)	Mg(p)	Ca(p)	Cl(p)	SO4(p)	NO3(p)	NH4(p)	pH_EAIM II	pH_EAIM IV	*All chemical compositions have the unit ug/m3
1	2007-01-03	4.7375	76.5	100.662	0.79018	0.0271107	0.0397398	0.141781	0.0140422	0.109664	0.0205486	1.72337	4.20742	1.74609	2.712	2.85324
2	2007-01-15	-2.74583	87.4583	100.082	0.696334	0.253296	0.0242154	0.0464781	0	0.00203467	0.0113166	0.454007	0.617382	0.331258	3.26258	3.32836
3	2007-01-18	-0.154167	74.5	100.975	0.355733	0.311921	0.320604	0.122219	0.022807	0.258578	0.458067	2.70749	5.10453	2.11699	2.15585	2.87472
4	2007-01-21	-6.39167	71.4583	101.176	0.947664	0.308915	0.121405	0.06466	0.00376365	0.0238999	0.108996	1.04107	1.27131	0.69686	3.32879	3.47893
5	2007-01-24	-4.54583	66.2917	100.208	0.99476	0.417289	0.21533	0.0574509	0.00277043	0.0410044	0.244499	1.21547	1.29337	0.779184	3.15204	3.37356
6	2007-01-27	-2.87083	95.25	98.9904	0.366388	0.155486	0.0236029	0.0822877	0	0	0.0542554	2.74788	4.10021	2.15187	3.20791	3.2962
7	2007-01-30	-7.38333	80.2917	99.8933	0.424349	0.205951	0.0740553	0.109094	0.00339032	0.0221286	0.311927	1.93188	8.24967	3.05996	3.18996	3.35247
8	2007-02-02	-3.54167	68.3333	99.0804	1.21672	0.329628	0.118153	0.0612833	0.00742789	0.0588623	0.0833729	3.78856	8.48364	3.32835	3.03095	3.16372
9	2007-02-05	-12.3125	72.75	100.615	0.489547	0.21872	0.13212	0.0265105	0.0264682	0.0487645	0.0707443	0.707463	0.640444	0.308554	3.28516
10	2007-02-08	-6.775	64.0417	99.9063	1.94569	0.411628	1.07674	0.0323479	0.0331594	0.189369	1.42011	0.939724	1.70005	0.529909	3.57092
11	2007-02-11	-6.60417	65.7083	100.583	0.515489	0.193435	0.590733	0.0897244	0.0336994	0.294964	0.802126	2.45721	7.58542	2.51331	2.0514	3.40378
12	2007-02-14	-12.7167	78.125	100.173	0.51889	0.284235	0.159397	0.0233413	0.0268968	0.0250457	0.0796995	0.476691	0.433269	0.161574	3.42616
13	2007-02-17	-6.85	69.9167	99.35	0.87947	0.224437	0.181277	0.0901703	0.025554	0.0582222	0.317513	3.97644	15.1131	5.44368	3.1331	3.36712
14	2007-02-20	3.49583	72.4583	99.0383	1.47155	0.357702	0.0638219	0.097476	0.00645424	0.050183	0.11231	3.22368	8.36906	3.20653	2.8736	2.94496
15	2007-02-23	-8.3875	62.4583	101.041	0.643795	0.342347	0.15163	0.0210017	0.00927594	0.0541659	0.219062	0.632917	0.3881	0.295963	3.10193	3.43281
16	2007-03-01	-2.09583	80.6667	100.225	1.28694	0.721756	0.0891343	0.0290027	0.00703546	0.0699063	0.151211	0.477712	1.75596	0.620402	3.3656	3.50384
17	2007-03-04	-1.43636	65.5455	99.5068	0.695693	0.339195	0.157196	0.0187922	0.00502455	0.0370173	0.125467	0.732383	0.501442	0.403308	2.78357	3.03858
18	2007-03-07	-8.72917	67.5	101.233	0.837466	0.399003	0.163182	0.033243	0.0107972	0.0533544	0.0241546	1.44101	2.67532	1.16598	3.3233	3.53829
19	2007-03-10	3.8	83.5	100.148	0.829823	0.599578	0.0695078	0.0996462	0.006971	0.0461525	0.0829862	6.52011	12.808	6.01545	2.76856	2.86326
20	2007-03-13	8.97083	69.1667	99.9104	3.35595	0.904104	0.153876	0.084786	0.0278085	0.213431	0.123523	3.76478	7.56594	3.29773	2.94699	3.04452
21	2007-03-16	-3.35417	55.0417	101.204	0.941283	0.360849	0.191065	0.0260012	0.0290686	0.106193	0.174103	0.988756	0.370508	0.384525	2.82479
22	2007-03-19	0.5625	80.0833	100.327	1.31135	0.570156	0.0798735	0.0500141	0.00899727	0.0487917	0	3.3737	2.80618	1.96482	3.10206	3.17666
23	2007-03-22	8.5375	80.5417	99.9908	2.3318	0.416977	0.0583346	0.0719339	0.00954738	0.0616406	0	4.33994	2.96959	2.44545	2.9364	2.98358
24	2007-03-25	2.40417	95.5	101.611	0.931445	0.940472	0.0178822	0.0392679	0.00256015	0.0211921	0.0136906	2.38579	3.45323	1.87436	3.30909	3.35313
25	2007-03-28	6.15417	50.2917	101.846	1.7824	0.504166	0.0364751	0.0218106	0.0138635	0.188091	0	0.743947	0.333106	0.388092	2.56446
26	2007-03-31	4.2625	40.7917	101.158	1.25115	0.293204	0.0799281	0.0162892	0.0124654	0.051471	0.0127001	0.462199	0.249076	0.232526	2.34832
27	2007-04-03	6.75833	79.4583	100.251	2.51375	0.66067	0.0166793	0.0205184	0.0111828	0.0984821	0	1.24299	1.65678	0.934933	3.1067	3.17385
28	2007-04-06	-4.3125	65.375	99.5042	0.855688	0.0654311	0.190493	0.0184675	0.0261057	0.0306799	0.0833643	0.705204	0.239165	0.289987	2.98827	3.35084
29	2007-04-09	0.7	63.5	100.361	1.19663	0.148885	0.0588186	0.0177364	0.00832979	0.0356388	0.00891041	0.758636	0.493762	0.439474	2.88179	3.01402
30	2007-04-12	5.15909	92.7727	98.9227	1.39766	0.281528	0.037342	0.0274035	0.00340362	0.0269537	0	3.37938	2.69306	2.01721	3.24321	3.27922
31	2007-04-15	4.41667	79.0833	99.4887	1.16553	0.155308	0.0136303	0.02317	0.00181078	0.0229311	0	1.61749	0.598031	0.796974	2.82376	2.8584
32	2007-04-18	7.625	74.25	100.082	1.59469	0.357353	0.115835	0.0236521	0.014702	0.076568	0	1.03013	0.671187	0.518748	2.71619	2.89229
33	2007-04-21	16.0542	29.0417	100.899	2.97388	0.548891	0.0553519	0.0551793	0.0189646	0.176877	0	1.62348	0.470254	0.714139	1.96031
34	2007-04-24	10.7417	57.9167	100.577	1.85138	0.534349	0.0472942	0.0195901	0.0104283	0.102811	0	1.55282	1.29143	0.925585	2.42619
35	2007-04-27	11.7167	90.3333	99.1637	2.17627	0.213246	0.0201504	0.0335184	0.00567882	0.0483552	0.022053	4.85755	5.51054	3.25967	2.97718	3.00413
36	2007-04-30	13.55	49.1667	99.7942	2.46657	0.331421	0.0171411	0.0122024	0.00803437	0.0921018	0	0.482094	0.209195	0.252419	2.17979
37	2007-05-03	11.7375	30.6667	101.154	2.1525	0.102428	0.0233962	0.0206252	0.017548	0.128935	0	0.52272	0.232757	0.221975	2.04482
38	2007-05-06	10.4917	31.0417	101.913	1.31577	0.113268	0.0411808	0.0204128	0.00868872	0.0432553	0	0.479556	0.157705	0.197692	1.89497
39	2007-05-09	19.55	65.375	100.157	5.53945	0.647276	0.0373764	0.0759516	0.0275702	0.197947	0	9.88614	6.18641	4.51597	2.4366	2.48107
40	2007-05-12	11.6167	46.0833	100.706	1.54235	0.176274	0.0382664	0.0167671	0.00532936	0.0532858	0	0.511719	0.269636	0.282538	2.05615
41	2007-05-15	19.7625	68.375	99.3017	5.97522	1.17333	0.0369781	0.0422881	0.0178832	0.13913	0	4.41506	1.55689	1.90557	2.49544	2.54652
42	2007-05-18	10.8375	64.5	100.96	2.19246	0.690261	0.00965085	0.0380591	0.017032	0.119228	0	0.980988	1.73214	0.784919	2.63258	2.75054
43	2007-05-24	21.8833	61.0833	101.048	3.96	1.75129	0.0436897	0.0855693	0.0382692	0.244983	0	13.8209	4.98644	6.21237	2.13121	2.18463
44	2007-05-27	15.0583	82.875	100.233	3.52483	0.562607	0.0197481	0.0524222	0.0103228	0.0469017	0	2.72819	2.82429	1.74003	2.82476	2.8566
45	2007-05-30	21.1875	60.0417	100.713	5.59919	1.30421	0.064665	0.0882034	0.100168	0.536189	0	7.47065	2.30647	2.99084	2.26267	2.40301
46	2007-06-02	23.7083	71.3333	99.68	5.72766	2.72038	0.0667062	0.0807606	0.0238191	0.0998044	0.00365278	14.0789	5.32938	6.54724	2.3259	2.35177
47	2007-06-05	12.6042	82.5833	98.6083	2.71899	0.31304	0.00606205	0.0309087	0.0038033	0.0433348	0	1.63515	1.58384	1.0696	2.84903	2.88163
48	2007-06-08	22.3	72.6667	99.3713	3.36164	1.10803	0.0691372	0.125136	0.0180938	0.0888871	0	6.11646	0.67383	2.21341	2.10452	2.15729
49	2007-06-11	22.3042	46.6667	100.547	2.19198	1.49983	1.61202	0.0496886	0.0125729	0.132087	0	2.26755	0.342024	0.902854	1.63708
50	2007-06-14	20.7333	60.2917	100.516	2.52266	0.756292	0.0322582	0.0291037	0.00840732	0.0527142	0	1.83442	0.450635	0.737984	1.91532	1.97464
51	2007-06-17	24.1042	58.5417	99.935	2.61527	0.976264	0.0131506	0.051846	0.0111057	0.0876801	0	5.07546	0.556944	1.80728	1.71758
52	2007-06-20	18.7583	57.9167	100.19	2.28778	0.354162	0.00393525	0.0184213	0.00721034	0.0607121	0	0.368646	0.0937649	0.16282	1.93719
53	2007-06-23	17.3708	51.2917	100.24	1.57489	0.222184	0.0175979	0.0310437	0.00588896	0.0474957	0	0.60402	0.131517	0.29952	1.78988
54	2007-06-26	26.6917	66.375	100.66	2.92241	2.11044	0.054883	0.11913	0.0251676	0.167392	0	17.2896	2.14097	6.14906	1.70364	1.74919
55	2007-06-29	19.2917	51.5833	100.442	1.24263	0.489292	0.0219801	0.0338418	0.0114627	0.103783	0	0.683212	0.150463	0.273357	1.57938
56	2007-07-02	17.6208	60.75	101.082	1.14579	0.589848	0.0198865	0.185922	0.016686	0.040702	0	0.877765	0.227773	0.330323	1.72682	1.98735
57	2007-07-05	20.7375	85	99.6812	3.58158	0.591672	0.0253488	0.134816	0.015865	0.064779	0	8.22271	7.83366	5.0286	2.56814	2.597
58	2007-07-08	23.3125	78.0417	99.2663	5.68669	0.956121	0.0572613	0.150034	0.0230865	0.128243	0.00196443	6.61563	2.05985	3.01268	2.43711	2.48549
59	2007-07-11	22.4042	63	99.2329	2.82458	0.430122	0.0115194	0.0313369	0.0145332	0.113085	0	2.71568	0.539019	0.920085	1.88564	1.94874
60	2007-07-14	17.0458	78.0417	99.5012	3.55427	0.162461	0.0264036	0.059125	0.0124607	0.0908181	0	2.02775	0.791876	0.925639	2.54805	2.62422
61	2007-07-17	20.8167	74.7083	100.131	3.59536	1.14641	0.030835	0.0659293	0.0242529	0.171274	0	4.90856	3.66013	2.64616	2.36274	2.42287
62	2007-07-20	19.2042	65.7083	99.9333	1.96317	0.257611	0	0.00991609	0.00697449	0.0542158	0	0.199413	0.116573	0.0807157	1.93647	2.55782
63	2007-07-23	21.6208	60.0417	100.667	2.94862	0.796006	0.0285379	0.033408	0.0244365	0.239852	0.00609617	1.17991	0.37363	0.481829	1.93244	2.30063
64	2007-07-26	23.075	77.9167	100.263	0.978624	0.871297	0.0254015	0.0498023	0.016892	0.0844823	0.00326281	14.848	2.26517	5.37366	1.58159	1.62382
65	2007-07-29	23.4958	66.6667	100.124	1.94657	0.263832	0.0526702	0.055374	0.0196039	0.148872	0.0398242	1.87286	0.264379	0.640232	1.71415	1.87089
66	2007-08-01	27.7375	60.5833	100.1	2.88119	0.579959	0.0462545	0.0621233	0.0293515	0.216816	0.0172214	2.5408	0.227769	0.904048	1.60831	1.75701
67	2007-08-04	22.7208	51.6667	100.337	2.731	0.383861	0.00811525	0.105703	0.00875298	0.062385	0.001876	0.618009	0.0920032	0.232788	1.74133
68	2007-08-07	23.0333	83.0417	99.5392	3.11665	1.05768	0.0134381	0.0642533	0.0166578	0.0883834	0.00196867	4.29506	1.81872	2.06755	2.30392	2.34679
69	2007-08-10	23.0667	58.7083	99.7967	2.9879	0.824475	0.02612	0.0189193	0.0129098	0.111151	0.00489464	0.486984	0.36884	0.249224	1.85156
70	2007-08-13	22.6833	56.375	100.137	2.48784	0.305575	0.00487134	0.0230608	0.0113595	0.0866535	0.00652058	0.522603	0.119501	0.192643	1.7496
71	2007-08-16	24.4125	54.25	99.6617	3.32914	0.391585	0.0302264	0.05536	0.0184823	0.121128	0	1.59984	0.264328	0.564989	1.7662
72	2007-08-19	18.0167	59.25	100.685	1.53969	0.318013	0.0346753	0.0375631	0.00656677	0.0330626	0	1.11045	0.153877	0.415118	1.81337
73	2007-08-22	19.1292	87.8333	100.37	1.15976	0.205657	0.0253591	0.0424437	0.00699586	0.0537703	0	3.31896	1.90761	1.67651	2.24197	2.2901
74	2007-08-25	22.4708	89.125	99.4171	3.37562	0.448416	0.0514896	0.0690154	0.00919684	0.0439606	0.0100597	4.2805	1.66001	1.86533	2.50227	2.54037
75	2007-08-28	22.3125	78	100.508	2.62677	0.44876	0.0455019	0.0579011	0.0128091	0.0959112	0	3.58701	0.763475	1.37131	2.09989	2.16023
76	2007-08-31	20.125	58.3333	100.588	1.98327	0.399839	0.0389503	0.0213392	0.00774007	0.0711127	0	0.359233	0.13061	0.169391	1.8115
77	2007-09-03	22.2125	59.7917	100.207	3.35788	0.35592	0.032013	0.0606134	0.0121175	0.0791681	0	2.53567	0.765012	1.0467	1.96109
78	2007-11-08	3.39167	74.75	100.596	2.31157	0.365531	0.00241706	0.015408	0.00145243	0.0115583	0.00134497	0.214714	0.340739	0.177848	3.24665	3.28875
79	2007-11-11	5.16667	82.2083	100.927	1.57253	0.593013	0.025636	0.0867045	0.00687681	0.0636824	0.0338274	2.36605	4.29987	2.027	3.0138	3.07274
80	2007-11-14	11.2083	77.4167	98.9075	3.14239	0.115403	0.0528682	0.0570478	0.00726694	0.0606569	0	3.50325	3.19578	2.0685	2.87712	2.91767
81	2007-12-05	-7.325	72.2917	99.6742	1.19598	0.0574013	0.188152	0.0283123	0.0100071	0.0426551	0.0772581	0.271873	0.701598	0.176858	3.5678	4.05397
82	2007-12-08	0.208333	66.6667	101.06	0.925149	0.205724	0.0902853	0.0433837	0.00390426	0.0281333	0	2.26899	2.87507	1.54874	2.82369	2.91813
83	2007-12-11	0.854167	89.3333	100.64	1.48376	0.0052063	0.0446967	0.107	0.00475495	0.035405	0.21083	3.34884	6.98077	3.15513	3.44159	3.49338
84	2007-12-14	-0.654167	70.375	100.7	0.783975	0.03695	0.0519082	0.0311688	0.00445056	0.0301339	0	1.91439	2.21552	1.29432	2.88679	2.96245
85	2007-12-17	-4.79167	82.7917	100.137	1.86974	0.150667	0.0445225	0.0370529	0.00124037	0.00956943	0	0.9386	1.62664	0.803143	3.7625	3.80578
86	2007-12-20	0.225	80.25	100.83	0.294429	0.212755	0.0368006	0.067713	0.00253696	0.0236757	0	5.0809	4.83728	3.41419	2.68416	2.76895
87	2007-12-23	4.14583	83.5	99.3171	0.654688	0.350752	0.0433285	0.030142	0.00383654	0.0178225	0	2.77713	0.909765	1.21067	2.57713	2.64175
88	2007-12-26	-0.925	92.0417	100.718	0.383776	0.164137	0.0244051	0.0429053	0.00119137	0.0198132	0.0277328	5.54462	4.42132	3.22641	2.82577	2.91811
89	2007-12-29	2.81667	72.9583	99.875	0.449848	0.0416483	0.0227702	0.0317125	0.00223849	0.0204088	0	2.48596	1.38881	1.27584	2.43459	2.49141
90	2008-01-10	2.4875	79.875	100.375	1.71272	0.608779	0.0224767	0.0251932	0.00759917	0.0496394	0	0.901715	1.49129	0.757785	3.20291	3.26198
91	2008-01-13	2.23333	89.8333	100.365	0.979299	0.270645	0.0392212	0.0584953	0.00793956	0.0365505	0.0534736	2.65656	6.59134	2.8397	3.1792	3.24034
92	2008-01-16	-1.17917	74.5833	101.047	0.875843	0.484083	0.0796763	0.04359	0.0108527	0.0488388	0.0184028	2.17697	2.34367	1.35141	2.91908	3.03532
93	2008-01-19	-5.0625	61.5417	100.085	0.581249	0.154789	0.0886022	0.0466342	0.0102059	0.0376819	0.0567337	1.15109	3.04619	1.25041	2.9604	3.14389
94	2008-01-22	-2.7125	77.5833	100.027	0.245941	0.344944	0.0456854	0.0476507	0.00642295	0.014885	0.000350987	2.02204	3.30961	1.59331	2.36827	2.53312
95	2008-01-25	-6.94167	67.75	101.106	0.827938	0.278569	0.214617	0.0625809	0.0107613	0.0401303	0.237219	1.31362	5.1408	1.78851	3.25401	3.47712
96	2008-01-28	-0.375	80.75	100.441	0.133332	0.438095	0.0742837	0.109071	0.0107312	0.0484994	0.206772	6.67106	12.2342	5.53458	1.75004	1.87912
97	2008-01-31	-6.58333	63.7917	101.783	0.692699	0.23484	0.370971	0.0647144	0.0475192	0.0734757	0.291128	1.53561	2.89885	1.13797	2.9398	3.44083
98	2008-02-03	0.4875	83.4583	100.849	0.113492	0.179925	0.114875	0.070454	0.00466818	0.0181894	0.0205979	8.68071	5.69234	4.59539	1.86955	2.06728
99	2008-02-06	-0.808333	95.625	99.0929	0.278369	0.539031	0.0712639	0.0286604	0.00317447	0.0237679	0.0566353	2.46889	0.522529	0.981395	2.45254	2.80557
100	2008-02-09	1.4625	93.25	99.3863	0.177666	0.176208	0.0560122	0.0487572	0.00465215	0.0319106	0.0611822	4.6949	4.27152	2.84479	2.26423	2.50964
101	2008-02-12	-8.94583	85.3333	100.819	0.688239	0.315181	0.199164	0.0570975	0.0104518	0.0242549	0.235427	2.04452	2.65629	1.42884	3.50992	3.70641
102	2008-02-15	-3.875	66.2083	100.518	0.561785	0.264121	0.108808	0.0308264	0.00619302	0.0171732	0.0434188	1.98003	1.94591	1.21948	2.79587	2.94628
103	2008-02-18	3.05833	82.1667	98.3517	0.363259	0.175581	0.0499587	0.0328543	0.00449743	0.0177752	0.0201238	2.71282	1.81305	1.51899	2.4985	2.5828
104	2008-02-21	-6.89167	62.0417	101.284	1.85569	0.400272	0.201877	0.0232098	0.00668546	0.0390018	0.0514484	0.925954	1.12282	0.534244	3.54065	3.75649
105	2008-02-24	-2.05833	66.375	100.426	0.421686	0.340169	0.162904	0.0861369	0.0104438	0.0855468	0.188018	4.55757	13.7504	5.52587	2.548	2.82597
106	2008-02-27	-11.3833	60.4583	99.4804	0.496367	0.233808	0.297721	0.0200494	0.0295872	0.0290499	0.22625	0.582513	0.585615	0.285656	3.09599
107	2008-03-01	-1.02917	73.5417	100.057	0.182976	0.120634	0.0440584	0.0393252	0.00629048	0.012129	0	3.383	2.82033	2.02739	2.32878	2.44403
108	2008-03-04	-1.35	66.2083	100.115	0.737462	0.191608	0.0691786	0.019516	0.0160161	0.0681437	0.0284813	0.994476	0.457251	0.467099	2.77063	2.95505
109	2008-03-07	-1.075	81.5	100.712	0.594644	0.272827	0.0736064	0.0405934	0.00980498	0.0298659	0.0871389	2.63554	5.94397	2.70652	2.99156	3.08875
110	2008-03-10	-4.96667	70.7083	101.297	0.998514	0.281875	0.0947781	0.0687235	0.0100155	0.0324111	0.103256	1.9813	4.8792	2.061	3.2878	3.39307
111	2008-03-13	-1.09167	71.4167	99.5804	1.11142	0.495853	0.107554	0.0312432	0.0116134	0.036114	0.0594262	0.97474	2.50999	1.06813	3.12579	3.24216
112	2008-03-16	-0.291667	66.7083	100.887	0.665863	0.471776	0.348341	0.0743131	0.0167999	0.105879	0.373947	0.895947	0.387691	0.457746	2.68467	3.37727
113	2008-03-19	3.4625	92.2083	98.9813	0.556219	0.31306	0.0119854	0.0296447	0.00422807	0.0157556	0.005752	2.12634	2.61866	1.57424	2.9363	2.98029
114	2008-03-25	0.225	81	100.223	1.41296	0.523078	0.0867507	0.0469904	0.0149946	0.0870727	0.105513	2.6291	3.22034	1.83419	3.21786	3.31195
115	2008-03-28	1.08333	55.9167	100.393	0.997326	0.605788	0.159378	0.0260198	0.0259343	0.131147	0.0783855	0.906396	0.717358	0.461579	2.64505
116	2008-03-31	5.125	93.75	100.556	1.6964	0.587275	0.0356701	0.0418606	0.00965452	0.0332137	0.0942699	2.18795	2.87723	1.69273	3.40748	3.45225
117	2008-04-03	4.6375	47.25	101.162	1.34143	0.694793	0.0330734	0.04149	0.0190885	0.148568	0	1.59232	1.82818	1.02606	2.48192
118	2008-04-06	8.54167	57.3333	100.778	1.23245	0.793853	0.0193641	0.0444978	0.00980097	0.0614032	0	2.66056	2.71431	1.75655	2.40245
119	2008-04-09	10.8917	72.4583	100.186	1.65469	0.61044	0.189491	0.0234966	0.0201111	0.122392	0.00771964	3.69067	2.13653	1.91716	2.51055	2.63119
120	2008-04-12	5.76667	95.8333	98.8271	1.25633	0.381431	0.0271335	0.0186071	0.00746841	0.053446	0.00866664	1.17869	2.33654	1.18839	3.41268	3.4738
121	2008-04-15	6.63333	48.5	100.913	1.43544	0.349897	0.0429519	0.0461418	0.0334991	0.226376	0.021816	1.34521	1.99087	0.986449	2.47993
122	2008-04-18	16.1417	55.125	100.183	4.44849	1.69007	0.0629105	0.101867	0.0426316	0.299628	0.0117719	7.29567	7.00003	4.4287	2.48634
123	2008-04-21	16.5292	69.1667	100.815	2.54414	0.556039	0.21788	0.0409065	0.0274799	0.0970672	0.0586061	4.62614	1.43246	1.88931	2.27325	2.37842
124	2008-04-24	14.9417	29.4167	101.111	2.34753	0.452824	0.0388675	0.0315842	0.0155729	0.110633	0.0175635	0.966104	0.354266	0.451438	1.91836
125	2008-04-27	13.2	52.9167	100.436	6.47985	1.06386	0.0284204	0.0571442	0.0402606	0.260143	0.00612708	2.50944	4.28836	2.04413	2.85917
126	2008-04-30	5.70417	52.875	100.393	2.51373	0.791078	0.0405922	0.0405391	0.0227706	0.122434	0.0110653	1.57786	0.995769	0.89576	2.78896
127	2008-05-03	11.6792	97.2083	99.3133	2.23483	0.939751	0.0185689	0.0404186	0.00714548	0.0423606	0.0251785	3.46741	2.93044	2.14108	3.39965	3.43156
128	2008-05-06	11.4792	42.2917	100.28	2.55873	0.35235	0.0228998	0.0279306	0.0194776	0.1267	0	1.15666	1.17052	0.73245	2.3515
129	2008-05-09	11.1458	58.8333	99.5708	1.89841	0.480688	0.00277092	0.013525	0.0110596	0.10025	0.0130067	0.502007	0.307723	0.257497	2.34367
130	2008-05-12	13.0833	71.625	99.5963	2.16327	0.515215	0.0130044	0.0180614	0.00954145	0.0536112	0.00193525	1.32995	1.796	1.03442	2.5811	2.63283
131	2008-05-15	11.9625	69.2083	100.237	2.44964	0.186145	0.00798817	0.0138621	0.0118771	0.0869226	0.00511363	0.868268	1.48335	0.721973	2.66413	2.76057
132	2008-05-18	9.23333	75.125	98.1679	1.86724	0.329552	0.0490302	0.131551	0.0144052	0.0339336	0.0226238	0.683378	0.680429	0.380213	2.73256	2.90953
133	2008-05-21	8.0875	69.7917	98.4404	1.96327	0.366536	0.501266	0.00614489	0.00430177	0.0388424	0	0.198241	0.231131	0.115894	2.76808
134	2008-05-24	15	54.5	100.536	1.78782	0.494799	0.0134894	0.0123758	0.00562481	0.0434092	0	0.580951	0.157848	0.239647	2.00029
135	2008-05-27	11.6583	61.6667	100.263	1.68698	0.673441	0.0165242	0.0174536	0.00904326	0.0838122	0.000395521	1.08042	0.298128	0.468549	2.28195	2.40609
136	2008-05-30	14.5958	54.1667	100.105	3.27544	1.18041	0.0725562	0.0553063	0.0371782	0.2527	0.0287585	2.29537	2.59292	1.35933	2.43388
137	2008-06-02	19.775	57.625	99.815	4.18493	1.4624	0.0699886	0.0856699	0.0204282	0.165129	0.0359813	2.05568	1.29483	1.06273	2.22091
138	2008-06-05	16.4458	92.5417	99.8713	2.81423	0.392928	0.0661638	0.0627414	0.0126184	0.108816	0.0449773	3.68597	4.38396	2.58541	2.93843	2.9971
139	2008-06-08	24.8958	76	99.6167	3.86858	0.784727	0.0780947	0.0718151	0.0111204	0.0565182	0.00603736	4.56428	1.01961	1.65866	2.0961	2.13895
140	2008-06-11	21.6292	63.4167	100.403	3.59316	1.4367	0.0415439	0.0305743	0.0118175	0.092784	0	1.23395	0.625289	0.544527	2.07927	2.21084
141	2008-06-14	21.5958	79.1667	99.8892	2.75153	0.697234	0.00820917	0.0525125	0.00616214	0.0417689	0.00867907	3.20064	1.41947	1.51013	2.23256	2.26153
142	2008-06-17	14.825	67.7917	99.4563	1.75136	0.558893	0.0193005	0.0160194	0.00704148	0.0516162	0.0127769	0.194168	0.0785228	0.0994456	2.16969	2.83117
143	2008-06-23	18.3417	81.2083	99.8929	3.42492	0.551178	0.00976252	0.0495547	0.0101424	0.08277	0.00929231	3.43583	3.5275	2.17585	2.95424	2.64346
144	2008-06-26	23.6583	78.3333	99.5408	3.47764	0.859126	0.0342446	0.0988709	0.0129839	0.101074	0.0357631	6.88926	3.08552	3.21096	2.22721	2.26558
145	2008-06-29	20.2667	85.5	99.0879	2.99831	0.840245	0.0377618	0.10996	0.0153189	0.0907858	0.0139814	3.12838	1.69919	1.49644	2.48437	2.55187
146	2008-07-02	21.3042	65.0833	99.6904	3.76542	1.5245	0.0472833	0.359738	0.0485289	0.169799	0.03363	3.66643	1.2352	1.48938	2.14213	2.29605
147	2008-07-05	20.5125	54.6667	100.322	2.7715	1.40206	0.0624644	0.0474295	0.013158	0.109232	0.0198043	0.722977	0.461378	0.39062	1.92547
148	2008-07-08	24.2042	83.2083	99.5312	2.76844	1.15619	0.0683343	0.131103	0.0291755	0.149925	0.0189539	10.7695	1.58609	4.10935	2.11771	2.17728
149	2008-07-23	19.9417	88.5833	99.875	2.35525	0.541502	0.0220861	0.0244677	0.00808901	0.0749093	0	0.554666	0.369013	0.277117	2.47156	2.68629
150	2008-07-26	22.8917	77.25	99.5867	2.82214	0.794895	0	0.055616	0.00692781	0.0519477	0	4.75168	1.1339	1.80567	2.08868	2.11241
151	2008-07-29	22.2917	73.4583	99.9042	1.83232	0.895097	0.0578971	0.0382241	0.0110789	0.0930223	0.0280951	1.81516	0.389558	0.640383	1.85428	1.96437
152	2008-08-01	23.225	70.2083	99.2733	2.94168	0.703728	0.0420383	0.0334711	0.0132714	0.104373	0.0167568	1.06584	0.29499	0.385571	1.97076	2.14512
153	2008-08-04	22.2792	70.75	100.089	2.98626	0.711583	0.0176567	0.0688412	0.00765848	0.0421546	0	2.0319	0.356335	0.757709	2.03603	2.08379
154	2008-08-07	20.3875	74.125	99.4579	2.87773	0.706724	0.00949808	0.0235784	0.00811005	0.0692607	0	0.660576	0.235789	0.261237	2.17878	2.32961
155	2008-08-10	14.7875	91.5	99.5242	1.77558	0.211251	0.0124793	0.024882	0.00213801	0.0224735	0	0.675604	0.50231	0.348109	2.75512	2.81418
156	2008-08-13	19.3792	79.7083	99.5088	3.17425	0.270551	0.0228501	0.0407851	0.035162	0.204584	0	1.21332	0.657914	0.446415	2.37994	2.67061
157	2008-08-16	20.7458	70.625	100.143	3.13141	0.331087	0	0.0173838	0.00873436	0.0595682	0.0287028	0.313776	0.23383	0.125874	2.13299	2.45459
158	2008-08-19	16.9	72.2083	100.548	1.56986	0.129637	0	0.00356117	0.00430976	0.00720483	0.0288678	0.299906	0.393067	0.156431	2.06781	2.10857
159	2008-08-22	22.7958	79.5833	100.906	2.63266	0.800835	0	0.0128189	0.0180982	0.107156	0.0241728	6.91174	1.17075	2.58626	2.094	2.12628
160	2008-08-28	18.9958	83.625	100.062	1.96668	0.285903	0	0.00550291	0.00794405	0.0970323	0.0248862	0.682333	0.424774	0.318878	2.28139	2.45316
161	2008-08-31	21.5917	67.8333	100.849	0.774373	0.584374	0	0	0.00371485	0.0244421	0.0158241	0.361859	0.250266	0.211168	1.47513	1.54559
162	2008-09-03	23.5708	72.625	100.002	3.85364	2.09295	0	0.0503116	0.0482832	0.209496	0.0228232	9.77674	2.33125	3.81815	2.11867	2.16912
163	2008-09-06	17.475	82.4167	99.905	1.87687	0.157985	0	0.00676519	0.00366796	0.0206096	0.0278911	0.678828	0.487793	0.338928	2.32084	2.35873
164	2008-09-12	20.8	91.1667	99.9554	3.26334	0.243303	0	0.0220911	0.00916068	0.0710452	0.0404176	9.33189	3.80998	4.4274	2.66081	2.67881
165	2008-09-15	15.1708	78.0833	99.8138	1.26217	0.293591	0	0	0.00732391	0.0172638	0.0303464	0.85449	0.175309	0.331813	2.15613	2.18736
166	2008-09-18	15	75.0417	101.264	1.93473	0.119991	0	0.0075083	0.00813798	0.0562417	0.0252797	0.641284	0.258279	0.266709	2.30315	2.40877
167	2008-09-21	16.3292	82.7083	101.145	1.81113	0.336375	0	0.018428	0.00523344	0.0317081	0.02025	3.19154	0.680583	1.22801	2.34519	2.36603
168	2008-09-24	17.9708	81.875	101.471	2.21794	0.798254	0.45025	0.0394399	0.00557864	0.0781929	0	3.37331	1.36334	1.44671	2.36317	2.54727
169	2008-09-27	17.3083	96.7083	100.315	2.33276	0.548625	0	0.00465188	0.000788044	0.019323	0	1.01749	0.885672	0.637601	3.09146	3.10777
170	2008-09-30	15.4917	88.2083	99.2975	2.11628	0.209585	0	0.0377497	0.00512247	0.04533	0.0155025	2.82255	1.11478	1.26143	2.64123	2.67168
171	2008-10-03	9.45	74.0417	99.8554	1.81684	0.201168	0	0.0151127	0.00313892	0.0343336	0.00594914	0.240769	0.141022	0.103169	2.60921	2.78975
172	2008-10-06	9.94167	69.0417	101.566	1.59876	0.383042	0	0.0216774	0.00981604	0.0836151	0	0.775748	0.359829	0.361031	2.47034	2.60932
173	2008-10-09	15.8583	68.125	99.8171	1.87257	0.229994	0	0.0141542	0.0113092	0.0886029	0	1.61733	0.800148	0.787577	2.18093	2.25558
174	2008-10-12	15.125	81.7083	101.631	2.85426	0.548465	0.021847	0.0137907	0.00681972	0.0454041	0	1.45236	1.98616	1.07117	2.73139	2.76938
175	2008-10-15	12.1792	79.0833	100.41	2.78425	0.478807	0.0250473	0.0117266	0.0106478	0.0628787	0	0.911533	1.78548	0.773404	2.85464	2.91574
176	2008-10-18	8.175	62.9583	101.257	1.87958	0.367139	0.0512745	0.0294448	0.00342682	0.0277926	0.00665144	0.462011	0.380585	0.269561	2.62495	2.79644
177	2008-10-21	5.1375	83.9167	100.398	1.28487	0.133192	0.0145121	0	0.00343424	0.00999018	0	0.484436	0.950939	0.451084	3.02161	3.05262
178	2008-10-24	9.8625	77.2083	100.955	1.33963	0.534113	0.038522	0.00909966	0.00510794	0.0235558	0	1.76131	1.58322	1.04332	2.57844	2.61831
179	2008-10-27	6.85417	82.5833	99.7933	1.64558	0.174065	0.00746704	0	0.00336748	0.0125412	0	0.879816	0.511286	0.438845	2.91412	2.93717
180	2008-10-30	4.61667	66.2917	101.266	2.24434	0.289102	0.0226212	0.000423668	0.0163443	0.0779854	0	0.515003	0.772952	0.345551	3.01598	3.15585
181	2008-11-02	3.5125	73.4583	101.654	1.33567	0.25528	0.0925688	0	0.00740167	0.0183453	0	0.338107	0.352812	0.153057	2.90898	3.10879
182	2008-11-05	12.6083	85.2083	100.634	2.37324	0.399375	0.0587214	0.0716371	0.019797	0.118919	0.0733973	8.76153	8.99384	5.25978	2.73138	2.78862
183	2008-11-08	8.5625	80.75	98.8371	1.33417	0.0582718	0.00855631	0	0.00299393	0.015228	0	2.021	2.48131	1.4131	2.7502	2.76632
184	2008-11-11	4.69167	74.9167	101.085	2.46269	0.155406	0.014955	0.0226327	0.00332646	0.0298167	0	0.458669	0.65019	0.308371	3.1579	3.22513
185	2008-11-14	11.8458	88.625	99.2554	1.89962	0.158297	0.0151002	0.0350105	0.00535402	0.0617224	0.00289633	4.17655	2.91475	2.32458	2.84565	2.87989
186	2008-11-17	0.075	73.9583	100.145	0.933168	0.152727	0.0157562	0.017034	0.00251404	0.0372263	0	0.30312	0.506169	0.219252	3.00476	3.11691
187	2008-11-20	-1.02083	82.125	99.8575	0.625729	0.260454	0.0497891	0.0237448	0.00105408	0.01984	0.0230102	0.855723	3.05818	1.24186	3.07645	3.14422
188	2008-12-02	0.570833	73.9583	99.8908	0.833529	0.134001	0.0182951	0	0.00436881	0.0302833	0	1.23103	0.989272	0.769121	2.8907	2.9383
189	2008-12-05	-3.90417	65	100.765	0.966733	0.104324	0.0329989	0	0.00947941	0.0467851	0.0118768	1.17492	1.50357	0.899954	3.15375	3.24432
190	2008-12-08	-5.89583	74	101.04	0.685229	0.430254	0.140783	0	0.00666103	0.0281104	0.107186	0.740792	1.43093	0.713095	3.23771	3.40946
191	2008-12-11	-3.14167	86.1667	100.26	0.94246	0.0399204	0.048755	0	0.00505033	0.019484	0.0149925	1.87198	2.28625	1.33121	3.39693	3.44334
192	2008-12-14	3.98333	80.5	100.419	0.736722	0.280044	0.034974	0	0.00263236	0.0070669	0.052716	1.66985	1.43136	1.08311	2.74748	2.78083
193	2008-12-17	-1.03333	85.9583	100.39	1.13938	0.118887	0.190379	0.117577	0.008368	0.0257537	0.0241872	2.17867	2.50712	1.37538	3.28206	3.42638
194	2008-12-20	-12.8208	77.7917	100.743	0.868416	0.271542	0.14893	0.0348792	0.00719541	0.00132617	0	0.934466	1.13966	0.574208	3.78097
195	2008-12-23	-6.17917	83.8333	101.436	0.374962	0.379863	0.183549	0.0477848	0.0205666	0.0384081	0.0343761	2.00032	4.75217	1.8032	2.25172	2.96739
196	2008-12-26	-0.325	80.75	101.264	0.536827	0.326438	0.111003	0.078403	0.0113177	0.028572	0	3.44133	3.38743	2.04029	2.59763	2.79345
197	2008-12-29	2.08333	72.3333	99.7413	0.951653	0.104562	0.0322323	0.031253	0.00545624	0.0404446	0	2.45092	3.56005	1.80827	2.82018	2.87702
198	2009-01-01	-8.32083	69.0833	100.987	0.766966	0.583544	0.108217	0.0403043	0.0067225	0.00603547	0	0.696431	0.689628	0.36953	3.2532	3.435
199	2009-01-04	-5.0375	75.75	100.433	1.51954	0.46796	0.215362	0.0290269	0.00292266	0.0147146	0.0908533	0.523451	1.09011	0.414684	3.55663	3.75848
200	2009-01-07	0.2125	97.8333	97.4742	0.53797	0.370354	0.0236819	0.0216912	0	0.00418551	0.00845144	1.409	2.12069	1.1198	3.49431	3.53689
201	2009-01-10	-8.64583	77.6667	100.694	0.799377	0.938686	0.176014	0.0292131	0.00414178	0.0157051	0.202314	0.687461	1.21167	0.612826	3.45077	3.65185
202	2009-01-13	-3.07083	81.4167	99.6013	0.535372	0.155227	0.026674	0.0355158	0	0.00750524	0.00751843	2.57336	2.24337	1.54443	2.96282	3.01342
203	2009-01-16	-13.6333	68.4167	101.526	0.957433	0.849894	0.142713	0.0517461	0.00302682	0.00882583	0.122967	1.48275	2.69368	1.26784	3.72393
204	2009-01-19	-6.65417	82.7083	99.0321	0.151652	0.308577	0.0534719	0.11381	0.00618083	0.0400238	0.163467	4.4318	11.9259	4.67885	1.63662	1.79572
205	2009-01-22	-2.68333	80.4583	99.7837	0.23624	0.267625	0.050898	0.136059	0.00408714	0.023908	0.147223	5.45029	13.9321	5.40302	1.68533	1.77492
206	2009-01-25	-10.4375	67.9167	100.965	0.595781	0.831663	0.177446	0.0501236	0.00628832	0.0227532	0.196643	1.54126	3.49782	1.48412	3.13549
207	2009-01-28	-4.09583	91.9167	99.5038	0.45155	0.37602	0.0520735	0.0555351	0.000408347	0.0115459	0.0427834	2.36309	2.97624	1.64085	3.08694	3.21098
208	2009-01-31	-8.69583	76.25	99.86	0.394676	0.545495	0.04553	0.0221681	0.00760459	0.0251143	0.0556522	1.32934	2.6583	1.24622	3.04516	3.19301
209	2009-02-03	-3.22917	83.3333	100.033	0.595412	0.448908	0.0580011	0.0388354	0	0.022776	0	2.08034	5.1375	2.10567	2.9655	3.06819
210	2009-02-06	-4.575	69.7917	101.032	0.163347	0.581701	0.139091	0.117033	0.00830275	0.0571654	0.292187	4.14174	11.7951	4.54342	1.7168	1.96019
211	2009-02-09	0.575	79	101.291	1.52369	0.865055	0.0345964	0.0635727	0.0066915	0.0375899	0.113185	1.01996	5.2393	1.85571	3.26485	3.31921
212	2009-02-12	4.5625	86.0833	98.2967	0.996677	0.169634	0	0.0108506	0.0029071	0	0.0109958	0.476041	0.503879	0.345874	2.965	2.98144
213	2009-02-15	-2.84583	64.4583	100.784	0.826732	0.184219	0.0666725	0.0249047	0.00584295	0.0263513	0.0339071	0.582762	0.686937	0.388957	2.9814	3.1399
214	2009-02-18	1.0625	85.25	98.5988	0.646511	0.801407	0.0121367	0.0455119	0.00712849	0.0287216	0.106381	2.38328	3.15306	1.80621	2.84393	2.90963
215	2009-02-21	-3.34167	81.5417	100.375	0.873257	0.517434	0.141704	0.0455296	0.00562679	0.0240687	0.102895	1.4781	1.71333	1.02694	3.23041	3.36211
216	2009-02-24	-6.775	66.0417	101.662	0.897527	0.482255	0.279716	0.0439774	0.00988007	0.0374152	0.183262	1.31832	1.69775	0.882486	3.21043	3.48941
217	2009-02-27	0.841667	85.0417	99.4467	0.722798	0.24253	0.0716186	0.0634746	0.0145714	0.0174217	0.11107	2.60028	3.97435	2.08474	2.99146	3.08318
218	2009-03-02	-11.5083	54.4583	101.422	0.518229	0.310028	0.0771462	0.0103771	0.0158724	0.0646156	0.0566878	0.625775	0.329173	0.304307	2.81888
219	2009-03-05	1.25	62.5417	100.77	2.39759	0.719801	0.0933033	0.115565	0.0216693	0.156815	0.146524	2.16703	6.34927	2.35983	3.18896	3.31096
220	2009-03-08	3.99583	89.5417	99.9371	1.25499	0.67698	0.00417479	0.0581713	0.00745667	0.0307318	0.0397333	3.19725	4.57986	2.4887	3.13286	3.17017
221	2009-03-11	2.5	73.75	100.004	0.84348	0.527055	0.0373528	0.0306619	0.0122258	0.0308243	0.0147288	1.99419	1.74837	1.21876	2.72423	2.79542
222	2009-03-14	1.92083	64.0417	100.928	1.36633	0.545563	0.0644101	0.0707031	0.016868	0.0587602	0.059125	2.0898	6.26029	2.42039	2.91595	3.0035
223	2009-03-17	7.48333	60.7917	100.685	2.92349	0.996086	0.0785551	0.0809019	0.013842	0.0906705	0	3.1853	8.44391	3.21847	2.87473	2.93638
224	2009-03-20	-1.04583	48.125	101.703	1.17139	0.560382	0.242534	0.0199058	0.0248277	0.053503	0.0262713	0.587775	0.888875	0.293515	2.73593
225	2009-03-23	-1.40833	36.875	101.955	1.26279	0.459038	0.0478573	0.024705	0.00860439	0.0535932	0	0.810717	0.538123	0.421653	2.58919
226	2009-03-26	7.83478	87.5217	99.7578	2.8899	0.260833	0.0297106	0.0715606	0.0115704	0.0757534	0	3.31865	5.74589	2.63369	3.24399	3.28581
227	2009-03-29	7.77083	80.4167	98.1067	1.62251	0.446882	0.0124073	0.0312239	0.00316145	0.0198798	0	1.64949	1.36304	1.00941	2.84238	2.87149
228	2009-04-01	7.82917	73.625	99.5292	1.81762	0.512091	0.0412146	0.0361059	0.00758985	0.0524287	0	1.70496	1.24159	0.962524	2.7676	2.8304
229	2009-04-04	4.6	73.625	98.8429	0.679172	0.308091	0.0166643	0.0192269	0.00203892	0.0151186	0	0.525438	0.0991524	0.212764	2.4465
230	2009-04-07	-1.20833	77.4167	98.32	0.668423	0.331008	0.094008	0.0364787	0.0030107	0.0116007	0.00776128	0.488487	0.162101	0.20481	2.88705	3.07967
231	2009-04-10	5.875	56.0417	100.214	1.52736	0.612271	0.0400382	0.0269549	0.00425526	0.0321176	0	1.83228	0.3968	0.773964	2.51049
232	2009-04-13	3.52917	41.875	100.829	0.49198	0.642682	0.0537934	0.0376804	0.010413	0.0647987	0	2.06756	0.265788	0.767547	1.87821
233	2009-04-16	10.1167	31.6667	101.445	2.32592	0.560456	0.0602131	0.0521205	0.0213472	0.169297	0.0046444	1.58545	0.972256	0.755429	2.18738
234	2009-04-19	8.49167	43.2083	100.502	1.43594	0.31563	0.0146094	0.0265636	0.0123668	0.097069	0	1.16407	0.21795	0.474138	2.17116
235	2009-04-22	6.35417	77.75	99.0354	1.49896	0.106877	0	0.0125184	0.00691493	0.0331448	0	0.722636	1.05698	0.550873	2.88748	2.93245
236	2009-04-25	18.2458	68.875	100.19	4.76484	1.08574	0.0264288	0.0627523	0.0220889	0.134713	0	2.28765	1.31103	1.08746	2.51053	2.60125
237	2009-04-28	12.7208	79.0417	101.125	2.7396	0.184109	0.00421731	0.0143085	0.00712008	0.0263229	0	1.0087	0.616393	0.497091	2.72122	2.76051
238	2009-05-01	15.2542	72.625	99.3971	2.12691	0.252234	0	0.0225099	0.00876303	0.0515459	0	2.01973	0.424384	0.783969	2.29396	2.33395
239	2009-05-04	13.2417	39.625	100.503	1.95991	0.602165	0.0127464	0.0366257	0.0176153	0.15943	0	2.02546	0.254555	0.764402	1.99404
240	2009-05-07	14.7125	82.3333	99.3812	2.463	0.289621	0.0119561	0.0469731	0.00741214	0.0350297	0	4.10329	2.78175	2.1562	2.63945	2.66383
241	2009-05-10	9.48333	62.25	100.153	1.77126	0.282796	0.00129367	0.01596	0.00502313	0.00232524	0	0.986688	0.157672	0.376282	2.40016	2.42122
242	2009-05-13	14.175	49.6667	100.726	2.84133	0.954605	0.00674446	0.0406557	0.013651	0.0710404	0	2.66756	0.928412	1.1409	2.25062
243	2009-05-16	13.075	75.8333	99.7638	2.29518	0.200003	0.0366297	0.0585803	0.00776509	0.0254466	0.0193164	1.27473	0.743674	0.651199	2.56561	2.63669
244	2009-05-19	14.3708	50.1667	101.168	2.87753	0.793167	0.00784894	0.12134	0.0229628	0.0897314	0	2.24868	0.659798	0.89194	2.22921
245	2009-05-22	18.325	54	100.731	3.41536	0.741234	0.000427259	0.0324285	0.0190434	0.130848	0	1.05844	0.414227	0.487494	2.1181
246	2009-05-25	14.4	51.375	100.684	1.86355	0.620714	0	0.011466	0.011444	0.0945953	0	1.06826	0.223861	0.453798	2.03078
247	2009-05-28	13.9875	99.7083	99.16	3.34466	0.201845	0	0.0202895	0.00175013	0.00193862	0	0.563671	0.995502	0.53263	4.39033	4.40319
248	2009-05-31	10.4125	48.2083	99.8042	1.24752	0.0634106	0	0.0129136	0.00249374	0.00560282	0	0.48237	0.203332	0.255197	2.04197
249	2009-06-03	13.8958	56.9167	100.4	2.12273	0.288998	0	0.0107842	0.00744794	0.0371584	0	0.394064	0.547469	0.274231	2.20374
250	2009-06-06	17.2583	55.0417	99.96	3.18824	0.576125	0	0.0272144	0.0161865	0.085344	0	1.05769	1.19147	0.711046	2.21326
251	2009-06-09	14.825	83.2917	99.6863	1.72391	0.0263	0	0.012545	0.0100431	0.075343	0	0.614191	1.06898	0.501204	2.54574	2.67376
252	2009-06-12	18.9458	66.9583	99.6896	3.15538	0.210065	0	0.0197423	0.0140256	0.113311	0	0.495351	0.444133	0.287322	2.19625	2.5853
253	2009-06-15	19.7792	60.7083	100.299	2.57546	2.23876	0.0243392	0.0250674	0.00825154	0.0486134	0.00572861	1.54831	0.953428	0.862378	2.04828	2.11307
254	2009-06-18	15.3875	95.9583	99.6213	2.49236	0.547836	0.0225663	0.0147903	0.0054644	0.0383735	0.011318	0.778198	0.996141	0.5553	3.16113	3.2157
255	2009-06-21	21.6	76.25	99.4267	1.95172	0.539894	0.0274154	0.0204817	0.00494073	0.038858	0.0125772	0.631352	0.235668	0.338977	1.99144	2.11132
256	2009-06-24	25.725	59.4167	99.7108	3.41118	1.85617	0.0540362	0.0236125	0.0233771	0.168413	0.00590746	0.662536	0.444212	0.351609	1.79153
257	2009-06-27	22.6125	56.125	99.6471	1.98173	0.491963	0.0182648	0.0188159	0.00871199	0.0697677	0.0149444	0.496226	0.232913	0.196119	1.65589
258	2009-06-30	18.8708	85.7083	98.3854	2.47294	0.246854	0.0265223	0.0922704	0.00807245	0.051535	0.0135851	1.55414	1.06192	0.855118	2.49187	2.57458
259	2009-07-03	19.3083	76.0417	99.7796	1.96276	0.192435	0.00982817	0.014189	0.0110228	0.0636003	0.00818192	0.32798	0.201152	0.146323	2.08958	2.50182
260	2009-07-06	19.8917	63.625	99.4092	2.86567	0.454525	0.0209068	0.0375583	0.0366937	0.151173	0.00766155	0.981983	0.738926	0.528553	2.07574	2.39006
261	2009-07-09	19.5083	71.7917	100.758	2.78488	0.341501	0.0271637	0.0245519	0.00611564	0.0537108	0	0.508399	0.446131	0.254758	2.17945	2.38359
262	2009-07-12	18.5583	48.4167	100.09	1.79767	0.321788	0.0119623	0.0118237	0.00436573	0.0205608	0	0.417941	0.0408143	0.165335	1.7407
263	2009-07-15	18.6458	69.2083	100.235	4.21822	1.23856	0.0192204	0.0408145	0.0186464	0.140667	0	0.898348	0.715726	0.448904	2.43726	2.65692
264	2009-07-18	18.7083	68.2083	99.5421	2.64242	0.462338	0.0215591	0.0154868	0.00643243	0.0427821	0	0.435023	0.0987465	0.176956	2.13309	2.31799
265	2009-07-21	18.7792	79.5417	100.722	3.14538	0.383437	0.0423958	0.0267287	0.0129398	0.0966126	0.00542113	0.978999	0.879726	0.552945	2.45337	2.6174
266	2009-07-24	20.0042	90.375	99.5983	3.73827	0.819791	0.0482343	0.0411919	0.00668675	0.0396738	0	1.87879	1.18097	0.981295	2.75962	2.80861
267	2009-07-27	21.0625	82.7917	99.6433	3.2192	0.56941	0.00955377	0.0302112	0.00860086	0.0486424	0	1.32636	0.697477	0.632138	2.3881	2.4473
268	2009-07-30	20.4292	75.6667	99.6754	3.49188	0.734277	0.0253972	0.0323673	0.0125188	0.0722171	0	1.38189	0.62948	0.623936	2.31155	2.39985
269	2009-08-02	21.9792	68.5417	99.5879	2.99397	0.196793	0.0165872	0.0447109	0.012028	0.083721	0	2.77552	0.937426	1.1045	2.03028	2.0814
270	2009-08-05	19.3917	61.4167	100.063	2.33657	0.112731	0.0290483	0.0169154	0.00472382	0.0287244	0	0.25103	0.242349	0.1056	1.94986	2.31732
271	2009-08-08	18.8667	77.0417	100.645	2.33998	0.977652	0.0334959	0.0186283	0.00831013	0.0595782	0.0279761	0.921871	0.500212	0.505776	2.92115	2.38129
272	2009-08-11	22.1625	81.6667	99.8396	3.39768	0.515476	0.0540844	0.0386173	0.0126208	0.0931105	0.0375233	0.770605	0.559237	0.386104	2.3167	2.57787
273	2009-08-14	24.525	73.7917	100.681	5.74334	1.66053	0.0243673	0.0251605	0.013964	0.107755	0.0236148	2.5448	0.323865	0.992115	2.27462	2.33291
274	2009-08-17	27.1458	77.9167	100.358	2.83218	0.759707	0.0346924	0.0930293	0.013555	0.0878404	0.0269579	11.9771	0.721409	3.92716	1.80464	1.8366
275	2009-08-20	24.6875	83.8333	99.3904	2.45785	0.746646	0.0214961	0.0154296	0.00944994	0.0635976	0.0263599	3.75949	0.520492	1.3191	2.05085	2.08525
276	2009-08-23	20.05	81.0833	100.008	0.865125	0.302679	0.0192102	0	0	0	0.0236804	0.2093	0.0435185	0.0772894	1.78047	1.84524
277	2009-08-26	20.6458	72.75	100.246	2.46172	0.343854	0.0472082	0.00545037	0.00755968	0.05876	0.0286844	1.42844	0.567222	0.62214	2.0814	2.15662
278	2009-08-29	19.1417	84.125	99.1075	2.26919	0.254938	0.0258914	0.0136081	0.0050618	0.0435662	0.0240954	1.68294	0.644133	0.773593	2.36099	2.40881
279	2009-09-01	17.375	66.875	101.175	2.11564	1.04325	0	0.0211224	0.00892008	0.0793438	0	0.797502	0.540682	0.406392	2.13427	2.26601
280	2009-09-04	20.0375	67.625	100.552	3.71938	1.88529	0	0.0472631	0.0748347	0.294379	0	2.33069	1.42561	1.14341	2.28655	2.48574
281	2009-09-10	19.4875	71.4583	101.252	2.57676	0.528729	0	0.00145402	0.00651649	0.0524038	0	0.744377	0.400513	0.356162	2.14553	2.21933
282	2009-09-13	19.5833	71.7917	100.197	2.18712	0.852413	0	0.0384073	0.0101733	0.0654373	0	1.13116	0.27775	0.408631	2.05757	2.14296
283	2009-09-16	14.8083	69.5417	101.099	1.65374	0.283821	0	0.000323741	0.00390811	0.0398639	0	0.204399	0.296102	0.102056	2.16755	2.41486
284	2009-09-19	12.9917	66.5417	101.236	1.79156	0.406427	0.00763021	0.00197523	0.00334303	0.030178	0	0.13603	0.419715	0.0960532	2.30062	2.64611
285	2009-09-22	21.7	93.6667	100.507	3.85837	0.376391	0.0120952	0.00387493	0.00768926	0.0380976	0	5.45998	2.31079	2.66147	2.81316	2.82775
286	2009-09-25	13.7917	70.6667	101.195	1.48474	0.294774	0	0	0.00288445	0.000304022	0	0.234334	0.0591974	0.0842614	2.17607	2.19138
287	2009-09-28	15.9417	81.875	97.7758	1.81326	0.142244	0.00294473	0	0.00737797	0.0337937	0	2.46631	0.851996	1.05216	2.37845	2.40154
288	2009-10-01	8.69167	76.7917	100.187	1.77279	0.136569	0.0314945	0	0.014744	0.0319123	0	0.231408	0.335393	0.0909989	2.74313	3.01667
289	2009-10-04	11.6417	89.5	99.7321	2.38122	0.115738	0.0175719	0.00182277	0.00817378	0.0297731	0	1.34234	1.44073	0.887976	3.01593	3.0488
290	2009-10-07	11.9917	78.7917	98.7846	1.38238	0.0419808	0.00296509	0	0.00657776	0.0178852	0	0.5235	0.418784	0.25773	2.42043	2.47238
291	2009-10-10	10.0333	75	100.159	1.21946	0.0642652	0.00611526	0	0.00485859	0.0149021	0	0.435358	0.376805	0.235461	2.42	2.47635
292	2009-10-13	7.2125	75.4583	100.725	1.48989	0	0.00865511	0	0.0103009	0.0454158	0	0.673461	1.10632	0.542666	2.80716	2.87384
293	2009-10-16	3.7125	62.375	100.368	1.33742	0.148953	0.0278772	0.0173591	0.00843029	0.0868802	0.0416878	0.770268	0.946559	0.551043	2.78376	2.92944
294	2009-10-19	8.25	73.0417	100.487	2.81588	0.239674	0.0439493	0.0853695	0.0175405	0.108625	0.0462798	1.91228	2.13071	1.29093	2.96309	3.04917
295	2009-10-22	10.5083	85.7083	100.036	2.62812	0.176697	0.0320631	0.0404436	0.00944912	0.0599172	0.0453986	2.59675	3.58368	2.01828	3.04208	3.08103
296	2009-10-25	9.41667	75.375	100.408	1.92889	0.378792	0.0293258	0.0313061	0.00488583	0.0246273	0.0511803	2.05828	1.89168	1.36885	2.76643	2.80009
297	2009-10-28	11.2696	93	100.01	1.58993	0.419854	0.0243897	0.0223075	0.00391384	0.0084664	0.0407952	1.78551	2.00946	1.31843	3.00855	3.03341
298	2009-10-31	12.2167	74.625	99.0113	1.32867	0.140798	0.0489114	0.0342563	0.00436307	0.0148436	0.0646774	1.4257	0.334204	0.635944	2.30956	2.37155
299	2009-11-03	6.74583	73.8333	100.549	1.74417	0.231681	0.0091447	0.0269164	0.00735134	0.0333881	0	0.937515	1.3289	0.686119	2.86684	2.91503
300	2009-11-06	2.78333	70.75	101.173	1.12877	0.255475	0	0.010582	0.00447218	0.0238865	0	0.50794	0.586776	0.314874	2.85205	2.9027
301	2009-11-09	13.35	78.0417	100.819	3.76675	0.665062	0.0303506	0.0835288	0.0175779	0.122907	0	3.56059	3.64405	2.31691	2.86343	2.91595
302	2009-11-12	6.25417	75.2917	101.202	2.28765	0.236195	0.0327177	0.0564961	0.00642811	0.0585842	0	0.43038	1.226	0.426059	3.07536	3.19215
303	2009-11-15	9.225	88.7917	100.089	2.49119	0.209501	0.0477074	0.0912548	0.00674043	0.0513976	0.0206834	2.0705	3.73748	1.8698	3.18202	3.23318
304	2009-11-18	7.59583	83.1667	101.213	1.88849	0.694725	0.0256035	0.0822364	0.0114201	0.103355	0	0.891493	2.03443	0.928734	3.02079	3.1233
305	2009-11-21	8.45417	85.9583	100.699	2.91899	0.206352	0.00891942	0.055875	0.0117837	0.0679916	0.0056991	3.24894	4.45136	2.4482	3.19735	3.23116
306	2009-11-24	7.62917	98	100.714	1.64597	0.158039	0.0540625	0.089268	0.00651452	0.0467935	0.0596369	1.75055	2.66804	1.50217	3.68999	3.76365
307	2009-11-27	4.87083	81.8333	99.0825	1.57623	0.242318	0.0117731	0.0352942	0.00591872	0.0403371	0	1.46529	1.89916	1.12532	3.06438	3.10636
308	2009-11-30	3.89167	75.75	99.3821	1.27841	0.0922244	0.0259365	0.0532591	0.00676071	0.046716	0	0.75661	1.28071	0.676971	2.96184	3.05031
309	2009-12-03	6.63333	87.8333	98.5921	0.712592	0.0288329	0.00281594	0.000372091	0.0021691	0.0172167	0.00456737	0.684032	0.674339	0.415861	2.71898	2.75009
310	2009-12-06	0.275	66.1667	100	1.25586	0.0843443	0.00947368	0.03072	0.00557617	0.048501	0.00178419	2.6834	5.10346	2.38129	3.01991	3.06231
311	2009-12-09	2.94583	89.875	100	0.697584	0.267738	0.0153119	0.0029069	0.00185322	0.0184669	0	1.19021	0.807177	0.679312	2.95389	2.99104
312	2009-12-12	-1.93333	64.9167	100	1.16769	0.425182	0.109787	0.02546	0.00495968	0.0364078	0.0138229	1.28822	3.39421	1.34193	3.09263	3.20129
313	2009-12-15	1.35417	80.875	100	0.888293	0.0751367	0.0151837	0.00857104	0.00301897	0.0237705	0	1.20916	1.23338	0.799365	2.98643	3.02501
314	2009-12-18	-4.47917	81.25	100	1.87179	0.364729	0.0582652	0.0187537	0.00514331	0.0271766	0	0.467486	1.83197	0.643293	3.74152	3.81072
315	2009-12-21	-2.30417	70.75	100	1.21799	0.529115	0.025269	0.0112185	0.00261457	0.03191	0	0.735012	0.710421	0.449507	3.18068	3.24679
316	2009-12-24	-3.18333	89.25	100	0.938894	0.511549	0.0148309	0	0.000810104	0.0127375	0	0.484079	1.21979	0.545806	3.48706	3.51641
317	2009-12-27	1.19167	83.6667	100	0.672172	0.172742	0.0339964	0.0245504	0.00157264	0.0266661	0.0066531	1.63242	2.07434	1.18676	2.92186	2.9804
318	2009-12-30	-3.04583	70.625	100	0.359836	0.327781	0.150732	0.0412125	0.00304922	0.0409447	0.176346	1.13651	2.63396	1.14666	2.68048	2.93716
319	2010-01-11	-4.66667	72.9167	100	1.54286	0.406451	0.173653	0.0956598	0.00180551	0.0401315	0.268696	2.35059	8.56383	3.16313	3.49416	3.5946
320	2010-01-14	0.6875	79.1667	100	1.26135	0.250436	0.0895576	0.0634546	0.00382183	0.0510842	0.131208	4.72736	13.1728	5.38412	3.13246	3.20158
321	2010-01-17	1.65833	91.4583	100	0.498391	0.25994	0.0291072	0.0203723	0	0.0772425	0.0519876	6.47456	5.24601	3.68791	2.63517	2.77892
322	2010-01-20	-3.19167	74.7917	100	1.32535	0.196974	0.260399	0.00541656	0.00933838	0.0727295	0.170584	0.78349	0.750538	0.375079	3.30022	3.61359
323	2010-01-23	-0.791667	83.25	100	1.38395	0.436913	0.0804914	0.0330663	0.00165316	0.0680658	0.122554	0.898386	2.30896	1.00673	3.39146	3.48677
324	2010-01-26	0.545833	80	100	0.814639	0.115054	0.118223	0.0523429	0.00573173	0.129314	0.115692	1.96136	3.69434	1.61488	2.92382	3.10311
325	2010-01-29	-12.5375	60.3333	100	0.726667	0.428078	0.387439	0.0410164	0.0102184	0.0635654	0.33109	0.483518	0.632607	0.230034	3.35646
326	2010-02-01	-5.27917	62.875	100	1.13885	0.281621	0.274167	0.0484338	0.00922119	0.0730005	0.122859	1.08181	0.987328	0.554073	3.18265	3.49969
327	2010-02-04	-2.55833	65.9167	100	1.64413	0.355818	0.231354	0.27105	0.00957094	0.0705386	0.263141	0.881051	1.52591	0.658254	3.29611	3.62559
328	2010-02-07	-6.88333	62.9167	100	0.69133	0.186603	0.245565	0.0694123	0.00524217	0.0378027	0.172065	0.331205	0.343104	0.145498	3.09609	4.51427
329	2010-02-10	-3.9125	79.8333	100	0.931472	0.526404	0.0740773	0.0272805	0.00140111	0.0199229	0	0.271958	0.589682	0.20193	3.30621	3.45151
330	2010-02-13	-4.7375	70.9167	100	0.86829	0.337596	0.176131	0.0285225	0.00230161	0.0431197	0.0598214	0.685245	0.74427	0.413194	3.17127	3.4163
331	2010-02-25	-4.81667	85.5833	100	0.852248	0.271245	0.0765933	0.043352	0.0106176	0.0235533	0.131227	0.56873	1.17148	0.605127	3.49712	3.62551
332	2010-02-28	2.45417	84.75	100	0.712685	0.0763731	0.0296044	0.0103846	0.00392853	0.0116806	0.0213111	0.564825	0.4194	0.355584	2.89437	2.96303
333	2010-03-03	2.1125	52.8333	100	1.48132	0.303599	0.0498992	0.0101654	0.00988179	0.116117	0.04863	0.307991	0.490581	0.205462	2.82642
334	2010-03-06	3.03333	52	100	1.68618	0.278838	0.140703	0.0256823	0.0138591	0.117266	0.0691585	1.16831	1.10908	0.675405	2.75334
335	2010-03-09	6.12083	62.625	100	3.87863	0.71041	0.0941404	0.0542479	0.0282367	0.265901	0.00954288	4.26876	15.5964	5.41389	3.1072	3.18806
336	2010-03-12	6.20417	86.625	100	1.57693	0.881537	0.0440616	0.054257	0.00955105	0.117748	0.0142998	2.4144	2.32909	1.47276	2.99117	3.08133
337	2010-03-15	8.07083	63.3333	100	1.74838	0.182537	0.0638343	0.00688497	0.00875966	0.10976	0.0293459	0.439642	0.276189	0.209764	2.53703	3.03302
338	2010-03-18	12.1	41.8333	100	4.33414	0.405494	0.0604677	0.032232	0.0232285	0.332052	0.0264798	1.27003	1.9086	0.865296	2.57851
339	2010-03-21	2.64583	80.3333	100	3.26515	0.150568	0.0404239	0.0101507	0.00506801	0.0620363	0.0288911	0.617475	1.49474	0.672609	3.52758	3.59893
340	2010-03-24	7.2875	54.375	100	2.26151	0.160377	0.0531903	0.0313165	0.014283	0.126564	0.0422312	0.764248	0.967401	0.512617	2.69686
341	2010-03-27	0.495833	52.4167	100	0.131723	0	0.0325174	0.0223117	0.00093683	0.0104504	0.0311445	0.0188961	0	0.0027	1.62384
342	2010-04-02	16.525	55.75	100	4.94147	1.11635	0.0730737	0.0897031	0.0260384	0.205401	0.0224949	4.18037	2.62941	2.0265	2.47591
343	2010-04-05	16.7708	45.9583	100	4.34498	0.615498	0.0461718	0.0205013	0.0182508	0.13154	0.0295121	1.49617	1.03094	0.809854	2.27466
344	2010-04-08	9.15833	93.8333	100	1.62235	0.275515	0.0233278	0.00772765	0.00480277	0.042147	0.0182007	1.24839	1.31581	0.846194	3.16314	3.21117
345	2010-04-11	10.8833	54.8333	100	1.8324	0.285241	0.0261278	0.018382	0.0077213	0.0597153	0.0100008	1.47204	3.12183	1.44781	2.50567
346	2010-04-14	11.7667	34.9583	100	2.9998	0.345513	0.0420893	0.0575694	0.0245077	0.295769	0.0111224	1.12132	0.663628	0.50544	2.26784
347	2010-04-17	5.92917	70.0417	100	1.52624	0.123969	0.0110531	0.0187321	0.00531764	0.120037	0.00772776	0.090523	0.232014	0.0542943	2.77474	4.73906
348	2010-04-20	12.9083	47.125	100	2.31332	0.311079	0.0361846	0.0375088	0.0207885	0.240678	0.00304393	0.821979	1.29384	0.655156	2.29126
349	2010-04-23	8.9625	48.0417	100	1.42119	0.35827	0.0280451	0.0342296	0.0164491	0.242032	0.00575225	0.859729	0.790368	0.515539	2.28594
350	2010-04-29	13.2667	34.0417	100	3.13271	0.612436	0.047965	0.0310672	0.0239191	0.355174	0.00946825	0.807071	0.536611	0.412294	2.2075
351	2010-05-02	18.4083	83.8333	100	6.53413	1.0738	0.0349683	0.052505	0.0112642	0.25318	0.00851173	2.27337	2.65794	1.43224	2.93859	3.02818
352	2010-05-05	17.3667	66.9167	100	3.98869	0.931737	0.0286421	0.0343739	0.0149021	0.246664	0.0182075	2.4242	2.41508	1.44091	2.50162	2.61573
353	2010-05-08	6.65833	85.25	100	1.69451	0.0968329	0.00148033	0.002801	0	0	0.00295193	0.390095	0.316712	0.206242	3.01554	3.02306
354	2010-05-11	7.89583	65.5417	101.204	1.7872	0.656131	0.0176739	0.0127698	0.00766191	0.0488351	0.0095524	1.1451	0.649229	0.543037	2.63024	2.69837
355	2010-05-14	14.6708	70.7917	100.295	0.487928	0.044378	0.00969763	0.011273	0.00432351	0.0210966	0.00989488	0.238137	0.544738	0.207424	1.73169	1.92113
356	2010-05-17	16.4583	39.75	100.807	2.66937	0.329056	0.0423132	0.0335535	0.0133968	0.102804	0.0116163	0.764591	0.380316	0.336282	1.96131
357	2010-05-20	20.7958	52.5833	100.213	4.85823	0.788579	0.0442671	0.0484616	0.0374265	0.448857	0.0120285	2.02034	0.677272	0.726492	2.11436
358	2010-05-23	19.2375	81.0833	100.724	2.49143	0.475524	0.0290237	0.056558	0.0184861	0.319005	0.0109004	4.79689	1.51787	1.85976	2.29735	2.41466
359	2010-05-26	25.875	61.0833	100.21	4.49449	1.98371	0.0432875	0.056045	0.0246346	0.162696	0.0027203	4.75959	0.814008	1.6668	1.90265	1.96567
360	2010-05-29	22.4875	55.5833	100.018	2.69548	0.357358	0.0204587	0.0355516	0.0150402	0.0985428	0.00833353	0.527206	0.230203	0.193249	1.7872
361	2010-06-01	23.1833	62.7083	99.5867	4.24961	0.368201	0.0284845	0.0455821	0.0101261	0.0768002	0	1.86045	1.77427	1.12051	2.09159	2.16204
362	2010-06-04	19.2	78.2083	99.6162	2.86291	0.172431	0.0263819	0.0277709	0.00631152	0.0599898	0	1.27897	0.584044	0.586958	2.32282	2.39979
363	2010-06-07	15.7083	61.5833	100.05	1.22139	0.269431	0.0220459	0.0212093	0.00365507	0.0335546	0	0.425246	0.0781613	0.156692	1.8599	2.02772
364	2010-06-10	17.275	76.1667	99.875	1.72136	0.991897	0.0187611	0.0143365	0.00551722	0.0419517	0	0.556864	0.836051	0.395567	2.23584	2.36168
365	2010-06-13	18.8208	86.4583	100.03	3.13526	0.482519	0.0266761	0.0202203	0.00336362	0.0381226	0	0.856597	0.315253	0.404738	3.28352	2.66889
366	2010-06-16	18.8708	78.75	99.785	2.17175	0.450234	0.0266564	0.0230474	0.00604209	0.0495869	0	1.03899	0.298996	0.410257	2.21473	2.3002
367	2010-06-19	24	75.9583	99.8058	3.22429	1.01581	0.042932	0.0482323	0.0104582	0.0628418	0.0158479	4.02982	0.907552	1.45189	2.05956	2.09871
368	2010-06-22	21.3417	85.0833	100.143	2.92987	1.18535	0.0373391	0.0267487	0.00781843	0.0598025	0	2.19917	0.54634	0.920128	2.38097	2.43527
369	2010-07-01	17.8792	54.75	101.096	2.63766	0.0834843	0.0438067	0.193478	0.0161785	0.0452373	0.0662046	0.406124	0.183639	0.113869	1.9979
370	2010-07-04	24.275	63.9583	100.166	3.65638	1.19117	0.0368636	0.287528	0.0403099	0.148565	0	9.41884	1.05949	3.56977	1.93608	2.00145
371	2010-07-07	27.7083	70	100.415	4.19533	1.82313	0.0946678	0.183584	0.0423986	0.172121	0.00216621	10.1093	1.53208	3.94115	1.91862	1.97851
372	2010-07-10	23.7458	57.5417	99.9783	2.22395	0.445731	0.00829396	0.0254459	0.00906541	0.0412965	0.00268345	0.537751	0.111354	0.238828	1.66823
373	2010-07-13	24.925	81.4583	99.7175	1.83857	1.20226	0.0253703	0.023303	0.0245763	0.151152	0.00172068	8.83579	1.52583	3.38526	1.88408	1.93721
374	2010-07-16	26.8208	67	99.7142	3.63743	0.666268	0.00780482	0.0395681	0.0150403	0.0887455	0	2.46808	0.236321	0.814226	1.82668	1.87815
375	2010-07-19	23.5917	77.8333	99.6404	2.14495	0.534384	0.0312023	0.0283341	0.0135852	0.0936224	0.0123722	1.81455	0.723463	0.747257	1.95298	2.04257
376	2010-07-22	24.5042	65.4167	100.226	2.66199	0.719415	0.0220901	0.0192306	0.0208651	0.126613	0.00649014	0.799788	0.169852	0.277438	1.79327	2.08099
377	2010-07-25	22.6792	69.125	100.022	2.56789	0.346764	0.00693881	0.00952056	0.00958525	0.0614471	0	0.421419	0.110785	0.129663	1.91558	2.13928
378	2010-07-28	23.8208	84.2083	99.8212	3.51829	0.858113	0.0127867	0.0451113	0.0230699	0.160506	0	4.1934	0.860715	1.48889	2.27075	2.33589
379	2010-07-31	20.4292	69.7917	100.094	1.97994	0.483475	0.0299324	0.0229044	0.0100832	0.0801394	0.00501105	0.648905	0.27344	0.29037	1.94533	2.17659
380	2010-08-03	25.6458	82.9583	99.9804	2.43735	0.857616	0.0347453	0.0381143	0.0192741	0.149307	0.00906755	12.2898	1.71418	4.65831	1.99035	2.03179
381	2010-08-06	20.3583	61.0417	99.6233	1.66354	0.278235	0.0105401	0.0392908	0.0113934	0.105487	0	0.251758	0.143475	0.0774284	1.74122	3.48693
382	2010-08-09	23.2167	89.6667	100.009	4.51658	0.732415	0.0184961	0.0549074	0.0194292	0.202659	0	5.78866	3.36185	3.00908	2.64422	2.69729
383	2010-08-12	24.0458	78.875	99.8312	2.2254	0.426821	0.0195341	0.0386021	0.0119947	0.119147	0	0.728316	0.257939	0.291066	1.95153	2.25159
384	2010-08-15	25.0583	87.0417	99.6429	2.41795	0.389924	0.0291496	0.0514276	0.0136614	0.10683	0	4.57612	0.491655	1.46596	2.07721	2.13415
385	2010-08-18	20.5417	73.0417	100.413	1.92765	0.418546	0.00176303	0.0291372	0.0073817	0.0450751	0	0.746635	0.298592	0.331369	1.97733	2.06523
386	2010-08-21	21.4542	83.5833	99.9225	2.27483	0.405732	0.0495313	0.0589495	0.00829049	0.0651434	0.0205528	0.917676	0.411983	0.457866	2.21861	2.39503
387	2010-08-24	20.0917	81.4167	100.505	1.71945	0.138703	0	0.00807698	0.00671749	0.0458322	0.0262435	0.407439	0.0659229	0.0959389	2.06991	2.21495
388	2010-08-27	18.5542	72.75	100.728	2.26373	0.266518	0	0.0284069	0.0167367	0.0885968	0.031643	1.28566	0.413275	0.486802	2.13949	2.23893
389	2010-08-30	26.5125	71.75	100.944	4.15564	1.17765	0.0167632	0.0763669	0.0252137	0.133451	0.039008	9.91885	1.53645	3.48986	1.95874	1.99253
390	2010-09-02	25.3375	81.5417	99.8654	3.55759	0.466305	0.0115687	0.00828784	0.015674	0.0690362	0.0355221	4.2933	0.599899	1.44364	2.12349	2.15132
391	2010-09-05	15.5042	68.625	99.9204	2.18771	0.13469	0	0	0.0063281	0.00179076	0.0331215	0.207833	0.117849	0.0259819	2.20888	2.25311
392	2010-09-08	17.4042	73.2917	99.6533	2.48734	0.11819	0	0	0.00760391	0.0448743	0.0284369	0.296052	0.142425	0.0560169	2.23295	2.42939
393	2010-09-14	15.5292	65.875	100.21	2.7292	0.116431	0	0.00126311	0.00842106	0.0454666	0.0336667	0.23142	0.143146	0.0325713	2.27035	2.58008
394	2010-09-17	13.175	77.0833	100.564	1.69613	0.202833	0	0	0.00709673	0.0464001	0.030862	0.371022	0.57931	0.214993	2.44564	2.58668
395	2010-09-20	13.85	69.5	100.832	1.73887	0.363716	0.00040747	0.0101215	0.0108009	0.0713329	0.0389591	0.666362	0.411538	0.266511	2.25154	2.3945
396	2010-09-23	16.0792	88.875	100.615	2.47454	0.39303	0	0.00138011	0.00951245	0.0687168	0.0285512	0.459865	0.443617	0.191018	2.74018	2.87378
397	2010-09-26	12.5125	77.4583	100.534	1.53363	0.189863	0.0054934	0	0.00413424	0.0181546	0.0181195	0.347883	0.19723	0.0883991	2.37476	2.44764
398	2010-09-29	15.2875	85.8333	99.835	2.12463	0.255751	0.0136387	0.00832892	0.0109521	0.0633412	0.0241924	2.20062	0.840001	0.955345	2.58474	2.63173
399	2010-10-02	10.6417	76.7917	100.464	1.77875	0.0377494	0.0170086	0	0.00392149	0.0105475	0.0215317	0.205907	0.319703	0.0722881	2.56895	2.70623
400	2010-10-05	11.0625	87.3333	100.841	2.84456	0.0842956	0.0284534	0.00537771	0.00904275	0.0471168	0.0324665	0.20553	0.470967	0.0858291	3.08039	3.29929
401	2010-10-08	16.6542	63.5833	99.91	4.65658	0.323011	0.0209934	0.017414	0.0212951	0.10602	0.0206612	0.541279	0.41101	0.192487	2.4556	2.82956
402	2010-10-11	12.4458	82	99.6925	2.3743	0.280048	0.0165452	0.0309504	0.012832	0.0671169	0.0221657	0.834592	0.573693	0.389314	2.73932	2.85028
403	2010-10-14	10.075	91.875	99.7375	1.58228	0	0.00915215	0.00825718	0.00596686	0.0220896	0.0235959	0.376347	0.704908	0.232841	3.01481	3.08009
404	2010-10-17	12.3542	62.75	99.9517	2.78731	0.194227	0.014977	0.0142977	0.00979376	0.0452344	0.0214459	0.655621	0.948911	0.430729	2.55492	2.66709
405	2010-10-20	11.7375	67.375	99.2167	4.26353	0.326556	0.0129448	0.0224566	0.021764	0.116287	0.018036	1.38655	1.43806	0.797084	2.855	2.94625
406	2010-10-23	10.4167	78.5	100.491	3.75371	0.257324	0.0171881	0.0195745	0.0135147	0.070779	0.0305943	0.8327	2.52738	0.966771	3.10391	3.16022
407	2010-10-26	15.9792	92.0833	98.8796	2.39145	0.472135	0.0129154	0.0986074	0.0169568	0.0859298	0.0411485	2.24858	1.42929	1.21781	2.84325	2.91884
408	2010-10-29	7.37083	69.1667	100.5	1.85755	0.0503083	0	0.00375531	0.00817749	0.032197	0.0437421	0.224293	0.178788	0.0244512	2.63682	2.84126
409	2010-11-01	3.3	61.4583	101.721	1.19729	0.0197371	0	0.00654814	0.00996084	0.0568145	0.0502626	0.312013	0.357616	0.0816239	2.64497	2.86626
410	2010-11-04	7.24167	86.4583	99.1696	1.99846	0.217417	0	0.0425417	0.0134301	0.0947554	0.0530623	1.25767	5.43197	2.09205	3.18466	3.2361
411	2010-11-07	5.7375	68	101.182	2.16875	0.0540264	0.00740559	0.0527785	0.0131815	0.069703	0.0359735	1.09233	2.38593	1.05557	2.98882	3.05955
412	2010-11-10	7.20417	67.7917	101.26	3.63539	0.0159402	0.02223	0.00639921	0.0161561	0.0684104	0.0479475	0.551508	1.11663	0.331527	3.09236	3.20669
413	2010-11-13	7.45833	89.3333	100.848	3.75529	0.269175	0.0270504	0.0505761	0.0194218	0.0819869	0.0445098	0.956384	3.61291	1.4676	3.51159	3.57207
414	2010-11-16	8.53333	82.9583	99.7192	2.44953	0.757009	0.00995645	0.0434416	0.0205971	0.0920318	0.0706282	1.93522	4.24885	2.02425	3.08285	3.13422
415	2010-11-19	3.56667	72.375	100.841	1.35543	0.197892	0.0151007	0.0374443	0.0199459	0.0566299	0.0520425	0.654562	0.849789	0.325184	2.87722	3.00217
416	2010-11-22	12.0208	91.6667	100.078	2.31374	0.420958	0.0112108	0.0488569	0.0353533	0.0922143	0.0727791	3.12274	1.71263	1.70531	3.0289	3.09496
417	2010-11-25	4.42083	78.875	99.9513	1.18134	0.315666	0.0157191	0.0191792	0.0143204	0.0454067	0.0608186	0.465652	0.415685	0.12016	2.82489	2.95299
418	2010-11-28	2.41667	76.1667	101.15	1.57717	0.0405554	0.0270404	0.0523066	0.0158721	0.049994	0.0984958	1.54687	2.06297	1.2622	3.14343	3.208
419	2010-12-01	4.03333	88	99.2412	1.23416	0.0247093	0.0210506	0.00884841	0.00567949	0.0155484	0.00392167	1.77707	1.75703	1.11756	3.1081	3.13773
420	2010-12-04	-2.32083	76.2083	100.24	0.921412	0.132076	0.0785973	0.0072317	0	0	0.0199215	0.292658	0.481264	0.113106	3.13103	3.26081
421	2010-12-07	-3.87083	74.375	99.2596	1.46159	0.0266135	0.175653	0.00334228	0.00572648	0.000162099	0.177219	0.242872	0.212917	0.0281822	3.3806	4.34599
422	2010-12-10	0.695833	80.2917	100.425	0.51125	0.266184	0.0698701	0.0460918	0.00990637	0.043904	0.0664329	2.50732	4.07451	1.97649	2.66797	2.80467
423	2010-12-13	-10.5625	75.9583	98.5796	0.592919	0.0749965	0.185628	0.0114918	0.00886462	0.0094423	0.103161	0.444538	0.230617	0.0486951	3.28702
424	2010-12-16	-3.75	80.3333	99.2975	1.36453	0.268003	0.0522189	0.0453317	0.0113336	0.0432088	0.0538108	0.868745	2.68414	1.02701	3.51862	3.60025
425	2010-12-19	-3.5625	79.375	100.344	0.429784	0.291768	0.0652971	0.0367647	0.0093057	0.0353518	0.00303822	2.33475	10.2802	3.43238	2.28066	2.52587
426	2010-12-22	-4.42917	80.0417	100.461	0.933827	0.206543	0.0660504	0.0046565	0.00355671	0	0.0319706	0.475762	0.56089	0.202045	3.29793	3.38418
427	2010-12-25	-5.22917	74.75	100.724	0.667233	0.111414	0.0470285	0.000699001	0	0	0.0167152	0.14692	0.303024	0.0518747	3.18023	3.30757
428	2010-12-28	-1.99167	78.8333	100.021	0.866158	0.196427	0.0635087	0.03688	0.0070764	0.0472618	0.0352994	3.25255	5.61671	2.52559	2.98136	3.08101
429	2011-01-09	-6.23333	75.75	100.503	0.653832	0.172827	0.0672592	0.0430473	0.000601944	0.00809927	0.0146801	0.84091	1.06251	0.613374	3.24671	3.34671
430	2011-01-12	-7.95	81.9583	100.217	0.64977	0.235412	0.0341174	0.0162067	0	0	0	0.141014	0.341135	0.0819874	3.45812	3.55499
431	2011-01-15	-2.98333	86.9583	99.9096	0.218565	0.409453	0.041545	0.0859344	0.00334272	0.0335882	0.177537	3.81545	6.56135	3.14442	2.16555	2.44481
432	2011-01-18	1.81667	87.1667	99.5313	0.573194	0.9872	0.0496705	0.0814199	0.00162058	0.0134829	0.139866	2.47717	5.11776	2.36823	2.70319	2.80729
433	2011-01-21	-7.03333	75.9167	99.4167	0.622836	0.145289	0.109956	0.0342926	0.00266783	0.00874127	0.121088	1.45239	2.31581	1.18918	3.28376	3.39939
434	2011-01-24	-12.1042	73.4583	101.217	0.615228	0.557885	0.336377	0.05318	0.0276878	0.00802675	0.439803	1.34504	2.09779	1.04512	3.45518
435	2011-01-27	-1.07917	78	99.6867	1.31698	0.322542	0.058394	0.0475524	0.00785271	0.0185906	0	2.77746	4.58271	2.18141	3.21311	3.26644
436	2011-01-30	-6.425	70.2083	100.881	1.19376	0.307114	0.145601	0.0507077	0.00776963	0.0285874	0.0132726	1.52457	1.13579	0.802752	3.37088	3.50414
437	2011-02-02	-8.525	88.25	99.8833	0.554537	0.336619	0	0.028387	0.00863973	0.0357356	0	0.502275	0.405618	0.282476	3.49598	3.59811
438	2011-02-05	-2.46667	72.8333	99.2267	0.479194	0.646007	0.0158848	0.0563212	0.0121259	0.0484279	0.0895639	2.44026	7.80632	2.90111	2.41737	2.58025
439	2011-02-08	-11.2083	66.4583	100.242	0.638431	0.161024	0.205168	0.0311365	0.00734517	0.0432648	0.187163	1.1465	0.477227	0.509621	3.3072
440	2011-02-11	-8.57083	63.3333	100.204	0.422946	1.09881	0.292406	0.0835159	0.0172712	0.119046	0.438287	2.59646	12.4009	4.06587	1.64208	2.50492
441	2011-02-14	1.80833	70.0417	98.925	1.18542	0.332248	0.00207842	0.0327448	0.00365682	0.0332232	0.00194676	1.11816	1.29861	0.794479	2.93113	2.97794
442	2011-02-17	6.125	82.1667	99.9896	2.32689	0.928015	0.0133359	0.102501	0.0111598	0.0749777	0.122858	3.61109	9.62661	3.80606	3.09896	3.1445
443	2011-02-20	-5.58333	67.375	101.096	0.552395	0.564918	0.0581988	0.0170077	0.00958575	0.0315653	0.0401345	0.615418	0.736719	0.411199	2.92773	3.10643
444	2011-02-23	-3.04167	67	101.359	1.54766	0.587502	0.233831	0.0355796	0.0161163	0.0663197	0.20392	0.829191	2.44194	0.886202	3.32804	3.54169
445	2011-02-26	-3.89583	84.5	100.478	0.483175	0.982364	0.00853699	0.0414732	0.00897553	0.0409056	0.0607508	1.8912	3.20099	1.58009	2.77079	2.91302
446	2011-03-01	-1.52917	73.75	100.953	0.645263	0.699413	0.00378417	0.0393498	0.0131908	0.0565559	0.0452725	2.22337	2.56618	1.50255	2.76348	2.86208
447	2011-03-04	1.61667	70.9583	101.227	1.27756	0.633686	0.0282306	0.0508095	0.0140063	0.0801661	0.0121988	1.07244	2.93379	1.16285	2.99415	3.09046
448	2011-03-07	-5.0125	56.625	101.176	1.11376	0.408306	0.522189	0.0273484	0.020608	0.0790891	0.26974	0.748192	0.908659	0.426537	3.08519
449	2011-03-10	4.1625	99.375	99.7208	1.19363	0.839627	0.0162303	0.0122207	0.0055748	0.0262794	0.0972958	0.46898	1.21109	0.594878	4.14971	4.19929
450	2011-03-13	1.28333	81.125	100.598	1.43775	0.237558	0	0.0146042	0.0105765	0.0374763	0.00510748	1.28614	0.507579	0.623475	3.1424	3.18537
451	2011-03-16	5.77917	85.875	100.346	1.11919	0.201299	0.0355193	0.0463424	0.00671152	0.0447305	0.00706406	1.95207	3.0472	1.58276	2.93931	2.99802
452	2011-03-19	1.78333	62.75	101.651	0.698625	0.257123	0.0691397	0.0283191	0.0100995	0.0362659	0	1.40816	0.323805	0.64695	2.50038	2.62913
453	2011-03-22	4.08333	68.5833	100.53	0.941816	0.319802	0.039595	0.0238522	0.00757978	0.0523988	0.0057317	0.978696	0.377705	0.531685	2.61747	2.73375
454	2011-03-25	-4.50417	55.75	100.476	0.887512	0.231394	0.190211	0.0367722	0.0124343	0.068286	0.102548	1.08503	0.968586	0.654986	2.95209
455	2011-03-28	-1.54167	50.8333	100.738	1.21422	0.26268	0.0934825	0.0363496	0.0102949	0.0443576	0.0488925	0.658832	0.504685	0.408099	2.84569
456	2011-03-31	2.675	89.9583	99.6192	1.19989	0.345855	0.037717	0.0293606	0.00588806	0.0393617	0.01708	1.59924	2.14566	1.25788	3.25938	3.3157
457	2011-04-03	5.21667	68.3333	99.98	1.38725	0.52295	0.0322814	0.0385688	0.00613671	0.0289706	0	1.71401	1.8239	1.24774	2.78779	2.83856
458	2011-04-06	3.9125	77.7083	99.875	2.17669	0.468632	0.0517978	0.0557177	0.015059	0.0917882	0.0360341	2.11652	2.92882	1.53886	3.16329	3.23503
459	2011-04-09	8.48333	63.375	100.536	1.92586	0.678013	0.0623767	0.058643	0.0162857	0.134364	0.0262995	1.77044	4.39812	1.83321	2.71864	2.81935
460	2011-04-12	8.34167	53.5833	100.253	1.58772	0.279475	0.0325501	0.0212099	0.00792615	0.0673103	0	0.643931	0.354232	0.355187	2.3825
461	2011-04-15	3.4375	41.6667	101.55	0.818713	0.241957	0.0723912	0.0163036	0.015242	0.0830384	0.00871311	0.824112	0.255994	0.375437	2.23331
462	2011-04-18	2.3125	72.875	100.128	1.26232	0.255268	0.0340157	0.0266636	0.0118347	0.0613624	0	1.60488	0.969617	0.84095	2.90073	2.98124
463	2011-04-21	5.1125	65.1667	101.126	0.941329	0.381913	0.0458848	0.0201215	0.00821003	0.0747223	0.0208508	0.945657	0.352481	0.45694	2.48458	2.64419
464	2011-04-24	8.85833	71.125	100.38	1.37379	0.274403	0.0176763	0.0164285	0.00131637	0	0	0.962547	1.72539	0.909238	2.65985	2.68076
465	2011-04-27	14.7708	88.5	99.0754	2.95619	0.354822	0.0385923	0.0234666	0.00856503	0.0215813	0.00116465	1.52681	2.21818	1.18268	2.92379	2.95863
466	2011-04-30	10.2792	61.8333	100.86	1.53574	0.135483	0.0228897	0.00875847	0.00359493	0	0	0.445328	0.280774	0.260696	2.31021	2.37251
467	2011-05-03	7.2375	86.0417	100.707	1.35734	0.263445	0.01806	0.0084976	0.00421636	0.000329331	0	1.13383	0.421798	0.534706	2.86675	2.89015
468	2011-05-06	11.9292	67.4583	99.6975	4.15116	0.338732	0.0209191	0.0390594	0.0184704	0.107889	0.0290137	1.73625	1.73555	1.09969	2.8403	2.91709
469	2011-05-09	13.8042	51.2083	100.693	2.75436	0.45269	0.0247305	0.0194814	0.00832663	0.0912271	0.0297753	0.402306	0.538754	0.306354	2.28382
470	2011-05-12	14.6375	69.8333	100.149	3.25258	0.384537	0.0649123	0.0447852	0.0125715	0.0891412	0.0450096	0.720898	1.05013	0.548746	2.60448	2.81355
471	2011-05-15	10.3333	89	99.3833	0.897392	0.156191	0.0382146	0.0227116	0.000669436	0.0186594	0.0443555	0.422267	0.135187	0.208993	2.58203	2.73292
472	2011-05-18	14.6958	94.0833	100.054	1.68196	0.260942	0.0311629	0.0329294	0.0036601	0.0365939	0.0442839	0.72914	0.636318	0.459879	2.88697	2.9769
473	2011-05-21	20.9917	70.2917	100.27	3.18346	0.30929	0.0372442	0.0585408	0.0105067	0.0658155	0.0530038	1.16211	0.361099	0.523261	2.13336	2.25102
474	2011-05-24	17.1	80.0417	99.4758	2.74141	0.173482	0.0128652	0.0398632	0.0087664	0.065875	0.0376411	0.637757	0.974432	0.492322	2.52443	2.67758
475	2011-05-27	12.6083	97.5	100.103	1.73299	0.136857	0.0186621	0.0200709	0.00304996	0.0501137	0.0497221	0.328379	0.558748	0.275975	3.34605	3.47781
476	2011-05-30	20.6125	84.0417	100.667	2.62456	0.751873	0.0399142	0.0670661	0.010808	0.0907005	0.0420946	6.47766	4.56783	3.52979	2.41221	2.44911
477	2011-06-02	15.325	52.5	100.594	1.54463	0.0868633	0.0340868	0.0508453	0.0149004	0.135147	0.0612862	0.353281	0.134646	0.163197	1.88916
478	2011-06-05	20.725	65.5	100.347	2.77556	0.768927	0.0796997	0.0757506	0.00960887	0.0670032	0.079086	1.66277	2.72145	1.36254	2.15827	2.27679
479	2011-06-08	25.4542	75.9167	99.6604	5.52117	1.5468	0.649679	0.121737	0.0239211	0.147902	0.064609	6.28551	2.37056	2.79524	2.76208	2.4268
480	2011-06-11	17.9292	74.4167	99.8942	2.95138	0.393501	0.0359678	0.0662131	0.0109157	0.107973	0.0273915	1.28741	1.13985	0.808383	2.40175	2.54513
481	2011-06-14	16.4	74.3333	100.425	2.13435		0.0127855	0.0254153	0.0115226	0.104609	0.0177094	0.343198	0.255215	0.159146	2.25213	3.10095
482	2011-06-20	19.925	51.5417	99.8892	2.41423	0.286611	0.0213342	0.0229009	0.00640244	0.0628502	0.024332	0.21055	0.149873	0.104621	1.83217
483	2011-06-23	20.7583	92.1667	99.0196	2.81672	0.799941	0.00807415	0.0298432	0.00477355	0.0410496	0.0163307	2.74944	0.432928	1.09481	2.61456	2.64377
484	2011-06-26	20.175	75.7083	100.142	2.48869	0.148977	0.0292782	0.0328184	0.00287321	0.0412124	0.0320992	0.313005	1.08653	0.407967	2.20888	2.53388
485	2011-06-29	18.7042	72.5	100.062	1.9272	0.323334	0.000673293	0.0154519	0.00288096	0.0384426	0.0103705	0.396344	0.0822722	0.158127	2.05249	2.16874
486	2011-07-02	22.175	69.5	100.113	3.52729	1.86543	0.0257658	0.420848	0.0384607	0.069183	0.0173607	2.73499	0.781714	0.973669	2.10842	2.26153
487	2011-07-05	23.3167	59.1667	100.023	3.62568	0.702909	0.018271	0.119995	0.0335525	0.173582	0.0128261	2.4908	0.393511	0.965242	1.92246
488	2011-07-08	23.4625	62.7083	99.765	2.89766	0.899645	0.0528645	0.0749077	0.0112709	0.0991884	0.039226	1.13071	0.302014	0.487275	1.86432	2.05452
489	2011-07-11	26.625	69.125	99.5492	3.86645	1.15809	0.0347423	0.0768397	0.0259413	0.159999	0.000317588	8.01588	0.755134	2.87122	1.89402	1.93982
490	2011-07-14	22.1958	56.2917	100.543	2.18391	0.23079	0.0646323	0.0342346	0.0190305	0.132283	0.00984279	0.24992	0.104257	0.0999197	1.71743
491	2011-07-17	28.0458	60.25	100.434	3.71259	1.01898	0.0368884	0.0756631	0.0199709	0.105131	0	7.84625	0.57052	2.80739	1.69825	1.73342
492	2011-07-20	27.7292	66.4583	99.5829	3.8962	1.34974	0.023574	0.0529031	0.0199968	0.125988	0	3.80033	0.653515	1.38087	1.81737	1.87226
493	2011-07-23	27.3583	74.5	99.9683	5.72854	0.943664	0.019075	0.0318364	0.0156178	0.0775321	0	2.888	0.900549	1.20977	2.13832	2.17897
494	2011-07-26	22.8	65.25	99.4221	2.87525	0.216959	0.00967275	0.0189924	0.0096102	0.0612697	0	0.398453	0.305712	0.222268	1.92254	2.19859
495	2011-07-29	25.2833	79.2083	99.8	4.11685	0.60009	0.0183499	0.0327104	0.00872742	0.0558568	0	2.04183	0.623052	0.805741	2.17224	2.21633
496	2011-08-01	27.1958	62.125	99.8975	3.17353	0.408338	0.0165142	0.0490509	0.0098612	0.0554115	0	1.62612	0.448085	0.636812	1.70355	1.76266
497	2011-08-04	22.4208	76.0833	100.094	2.84496	0.449367	0.0400138	0.0291438	0.0104984	0.0739536	0	0.949107	0.359845	0.429913	2.10229	2.24804
498	2011-08-07	24.3083	93.5833	99.1275	3.24422	0.463083	0.0398229	0.0322347	0.00615114	0.0289765	0	5.90318	2.9297	2.75173	2.58266	2.60341
499	2011-08-10	21.1542	73.6667	98.9308	2.65131	0.286855	0.00672946	0.0163824	0.0273854	0.118535	0	0.447283	0.261032	0.221171	2.09107	2.82645
500	2011-08-13	22.825	74.4167	100.025	3.27392	1.30403	0.0232956	0.0480944	0.0103708	0.0564399	0	4.2445	1.39459	1.79664	2.14046	2.17202
501	2011-08-16	23.5875	62.2083	100.12	2.12673	0.363473	0.00805471	0.0168963	0.00850987	0.0865225	0	0.253134	0.133535	0.105988	1.70442	3.06887
502	2011-08-19	23.95	61.1667	99.8696	3.17767	1.21632	0.0222251	0.0600653	0.022115	0.127968	0	2.68812	0.468318	0.939779	1.84609	1.92978
503	2011-08-22	18.5792	66.3333	100.019	1.92238	0.0475723	0.0131221	0.0164709	0.00322662	0.0536317	0	0.346951	0.0894778	0.122474	1.96144	2.2181
504	2011-08-25	22.2333	79.7917	99.5042	2.53812	0.286558	0.00388051	0.0280657	0.00305215	0.0385533	0	0.96658	0.556071	0.421647	2.13051	2.18453
505	2011-08-28	20.0625	67.5	99.3917	1.58429	0.0423672	0.00224575	0.0113533	0	0.021798	0	0.614453	0.0961531	0.215906	1.81462	1.85159
506	2011-08-31	21.7	72.4167	100.716	3.24286	0.886143	0.0299669	0.0400303	0.0120247	0.110147	0	4.26798	1.29312	1.83831	2.16485	2.21222
507	2011-09-03	25.375	85.7083	99.7983	5.53753	0.926818	0.344133	0.0806365	0.00544909	0.0469979	0	5.58095	3.50091	2.8028	2.50462	2.57733
508	2011-09-06	15.1667	78.7917	100.711	1.6467	0.0785385	0.029989	0.0250838	0.00142937	0.0374062	0	0.115763	0.118976	0.0559254	2.27996	3.63257
509	2011-09-09	20.4167	75.25	100.081	3.26935	0.191611	0.0359881	0.028001	0.00792623	0.100491	0	0.488554	0.313932	0.241164	2.24857	2.71632
510	2011-09-12	22.0542	80.9583	99.9671	3.13572	0.354975	0.0206513	0.0468042	0.00733604	0.0645847	0	5.55393	2.61551	2.64002	2.31546	2.3422
511	2011-09-15	12.1375	64.5417	100.673	1.66513	0	0.000636346	0.00779674	0	0.0209789	0	0.0553523	0.0846405	0.0361182	2.22483	3.36902
512	2011-09-18	15.2458	71.375	101.494	1.74224	0.106017	0.0166403	0.0266525	0.000492227	0.0225727	0	0.614041	0.274331	0.293964	2.19188	2.26498
513	2011-09-21	18.2625	94.2917	100.372	2.5216	0.786587	0.052479	0.0751374	0.0131098	0.100332	0.0351527	3.29822	3.01134	2.20403	2.88687	2.95079
514	2011-09-24	16.8208	83.9167	100.454	2.84924	0.335706	0.0430175	0.0576145	0.00617123	0.0414187	0.0201985	3.40954	1.9696	1.81665	2.63181	2.66802
515	2011-09-27	20.4458	88.4583	99.8079	2.38323	0.152617	0.0465005	0.0608024	0.0112314	0.0799824	0.0292755	2.69198	1.11946	1.29535	2.45367	2.52516
516	2011-09-30	13.9333	90.125	98.7808	1.24267	0	0.0218582	0.0406381	0.00515377	0.0398214	0.0142541	1.35361	1.2203	0.850318	2.63494	2.69798
517	2011-10-03	12.5083	95.375	100.405	1.62348	0.0201799	0.0158514	0.015822	0.00428458	0.0548737	0.00985205	0.171498	0.173137	0.0821591	3.05971	3.55511
518	2011-10-06	13.0833	65.5417	101.495	2.89517	0.133912	0.0487588	0.045406	0.0139451	0.131294	0.0201508	0.418062	0.463718	0.205889	2.48506	3.17285
519	2011-10-09	18.875	82.2917	101.483	3.94813	0.603428	0.0443017	0.0851816	0.011229	0.0555917	0.00837609	5.20056	4.83353	3.24048	2.65976	2.69005
520	2011-10-12	16.6	88.9583	100.213	2.39716	0.269682	0.0685747	0.0563632	0.0133786	0.0796396	0.0422861	1.02125	0.736681	0.573972	2.70134	2.8646
521	2011-10-18	11.3917	72.0417	99.5371	3.65748	0.159627	0.0377964	0.0533332	0.0213864	0.123926	0.0291066	1.01365	1.76059	0.8111	2.91141	3.03785
522	2011-10-21	9.27917	82.5833	99.5721	1.67625	0.00865182	0.0407878	0.0244213	0.00657396	0.0536412	0.0277002	0.341249	0.209933	0.166329	2.73357	3.10429
523	2011-10-24	11.8208	75.5417	99.8996	2.14817	0.232668	0.0471007	0.0529904	0.00854453	0.0580446	0.011581	1.88653	1.06764	0.996713	2.62166	2.69262
524	2011-10-27	3.975	79.7083	100.053	1.6165	0.0600674	0.0399705	0.0742891	0.0168674	0.078393	0.0412212	0.229833	0.33105	0.126579	3.07482	3.80667
525	2011-10-30	5.875	84.7917	100.952	1.76162	0.26781	0.033156	0.0596912	0.00410899	0.0307888	0.0483958	2.57332	3.19197	1.72631	3.05957	3.09937
526	2011-11-02	11.6625	76.3333	100.806	2.25474	0.257665	0.0139175	0.0886371	0.011316	0.0949062	0.0185652	3.24891	2.27648	1.73071	2.66831	2.72606
527	2011-11-05	5.20417	71.875	101.609	1.81555	0.134726	0	0.0256972	0.00113233	0.0255686	0	0.347686	0.305173	0.240698	2.91594	2.99439
528	2011-11-08	11.7792	93.2083	100.855	4.46141	0.109969	0.00549888	0.086099	0.0101321	0.0664472	0.100893	2.65538	9.69496	3.33348	3.43614	3.4629
529	2011-11-11	3.98333	74.8333	99.5812	1.92392	0.0515818	0	0.0277664	0.00849878	0.0605077	0	0.653675	0.877714	0.495246	3.09096	3.17175
530	2011-11-14	12.7667	83.5417	98.9375	3.6444	0.23407	0	0.0420617	0.0121701	0.0950759	0.00539712	1.17805	0.904282	0.641024	2.96257	3.04364
531	2011-11-17	2.52083	65.6667	100.145	2.34692	0.285021	0	0.0300994	0.0121487	0.0748599	0.00789653	1.24461	0.913239	0.713057	3.10008	3.17588
532	2011-11-20	9.425	73.9167	100.371	1.75254	0.169857	0	0.0293329	0.00476102	0.0179335	0	1.38506	0.601787	0.686974	2.62118	2.65059
533	2011-11-23	4.36667	80.9167	100.11	1.65449	0.280875	0	0.0311912	0.00847329	0.073708	0.00848027	0.506477	0.668076	0.34258	3.091	3.19878
534	2011-11-26	10.8125	76.4583	100.406	2.61458	0.377192	0.00893123	0.0613604	0.00748625	0.0519533	0.0228473	1.54067	1.05253	0.851359	2.79668	2.8502
535	2011-11-29	5.65833	97.7917	99.4942	0.889266	0.183901	0	0.0152702	0	0.0150708	0.00133415	0.162706	0.282332	0.1219	3.4782	3.53765
536	2011-12-02	2.5625	81.7083	101.418	1.26168	0.10038	0	0.0482313	0.00449854	0.0394382	0.027635	0.973167	3.70835	1.33675	3.12992	3.17215
537	2011-12-05	6.60417	96.5	100.879	1.92353	0.0360086	0	0.0314985	0.00645963	0.0576486	0.00528843	0.802758	1.14361	0.651017	3.60507	3.67392
538	2011-12-08	1.99167	66.25	100.35	1.38146	0.212656	0	0.0448538	0.0115971	0.0798687	0	1.04932	2.85804	1.14034	2.99217	3.07201
539	2011-12-11	0.0583333	60.2083	101.81	0.965212	0.517516	0.00718673	0.0587382	0.00667076	0.0448045	0.00130696	0.817699	3.13777	1.14789	2.88096	2.9596
540	2011-12-14	5.54167	83.7917	100.971	1.56344	0.189871	0.0625453	0.121025	0.00724437	0.0744148	0.131366	3.27159	11.1688	4.15802	3.01988	3.09123
541	2011-12-17	-3.89167	60.2917	101.101	0.664728	0.158446	0.0675183	0.02093	0.00591077	0.0508945	0.0700339	0.343254	0.278621	0.181603	2.86954	3.19535
542	2011-12-20	-0.779167	77.1667	100.736	1.19824	0.163013	0.0307259	0.0307339	0.00524588	0.0854255	0.0457496	0.63192	0.359883	0.362698	3.16062	3.31581
543	2011-12-23	-2.49583	77.7083	100.922	0.823125	0.165699	0.0706041	0.0258375	0.00690996	0.0302425	0.0407781	0.416051	0.406431	0.245132	3.12758	3.30941
544	2011-12-26	3.225	76.75	100.732	1.92368	0.38034	0.0169284	0.0256655	0	0.017976	0.035022	0.668518	0.545623	0.437887	3.14943	3.19099
545	2011-12-29	-4.9125	87.375	99.9425	0.841787	0.471061	0.0783981	0.0364253	0.00218787	0.0363519	0.113194	0.676068	1.89913	0.809628	3.49726	3.60856
546	2012-01-01	4.80833	87.8333	99.2754	0.662816	0.24226	0.0150236	0.0555936	0.00159567	0.0298471	0.0380351	1.84751	1.46428	1.12532	2.78489	2.84424
547	2012-01-04	-3.81667	71.2083	100.159	1.33451	0.22543	0.0763395	0.0589166	0.0109753	0.0789113	0.151597	1.3626	4.17434	1.64219	3.39298	3.49996
548	2012-01-07	5.05417	74.7083	99.5262	2.64186	0.156703	0.0477494	0.0668135	0.00342581	0.0537004	0.0406341	0.706658	3.15914	1.16747	3.24032	3.3071
549	2012-01-10	4.21667	67.0833	99.9571	1.85478	0.322994	0.0483894	0.0249718	0.00565943	0.0515279	0.0649881	0.39388	1.60688	0.610487	3.04665	3.15238
550	2012-01-13	-1.79583	86.5833	98.4021	0.428266	0.10164	0.0815052	0.0387848	0.00825051	0.0276553	0.0742385	1.4603	2.23553	1.18193	2.98815	3.1271
551	2012-01-16	0.175	77.0833	100.604	0.481227	0.821827	0.0512453	0.0527486	0.00212548	0.0259691	0.0994312	1.75923	2.26044	1.35087	2.64193	2.74797
552	2012-01-19	-3.34167	73.5	99.8075	0.543582	0.175022	0.0293423	0.0283196	0.00414444	0.0462403	0.0305391	1.10144	0.987229	0.709247	2.93545	3.0389
553	2012-01-22	-1.025	71.0417	101.095	0.683688	0.405622	0.145322	0.0408713	0.00725879	0.0313768	0.0447183	1.07935	1.12431	0.696944	2.82286	3.01254
554	2012-01-25	-0.579167	76.5	101.267	1.38928	0.229096	0.0678109	0.0356444	0.012293	0.0300942	0	1.34688	0.945134	0.726313	3.18321	3.26522
555	2012-02-03	2.225	79.1667	101.652	1.62718	0.353056	0.0497905	0.0707162	0.00899894	0.0443847	0.00772417	1.66703	3.25204	1.5542	3.19988	3.26261
556	2012-02-06	3.75833	71.375	100.261	1.61315	0.228857	0.0595752	0.0766334	0.0129844	0.0739434	0.0386438	1.68886	4.05136	1.77478	3.01854	3.10112
557	2012-02-09	0.529167	69.25	100.547	1.92369	0.250149	0.144483	0.0891698	0.0275722	0.150678	0.153163	1.07888	4.3162	1.53383	3.27791	3.44759
558	2012-02-12	-4.80417	73.7917	100.04	0.967348	0.163951	0.0468006	0.0231942	0.014721	0.0244389	0	0.521784	0.414854	0.23657	3.25036	3.38474
559	2012-02-15	2.47083	82.9583	100.759	0.698958	0.186678	0.0262724	0.0899941	0.0151747	0.0400932	0.10855	3.74751	8.75349	3.76667	2.79849	2.88826
560	2012-02-18	1.18333	82.75	100.163	1.44335	0.402608	0.0381722	0.0411315	0.00716299	0.0330762	0.0315441	1.40687	2.48898	1.27857	3.2714	3.32381
561	2012-02-21	2.45833	80.8333	99.8988	0.968574	0.698295	0.0537066	0.0623952	0.0101217	0.0635371	0.071194	1.34412	1.72188	1.03199	2.9374	3.04541
562	2012-02-24	2.8375	91.2917	98.1854	0.775232	0.207895	0.0183848	0.0384811	0.00700681	0.0349552	0.00594293	1.6584	2.32258	1.32762	3.11688	3.17669
563	2012-02-27	3.75833	65.75	100.648	1.22896	0.406671	0.0394766	0.0476178	0.0167402	0.110122	0.00310657	2.30784	1.66118	1.33966	2.73048	2.84235
564	2012-03-01	2.75417	88.6667	99.2025	1.23828	0.0504633	0.0506956	0.034697	0.00603949	0.0238	0.0176548	0.974434	2.42585	1.08952	3.2785	3.33868
565	2012-03-04	-4.24583	69	99.3529	0.394888	0	0.109539	0.0487945	0.021702	0.0353928	0.0577995	1.0803	0.173449	0.411095	2.61662	2.84385
566	2012-03-07	10.5083	55.6667	100.611	1.87855	1.18747	0.0301784	0.0265802	0.00955338	0.0348787	0	1.34305	0.66399	0.685984	2.39677
567	2012-03-10	-2.88333	66.5417	101.759	0.591773	0.436316	0.0563972	0.0726113	0.0274193	0.160358	0	1.88709	0.516125	0.82883	2.69652	2.96697
568	2012-04-21	6.22917	82.25	99.8813	1.43651	0.122061	0.0292882	0.0267656	0.00758656	0.0605833	0.0393488	0.201732	0.114922	0.057971	2.86577	3.46918
569	2012-04-24	4.775	81.75	98.1796	0.886325	0.386863	0.0192757	0.0292929	0.00728859	0.0444684	0.00618439	0.556468	0.123124	0.236768	2.72728	2.85757
570	2012-04-27	4.46667	54.1667	100.577	0.986748	0.322781	0.0395391	0.0274321	0.0163598	0.0835525	0	0.914361	0.187738	0.381811	2.37157
571	2012-04-30	6.8625	64.4167	100.757	1.87923	0.86243	0.0175691	0.0435217	0.0176289	0.109475	0	1.33525	0.640495	0.627221	2.69578	2.81788
572	2012-05-03	14.75	91.125	100.213	2.37631	0.426394	0.0374876	0.0485041	0.0182448	0.135642	0.0251868	2.05766	4.32011	1.99898	2.9299	3.00475
573	2012-05-06	14.1542	43.375	100.67	2.72655	0.582533	0.0194963	0.0414699	0.0129012	0.0844408	0	0.806235	0.39382	0.424109	2.16239
574	2012-05-09	13.5125	85.1667	99.3088	3.16634	0.487422	0.00956639	0.0413739	0.013877	0.0768781	0	1.82812	3.6182	1.79499	2.96594	3.00775
575	2012-05-12	18.6917	56.2083	100.725	5.67456	1.19314	0.0148298	0.0699045	0.0323664	0.180224	0	2.52935	1.45552	1.41269	2.42396
576	2012-05-15	18.3625	57.5417	100.036	4.44113	1.20457	0.0266806	0.0705238	0.0293313	0.201885	0	2.49165	2.93587	1.70101	2.41106
577	2012-05-18	14.9708	49.3333	100.86	2.68425	0.950404	0.0211784	0.0394531	0.0352447	0.243402	0	0.891894	1.16916	0.600884	2.24358
578	2012-05-21	21.1	62.0417	100.284	3.84166	0.918645	0.0198315	0.383836	0.0536279	0.161666	0	1.7141	0.704162	0.525318	2.09057	2.44658
579	2012-05-24	21.95	75.1667	100.137	2.97672	0.622766	0.013232	0.0335171	0.0191196	0.126097	0	2.48143	0.760172	1.05186	2.14241	2.2191
580	2012-05-27	19.7958	60.4583	100.6	2.69347	0.383176	0.019738	0.0509777	0.0277402	0.186737	0	1.26548	0.419281	0.597459	2.00259	2.2629
581	2012-05-30	19.0958	54.5	99.52	2.8372	0.31832	0.0222963	0.0214555	0.0327931	0.182737	0.00907508	0.734483	0.178018	0.287344	1.97505
582	2012-06-02	14.0458	81.5417	99.0304	2.12858	0.1313	0.000452899	0.0234626	0.00714338	0.0349562	0	1.27976	0.761892	0.771201	2.60455	2.64561
583	2012-06-05	15.9417	69	100.172	2.3547	0.465161	0.0424423	0.0251818	0.0106838	0.0628787	0	0.582096	0.49155	0.368882	2.2925	2.53437
584	2012-06-08	22.5292	58.5417	99.9075	3.99517	0.759905	0.0128977	0.0351327	0.0221	0.104696	0	0.985668	0.193209	0.372848	1.99507
585	2012-06-11	23.05	77.5	100.258	3.59713	1.87148	0.0297153	0.101459	0.0249825	0.149789	0	6.78398	3.30944	3.37774	2.2769	2.32635
586	2012-06-14	18.3542	59.6667	101.118	1.93164	0.488696	0.000561447	0.0170224	0.0152688	0.126145	0	0.308063	0.175278	0.0793645	1.89505
587	2012-06-17	22.6292	75.1667	100.066	2.54934	0.803381	0.0493361	0.0449678	0.0108096	0.0461881	0	2.87081	0.626228	1.25187	2.04742	2.0948
588	2012-06-20	28.9583	64.25	100.245	5.96827	1.22196	0.133618	0.0727393	0.0432461	0.176242	0	4.73036	0.71183	1.88225	1.92763	2.01374
589	2012-06-23	21.8417	64.25	100.222	2.27843	0.634794	0	0.0180367	0.00937675	0.0433669	0	0.565337	0.191882	0.201853	1.84727	1.95405
590	2012-06-26	20.4667	55.5	99.8842	1.63382	0.533179	0.00725476	0.0283343	0.010899	0.0714985	0	0.652523	0.0572682	0.189923	1.65805
591	2012-06-29	27.3625	51.375	99.2633	3.61397	0.809341	0.0468563	0.0846587	0.0309444	0.183345	0.0264812	1.5078	0.180055	0.57331	1.63478
592	2012-07-02	24.6	56.7917	100.164	2.35733	0.808475	0.00151869	0.154456	0.0263245	0.0726349	0	0.88496	0.196998	0.308822	1.63416
593	2012-07-05	24.2292	69.625	99.9008	2.92459	0.743687	0.0108389	0.0477282	0.022129	0.179746	0	0.624297	0.207773	0.493008	1.94494	2.7215
594	2012-07-08	23.4208	65.5417	100.115	1.93229	0.999851	0	0.0191481	0.00733506	0.037044	0	0.897997	0.0621453	0.28632	1.70323	1.75842
595	2012-07-11	23.975	55.2917	100.752	1.93974	0.896913	0	0.0198075	0.0175281	0.120653	0	1.82084	0.135659	0.606317	1.55464
596	2012-07-14	26.6708	62.8333	100.635	1.81694	1.52278	0.0513067	0.0487492	0.0161871	0.0667517	0.00205186	3.89127	0.327794	1.50433	1.51246	1.56562
597	2012-07-17	30.225	62.375	99.3321	4.34711	1.28859	0.0138349	0.0483887	0.0290613	0.162674	0	3.23293	0.238865	1.13815	1.6891	1.76372
598	2012-07-20	21.4708	57.625	100.435	1.94641	0.654433	0	0.0184079	0.00968901	0.0845503	0	0.252244	0.049282	0.076669	1.71624
599	2012-07-23	27.3667	76.0417	99.7142	4.87262	1.52889	0.0106885	0.0549517	0.0180364	0.0949222	0	5.07098	1.96163	2.29521	2.12152	2.1547
600	2012-07-26	22.775	91.6667	98.9608	2.98742	0.376252	0.0197104	0.0377119	0.0104005	0.0545346	0	1.49627	0.747956	0.689239	2.53956	2.61104
601	2012-07-29	23.7708	65.3333	100.358	2.78422	0.351223	0.00566461	0.0234205	0.00873662	0.0431933	0	0.44512	0.215741	0.19016	1.85345	2.01276
602	2012-08-01	23.8333	74.6667	99.7813	2.65997	0.919612	0.0116596	0.0147651	0.0118983	0.0649636	0.00577958	0.925047	0.262427	0.416595	1.97849	2.07859
603	2012-08-04	27.3083	80.5417	100.244	2.68373	1.03777	0.0291985	0.0576928	0.0113193	0.0610012	0.0132548	5.53385	0.586901	1.8614	1.8713	1.9039
604	2012-08-07	23.3458	68.0833	100.052	3.1458	0.505708	0.0134013	0.0215473	0.0172509	0.0976272	0.00679266	1.66187	0.322812	0.734536	1.97873	2.0609
605	2012-08-10	20.8917	94.4583	99.325	2.15587	0.194977	0.0273916	0.0289525	0.00737262	0.0473477	0.019148	2.85865	0.657644	1.25333	3.07112	2.67576
606	2012-08-13	22.5417	74.4167	100.12	2.99332	0.432059	0.0184721	0.0186514	0.00944291	0.0375007	0.00505057	1.161	0.210316	0.429424	2.07594	2.13256
607	2012-08-16	22.475	78.9583	99.8571	3.2415	0.660524	0.0432043	0.0428493	0.0150423	0.0776968	0.00713033	3.69877	0.861262	1.43531	2.20814	2.25613
608	2012-08-19	19.9167	68.9167	100.009	3.15723	0.579534	0.0267991	0.041145	0.00802622	0.0317784	0	0.94023	0.364016	0.383972	2.16699	2.25106
609	2012-08-22	21.0667	71.875	100.578	3.37848	1.06272	0.0307996	0.0352923	0.0230555	0.131572	0.00184262	3.3353	0.805291	1.2573	2.18089	2.25094
610	2012-08-25	25.1708	70.3333	100.798	2.58452	1.03803	0.0145278	0.0446563	0.0120417	0.059139	0	7.43791	1.09865	2.78034	1.82158	1.84417
611	2012-08-28	21.0458	73.8333	100.175	2.28152	0.355264	0.00640019	0.01636	0.0108105	0.0564694	0.000985738	1.11159	0.202962	0.410763	2.02323	2.0938
612	2012-08-31	25.4708	63.7917	100.032	3.67869	0.669403	0.0189462	0.0341164	0.0234463	0.121993	0.00303666	3.25686	0.603868	1.25181	1.87559	1.93529
613	2012-09-03	23.1958	83.5	100.228	2.41312	0.643984	0.0227636	0.0520772	0.00884944	0.0333192	0.00495416	3.33599	0.381925	1.16815	2.61472	2.14379
614	2012-09-06	23.9333	69.125	99.7496	3.26144	0.947269	0.0401419	0.0490178	0.0187389	0.121073	0.0220886	1.82575	0.680122	0.725732	1.97639	2.09194
615	2012-09-09	15.9833	72.5417	99.9375	1.54883	0.555221	0.0250981	0.0109548	0.00513205	0.0159617	0.0113201	0.45666	0.11634	0.183118	2.11439	2.21789
616	2012-09-12	21.0083	75.375	100.981	2.43185	1.12662	0.0333889	0.0316628	0.0152637	0.0765521	0.00756695	3.63509	1.0025	1.40792	2.09671	2.14594
617	2012-09-15	15.0375	78.8333	100.912	2.27265	0.143496	0.0269389	0.030806	0.0102183	0.0486542	0.0226337	0.271055	0.244051	0.132108	2.45116	2.95935
618	2012-09-18	16.3792	88.5417	99.0117	1.3914	0.129996	0.0479392	0.0289247	0.00620409	0.0230669	0.0300972	1.67689	0.309698	0.644845	2.38194	2.44605
619	2012-09-21	16.5792	76.5417	99.8654	3.11392	0.215837	0.0204835	0.0374912	0.0226089	0.120364	0.00286309	1.6576	1.53735	0.97258	2.55039	2.65314
620	2012-09-24	10.9375	73.625	100.425	1.98322	0.0977319	0.0122589	0.0158392	0.0131413	0.0669164	0.00199505	0.546863	0.201477	0.243787	2.53051	2.73108
621	2012-09-27	12.8125	63.9167	100.993	1.83253	0.204945	0.0146885	0.0104531	0.0121537	0.101727	0.00452516	0.256137	0.115459	0.102478	2.23373	3.2792
622	2012-09-30	13.3083	79.7083	99.96	2.86272	0.042214	0.129593	0.201897	0.00826707	0.0654147	0.121571	0.558336	0.363095	0.290998	2.69039	3.54478
623	2012-10-03	17.1833	97.9167	100.335	2.96248	0.156294	0.026577	0.0579802	0.00960381	0.0684957	0.120475	2.72093	3.20755	1.91822	3.38015	3.42559
624	2012-10-06	9.73333	78.375	99.9533	1.68444	0.221465	0.0285512	0.0442429	0.00701695	0.0325743	0.0286047	0.879212	0.897335	0.598752	2.72999	2.80582
625	2012-10-09	11.1417	73	100.541	1.33912	0.479029	0.0495513	0.060867	0.0111501	0.0581736	0.0377913	2.92539	2.24326	1.67536	2.45075	2.51601
626	2012-10-12	6.74167	59.0417	101.29	1.48492	0.130575	0.0288829	0.0108252	0.00922923	0.0589957	0.0283213	0.248801	0.0908542	0.105809	2.44471
627	2012-10-18	12.7583	81.0833	99.3379	2.18497	0.706362	0.0276022	0.0495308	0.0130341	0.0939877	0.0240044	1.67983	1.0363	0.884499	2.67904	2.76185
628	2012-10-21	11.8167	77	100.164	2.17227	0.143863	0.0287971	0.0631464	0.0071629	0.0393121	0.0278696	2.35472	0.881977	1.13486	2.62402	2.67243
629	2012-10-24	11.1208	87.4583	100.618	1.69377	0.222843	0.0249445	0.0395312	0.0084692	0.0469518	0.0274862	0.834369	1.23048	0.691475	2.86829	2.9455
630	2012-10-27	8.17083	90.5	100.646	0.878118	0.124973	0.0276711	0.0335571	0.00318404	0.0181243	0.0360797	0.238849	0.0856175	0.133966	2.76616	3.02304
631	2012-11-02	3.90833	82.2083	99.4925	1.31567	0.0403784	0.005096	0.0165046	0.00570384	0.02882	0	0.177305	0.0586521	0.0741829	2.92872	3.2073
632	2012-11-05	1.35	65.6667	100.878	1.13537	0.00449178	0.0168001	0.0276771	0.0115285	0.0697074	0.00352537	0.426015	0.257538	0.202579	2.78972	3.04574
633	2012-11-08	2.79583	62.625	100.713	2.26994	0.133823	0.0501805	0.0490706	0.0177472	0.11491	0.032573	0.665858	1.65941	0.630893	3.1218	3.29872
634	2012-11-11	12.95	74.2917	100.835	2.58552	0.381543	0.0552791	0.0861976	0.00961175	0.0562193	0.0356574	2.91868	2.74155	1.91087	2.67854	2.73111
635	2012-11-14	4.24167	63.9583	102.141	1.7717	0.148953	0.0698738	0.14391	0.022695	0.0842185	0.0273343	1.2632	1.72804	0.813079	2.87061	3.03948
636	2012-11-17	6.24583	84.5	102.264	2.54227	0.102167	0.030453	0.0886213	0.0103659	0.0698988	0.0262063	2.63757	7.74897	3.14412	3.27084	3.31357
637	2012-11-20	7.3125	90.7083	100.875	1.14729	0.353103	0.0323346	0.115596	0.0092348	0.0661548	0.0677752	2.38543	10.5989	3.99735	3.04254	3.11064
638	2012-11-23	8.55833	73.75	99.2713	1.78535	0.220757	0.0509257	0.0739347	0.0144869	0.0753847	0.0194576	2.14891	1.19321	1.08552	2.69189	2.78005
639	2012-11-26	2.025	72.6667	100.502	2.18946	0.136109	0.0246073	0.0348633	0.0127154	0.0635113	0	1.11421	1.37786	0.766261	3.22241	3.29709
640	2012-11-29	3.4	71.2083	100.991	2.56647	0.424421	0.0235651	0.0699746	0.0186776	0.131256	0.000315405	1.85003	5.74242	2.2242	3.23438	3.30568
641	2012-12-02	9.05	95.5	100.207	1.78763	0.739928	0.0365224	0.0940696	0.0090293	0.044484	0.0724792	3.11387	3.78932	2.30218	3.30487	3.35723
642	2012-12-05	1.50417	70.375	101.028	1.11682	0.0609925	0.123266	0.02313	0.0231965	0.0724369	0.122226	0.415059	0.271367	0.184416	2.85297	3.59728
643	2012-12-08	4.69583	93.1667	99.9712	0.654795	0.0661727	0.0153069	0.0614719	0.00369757	0.0186921	0.0584502	2.02936	5.22092	2.27648	3.04657	3.0948
644	2012-12-11	-1.62917	78.7083	100.245	1.48664	0.150688	0.0184357	0.0366132	0.0131997	0.0690939	0	1.3269	1.07583	0.739383	3.32105	3.39786
645	2012-12-14	4.075	73.5417	100.915	1.72568	0.377801	0.0237806	0.0688783	0.0138367	0.089886	0.0348409	1.85921	5.7166	2.3032	3.05823	3.12307
646	2012-12-17	7.86667	91	99.1471	2.78278	0	0	0.0310425	0.00992098	0.0547831	0	1.53355	3.10908	1.51117	3.39204	3.42633
647	2012-12-20	3.32778	75.1111	99.6356	1.98298	0.247802	0	0.0149739	0.0166288	0.116494	0	0.789528	0.681573	0.421234	3.10574	3.23161
648	2012-12-23	0.35	68.6667	99.8175	0.933572	0.181717	0.0146746	0.0191028	0.00651072	0.0185336	0	0.989218	2.25221	1.03442	2.96471	3.0084
649	2012-12-26	-3.49583	73.0417	100.752	0.332724	0.25442	0.00486646	0.00963745	0.00483556	0.0171985	0	0.909818	0.291053	0.434248	2.63224	2.69378
650	2013-01-10	4.04167	61.375	101.919	1.68323	0.439357	0.0419827	0.0216882	0.0133819	0.0689404	0.00580825	0.936564	0.528657	0.547281	2.81273	2.9485
651	2013-01-13	10.5917	89.5	99.6225	1.9484	0.427737	0.0254292	0.058423	0.00666524	0.0424941	0.0429054	1.81348	2.59115	1.50866	3.01491	3.05983
652	2013-01-16	0.833333	60.4583	99.9604	1.46985	0.529456	0.103707	0.0484755	0.0183372	0.102861	0	1.82655	5.44927	2.1964	3.0159	3.14103
653	2013-01-19	4.87917	62.9583	99.6467	1.53552	0.377747	0.0558181	0.0467098	0.00857279	0.0451073	0.0356722	1.13035	2.10563	1.02482	2.82042	2.91073
654	2013-01-22	-12.8125	72.625	100.442	0.758365	0.22361	0.0516541	0.0239829	0.0123908	0.0462941	0.0207653	0.528666	0.416478	0.244158	3.64027
655	2013-01-25	-9.75417	79.2083	101.156	1.37364	0.595239	0.0785124	0.0552429	0.0111827	0.0448299	0.112726	0.943316	2.65619	1.08118	3.87984	3.98162
656	2013-01-28	1.3625	92.1667	100.311	0.5235	0.611108	0.0253686	0.0647343	0.00559547	0.0365727	0.118041	2.92107	2.70836	1.9379	2.97538	3.06907
657	2013-01-31	-1.3	72.9167	98.2013	0.893435	0.277711	0.0609243	0.0363655	0.00599084	0.0339686	0.0991844	0.371043	0.252694	0.187095	3.00875	3.21572
658	2013-02-03	-6.575	63.1667	99.8596	1.76615	0.471362	0.118126	0.0413284	0.0107718	0.033036	0.0535506	1.33261	2.42184	1.11555	3.54908	3.68132
659	2013-02-06	-4.35417	59.2917	100.799	0.794645	0.507041	0.458119	0.0350795	0.012457	0.0604968	0.657287	1.29449	1.84898	0.970837	2.94025
660	2013-02-09	-7.17917	73.5833	101.43	0.793272	0.481686	0.0727327	0.041221	0.00532198	0.0170043	0.0544772	0.974561	1.35678	0.718902	3.31826	3.43134
661	2013-02-12	1.26667	70.1667	99.7829	0.888524	0.562187	0.0283217	0.0446007	0.00434233	0.0205178	0.0508176	2.01253	1.0066	1.03761	2.74157	2.79994
662	2013-02-15	-0.55	68.4583	99.9442	1.59512	0.273118	0.0828625	0.0244914	0.0119297	0.02563	0.0229975	0.980399	0.903488	0.54939	3.15171	3.25714
663	2013-02-18	-5.95833	68.0833	100.716	0.835879	0.982072	0.15629	0.0584098	0.00825419	0.0323802	0.182982	0.858227	1.9639	0.835914	3.14204	3.36147
664	2013-02-21	-7.5375	67.9167	101.139	0.647911	0.395385	0.22542	0.018784	0.0254946	0.0398352	0.189551	0.691734	0.451485	0.264018	3.05797	3.48217
665	2013-02-24	0.470833	76.9583	100.024	0.67244	0.619619	0.0121156	0.0450127	0.00857352	0.0224138	0.0524576	2.58848	5.87659	2.65895	2.82899	2.88219
666	2013-02-27	1.28333	96.875	99.065	1.13738	0.903563	0.00324424	0.0197531	0.00490052	0.0102708	0.000939597	0.486906	0.449016	0.301947	3.64179	3.67729
667	2013-03-02	-4.9375	70	100.142	0.714248	0.581773	0.0411733	0.0178204	0.0109467	0.0314861	0.0125518	0.799572	0.355162	0.351482	2.99668	3.12347
668	2013-03-05	-2.4875	70.75	100.479	1.14353	0.659246	0.163462	0.0298039	0.0263414	0.047345	0.00949904	0.892083	0.868514	0.385433	3.0683	3.29814
669	2013-03-08	3.425	71.375	101.523	1.42188	0.33066	0.0448108	0.0223589	0.0113458	0.0475072	0.0125486	0.560225	0.738289	0.355974	2.92993	3.05579
670	2013-03-11	9.07083	64.25	99.5325	2.9957	1.09212	0.0392484	0.0132563	0.0697672	0.154206	0.048628	0.0751059	0.0554508	0.00681476	2.94929	3.87307
671	2013-03-14	-3.21667	50.9167	100.473	1.73327	0.599434	0.0859583	0.01436	0.0152086	0.0509942	0.0782756	0.46931	0.258696	0.208054	3.082
672	2013-03-17	-3.5625	51.75	100.932	0.677479	0.732174	0.0599536	0.0146267	0.0104653	0.0225839	0.0325192	1.22168	0.453733	0.523451	2.54968
673	2013-03-20	-2.02917	64.625	99.6225	1.29365	0.623327	0.123057	0.0279205	0.0129934	0.0364685	0.0331081	1.34177	1.21091	0.716142	3.04865	3.19345
674	2013-03-23	1.55	63.375	100.19	1.13663	0.28625	0.0651329	0.0168648	0.00830712	0.0252583	0.0740426	0.531806	0.28453	0.270225	2.79798	2.96445
675	2013-03-26	5.75417	52	99.7854	1.37316	0.427186	0.0981544	0.0157052	0.0194776	0.0906391	0.0733694	0.336508	0.290761	0.186534	2.51487
676	2013-03-29	6.87917	50.0833	100.859	1.48913	0.556526	0.0407477	0.0245066	0.0104952	0.0381831	0.0192768	0.317772	0.568183	0.251947	2.52274
677	2013-04-01	1.38333	58.6667	99.56	1.93114	0.246172	0.0159662	0.0141594	0.00999178	0.0408659	0.0120441	0.963696	0.76146	0.548237	2.99998
678	2013-04-04	3.64167	45.1667	100.724	1.82244	0.87279	0.0407901	0.0287774	0.0194693	0.080645	0	1.17347	1.01185	0.67686	2.62641
679	2013-04-07	9.00833	57.0417	99.6517	2.36248	0.468715	0.0240221	0.0325688	0.0106218	0.0580269	0.000242492	1.63343	1.0805	0.893635	2.60582
680	2013-04-10	6.57083	86.5417	100.275	1.57245	0.361886	0.0382163	0.0280142	0.00507712	0.017372	0.0339761	1.98652	1.03281	1.02092	2.98996	3.0291
681	2013-04-13	4.97083	79.5833	99.5812	1.17132	0.479319	0.00115694	0.0169916	0.00415967	0	0	1.31527	2.30697	1.15551	2.88802	2.90111
682	2013-04-16	12.0708	66.2917	100.367	1.59755	0.450479	0.0142239	0.0152557	0.0100418	0.0379614	0	1.19307	0.64598	0.599359	2.3197	2.38611
683	2013-04-19	12.6625	71.4167	98.6787	1.82799	1.17545	0.0312011	0.0222837	0.0109834	0.0202615	0	1.59876	0.678442	0.74169	2.42633	2.4747
684	2013-04-22	7.23333	52.625	101.782	1.39945	0.419645	0.0200283	0.0241584	0.0185934	0.0698965	0	1.60815	1.08511	0.833788	2.41314
685	2013-04-25	5.62917	73.1667	100.831	1.62786	0.712882	0.0331017	0.0452713	0.0105526	0.0420247	0.0221967	1.7602	2.3223	1.25876	2.85969	2.91512
686	2013-04-28	13.15	57.625	100.55	2.39868	0.560558	0.0329779	0.0451746	0.0101878	0.0396477	0.0207976	1.77018	2.14815	1.21128	2.43572
687	2013-05-01	17.6375	54.4583	101.228	2.78425	0.711782	0.0227448	0.0639122	0.0111439	0.0414312	0	2.48082	1.05519	1.16672	2.09815
688	2013-05-04	16.7208	40.875	100.985	2.91939	0.617507	0.0405775	0.0377849	0.0149912	0.0487274	0	0.853037	1.0215	0.52794	2.04822
689	2013-05-07	18.3958	30.9167	100.49	4.72214	1.74428	0.156376	0.0360766	0.0484034	0.251496	0	1.35114	1.8299	0.752236	2.12425
690	2013-05-10	13.525	83.4583	99.6838	4.37938	1.17264	0	0.0282477	0.0074464	0.0307948	0.0168991	1.51419	2.97522	1.6096	3.07148	3.09065
691	2013-05-13	6.625	53	100.395	1.89813	0.776342	0	0.00620344	0.0108807	0.0320597	0	0.549694	0.301469	0.276104	2.62964
692	2013-05-16	16.9583	43.8333	99.695	3.74773	0.432346	0	0.00920683	0.0168809	0.106206	0	0.489798	0.265794	0.245098	2.12259
693	2013-05-19	16.9875	65.4167	100.464	3.19177	0.607138	0	0.148742	0.0166189	0.0239284	0	1.5906	1.27423	0.850764	2.35216	2.43192
694	2013-05-22	18.275	82.0833	99.3392	5.34654	0.232834	0	0.036055	0.0201159	0.135284	0	2.28448	3.71398	1.92134	2.85709	2.90802
695	2013-05-25	10.3833	52.9583	101.09	1.38586	0.226086	0	0.0094647	0.00449792	0	0	0.273298	0.154168	0.130103	2.13272
696	2013-05-28	12.625	78.5	100.326	2.53513	0.8343	0.0013116	0.0385026	0.00756347	0.0311791	0.00340668	1.4782	1.11198	0.933484	2.73915	2.77225
697	2013-05-31	23.5458	70.9167	100.201	4.77821	0.99665	0.0808231	0.0621686	0.0229378	0.0652842	0	3.26725	1.32334	1.47126	2.21801	2.27952
698	2013-06-03	13.2667	56.9167	100.178	1.43828	0.301625	0	0.0108374	0.00687351	0.0294335	0	0.240641	0.069174	0.163038	2.03534
699	2013-06-06	13.3625	73	100.147	1.64118	0.594539	0	0.0118794	0.00364951	0.0138867	0	0.569371	0.369684	0.344557	2.35945	2.39995
700	2013-06-09	18.375	58.125	100.724	2.19247	0.494112	0.0148306	0.033116	0.00486288	0.00727874	0	1.73251	0.495842	0.755987	1.96347
701	2013-06-12	18.7875	64	99.8096	3.45266	0.511331	0.00145741	0.0199482	0.0096038	0.0521402	0	0.368639	0.365145	0.244997	2.21314	2.44295
702	2013-06-15	19.0125	48.4583	100.244	2.8328	0.841721	0.057131	0.155798	0.0150588	0.062209	0.015648	1.44786	0.561111	0.6124	1.93934
703	2013-06-18	17.2625	61.125	100.239	1.52563	0.488901	0.0152823	0.0266613	0.00847486	0.0537741	0	0.313646	0.12347	0.173094	1.88888	2.31694
704	2013-06-21	20.6958	50.875	100.983	5.15961	1.65491	0.0215012	0.0512834	0.0297425	0.181398	0	1.69264	0.957961	0.888508	2.18096
705	2013-06-24	26.4042	66.2083	100.14	5.72218	1.44417	0.0647844	0.126555	0.01867	0.0851811	0.0508211	6.62899	2.11869	2.80266	2.08354	2.12316
706	2013-06-27	22.2833	78.375	99.3375	4.32782	1.16823	0.192767	0.0690256	0.0213126	0.102938	0.0445483	3.95737	3.71202	2.42547	2.44858	2.5276
707	2013-06-30	20.6958	67.375	99.6967	2.83427	0.592485	0.0165163	0.100743	0.00863867	0	0	0.327585	0.172403	0.143075	2.05029	2.33379
708	2013-07-03	21.5273	79.6818	100.668	2.58315	1.2469	0.00768067	0.199801	0.0153467	0.0825547	0	3.81812	2.87328	2.26112	2.29622	2.35778
709	2013-07-06	24.1583	75.75	100.535	3.61736	1.06914	0	0.125067	0.0194025	0.0332828	0	4.10546	1.6067	1.67855	2.12855	2.16264
710	2013-07-09	22.475	87.8333	100.157	2.55717	0.844186	0	0.0385756	0.00910106	0.047429	0	3.51993	3.60302	2.3474	2.44549	2.46863
711	2013-07-12	20.8875	65.125	100.721	2.61453	1.50448	0	0.00536341	0.0105536	0.0592179	0	0.17561	0.0973661	0.0802515	1.98605	2.66781
712	2013-07-15	27.1083	61.2917	101.139	4.38265	1.31502	0	0.030981	0.0179865	0.0943689	0	2.21444	0.405231	0.768796	1.83321	1.88935
713	2013-07-18	29.5625	61.9167	100.295	7.37363	1.41496	0.0230198	0.0321866	0.025356	0.109819	0	3.3895	0.457059	1.15913	1.94881	1.99715
714	2013-07-21	20.0083	62	100.215	1.96554	0.407593	0.0223315	0.0231832	0.007113	0.0170719	0.0154975	0.258277	0.0869064	0.107473	1.85082	2.11425
715	2013-07-24	17.475	57.4583	100.01	1.39482	0.484458	0.0120396	0.00605278	0.00675149	0.0201156	0.0116455	0.280531	0.0705375	0.128185	1.78652
716	2013-07-27	20.375	80.9167	99.8483	2.35359	0.895459	0.00843175	0.0255358	0.0080164	0.0213714	0	2.81302	0.439671	1.12019	2.22101	2.24249
717	2013-07-30	19.5542	69.0833	100.795	3.39697	0.305425	0.00142456	0.00974552	0.0135361	0.0529026	0	0.71756	0.335495	0.328963	2.21888	2.31871
718	2013-08-02	20.1333	70.1667	99.7121	3.59437	0.628677	0	0.0224082	0.0127862	0.0733991	0	1.27655	0.534572	0.54376	2.24033	2.31472
719	2013-08-05	18.6625	59.5417	100.464	1.85461	0.499511	0.0108873	0.0305758	0.0126184	0.0295974	0	0.803635	0.157673	0.281882	1.86257
720	2013-08-08	23.7375	67	100.022	2.41227	0.876754	0.0201881	0.0295984	0.0119972	0.084277	0.0152707	2.03983	0.673651	0.784279	1.8208	1.88706
721	2013-08-11	19.075	61.5417	100.544	2.32487	0.528414	0.00764127	0.023296	0.0082312	0.0418081	0	0.733405	0.218835	0.292043	1.97293	2.06412
722	2013-08-20	23.8583	62	100.527	4.54298	1.60952	0.0088609	0.0709897	0.024358	0.130974	0	6.7659	2.02876	2.89487	2.06698	2.1072
723	2013-08-23	20.3458	56.7917	100.668	2.34	1.16517	0.00948889	0.0090383	0.016386	0.108805	0.0045792	0.474266	0.174686	0.200506	1.86132
724	2013-08-26	21.9708	85.5417	100.252	5.16618	0.942935	0.0116631	0.0681599	0.0125218	0.0564825	0.0140307	5.73762	1.84691	2.58721	2.61943	2.64266
725	2013-08-29	25.0095	72.6667	100.313	4.944	0.511269	0.0111134	0.0412462	0.0177094	0.116458	0	1.97602	0.441446	0.712123	2.14441	2.22347
726	2013-09-01	22.0667	80.125	99.6237	2.78287	0.65165	0	0.0090864	0.00419513	0.0238746	0.00197412	0.877646	0.265997	0.370647	2.18607	2.2185
727	2013-09-04	19.4417	66.7083	100.122	3.64971	0.568224	0.0129953	0.0167728	0.0153991	0.0620724	0	0.783742	0.194639	0.290724	2.2192	2.34704
728	2013-09-07	17.825	82.8333	100.109	3.31471	1.04013	0.0289102	0.0439526	0.00995917	0.0323448	0.0394778	1.58049	1.33965	0.888142	2.63468	2.68002
729	2013-09-10	24.7875	74.75	99.9371	4.92813	1.37722	0.0881947	0.0910974	0.0217529	0.110331	0.0361416	5.67635	1.37445	2.25475	2.2103	2.26303
730	2013-09-13	12.3708	67.7917	100.089	1.96377	0.478812	0.297398	0.00805474	0.00414495	0	0.00692777	0.0250984	0.0781597	0.0310754	2.37834
731	2013-09-16	12.2917	70	101.054	2.82284	0.498859	0.0234655	0.0133211	0.00741746	0.0287948	0.00932094	0.249801	0.223642	0.149496	2.63662	2.86691
732	2013-09-19	16.6417	85.0417	100.463	2.69386	1.08266	0.0022189	0.0400012	0.0146739	0.0578277	0	5.42489	4.43198	3.22944	2.6457	2.67044
733	2013-09-22	10.9167	68.9583	100.002	1.16917	0.568315	0.00463842	0.0145753	0.0049276	0.00196735	0.0117103	0.401073	0.0409417	0.177031	2.24025	2.28793
734	2013-09-25	14.6542	64.9167	100.259	3.77882	0.434975	0.0955659	0.0349408	0.0267656	0.132786	0.0155886	0.637225	0.789891	0.31523	2.56202	2.97603
735	2013-09-28	15.9167	83.5417	101.034	2.11345	0.732274	0.00492781	0.0269948	0.00702023	0.0226709	0	1.24321	1.0893	0.762571	2.56534	2.59916
736	2013-10-01	17.2875	82.125	100.106	2.81519	0.609745	0.075257	0.0529976	0.0160279	0.0676568	0.0729893	4.22891	2.81586	2.28392	2.56595	2.61477
737	2013-10-04	16.3917	85.7917	100.349	2.25453	0.501912	0.0457356	0.0230951	0.00765967	0.0243034	0.0590913	0.943734	1.1688	0.656109	2.6345	2.7007
738	2013-10-07	14.5792	76.5417	99.4183	1.85625	0.275256	0.0109927	0.0176361	0.00741317	0.014359	0.0125239	1.09674	0.444399	0.481867	2.35957	2.39769
739	2013-10-10	14.1542	76.875	101.019	2.61456	0.60962	0.0146662	0.0205622	0.0110302	0.0543375	0	0.62255	1.06672	0.498448	2.6711	2.76258
740	2013-10-13	15.8667	84.7917	101	2.26612	0.463203	0.027225	0.0277468	0.0087992	0.0136124	0	0.890275	0.761953	0.520748	3.12485	2.66971
741	2013-10-16	17.0083	81.4583	99.5746	2.58745	0.137599	0.0167247	0.0370956	0.00973313	0.0612832	0	1.60676	1.94216	1.09034	2.56714	2.62335
742	2013-10-19	9.08333	82.5833	99.4425	3.18818	0.621497	0.00636392	0.00803351	0.00932568	0.0418715	0	0.911464	0.975704	0.633582	3.13224	3.17181
743	2013-10-22	7.12083	63.375	99.5779	1.77473	0.532618	0.0155174	0.0123663	0.0156459	0.097836	0	0.259522	0.547486	0.213722	2.76437	3.03306
744	2013-10-25	6.0375	72.2083	100.697	2.27338	0.763802	0.0322093	0.0148047	0.00990688	0.0738467	0	0.392175	0.416803	0.256982	3.02227	3.16472
745	2013-10-28	6.37895	56.2632	100.956	1.65377	0.429624	0.0274744	0.0159338	0.00990345	0.0368862	0	1.95614	0.585376	0.848325	2.52375
746	2013-10-31	11.7375	89.8333	99.2429	1.97933	0.354933	0.0390964	0.0558784	0.00654074	0.0415479	0.0291757	2.2766	2.49845	1.59712	2.94675	2.99285
747	2013-11-03	1	61.0417	101.43	1.35983	0.628973	0.121042	0.0513554	0.0197736	0.0442851	0.0296091	0.140455	0.502421	0.0965933	3.01117	3.43009
748	2013-11-06	11.6792	70	100.259	1.91726	0.533218	0.044273	0.0283369	0.0149698	0.0552172	0	0.831106	0.360368	0.35011	2.45854	2.61364
749	2013-11-09	6.825	68.125	100.201	1.84484	0.395826	0.0008524	0.0303769	0.00870919	0.0392909	0	1.20768	1.48157	0.851511	2.80638	2.85252
750	2013-11-12	-1.5875	59.8333	101.331	1.11234	0.257683	0.0108518	0.00348087	0.0121065	0.0486757	0	0.361056	0.131729	0.168541	2.94007
751	2013-11-15	7.97083	53.75	100.375	2.26454	0.589711	0.0241778	0.061058	0.0161242	0.10067	0.00344822	1.12357	1.71242	0.824281	2.67747
752	2013-11-18	7.15417	63.4583	98.8863	1.19285	0.204293	0.042148	0.029232	0.00885351	0.0424354	0.0247884	0.595362	0.159405	0.281679	2.39945	2.59503
753	2013-11-21	5.39583	67.5833	101.423	1.47347	0.641088	0.0294266	0.0506856	0.0101614	0.0507602	0.0137691	0.769093	1.77841	0.751265	2.81832	2.906
754	2013-11-24	-7.72083	68.4167	101.524	0.971193	0.323371	0.166006	0.014905	0.00937202	0.0224929	0.174151	0.36131	0.268623	0.175952	3.40147	3.76096
755	2013-11-27	-1.07391	77.087	99.5274	0.881898	0.140595	0.0521371	0.0291204	0.018621	0.0322266	0	1.23502	1.51201	0.794171	3.0298	3.12927
756	2013-11-30	0.2625	64.3333	101.66	0.782461	0.60243	0.0490056	0.0427284	0.0101042	0.0488704	0.0118487	1.53649	1.82268	1.06837	2.71521	2.83344
757	2013-12-03	1.50833	66.7917	100.147	1.86782	0.569614	0.176392	0.0377192	0.0205094	0.136427	0.203929	1.3736	1.53706	0.848069	3.07623	3.27673
758	2013-12-06	0.933333	59.4167	100.769	1.39357	0.26357	0.0235401	0.0260605	0.0209237	0.0909559	0	1.28059	0.904891	0.676272	2.86465
759	2013-12-09	0.0583333	78.5	99.9975	0.555473	0.30598	0.0362745	0.037315	0.00807492	0.0409451	0	2.6013	2.6322	1.70905	2.77094	2.86014
760	2013-12-12	-8.6125	65.9167	100.973	1.34499	1.49588	0.114284	0.0404919	0.0180127	0.0846432	0	1.31112	1.94251	0.914369	3.45092	3.64604
761	2013-12-15	-7.93043	81.9565	99.3926	0.779489	0.822885	0.0577351	0.0435527	0.0093003	0.0237083	0	1.22731	1.28384	0.794469	3.40736	3.51605
762	2013-12-18	-1.70833	75.7917	100.198	1.37632	0.484683	0.0369073	0.056048	0.00914361	0.0381667	0.00983956	2.58078	7.1335	2.94265	3.29646	3.34799
763	2013-12-21	0.508333	93.8333	99.6713	0.981712	0.147324	0.0128714	0.0187484	0	0	0.00348073	0.841488	1.4858	0.768862	3.48276	3.5024
764	2013-12-24	-9.8125	75.625	101.411	1.1438	0.382861	0.104633	0.0306219	0	0.00221418	0	0.85429	0.567804	0.40824	3.66208	3.75868
765	2013-12-27	-1.98333	77.3333	100.971	0.65689	0.354617	0.00175792	0.0319976	0	0	0.0191149	2.05413	5.68967	2.51011	3.08962	3.10571
766	2013-12-30	-8.64583	56.3333	100.673	0.862161	0.373253	0.219579	0.00991203	0.00034829	0.0401506	0.191682	0.458051	0.457656	0.215091	3.13687
767	2014-01-08	-11.1375	67.7917	101.472	0.815289	0.726872	0.0854789	0.06459	0.0150069	0.0350137	0	1.49698	5.13976	1.99693	3.52419
768	2014-01-20	-7.87083	70.375	99.4267	0.321859	0.481754	0.120254	0.0125365	0.00697051	0.0140482	0	0.929166	1.63136	0.729041	2.65372	2.97754
769	2014-01-23	-14.4333	65.8333	100.949	0.517794	0.374949	0.360854	0.0313426	0.019203	0.0461058	0.230775	0.548221	1.55729	0.451083	3.3093
770	2014-01-26	-10.5125	73	98.9337	1.25359	4.18305	0.215032	0.0287765	0.0257517	0.009346	0	0.881662	1.20412	0.480294	2.13033
771	2014-02-01	0.1375	90.0417	100.33	1.38736	0.593355	0.0387114	0.0785131	0.00612517	0.0284491	0.0650168	2.7396	8.19491	3.34588	3.45931	3.50726
772	2014-02-04	-6.72083	71.3333	101.625	1.15944	0.9391	0.0666689	0.0636488	0.00733648	0.0446922	0.147949	2.33447	7.87921	3.12138	3.4538	3.53729
773	2014-02-07	-10.7167	65.7917	101.035	0.635573	0.949909	0.0699061	0.0554603	0.0107846	0.0221475	0.0227909	1.46852	5.40417	2.10321	3.29314
774	2014-02-10	-9.15417	65.6667	100.939	1.12589	1.27753	0.118327	0.0675578	0.0166883	0.0212213	0.0494769	1.98251	3.09845	1.62291	3.44185	3.5954
775	2014-02-13	-5.03043	66.3043	99.9717	0.782412	1.40617	0.211263	0.119343	0.0160189	0.0448955	0.226966	2.65053	7.85994	3.14582	2.8344	3.1428
776	2014-02-16	-10.5833	66.625	100.583	0.629627	0.927878	0.262432	0.0240568	0.0133509	0.0267993	0.182359	0.778998	0.610754	0.347445	3.08488
777	2014-02-22	2.21667	48.5	99.5233	2.29278	0.768241	0.0635535	0.0306776	0.0093467	0.0412133	0	0.530937	1.12807	0.466215	3.00609
778	2014-02-25	-7.80417	65.1667	100.321	1.42567	0.479051	0.131489	0.0293376	0.0196825	0.0682532	0	1.3943	0.867768	0.631158	3.45017	3.61835
779	2014-02-28	-13.2292	55.0833	101.286	1.14499	1.65119	0.150603	0.0307695	0.0191465	0.0382343	0.0929358	1.45732	0.860613	0.653275	3.1744
780	2014-03-03	-14.4042	51.875	101.515	1.12582	0.769644	0.512535	0.040705	0.035017	0.0586818	0.577203	1.05695	0.818204	0.491188	3.31488
781	2014-03-06	-6.27917	67.2917	101.947	1.37392	1.67244	0.217318	0.0277697	0.012994	0.0355729	0.0287703	1.27265	1.17996	0.632795	3.27025	3.48353
782	2014-03-09	-3.60417	59.7917	100.356	1.58124	1.67242	0.182618	0.0295701	0.00977922	0.0409927	0	1.73403	1.30906	0.852599	3.08873
783	2014-03-15	1.14583	63.625	99.7687	1.92997	1.72874	0.0761776	0.0182627	0.00963483	0.0318762	0.0402291	1.16184	1.68503	0.862653	3.06379	3.14146
784	2014-03-18	-0.875	65.4583	100.667	1.23972	1.36631	0.10621	0.031356	0.0149363	0.0708098	0.0541576	0.518051	1.59598	0.526607	2.99308	3.17832
785	2014-03-21	0.358333	62.2083	100.307	2.26862	1.15502	0.0851213	0.0316815	0.0205437	0.0994543	0	1.93756	1.06037	0.903528	3.11792	3.24238
786	2014-03-24	-6.025	54.125	101.009	1.73673	0.682547	0.0987167	0.0270279	0.0248985	0.10824	0	1.5682	0.756787	0.680712	3.24796
787	2014-04-02	4.26667	57.1667	100.623	2.94536	1.17368	0.0421565	0.0166288	0.0245823	0.11433	0	1.55742	1.63497	0.930282	3.00637
788	2014-04-05	2.58333	62.4167	99.9375	1.92528	0.938534	0.0392607	0.0110782	0.0138568	0.0645091	0	0.803372	0.389835	0.355565	2.96488	3.08782
789	2014-04-08	6.87917	71	98.5804	1.89325	1.39651	0.0156939	0.0204574	0.0116644	0.0646504	0	1.22057	0.949298	0.674474	2.79596	2.86005
790	2014-04-11	10.2167	47.25	100.245	3.65296	0.884355	0.0601381	0.0265935	0.0317058	0.18015	0.0145578	0.625445	1.67918	0.626149	2.76229
791	2014-04-17	3.87917	58.2083	101.878	1.63969	1.27114	0.0665255	0.0549144	0.0131399	0.082734	0.0325182	1.33875	1.27792	0.785364	2.74609
792	2014-04-20	7.87917	51.5833	101.342	2.12633	1.28013	0.0310814	0.0449849	0.00993104	0.0613709	0	2.59185	1.34617	1.30276	2.53177
793	2014-04-23	5.74583	56.3333	99.9696	0.866722	0.86676	0.00231621	0.00741029	0.00747449	0.0524013	0	0.953669	0.173568	0.359165	2.25878
794	2014-04-26	6.51667	73.9167	99.7592	2.11284	1.71866	0.0067694	0.0175993	0.00666441	0.034459	0	1.29575	1.96927	1.01072	2.9213	2.95128
795	2014-04-29	6.78333	83.375	100.155	1.93464	1.21316	0.00702347	0.00703367	0.00539286	0.0186262	0	0.63747	0.521238	0.332069	3.02316	3.05251
796	2014-05-05	9.74583	53.9583	100.312	1.87199	0.818598	0.0107531	0.0125938	0.0126103	0.0752285	0	0.482224	0.672202	0.340704	2.48519
797	2014-05-08	13.5	40.1667	100.49	2.55164	1.12787	0.0139184	0.0231968	0.0153133	0.112656	0	0.856587	0.792247	0.521943	2.21041
798	2014-05-11	15.6833	46.0417	100.401	6.4674	1.2614	0.0336745	0.03329	0.0130738	0.0728708	0	1.01033	0.869532	0.592929	2.59471
799	2014-05-14	16.6625	81.9583	100.467	4.53634	0.609489	0.0266225	0.0295764	0.0116016	0.0839533	0	1.53562	3.31331	1.41458	2.87454	2.92167
800	2014-05-17	8.09583	66.2917	100.485	2.52458	0.344984	0.0348819	0.119106	0.0145502	0.0489865	0	0.912016	1.04435	0.553876	2.83289	2.96007
801	2014-05-23	13.975	74.0833	100.204	2.86585	0.442409	0.0116895	0.0120368	0.0162318	0.0694292	0	0.752582	0.39235	0.345682	2.574	2.70754
802	2014-05-26	23.8375	42.7917	100.124	7.48213	1.17186	0.0308716	0.0563387	0.0296762	0.153524	0	2.24115	0.671961	0.972505	2.06739
803	2014-06-04	18.2875	51.3333	99.7037	3.67222	0.768768	0.0193435	0.0143889	0.00805335	0.0441554	0	0.212903	0.173089	0.110736	2.11515
804	2014-06-07	20.1083	38.125	100.296	4.31445	1.55082	0.0603301	0.0485815	0.0170369	0.0945626	0.0378799	0.753477	0.347276	0.338467	1.98552
805	2014-06-13	19.4667	68.5833	99.4913	4.14138	0.50449	0.0101049	0.0191203	0.012106	0.0665422	0	1.50646	1.43951	0.918859	2.37603	2.44044
806	2014-06-16	17.8792	69.7083	100.375	4.23452	0.420625	0.0180522	0.0501491	0.00112518	0.127561	0	1.32905	1.61512	0.832808	2.51565	2.62735
807	2014-06-19	20.5042	51.5417	100.64	2.99843	0.490837	0.0428064	0.0382829	0.0136655	0.0781189	0	0.467191	0.209459	0.187165	1.89784
808	2014-06-22	20.5958	46.8333	100.201	3.58371	0.9541	0.0329982	0.0379361	0.0138279	0.0771528	0	0.353276	0.393253	0.178977	1.9396
809	2014-06-25	21.125	86.625	99.9317	3.66373	1.04998	0.00938931	0.0263468	0.0126834	0.0859232	0	1.07071	0.807876	0.538448	2.57563	2.67118
810	2014-06-28	23.7208	61.9167	100.772	2.95639	0.733733	0.0477668	0.0541343	0.0137952	0.0778178	0	1.92373	0.406729	0.702341	1.83833	1.92449
811	2014-07-01	25.825	69.7083	99.2004	3.16519	0.62812	0.0487553	0.661417	0.0607657	0.0446472	0	3.30267	0.547901	0.861649	1.81514	2.01717
812	2014-07-04	18.5833	51.9583	100.82	1.29925	0.232947	0.0535626	0.0249508	0.0115076	0.0804067	0.0353308	0.209105	0.103101	0.108707	1.63976
813	2014-07-07	21.6583	80	99.0758	3.36873	0.315688	0.0504573	0.195435	0.0179309	0.0869919	0.0861406	2.96998	1.10462	1.32354	2.31209	2.40523
814	2014-07-10	18.1583	56.2917	100.748	4.79194	0.812265	0.0488437	0.0271974	0.0155318	0.109963	0.0251088	0.298712	0.396112	0.164129	2.31668
815	2014-07-13	24.3	66.0833	99.5704	3.35564	0.310964	0.0289461	0.0523271	0.0105546	0.0187878	0	3.47804	0.597404	1.29983	1.91737	1.94184
816	2014-07-16	17.6583	68.9167	99.7542	2.77628	1.08699	0.0206833	0.011684	0.0113816	0.0551827	0	0.289406	0.169903	0.117843	2.25301	2.64423
817	2014-07-19	18.8042	78.4167	100.801	2.78845	0.775708	0.0168075	0.0500137	0.00699208	0.0223639	0	1.72481	1.00321	0.915029	2.38846	2.42858
818	2014-07-22	24.5583	65.9167	100.364	5.36162	1.6315	0.017499	0.0666788	0.0195158	0.134641	0	6.54131	3.08787	3.06822	2.17779	2.21649
819	2014-07-25	19.8375	55.5833	100.248	3.97673	0.973096	0.0132778	0.0307153	0.0255716	0.156151	0	1.10735	0.288981	0.398898	2.1083
820	2014-07-31	19.6625	64.1667	100.24	3.84575	1.22774	0.0122256	0.0375566	0.0133839	0.0742698	0	1.08373	0.48807	0.477149	2.22988	2.34189
821	2014-08-03	22.2208	69.125	100.522	3.13294	1.64302	0.0150009	0.0956679	0.0127915	0.0540445	0	2.01973	0.916836	0.955307	2.08134	2.14789
822	2014-08-06	20.975	61.5	100.218	2.48391	0.28942	0.00905053	0.0398785	0.00923673	0.0727885	0	0.464592	0.342176	0.231825	1.90623	2.20855
823	2014-08-09	21.8083	55.9583	100.748	3.52853	0.57292	0.00946872	0.0416972	0.0116954	0.069021	0	0.534332	0.25805	0.216111	1.94945
824	2014-08-15	17.75	54.6667	99.9267	2.48958	0.983757	0.010953	0.0188671	0.0156981	0.103319	0	0.269773	0.364733	0.173987	2.02188
825	2014-08-21	21.0417	84.3333	100.035	4.15599	0.642649	0.0380443	0.0508772	0.013441	0.0981435	0	2.3596	2.53035	1.49839	2.60892	2.66903
826	2014-08-24	20.8609	72.0435	100.765	1.83936	0.255073	0	0.0152636	0.002859	0.019067	0	0.5972	0.284057	0.236533	1.91389	1.95454
827	2014-08-27	20.85	60.3333	100.365	1.26559	0.362384	0	0.0081533	0.00784017	0.0674269	0	0.400444	0.119986	0.132286	1.58747	1.82533
828	2014-08-30	22.9542	71.3333	100.17	1.77316	0.728225	0.0226702	0.0744151	0.0134648	0.0660837	0	1.92644	0.441203	0.741156	1.78631	1.86721
829	2014-09-02	21.0125	89.2083	99.6379	4.97164	0.393078	0.0195164	0.0285321	0.00887613	0.0618443	0	2.54221	1.53222	1.31984	2.78564	2.82207
830	2014-09-05	24.4458	75.75	100.092	2.21427	1.46668	0.0215734	0.02742	0.0150005	0.0734157	0	3.68577	0.566314	1.32809	1.86558	1.90873
831	2014-09-08	18.5458	70.4167	100.961	1.734	0.973474	0	0.0160054	0.00974682	0.0804428	0	0.517682	0.206463	0.199296	1.99642	2.21753
832	2014-09-11	16.45	74.75	99.7217	1.15365	1.01425	0	0.00426926	0.00301527	0.0293974	0	0.305165	0.085	0.106	1.99602	2.10601
833	2014-09-17	14.975	64.9583	100.187	3.11134	0.82501	0.0138872	0.0392789	0.0257833	0.151235	0.00756947	0.966225	0.622665	0.444096	2.44054	2.6727
834	2014-09-26	17.4375	68.4167	101.223	3.54256	1.23556	0.0260647	0.0290018	0.0231594	0.176893	0.00746934	1.11417	1.43944	0.692837	2.46646	2.64902
835	2014-09-29	19.3917	69.5833	100.053	3.91263	2.10288	0.028878	0.0477995	0.0182442	0.140827	0.0206748	2.27149	1.4581	1.16964	2.39083	2.47992
836	2014-10-02	16.4167	88.5417	100.418	1.47753	0.890021	0.0246448	0.0350586	0.00790206	0.0643137	0.00768006	3.0331	2.32816	1.82237	2.51014	2.5561
837	2014-10-05	9.5125	63.7917	99.2429	1.38538	0.619289	0.0587782	0.0792213	0.0054693	0.058697	0.105529	0.705203	0.321389	0.341919	2.37895	2.61357
838	2014-10-08	11.5708	67.875	99.4408	1.54452	0.376492	0	0.0230819	0.011975	0.065036	0	1.04093	1.09219	0.656732	2.41631	2.50481
839	2014-10-11	8.8625	66.2917	100.762	1.41969	1.2749	0.0078308	0.0196032	0.00785824	0.0568837	0.00261423	0.198139	0.2802	0.106832	2.588	2.75238
840	2014-10-17	13.7583	82.1667	98.6758	2.29552	0.555357	0.0107011	0.0318253	0.0128505	0.061953	0.000990354	2.12528	1.32145	1.10403	2.66089	2.70814
841	2014-10-20	9.28333	83.8333	99.74	1.65449	0.115421	0.026113	0.0460499	0.0157776	0.0715477	0.00531502	1.41749	1.06918	0.750376	2.80727	2.89586
842	2014-10-23	10.775	66.875	100.614	1.37719	0.427335	0	0.0146136	0.00922011	0.040395	0	0.387333	0.221189	0.172635	2.30108	2.46458
843	2014-10-26	10.0875	63.125	99.4092	1.25152	0.147346	0	0.0141738	0.0103135	0.0361801	0	0.208199	0.120735	0.0706327	2.20436	2.57852
844	2014-11-04	11.2292	75.5	99.9504	2.67251	0.573473	0.0183879	0.0562878	0.0184044	0.0819764	0.00674648	0.904719	0.671881	0.455998	2.77318	2.8953
845	2014-11-07	3.025	72.2083	99.9679	1.21439	0	0	0.00868433	0.00796651	0.0362728	0	0.145833	0.130476	0.0551706	2.77396	3.16772
846	2014-11-13	0.716667	74.25	100.5	2.86148	0.30496	0.00187152	0.0207017	0.01808	0.066345	0.00583379	0.645161	1.0135	0.487403	3.46826	3.54974
847	2014-11-16	0.0208333	77.4583	100.569	1.24588	0.138189	0.0158028	0.0506922	0.00797037	0.018381	0.0646755	1.99103	7.06959	2.78295	3.238	3.2717
848	2014-11-22	1.68333	80.75	100.492	1.19236	0.500762	0.0847443	0.0795581	0.0131575	0.0599383	0.0216921	1.98777	3.54455	1.72606	3.08294	3.1826
849	2014-11-25	2.99167	66.2083	99.8658	1.28571	0	0	0.0125444	0.0217057	0.0766452	0	1.48034	0.852305	0.730153	2.76505	2.85474
850	2014-11-28	-3.55417	63.7917	100.931	2.45562	0.82379	0.0520094	0.0166883	0.0140292	0.134247	0.0199502	1.02496	0.632329	0.422741	3.45454	3.61594
851	2014-12-01	0.670833	60.1667	101.324	0.955131	0.35192	0.0690709	0.0215037	0.0300015	0.184428	0.0861777	1.06514	0.368376	0.424948	2.65585	2.99447
852	2014-12-04	-1.53636	61.4545	101.49	2.89842	0.947181	0.0694353	0.0323462	0.012232	0.204998	0.00607089	1.25635	1.3758	0.697749	3.39912	3.58309
853	2014-12-07	-2.68333	56.8333	102.521	0.981735	0.22406	0.00991758	0.0175535	0.0027584	0.0423425	0	0.806395	0.299762	0.389092	2.88012
854	2014-12-10	-1.47917	73.0833	100.343	0.689816	0.115658	0.0425608	0.0424466	0.00401091	0.0600217	0.0268368	1.34119	0.535519	0.629602	2.83478	2.95012
855	2014-12-13	2.3125	86.2917	100.318	3.39578	0.165526	0	0.0291446	0.00110366	0.0223461	0	2.16761	3.5209	1.85255	3.65394	3.66857
856	2014-12-16	3.60417	98.2917	99.5633	1.84388	0.0608984	0	0.0257785	0.00245016	0.0204727	0	1.87612	2.20496	1.41215	4.02078	4.03981
857	2014-12-19	-2.575	76.25	100.857	1.37465	0.173059	0.103875	0.0787124	0.00393652	0.0318926	0.0715727	0.386873	0.366164	0.203983	3.34182	3.6214
858	2014-12-22	1.21	76.7	100.697	1.3549	0.438537	0.105744	0.126428	0.00388082	0.0388245	0.0783333	2.98905	2.92036	2.00294	3.09971	3.18595
859	2014-12-25	5.03333	71.6667	99.2658	1.83814	0.203922	0	0.0123916	0.0080433	0.03123	0	0.888403	0.41914	0.474202	2.89123	2.93839
860	2014-12-31	-6.57083	59.125	100.927	1.21158	0.130962	0.0607529	0.0459217	0.00982803	0.0627702	0.0217401	1.03053	0.884711	0.568206	3.26584
861	2015-01-03	-0.316667	85.0833	100.765	0.383768	0.290579	0.00519398	0.00610936	0.00299037	0.0360797	0	0.142877	0.332737	0.140601	2.82073	2.9566
862	2015-01-06	-9.6625	69.125	100.667	1.47668	0.301391	0.245276	0.034291	0.00827891	0.0335376	0.246746	1.6778	3.32866	1.52545	3.7599	3.92027
863	2015-01-09	-8.37917	71.6667	99.7767	1.21435	0.546919	0.0768862	0.023102	0.0092012	0.032409	0	0.921088	0.98085	0.551602	3.55865	3.6736
864	2015-01-12	-3.125	79.75	101.188	0.957848	0.431844	0.0473111	0.0502397	0.00493878	0.0350079	0.0775801	1.67632	2.72932	1.39187	3.26205	3.3354
865	2015-01-15	-7.00417	71.75	100.238	0.716546	0.46983	0.151336	0.0902532	0.0143701	0.0495985	0.213519	3.32387	9.60379	3.99517	3.27041	3.44275
866	2015-01-18	3.6875	81.25	99.0867	1.76278	0.203326	0.00112192	0.0336649	0.00159033	0.0113664	0.0315479	1.48492	1.88462	1.20166	3.18887	3.20772
867	2015-01-21	-6.17917	72.1667	100.601	1.5268	0.841086	0.134348	0.0412448	0.0177717	0.0586869	0.0242239	0.983971	1.53986	0.700541	3.53166	3.68937
868	2015-01-24	-1.60417	85.375	98.8042	2.23711	0.152614	0.0166115	0.0756583	0.00261426	0.0119771	0.0324022	3.88487	9.05635	4.07126	3.70543	3.72697
869	2015-01-30	-8.60833	69.7917	100.762	0.611279	0.493402	0.0550493	0.0177935	0.00632141	0.0171982	0.0238583	0.965655	0.488416	0.474701	3.16239	3.27954
870	2015-02-02	-13.0875	78.2917	99.7425	0.559569	0.225377	0.127188	0.0191639	0.019863	0.0702307	0.0684605	0.571087	0.327158	0.209046	3.53324
871	2015-02-05	-10.6091	61.9545	100.996	1.23665	0.307068	0.217951	0.0296891	0.015336	0.0193443	0.0728338	0.86785	0.684403	0.385827	3.54284
872	2015-02-08	-9.3875	88.4167	99.8658	0.338299	0.263372	0.121325	0.0514593	0.0117137	0.0161961	0.0488163	1.10575	1.22264	0.713315	3.24306	3.52104
873	2015-02-11	-3.38333	82.375	100.115	0.61964	0.0233146	0.078018	0.0717306	0.00729992	0.0220168	0.0559976	2.76249	4.32177	2.35361	3.22924	3.31952
874	2015-02-14	-9.4375	71.7917	99.1613	0.283977	0.025967	0.240127	0.0443161	0.0464983	0.025343	0.263018	1.2614	2.50887	1.16238	3.04552	3.48977
875	2015-02-20	-17.1417	54.25	101.142	1.45462	0.361244	0.816783	0.0482401	0.0426302	0.0668232	0.869508	1.37924	0.992396	0.524502	3.53558
876	2015-02-23	-16.875	56.75	101.805	0.973773	0.169887	0.205035	0.0399345	0.0411238	0.0445801	0.0660786	1.51582	0.596573	0.55136	3.68109
877	2015-03-01	-5.40833	72.2083	101.37	0.636827	0.685017	0.292568	0.133354	0.0229583	0.0620929	0.0664041	4.29049	8.26015	3.73079	2.7455	3.19023
878	2015-03-04	-0.808333	67.7083	99.7025	1.42577	0.629599	0.126764	0.0639543	0.0198039	0.0418812	0	2.2848	3.51729	1.79592	3.11254	3.22402
879	2015-03-07	-2.95	71.9167	100.328	1.1193	0.703808	0.151023	0.140165	0.0177583	0.0538853	0	3.51688	11.1261	4.38298	3.16584	3.30959
880	2015-03-10	2.51667	77.0417	100.375	1.9164	0.655196	0.109456	0.200248	0.0166378	0.0697084	0	4.25088	15.8961	6.05911	3.20964	3.29083
881	2015-03-13	1.61667	54.5	101.36	1.84589	0.794355	0.142895	0.0356779	0.0152747	0.0760938	0.0398665	0.480183	1.30335	0.422746	3.00489
882	2015-03-19	-1.50833	43.75	101.287	1.95251	0.717165	0.0422253	0.00607653	0.0163218	0.0873237	0.0112232	0.448383	0.84027	0.304853	3.07286
883	2015-03-22	-5.17083	48.4583	100.977	0.731628	0.107275	0.319887	0.0195496	0.0395755	0.0604094	0.399652	0.867462	0.224262	0.251882	2.68376
884	2015-03-25	1.90833	85.25	100.287	2.35639	0.485411	0.0822907	0.0442833	0.0212323	0.0444098	0	1.83473	3.21916	1.46653	3.45658	3.52133
885	2015-03-28	-5.10417	41.0833	100.76	0.741822	0.0650646	0.0257585	0.00177948	0.00989622	0.0250407	0	0.519175	0.189994	0.208385	2.5686
886	2015-03-31	1.55417	64.9167	99.7562	1.97245	0.49006	0.101648	0.0242958	0.0138893	0.0775631	0.086565	0.70521	1.04155	0.430578	3.10675	3.28313
887	2015-04-03	7.87083	80.6667	99.5304	2.9437	0.1985	0.0240444	0.0225381	0.00771577	0.0428038	0.00605925	1.04746	1.85251	0.875117	3.14948	3.19417
888	2015-04-06	3.61667	72.125	100.833	1.59995	0.595304	0.0202397	0.0372075	0.0102302	0.0574454	0.00284898	1.56898	3.19055	1.39684	2.9765	3.03242
889	2015-04-12	10.7	51	100.915	3.11822	0.717027	0.0562556	0.0649337	0.0114609	0.0618206	0.0368008	1.80307	3.26133	1.56216	2.66418
890	2015-04-15	10.5958	32.3333	101.368	2.48154	0.560786	0.120903	0.0398915	0.016192	0.111344	0.0495954	0.269677	0.718407	0.22257	2.28978
891	2015-04-18	14.3042	43.8333	100.365	2.74877	0.52956	0.0512359	0.0316358	0.0196516	0.117694	0.0476868	0.613224	0.839357	0.416168	2.19959
892	2015-04-21	7.8125	71.25	98.7579	2.68527	0.30623	0.0606849	0.0213288	0.0102459	0.0479872	0.0646183	0.810168	1.06467	0.549969	2.95506	3.05047
893	2015-04-24	2.925	54.625	100.158	1.13972	0.10711	0.0480975	0.0188287	0.00932199	0.0473627	0.0434553	0.549703	0.17744	0.223708	2.52854
894	2015-04-30	12.9042	54.25	99.6021	3.55575	0.981303	0.0254982	0.0319756	0.0159377	0.102295	0.00540277	0.666113	1.51763	0.622764	2.64529
895	2015-05-03	17.5792	42.0833	100.269	8.12694	1.43926	0.0502131	0.0708297	0.0251663	0.148276	0	2.65836	3.21639	1.81179	2.58179
896	2015-05-06	15.85	41.3333	101.066	5.57745	1.2997	0.126436	0.0415424	0.0142776	0.0925351	0.142438	0.638972	0.834636	0.406765	2.47461
897	2015-05-09	20.8667	60.4167	100.355	9.1327	1.66177	0.0815294	0.085925	0.0250289	0.164242	0.0337513	4.13088	4.69987	2.74503	2.63264	2.69652
898	2015-05-12	14.5083	68.7917	99.7512	5.15633	0.614201	0.0258662	0.0170581	0.0112065	0.0624483	0.027647	1.10071	1.55465	0.786704	2.83358	2.8964
899	2015-05-15	11.8792	58.625	100.659	4.21179	0.526143	0.0201549	0.0343071	0.0161211	0.0981104	0.00619819	1.14707	1.93994	0.844467	2.78964
900	2015-05-18	20.3625	68.5417	100.158	5.25277	1.1283	0.0348498	0.154031	0.0223031	0.0867015	0	2.81224	2.15801	1.45732	2.44739	2.52472
901	2015-05-21	14.0591	35.5909	99.9436	3.44761	0.452934	0.0506976	0.0326219	0.0196507	0.0891581	0.0360568	1.12199	0.838682	0.582585	2.22736
902	2015-05-30	20.0625	77.5833	100.114	4.75645	0.557935	0.00176165	0.0240804	0.0115855	0.071412	0	1.73431	1.39279	0.999844	2.55346	2.60414
903	2015-06-02	13.6125	69.4167	100.885	3.68343	0.555357	0	0	0.00737709	0.0405083	0	0.495274	0.940182	0.41502	2.75389	2.81774
904	2015-06-05	18.7792	76.9167	100.185	4.65655	0.616432	0.0180257	0.0352843	0.00827823	0.0658159	0	2.20647	2.96811	1.56855	2.66008	2.69685
905	2015-06-08	19.2167	86.5417	99.0071	3.67983	0.481665	0.0245429	0.0277506	0.00240007	0.0137407	0	2.20701	1.35866	1.17058	2.67373	2.69516
906	2015-06-11	19.2375	65	99.9083	3.77549	0.427179	0.00261198	0.0398568	0.00502055	0.0299682	0	0.754507	0.536859	0.398185	2.2428	2.31187
907	2015-06-14	17.5333	79.4167	100.197	2.87378	0.308718	0.00627477	0.0370716	0.000740811	0.00371807	0	1.05896	0.960422	0.689252	2.50171	2.5256
908	2015-06-17	18.2625	47.5417	100.627	1.86289	0.253584	0.0123527	0.0133102	0.00100538	0.012938	0	0.206641	0.0251403	0.0626536	1.75719
909	2015-06-20	17.7	59.5417	100.054	2.68858	0.288568	0.0221827	0.0233037	0.0032737	0.0305221	0	0.596288	0.224873	0.257028	2.08598
910	2015-06-23	21.575	71.125	99.5333	3.36888	0.354227	0.0336886	0.022037	0.00346661	0.0171059	0.00900119	0.828889	0.233707	0.306657	2.12711	2.18873
911	2015-06-26	19.7875	58.7917	100.462	2.61874	0.376194	0.0200703	0.0419672	0.00300222	0.0316739	0	0.36151	0.280579	0.172297	1.95693
912	2015-06-29	18.8917	71.0833	99.7871	3.22547	0.443841	0.0253073	0.0254057	0.00225932	0.0175916	0	0.835995	0.343596	0.365367	2.26586	2.32183
913	2015-07-02	17.9917	55.8333	100.117	1.52369	0.0872605	0.00503918	0.0533156	0.00417274	0.0150594	0	0.458409	0.103502	0.158468	1.76559
914	2015-07-05	21.6875	62.75	100.533	4.84976	0.979025	0.0190291	0.182609	0.0157028	0.0495992	0	2.53728	0.95216	1.12627	2.20585	2.27753
915	2015-07-08	17.9625	65.4583	100.446	3.36758	0.267396	0.00179273	0.160616	0.00204843	0.0241912	0	0.252171	0.178091	0.152768	2.24734	3.03517
916	2015-07-11	22.8292	60.7917	100.586	5.81269	0.964565	0.0140044	0.0607888	0.00496533	0.0602923	0	1.89158	0.588435	0.782255	2.18694	2.23944
917	2015-07-14	22.5708	80.5	98.7446	3.13962	0.31307	0.0153182	0.0288126	0.00362374	0.0208152	0	1.84977	0.59248	0.731462	2.21657	2.24267
918	2015-07-17	18.625	83.0833	99.8962	4.36232	0.635249	0.0234392	0.0340676	0.00581144	0.0347891	0	1.04492	0.813389	0.582145	2.70691	2.76552
919	2015-07-20	23.6875	60.4167	99.3292	3.5745	0.797541	0.0054998	0.0242709	0.0059621	0.0395537	0	1.14846	0.148584	0.397944	1.90341	1.95128
920	2015-07-23	21.4625	45.375	100.05	2.38645	0.226398	0.010422	0.0223908	0.0116177	0.0708607	0	0.331046	0.0811954	0.129637	1.68651
921	2015-07-26	24.5458	60	99.9962	3.2456	0.432532	0.0150238	0.0318587	0.00614166	0.0559795	0	1.47885	0.123055	0.471371	1.80378	1.85962
922	2015-07-29	26.8292	58.1667	99.9604	5.53459	1.48373	0.0944516	0.103871	0.0240327	0.142445	0.0691968	3.8665	0.682117	1.50584	1.9265
923	2015-08-01	21.8875	57.7083	99.6346	2.9616	0.40954	0.0789107	0.0333776	0.0100595	0.0359161	0.0569318	0.341932	0.119367	0.14501	1.88451
924	2015-08-07	20.1458	62.875	100.177	2.55451	0.520696	0.0225405	0.0115671	0.010085	0.0499157	0	0.603308	0.118828	0.213079	1.96711	2.1134
925	2015-08-10	18.9042	79.0417	99.8354	3.48124	0.745104	0.0266081	0.0217061	0.0129238	0.0785226	0	1.15997	0.698775	0.560354	2.47841	2.58195
926	2015-08-13	20.325	62.625	100.306	2.81817	0.498746	0.0277019	0.0210091	0.0187417	0.112678	0.0038291	0.798868	0.163605	0.285176	1.99823	2.25579
927	2015-08-16	24.7917	69.7083	100.535	4.15338	1.28547	0.031157	0.0589444	0.0135368	0.0452266	0	3.06982	0.65028	1.28376	2.05699	2.09494
928	2015-08-19	24.4417	79.25	99.7633	1.9926	0.423337	0.019206	0.0204155	0.0122532	0.0542358	0	2.565	0.834174	1.01721	1.90199	1.94481
929	2015-08-22	19.1917	66.7083	100.773	4.11119	0.568428	0.0184111	0.0265351	0.0102831	0.0392066	0	0.274272	0.302168	0.165307	2.30166	2.69328
930	2015-08-25	17.825	62.75	99.8608	3.28464	0.182961	0.0396348	0.0184491	0.0102768	0.0406438	0.0188979	0.369201	0.0944024	0.15531	2.1974	2.54794
931	2015-08-28	18.3875	69.7083	100.815	4.54187	0.325196	0.0318928	0.0273967	0.014132	0.0749673	0	1.80783	0.714709	0.717916	2.43315	2.50422
932	2015-09-03	25.2625	73.2083	100.025	5.23299	0.659737	0.0268744	0.0825029	0.0210576	0.134205	0	4.47495	2.25099	2.16061	2.22109	2.27402
933	2015-09-06	25.3	71.9167	100.521	4.16946	0.456026	0.0506092	0.0901275	0.0125876	0.0515193	0.00365707	5.55097	1.75876	2.32048	2.07346	2.10567
934	2015-09-12	13.6583	81.8333	99.72	1.51944	0.0635688	0.0167977	0.0121935	0.00397771	0.00669122	0.0124602	0.29004	0.052257	0.154365	2.39399	2.49771
935	2015-09-15	20.0208	67.625	101.109	5.33965	0.950501	0.0237201	0.0399925	0.0258903	0.118708	0	2.69949	1.07383	1.20153	3.04791	2.4892
936	2015-09-18	21.8708	68.6667	99.9625	4.68275	0.697819	0.0372296	0.0613855	0.0207865	0.113908	0.00731293	3.08247	1.59971	1.46479	2.2759	2.34443
937	2015-09-21	15.6708	68.0417	100.955	3.58275	0.474843	0.109412	0.0128837	0.00851517	0.0480399	0.00233924	0.2807	0.330125	0.204004	2.48257	3.11433
938	2015-09-24	19.1913	75.8261	101.393	4.14385	0.506872	0.0336109	0.0383164	0.0167384	0.113598	0.0202496	2.60411	0.684472	1.0484	2.445	2.51545
939	2015-09-30	14.2136	59.3636	100.576	1.94467	0.243089	0.00959805	0.0135442	0.00771429	0.0349888	0.00422614	0.238421	0.0573294	0.135934	2.13086
940	2015-10-03	10.1375	54.875	101.55	1.66624	0.0941605	0.231848	0.0114371	0.00517301	0.00607056	0.00909621	0.227177	0.0921202	0.0603897	2.22186
941	2015-10-06	14.7958	75.5417	100.526	3.29823	0.155496	0.00151164	0.0118994	0.0066596	0.0262647	0.00578805	0.891954	0.663829	0.415531	2.61069	2.65237
942	2015-10-09	12.5542	81.7083	99.8912	3.56445	0	0	0.0154857	0.00851031	0.0396977	0.00309	1.28272	1.13745	0.6821	2.92153	2.95644
943	2015-10-12	17.7833	65.75	98.9296	2.56219	0.345546	0.0214566	0.0370368	0.0122551	0.0447515	0	1.63164	0.370884	0.610289	2.13439	2.19529
944	2015-10-15	10.9625	67.875	99.7267	3.49548	0.366852	0.0120972	0.0402751	0.0150618	0.0539007	0	0.568561	0.660582	0.349395	2.82826	2.95821
945	2015-10-18	3.05	63.9167	101.384	1.21577	0.325271	0.0149968	0.02438	0.00958313	0.0298988	0.00135757	0.603653	0.264888	0.279419	2.7242	2.83113
946	2015-10-21	11.2083	77.1667	100.873	4.43417	0.362415	0.0301491	0.0503305	0.0179168	0.101052	0.00469484	0.785946	1.17493	0.514431	3.06791	3.18914
947	2015-10-24	10.4083	79.4583	100.186	2.52188	0.369164	0.0260671	0.0359876	0.0129505	0.0522827	0	0.794212	0.438303	0.339475	3.38638	2.94075
948	2015-10-27	8.46667	70	101.689	1.38159	0.327832	0.0100433	0.0214249	0.0121658	0.0474893	0	0.156513	0.267301	0.0924101	2.55016	2.97604
949	2015-10-30	6.65417	68.5	100.262	1.74774	0.11529	0.0213226	0.0369601	0.014032	0.0660849	0.00652433	0.218415	0.223567	0.0911645	2.707	3.32336
950	2015-11-05	14.9864	80.6364	100.46	6.39592	1.23122	0.0486669	0.112549	0.0248817	0.186513	0.0146123	2.34752	9.25165	3.29361	3.10078	3.15652
951	2015-11-08	6.52917	69.2917	101.386	3.16189	0.130279	0.0123399	0.0361425	0.0105021	0.0361567	0	0.557426	0.46114	0.28117	3.03206	3.13354
952	2015-11-11	9.5875	86.25	99.9946	2.91686	0.0759454	0.0205421	0.0620798	0.0184546	0.109405	0	1.60046	5.00878	1.86516	3.16737	3.2279
953	2015-11-14	4.04583	65.125	100.679	1.92697	0.18939	0.0013316	0.0166162	0.00956315	0.0269934	0	0.216616	0.158139	0.0900727	2.91578	3.0889
954	2015-11-17	6.03333	79.375	101.404	2.18645	0.13124	0.0106499	0.0302558	0.0107583	0.0385591	0	0.294123	0.367066	0.161697	3.07893	3.2321
955	2015-11-20	4.82609	47.3913	100.645	2.72223	0.295827	0.0109606	0.0287228	0.0163744	0.145639	0.00766932	0.506871	0.503082	0.22425	2.80631
956	2015-11-23	-0.520833	72.7917	100.607	1.87198	0.202471	0.0280543	0.0336871	0.014896	0.0728993	0.00921736	0.706224	1.89541	0.684054	3.34734	3.44397
957	2015-11-26	10.8208	60.6667	101.608	1.28677	0.130993	0.0395936	0.0416128	0.0171229	0.0843222	0	1.14183	0.829693	0.596459	2.22827	2.40313
958	2015-11-29	0.865217	72.6087	101.44	2.11618	0.505623	0.0771371	0.0268689	0.00294471	0.0245063	0.0389475	0.761859	0.825181	0.417698	3.26325	3.34804
959	2015-12-02	5.92083	74.25	99.5517	2.69295	0.159171	0.0179555	0.0233278	0.0129728	0.106997	0.0251881	0.971033	2.46174	0.908699	3.13609	3.21454
960	2015-12-05	4.52917	83.0417	102.329	1.99186	0.0709201	0.0253312	0.0707452	0.00569482	0.00321412	0.0424913	3.31162	8.90864	3.55615	3.19282	3.21672
961	2015-12-08	5.16667	77.0833	100.442	1.26495	0.24068	0.0513538	0.0676099	0.0115576	0.0829033	0.0384675	3.65806	6.50755	3.001	2.80708	2.88428
962	2015-12-14	10.1917	84.9583	98.7417	3.62572	0.102561	0.0141869	0.0361633	0.00771345	0.0601423	0.0205167	1.16078	1.51304	0.740624	3.59246	3.2145
963	2015-12-17	6.90833	73.0833	99.2579	2.17827	0.0769515	0.0510585	0.0483704	0.00957743	0.0846689	0.0700158	1.03283	1.52242	0.752024	2.94396	3.05033
964	2015-12-20	1.54167	61.125	101.227	1.46981	0.541906	0.010044	0.0231053	0.00278584	0.0230176	0.0193864	0.634549	1.26762	0.548471	2.96481	3.01779
965	2015-12-23	10.2412	87.1176	99.3988	2.84677	0.403806	0.0333193	0.0325397	0.00467078	0.0414014	0.0310527	0.997214	2.19974	0.941441	3.13312	3.17906
966	2015-12-26	3.45	79.9583	101.499	0.626859	0.204264	0.0368474	0.0236943	0.00182628	0.0295063	0.0682911	0.594105	0.471001	0.328678	2.65781	2.76656
967	2015-12-29	3.01667	93.4583	99.8962	0.756235	0.391913	0.00301843	0.0122758	0.00110058	0.0100342	0.0350211	0.450534	1.03024	0.441458	3.15154	3.17846
968	2016-01-13	-7.62917	65.75	99.9029	1.46975	0.401668	0.264835	0.0460007	0.00685541	0.0553005	0.203858	0.514334	0.977747	0.396765	3.58744	3.94974
969	2016-01-16	0.85	76.25	98.7075	1.35817	0.0638121	0.0902929	0.0470054	0.00546578	0.0618189	0.0858545	0.890498	0.782501	0.534533	3.11006	3.25565
970	2016-01-19	-6.975	69.375	100.848	1.61786	0.294294	0.255516	0.0195489	0.00559335	0.0350961	0.26141	0.301419	0.379097	0.143835	3.62987	4.31541
971	2016-01-22	-4.20833	56.875	101.214	1.72577	0.551497	0.375319	0.0276878	0.00775865	0.0878857	0.369155	0.37833	0.718292	0.235762	3.33925
972	2016-01-28	0.616667	77.7083	99.0354	1.11611	0.0727003	0.0365338	0.0447824	0.00665758	0.0441121	0.0539756	1.76075	4.29633	1.76139	3.09157	3.1532
973	2016-01-31	6.24583	78.7917	99.0167	3.35629	0.362764	0.0662241	0.0852336	0.00793121	0.0416011	0.0767938	1.33133	4.13659	1.60869	3.29527	3.34763
974	2016-02-03	7.65417	75.0833	99.0629	2.85132	0.308259	0.0230896	0.0247168	0.00551576	0.0539262	0.0285146	0.659064	0.920946	0.505242	3.0569	3.13352
975	2016-02-06	1.76667	60.0417	100.801	1.79366	0.345549	0.0288285	0.0306748	0.00544093	0.0466637	0.0165661	0.92106	3.54763	1.31905	3.08845	3.14733
976	2016-02-09	-0.291667	85.625	98.5758	1.56354	0.333747	0.0634008	0.0367021	0.00299875	0.0318553	0.0562411	1.40894	1.69075	1.01264	3.42778	3.48782
977	2016-02-12	-7.40833	64.5	100.114	1.41189	0.321838	0.117691	0.0238541	0.00691942	0.0666213	0.0341044	0.491783	1.42683	0.491112	3.56238	3.77527
978	2016-02-15	-4.4875	75.125	100.522	0.859497	0.523613	0.147409	0.0417476	0.00482971	0.0255716	0.0460247	1.59262	1.8796	1.06314	3.16163	3.30515
979	2016-02-18	-7.22917	60.625	101.976	1.17269	0.483873	0.468532	0.0192474	0.0164879	0.0785252	0.446784	0.502635	0.831639	0.281315	3.33683	4.22728
980	2016-02-21	3.81667	61.625	100.211	1.16446	0.281837	0.0577573	0.0124771	0.00568798	0.0344914	0.0533495	0.517867	0.329379	0.255949	2.64272	2.81787
981	2016-02-24	0.9125	89.625	99.1637	0.8683	0.394836	0.0461997	0.0403344	0.00370711	0.026335	0.0290969	0.493465	0.922146	0.432397	3.19773	3.30269
982	2016-02-27	1.25	64.5833	99.8171	2.23362	0.652528	0.0767258	0.0350553	0.00599856	0.0487093	0.0250937	1.19016	2.37181	1.0794	3.20577	3.28731
983	2016-03-01	-7.38333	73.6667	100.078	1.72467	0.338556	0.159329	0.0187926	0.0161293	0.0391265	0.115562	0.302461	0.302148	0.105301	3.73048	4.14702
984	2016-03-07	6.71667	68.5833	100.16	5.76136	0.168797	0.17293	0.0739819	0.0216296	0.149614	0.04449	2.87128	5.1002	2.22573	3.32669	3.41053
985	2016-03-16	7.1	84.125	99.2987	2.25179	0.312847	0.0249202	0.0242409	0.00498597	0.0515079	0.0233273	0.774419	1.08966	0.595935	3.13373	3.1988
986	2016-03-19	-1.4125	47.875	100.925	1.39685	0.33757	0.0504896	0.0166268	0.00908069	0.0685778	0.0392471	0.200854	0.303504	0.120759	2.95787
987	2016-03-22	2.225	73	99.9967	3.36392	0.997149	0.0639483	0.0460332	0.0137469	0.0979047	0.0576217	0.850789	2.39749	0.922078	3.44616	3.53657
988	2016-03-25	0.579167	81.6667	99.7779	0.974699	0.124058	0.032731	0.026429	0.00852766	0.0122958	0	1.91039	0.641898	0.785099	2.95646	3.00547
989	2016-03-28	6.52083	82	98.9679	1.51199	0.29199	0.0232469	0.0296808	0.00817644	0.0143574	0	1.69444	0.558586	0.715622	2.83592	2.87518
990	2016-03-31	10.475	85.5	98.6942	1.61728	0.525831	0.0397699	0.0318219	0.00912013	0.0339673	0.0109461	1.27086	0.365358	0.510072	2.72292	2.7954
991	2016-04-03	-2.74444	69.0556	99.8206	0.867896	0.324297	0.0363685	0.0105555	0.00677222	0.00843148	0	0.797554	0.121866	0.268832	2.91785	2.98827
992	2016-04-06	1.1	75.875	99.9267	2.16348	0.755565	0.0420485	0.0199631	0.00776586	0.0321729	0	1.0776	0.377209	0.405222	3.24677	3.30678
993	2016-04-12	3.37917	64.875	100.791	1.65867	0.398492	0.0343039	0.0201724	0.0103136	0.0383132	0.0210529	0.739426	0.457783	0.363389	2.87665	2.98189
994	2016-04-15	8.74583	35	101.575	1.79663	0.675251	0.0416306	0.0324961	0.0103887	0.0444211	0.0148004	0.946999	0.516821	0.457013	2.187
995	2016-04-18	16.7	36.8333	101.041	4.22176	0.741544	0.072394	0.0885794	0.0312442	0.186929	0.0246904	2.23374	2.2406	1.34005	2.23313
996	2016-04-21	11.3292	48.75	100.067	5.87152	0.589611	0.062675	0.0582803	0.0285871	0.200944	0.0282971	1.04816	2.13181	0.757881	2.88218
997	2016-04-24	6.92917	39.3333	100.65	2.59731	0.676686	0.0321969	0.0336341	0.00967697	0.0292291	0	0.993211	0.360694	0.456782	2.50082
998	2016-04-27	6.31818	43.4091	100.15	1.77519	0.16645	0.0402471	0.0229354	0.012369	0.0392936	0	0.719437	0.612736	0.401407	2.46407
999	2016-04-30	10.1333	36.75	100.791	3.6152	0.432303	0.0573941	0.0293763	0.0178927	0.0972499	0.00876322	0.394127	0.849538	0.302414	2.55919
1000	2016-05-03	10.1792	67.5833	99.8188	4.67757	0.336586	0.0407997	0.0314789	0.025898	0.187631	0.00768565	0.547557	3.06562	0.896761	3.10449	3.25184
1001	2016-05-09	9.89583	51.25	100.497	1.92619	0.484818	0.0341288	0.0245502	0.0136589	0.0706911	0.0226174	0.787148	0.594033	0.450139	2.38858
1002	2016-05-15	5.1125	61.2083	99.805	4.52742	0.783589	0.0365201	0.0418332	0.025288	0.188777	0.0159276	0.585668	0.397319	0.287738	3.23585	3.53006
1003	2016-05-18	11.6708	51.375	100.896	2.72695	0.456285	0.0122271	0.0286067	0.0173861	0.0996004	0	0.404737	0.314685	0.210425	2.39917
1004	2016-05-21	17.5917	41.5833	100.298	3.47935	0.685108	0.0304983	0.0446807	0.0155425	0.0832821	0	1.12016	0.362926	0.442591	2.03636
1005	2016-05-24	21.8583	34.2083	100.115	6.26689	0.865458	0.0520668	0.102313	0.0482467	0.233741	0.00142101	1.86484	0.85821	0.814383	2.02393
1006	2016-05-27	23.1208	68.4583	100.098	7.76619	1.55677	0.0521486	0.0614025	0.0228614	0.113784	0	3.18381	3.65186	2.00093	2.51299	2.57251
1007	2016-05-30	23.4292	51.5833	99.9613	4.52934	0.516366	0.0208815	0.0301534	0.0262251	0.129426	0	0.863791	0.261234	0.308713	1.92688
1008	2016-06-02	21.2708	55.8333	100.028	4.47315	0.717808	0.0287843	0.027789	0.0170886	0.0911767	0	1.3258	0.88747	0.64162	2.10618
1009	2016-06-08	11.9958	60.2083	99.49	1.72267	0.367371	0.0198736	0.0143262	0.0113087	0.0446275	0	0.164202	0.0477773	0.0654837	2.21404	3.0582
1010	2016-06-11	22.9375	55.8333	99.4967	5.36871	0.638317	0.0340344	0.0456441	0.0219568	0.102945	0	0.758416	0.809269	0.404369	2.09206
1011	2016-06-14	16.075	45.9583	100.335	2.45174	0.473551	0.02978	0.0169538	0.0115396	0.0420093	0.00264285	0.203697	0.157821	0.103883	1.99596
1012	2016-06-17	23.6042	37.1667	100.182	3.59215	0.487631	0.0503964	0.0256793	0.0240741	0.146708	0.00818831	0.237961	0.146413	0.0955715	1.6917
1013	2016-06-20	25.2833	54.7083	100.028	4.69955	1.04161	0.0332611	0.0378162	0.0304154	0.169992	0.00209479	2.56863	0.482307	0.976509	1.88877
1014	2016-06-23	19.4167	41.6667	99.9458	3.64543	0.301438	0.0495444	0.0204411	0.0144552	0.0699836	0.0266715	0.332421	0.158072	0.13615	1.94512
1015	2016-06-26	24.9333	57.625	100.307	4.85977	1.13461	0	0.0590671	0.0289867	0.119681	0	3.28474	0.393722	1.20853	1.94921
1016	2016-06-29	20.6292	50.1667	100.16	2.21175	0.31532	0.0211966	0.0132128	0.0136981	0.050443	0	0.280862	0.122806	0.110137	1.7408
1017	2016-07-02	20.2083	49.6667	100.36	2.78927	0.291589	0.0196908	0.0532672	0.0108536	0.0286976	0.00363072	0.205623	0.112714	0.080659	1.85826
1018	2016-07-05	25.4208	45.1667	99.6087	4.72712	0.992485	0.0392373	0.132052	0.0327276	0.134039	0.0569105	2.04053	0.427191	0.763862	1.79117
1019	2016-07-08	23.4667	75.4167	99.4638	3.76141	0.495396	0	0.0411527	0.0278178	0.140069	0	4.05014	0.639202	1.46316	2.14252	2.19705
1020	2016-07-11	22.025	59.4583	100.514	2.92338	0.302691	0.0127037	0.0148885	0.0134971	0.0623137	0	0.381066	0.159435	0.144933	1.88863
1021	2016-07-14	23.2	79.25	99.4267	4.62764	0.482058	0.0469233	0.0292672	0.0155778	0.0712463	0.0207455	1.84434	0.423438	0.671256	2.32566	2.40019
1022	2016-07-17	21.35	56.2083	100.523	4.78527	0.688165	0.0105912	0.0236926	0.0110529	0.0383809	0	0.774725	0.366786	0.33968	2.11864
1023	2016-07-20	21.3875	53.0417	100.95	3.11498	0.926514	0.018031	0.017757	0.0216975	0.103976	0	1.02683	0.222105	0.38745	1.88705
1024	2016-07-23	27.6083	42.8333	99.9546	2.39335	0.353609	0.00705489	0.00930025	0.0176602	0.0904188	0	0.465338	0.0738019	0.156846	1.35795
1025	2016-07-26	24.3667	56.7917	100.102	3.25639	0.509979	0.0297923	0.0189426	0.015017	0.0745569	0.0064591	0.500343	0.119702	0.174107	1.78723
1026	2016-07-29	23.1083	60	100.105	3.47937	0.676049	0.0212077	0.0141996	0.0137872	0.0584815	0	0.317684	0.132411	0.119958	1.91902	2.45587
1027	2016-08-01	23.6	63.2917	100.454	3.38959	0.374418	0.0130498	0.0196369	0.0100248	0.0296371	0	0.313164	0.0974408	0.105515	1.91695	2.14637
1028	2016-08-04	26.1125	61.9167	100.295	4.94484	0.911706	0.0331851	0.0237754	0.0272291	0.138327	0.000191492	2.02709	0.666078	0.806377	1.9532	2.05722
1029	2016-08-07	23.2042	50.8333	100.091	1.24623	0.551833	0.0818781	0.0217382	0.00655454	0.0169307	0.0872673	0.439112	0.0427153	0.128401	1.35441
1030	2016-08-10	27.75	60.7917	100.357	6.34183	1.14004	0.0346599	0.0369953	0.0258934	0.133578	0.0050896	3.16085	0.679444	1.18645	1.96497	2.0303
1031	2016-08-19	24.4542	67.5833	100.032	6.41582	2.15966	0.0568729	0.0362391	0.0159365	0.0785062	0.016119	2.10179	1.24673	1.01479	2.27226	2.3488
1032	2016-08-22	19.1167	53.625	100.597	2.47385	0.359074	0.02846	0.0124357	0.0107984	0.0404018	0.0216012	0.158328	0.128238	0.0621659	1.90318
1033	2016-08-25	24.4375	79.2083	99.9696	4.89353	0.942117	0.0469541	0.031578	0.0118783	0.0486396	0.0236468	1.50231	0.599371	0.669914	2.3088	2.38255
1034	2016-08-28	25.4042	64.4167	100.667	3.25678	0.481994	0.0501812	0.0329257	0.0102485	0.0584695	0.042448	1.20536	0.147481	0.357752	1.81412	1.91621
1035	2016-08-31	23.7042	63.1667	99.9933	3.66793	0.59893	0.0429901	0.0288105	0.0072309	0.0569577	0.0195132	0.715838	0.51406	0.36363	1.96325	2.12828
1036	2016-09-03	18.8333	59.5	101.052	2.23798	0.610937	0.0886565	0.0228722	0.0062125	0.0283446	0.0859045	0.185513	0.149463	0.082102	1.94481
1037	2016-09-12	18.7292	60.7917	100.853	0.84594	0.119287	0.0637467	0.0247124	0.00587047	0.0229633	0.0724724	1.25241	0.036	0.4	1.5024	1.60096
1038	2016-09-15	15.7333	66.4167	101.249	2.83347	0.251534	0.0309765	0.0146168	0.00431986	0.0733512	0.031068	0.226091	0.115011	0.0854549	2.29726	3.20209
1039	2016-09-18	21	78.125	100.042	3.99889	0.39478	0.0539047	0.0352512	0.00321303	0.036013	0.0294023	2.51013	1.61003	1.24185	2.41254	2.45218
1040	2016-09-21	20.6292	48.1667	100.862	5.39966	0.839528	0.0882281	0.0397445	0.0296723	0.184418	0.0973124	0.750246	0.331223	0.275258	2.1274
1041	2016-09-24	13.9792	56.0417	101.034	1.93663	0.0873807	0.0564807	0.0195659	0.00230585	0.0327695	0.0622166	0.199181	0.137441	0.102612	2.09733
1042	2016-09-27	16.7167	54.1667	99.5533	3.81527	0.584077	0.0726398	0.0278102	0.0176074	0.161413	0.0610855	0.509025	0.20685	0.228698	2.24959
1043	2016-09-30	16.7958	68.5	101.21	2.85518	0.219313	0.0584439	0.0278565	0.00315416	0.0829976	0.060407	0.206359	0.118999	0.0925482	2.27075	3.76849
1044	2016-10-03	16.175	83.7917	100.458	3.3934	0.102088	0.0720914	0.0200396	0.00927055	0.115224	0.056077	0.208463	0.508995	0.188353	2.7393	3.61496
1045	2016-10-09	10.05	63.7083	101.163	1.94533	0.0154295	0	0.00870564	0.00330993	0.0401804	0	0.163143	0.0994865	0.0824961	2.40523	2.82116
1046	2016-10-12	16.9864	69.8182	100.49	3.42171	0.716115	0	0.0313583	0.00912006	0.0708394	0	0.909281	0.694246	0.464426	2.42907	2.53214
1047	2016-10-15	14.8458	72	100.774	2.76847	0.169061	0.0172301	0.0331828	0.00528046	0.0487303	0.0196805	0.80978	0.537368	0.421268	2.46021	2.56121
1048	2016-10-18	20.5333	72.125	99.0388	3.28331	0.10701	0.085199	0.0378226	0.0205138	0.0911153	0.00117971	1.49908	0.249542	0.466448	2.16877	2.31656
1049	2016-10-21	9.29167	81.0417	99.8637	1.35327	0.0253908	0	0.00874453	0	0.00313221	0	0.164102	0.0497949	0.0637792	2.55998	2.59366
1050	2016-10-24	8.24167	59.5	100.454	1.55979	0.181125	0	0.00970103	0.00157267	0.0248354	0	0.30468	0.0908742	0.121286	2.38018
1051	2016-10-27	3.70417	87.625	100.55	1.89136	0.0200923	0	0.0070743	0	0.00737036	0	0.251772	0.311363	0.169492	3.3266	3.35084
1052	2016-10-30	8.58333	73.9583	100.341	1.24174	0.00580798	0	0.011644	0	0.0120198	0	0.437501	0.0976228	0.169955	2.43338	2.46583
1053	2016-11-02	15.2667	81.8333	100.618	5.99771	0.0617119	0.0405599	0.0608342	0.0116014	0.0866973	0	1.97682	2.3275	1.19998	3.02615	3.08212
1054	2016-11-05	11.3708	72.625	100.863	5.24583	0.0989756	0.0333001	0.0465012	0.0071719	0.0580987	0.00630187	0.77849	1.67092	0.705074	3.09378	3.16957
1055	2016-11-08	11.0917	81.7917	100.427	6.46675	0.292847	0.0217818	0.0712271	0.0105239	0.0881222	0.0354632	1.17405	4.60886	1.56851	3.35809	3.40383
1056	2016-11-20	0.3	77.9167	99.3863	0.931422	0.154842	0	0.00115155	0	0.00470087	0	0.102497	0.0482335	0.0526484	3.02679	3.05643
1057	2016-11-23	-0.395833	76.0417	101.24	2.68271	0.273259	0.0378006	0.0164005	0.00213154	0.0323441	0.0245184	0.42301	0.837938	0.309305	3.54362	3.61794
1058	2016-11-26	4.83333	80.7083	100.695	3.48197	0.0619047	0.00694131	0.014652	0	0.0179653	0	0.389993	0.861004	0.356485	3.41862	3.4518
1059	2016-11-29	9.51667	78.7083	99.2017	3.95561	0.0571567	0.0364416	0.0588063	0.0105122	0.0857571	0.0104101	1.45345	1.61021	0.883544	3.1114	3.18381
1060	2016-12-02	4.69583	70	99.7492	1.74323	0.188683	0	0.00564081	0.00023604	0.0183828	0	0.0707879	0.117499	0.0539514	2.95198	3.11145
1061	2016-12-05	3.60417	79.0833	99.9646	2.58929	0.0654399	0.00091409	0.0193407	0.00336941	0.0425225	0	0.848855	1.23762	0.599859	3.3026	3.34162
1062	2016-12-08	-0.0625	67.9583	99.9837	2.12827	0.394487	0.0277117	0.0258405	0.00361488	0.0370606	0.00729064	0.702066	1.99569	0.718846	3.32324	3.38037
1063	2016-12-11	-2.41667	83	100.954	1.31166	0.464691	0.0285024	0.0321831	0.00234058	0.0307303	0.0513485	1.46758	2.89786	1.26054	3.39797	3.44355
1064	2016-12-14	-6.4625	61.4583	99.9846	1.15467	0.609192	0.193707	0.0295309	0.00174094	0.0227334	0.102662	0.90618	2.15566	0.741708	3.25623	3.47077
1065	2016-12-17	-1.79167	90.9583	99.3717	1.27951	0.386727	0.0311131	0.0399051	0	0.0117058	0.0120035	1.4299	2.59204	1.14814	3.53894	3.57659
1066	2016-12-20	-3.04167	66.2083	100.951	1.26358	0.655964	0.0724621	0.0560366	0.00034937	0.025019	0	1.39626	3.67746	1.3611	3.14862	3.23209
1067	2016-12-23	1.75417	73.0833	101.038	1.88548		0.0749434	0.0443845	0.00434014	0.0466798	0.012128	0.954076	7.05837	2.07149	3.2286	3.28789

## Sheet: Simcoe
item	Date/Time	Temp (°C)	Rel Hum (%)	Stn Press (kPa)	NH3(g)	HNO3(g)	Na(p)	K(p)	Mg(p)	Ca(p)	Cl(p)	SO4(p)	NO3(p)	NH4(p)	pH_EAIM II	pH_EAIM IV	*All chemical compositions have the unit ug/m3
1	2007-01-03	3.57083	78.2917	99.275	0.173621	0.0626752	0.00588532	0.0486285	0.00452056	0.0286514	0.0275438	2.3787	2.15292	1.37664	2.16865	2.2453
2	2007-03-13	8.075	67.625	98.5525	1.45937	0.890197	0.0447043	0.0772961	0.00529113	0.0350995	0	6.24029	5.51342	3.84788	2.56228	2.60546
3	2007-03-16	-4.10417	73.2083	99.3704	0.629542	0.265696	0.185039	0.0354545	0.0288604	0.0449854	0	1.86297	1.1458	0.883741	2.8712	3.12492
4	2007-03-19	-0.2625	86.375	98.8375	0.345249	0.32118	0.0487847	0.0287894	0.00321227	0.0171832	0	2.1075	1.41001	1.20524	2.70613	2.80845
5	2007-03-22	9.59583	79.0417	98.6417	0.423579	0.569858	0.0341174	0.0388775	0.00463997	0.0238244	0	3.0091	0.970165	1.44137	2.14833	2.20981
6	2007-03-25	3.20833	88.7917	99.9508	0.535768	0.376033	0.0217141	0.0399261	0.000548377	0.0122824	0.012678	2.63164	3.69594	2.08102	2.82438	2.86939
7	2007-03-28	6.37917	52.7917	100.146	0.528093	0.266547	0.0249934	0.0125786	0.0147437	0.194766	0	0.923098	0.231489	0.415007	1.9735
8	2007-04-03	6.32917	75.9583	98.6229	0.867936	0.100819	0.0351284	0.0128782	0.00267245	0.0325547	0	1.32409	1.21181	0.887207	2.62702	2.68399
9	2007-04-06	-5.01667	74.1667	98.1258	0.61765	0.0449571	0.0745915	0.00805994	0.0107719	0.0287535	0	0.495064	0.192802	0.21981	3.02895	3.21318
10	2007-04-09	-0.258333	70.1667	98.91	1.11676	0.306155	0.0674169	0.0244312	0.00641502	0.0333974	0	1.0356	0.792875	0.612542	2.99879	3.09854
11	2007-04-12	4.7875	88.0417	97.3729	0.450176	0.75968	0.0225402	0.0190526	0.000764927	0.0201171	0	2.36458	1.58361	1.38048	2.53617	2.58946
12	2007-04-15	3.47083	74.5417	97.9175	0.456477	0.293728	0.0112409	0.0368644	0.00635586	0.0203994	0	2.30094	0.590745	0.978752	2.31964	2.38267
13	2007-04-18	5.55	80.2083	98.5154	0.982016	0.671794	0.0689124	0.0503595	0.0115573	0.0331751	0	1.4735	1.25268	0.866522	2.7068	2.80258
14	2007-04-21	12.0458	46.8333	99.5042	2.93705	0.207482	0.0356898	0.0506633	0.0184738	0.0980407	0	1.20621	0.754983	0.633065	2.37069
15	2007-04-24	9.72917	64.25	99.1158	2.48913	0.0464068	0.023385	0.025296	0.0111969	0.0845149	0	1.84692	0.814711	0.889055	2.61586	2.69366
16	2007-04-27	11.2042	89.8333	97.8271	0.622604	0.0805196	0.0269701	0.0273199	0.00461102	0.00910524	0	2.95036	2.17142	1.781	2.53237	2.56611
17	2007-04-30	12.7708	55	98.5504	4.32383	0.166698	0.0214996	0.0150321	0.0101933	0.0684042	0	0.549495	0.599492	0.361007	2.60042
18	2007-05-12	12.3708	46.2083	99.2113	1.49289	0.609947	0.0201643	0.021215	0.0123389	0.0667783	0	0.459932	0.550958	0.292738	2.04421
19	2007-05-15	20.4	52.25	98.1	2.90462	0.803511	0.0113204	0.0521201	0.0242938	0.22816	0	5.29976	0.736505	1.92863	1.88957
20	2007-05-18	9.19583	67.625	99.5679	1.89661	0.237057	0.00923882	0.0411601	0.0124683	0.0986483	0	1.35273	3.35185	1.38779	2.73544	2.80612
21	2007-05-24	22.9708	53.625	99.7392	2.0598	0.848695	0.0422103	0.0558597	0.0441556	0.626193	0	14.1338	1.50707	5.10681	1.60719
22	2007-05-27	18.0125	78.6667	98.9146	1.99202	0.459865	0.0396107	0.0436331	0.0131153	0.0494607	0	3.54733	1.96585	1.78445	2.30421	2.34856
23	2007-06-05	12.45	73.25	97.4242	1.90656	0.441392	0.00799656	0.0350623	0.00092718	0.0452197	0	1.43412	0.758999	0.758833	2.49364	2.54197
24	2007-06-08	23.625	62.9167	98.1342	2.43907	0.63351	0.0588242	0.105405	0.0231117	0.267007	0	3.86823	0.333966	1.25483	1.74088	1.88196
25	2007-06-17	23.6958	52.0833	98.6742	3.47742	0.381718	0.00894622	0.058608	0.00605356	0.0474288	0	3.84568	0.559476	1.34353	1.79401
26	2007-06-20	16.8875	62	98.9617	3.51037	0.132075	0	0.0279753	0.00266944	0.0580118	0	0.394009	0.157834	0.197575	2.27304	2.47163
27	2007-06-23	15.6708	55.125	98.8971	1.83257	0.224988	0.0076224	0.0365705	0.00486314	0.0636759	0	0.651024	0.10652	0.276494	1.97466
28	2007-06-29	18.0292	57.8333	99.0767	1.04879	0.0682802	0.0118635	0.0442308	0.00817515	0.116576	0	1.29357	0.124578	0.49122	1.63253
29	2007-07-02	15.4375	57.6667	99.7267	0.749089	0.080201	0.00327761	0.0838339	0.0124234	0.0435066	0	1.69989	0.210923	0.518147	1.55321
30	2007-07-05	20.6708	75.2917	98.3908	2.82269	0.242926	0.00226094	0.127599	0.0129054	0.037937	0	4.58394	1.84748	2.01886	2.21239	2.24622
31	2007-07-08	24.7375	67.375	98.0704	1.4631	0.669372	0.00620093	0.0888649	0.0125507	0.0425391	0	5.41909	0.482859	1.77487	1.49641	1.53222
32	2007-07-11	21.225	62.9167	98.0387	1.11777	0.390994	0	0.0084957	0.00747381	0.0386315	0	1.512	0.25299	0.537183	1.54529	1.58333
33	2007-07-14	16.5625	78.375	98.1554	1.19053	0.311834	0.00321169	0.0266642	0.00564751	0.0234686	0	1.81244	0.369058	0.745806	2.07766	2.10909
34	2007-07-17	17.9	84.5417	98.8012	1.34231	0.419268	0.00411167	0.0210516	0.00382711	0.0152205	0	1.7377	0.762566	0.915231	2.25421	2.27716
35	2007-07-20	17.8	62.375	98.6996	1.87133	0.0299401	0.00432233	0.0140267	0.00523354	0.0303375	0.00510972	0.260638	0.135986	0.115372	1.94642	2.14045
36	2007-07-23	19.0625	63.7917	99.2842	1.76532	0.326499	0.01205	0.021386	0.0117663	0.0480495	0.00669856	0.73805	0.267254	0.317969	1.88389	1.99854
37	2007-07-26	19.9958	73.1667	98.9058	0.639649	0.309959	0.0118584	0.0297344	0.00563302	0.0324334	0.00846354	10.0147	1.75011	3.66653	1.5156	1.538
38	2007-07-29	23.0667	61.4583	98.7058	1.44172	0.225404	0.0103172	0.0325064	0.00500845	0.0281054	0.0132372	2.32355	0.444257	0.848248	1.55138	1.58001
39	2007-08-01	24.9208	62.9167	98.805	1.43788	0.36846	0.0121566	0.0295047	0.0147735	0.0908349	0.000667913	4.72849	0.341517	1.48533	1.41231	1.46212
40	2007-08-04	21.1208	58.7083	98.9854	1.42252	0.409557	0.00809142	0.0997476	0.00796263	0.037702	0.00375786	1.94002	0.252603	0.681221	1.60326
41	2007-08-07	22.05	92	98.1858	3.25301	0.276734	0.00956028	0.0314677	0.00776449	0.0510008	0	0.880459	0.211985	0.359598	2.60516	2.70511
42	2007-08-10	21.775	67.2917	98.4654	2.66293	0.224406	0.0001169	0.01899	0.0072962	0.0450649	0	0.404246	0.179104	0.171875	1.95972
43	2007-08-13	20.1625	61.375	98.9033	1.71936	0.41191	0.0165851	0.0301002	0.00393607	0.0569203	0	0.8878	0.368236	0.38633	1.79007	1.89023
44	2007-08-16	21.8333	70.0417	98.4071	1.01459	0.426055	0.052117	0.105025	0.00435437	0.0695607	0.0280224	6.01187	1.15003	2.11044	1.54014	1.61031
45	2007-08-25	20.5083	88.0833	98.2225	1.00069	0.265947	0.013147	0.0411656	0.00281639	0.0304533	0	2.44143	0.817241	0.998435	2.03173	2.07304
46	2007-08-28	19.8333	74.4583	99.1583	1.17323	0.666697	0.019253	0.0750757	0.00759939	0.0485114	0	6.00931	1.3221	2.24063	1.79936	1.84183
47	2007-08-31	18.1958	59.125	99.2267	1.13731	0.113023	0.00276943	0.0187594	0.00797596	0.0518498	0	0.526259	0.0628936	0.200363	1.66929
48	2007-09-03	19.1292	69.75	98.9892	1.42035	0.259035	0.00308064	0.0526293	0.00589026	0.0375663	0	2.6733	0.283366	0.878544	1.81906	1.85588
49	2007-09-06	22.7417	67.9167	99.0596	0.714229	0.790267	0.025989	0.132977	0.0152388	0.105141	0.0162513	15.1951	1.18748	4.37477	0.838631	0.925756
50	2007-09-09	16.9875	90.375	98.8533	0.682268	0.0667347	0.00698469	0.0258508	0.000207216	0.00464152	0	1.2913	0.531944	0.658585	2.19243	2.21682
51	2007-09-12	12.9667	77.7917	98.8392	1.07584	0.0858275	0	0.0521567	0.00600474	0.0234753	0.0294116	0.319995	0.180154	0.151627	2.20725	2.40474
52	2007-09-15	9.71667	69.9167	99.2662	1.04853	0.147222	0	0.0193132	0.00460924	0.00788368	0.0322165	0.0884647	0.132024	0.023289	2.24245	2.58704
53	2007-09-27	14.4417	88.4167	98.6021	0.838853	0.102522	0.0059915	0.0999424	0.00556254	0.0136805	0.040404	1.1219	1.00639	0.733685	2.40748	2.48136
54	2007-09-30	14.4292	76.5	99.9188	0.592101	0.0632002	0.00873029	0.126645	0.00747866	0.037184	0.0304683	3.3777	0.482551	1.24383	1.81355	1.90208
55	2007-10-09	18.3583	72.875	98.1633	0.467563	0.245898	0.0712426	0.151951	0.0113456	0.0368657	0.00160213	4.63245	0.881054	1.90243	1.60423	1.7163
56	2007-10-12	6.3875	78.5833	98.4008	0.686365	0	0.0036028	0.06531	0.00394774	0.0326818	0.00183836	0.448309	0.150283	0.199396	2.40431	2.58342
57	2007-10-18	16.0591	88.6364	97.9473	0.763313	0	0.0290898	0.148794	0.00468443	0.0395263	0.000943641	4.88574	1.18349	2.05434	2.19116	2.26731
58	2007-10-21	18.4958	53.4167	98.7217	0.578899	0.417474	0.011954	0.101248	0.00540853	0.0539313	0	1.25598	0.214159	0.5438	1.35846
59	2007-10-24	8.72917	79.9583	98.7192	1.03281	0.0884874	0.00608114	0.102409	0.00537394	0.0522877	0.00620791	0.845802	1.64087	0.791399	2.67316	2.7661
60	2007-10-27	11.5042	84.9583	98.8008	0.372277	0.102998	0.00329182	0.0987115	0.00191113	0.0162926	0.00234271	1.43953	0.576977	0.713893	2.11152	2.19411
61	2007-10-30	8.575	70.75	99.76	0.693266	0.179823	0.00907197	0.141515	0.00574243	0.0369433	0	2.50261	0.894018	1.15366	2.22627	2.31549
62	2007-11-08	0.108333	89.6667	99.0463	1.28467	0.0173139	0.0166819	0.0829627	0.00353463	0.0179258	0.0331144	1.42598	2.58837	1.30235	3.46738	3.51307
63	2007-11-20	9.59583	81.9167	98.6021	0.815673	0.0065279	0.0133154	0.069551	0.00516362	0.0422912	0.0442699	3.89778	4.97825	2.85794	2.55818	2.60196
64	2007-11-26	1.65217	93.913	98.4252	0.414637	0	0.0143228	0.058372	0.00136711	0.0114394	0	2.66742	4.34831	2.18984	2.98539
65	2007-12-02	-0.1875	94.875	98.4146	0.13206	0.249695	0.00840245	0.0293919	0.000274527	0.00551447	0	0.963497	1.13948	0.712269	2.62625	2.71185
66	2007-12-08	-2.5375	73.4167	99.6858	0.948641	0.0248522	0.0208442	0.0384481	0.00219255	0.030079	0	2.48195	2.61818	1.59878	3.10786	3.15579
67	2008-01-01	-0.816667	88.0417	97.8467	0.326688	0.0416962	0.0282678	0.041839	0.00211869	0.0108246	0	2.48926	2.1958	1.50845	2.77044	2.85165
68	2008-01-07	12.6542	83.75	98.6654	0.43531	0.0546361	0.115858	0.0396935	0.00984317	0.0449043	0	3.08453	0.654359	1.15216	1.91152	2.07827
69	2008-02-18	0.7	80.2083	97.0671	0.362257	0.0155649	0.0338741	0.0276354	0.00203468	0.00879751	0.0133942	2.74236	1.79821	1.48145	2.56768	2.63044
70	2008-02-21	-9.54583	65.2083	99.7763	0.218709	0.0923538	0.0863937	0.0377069	0.00492466	0.00713687	0.0229047	0.758814	0.927094	0.502362	2.72903	3.02207
71	2008-02-24	-4.4	79.2083	99.0037	0.294507	0.525227	0.0635809	0.0691287	0.00622736	0.0200094	0	5.61731	5.64914	3.73006	2.62359	2.81339
72	2008-02-27	-11.025	69.5417	98.0546	0.461515	0.0958252	0.0897953	0.0148348	0.0225545	0.0149945	0	0.766248	0.483816	0.361677	3.20756
73	2008-03-04	-2.4125	78.1667	98.4338	0.394292	0.185708	0.0316787	0.0162771	0.0119383	0.0203413	0	1.61217	0.562223	0.73495	2.68321	2.78036
74	2008-03-07	-3.3	84.1667	99.1579	0.164172	0.161391	0.0496642	0.0436372	0.00898903	0.0215743	0.0514672	2.96448	6.52906	2.98732	2.61698	2.79917
75	2008-03-16	-1.39167	69.4583	99.4562	0.392048	0.710104	0.0620922	0.10383	0.00805584	0.0306117	0.118372	3.33591	9.14361	3.81726	2.47911	2.64679
76	2008-03-19	2.55417	90.0417	97.5308	0.509111	0.0596422	0.0157782	0.00935339	0.00601702	0.0173559	0	1.12969	0.420319	0.529041	2.81963	2.87724
77	2008-03-22	-3.05417	47.7917	99.0925	0.66936	0.318322	0.0269741	0.0168927	0.0087261	0.0237202	0.00157861	0.71028	0.485973	0.394535	2.49684
78	2008-03-25	-0.770833	80.625	98.7221	0.288355	0.139312	0.0364168	0.036806	0.00531023	0.0168659	0.0131156	2.74244	1.39335	1.39631	2.53063	2.63249
79	2008-06-26	21.425	81.9583	98.2808	2.29735	0.512223	0.0760858	0.0608775	0.0073826	0.160735	0.0218296	6.07971	2.00927	2.6839	2.21725	2.28404
80	2008-06-29	19.5208	76	97.7896	2.42643	0.382313	0.0342466	0.0527074	0.00674212	0.0417681	0.0162375	2.31693	0.512903	0.948612	2.18561	2.23385
81	2008-07-05	19.3042	60.8333	98.92	2.37851	0.563905	0.171331	0.0655353	0.00891654	0.0529737	0.18951	1.79356	0.68628	0.741305	1.97646	2.13368
82	2008-07-08	24.2667	74.875	98.265	1.24608	0.569516	0.0106045	0.0701721	0.0130485	0.0599553	0	7.1542	0.642482	2.21828	1.48267	1.52612
83	2008-07-11	21.8833	73.0417	98.8438	1.9452	0.593956	0.0173648	0.0687563	0.00916465	0.0929104	0.000397504	5.16751	0.86616	1.8856	1.89072	1.93762
84	2008-07-14	19.4875	61.6667	98.3021	2.88024	0.578937	0	0.0519499	0.00976664	0.0718123	0.00684516	6.64744	0.734388	2.1662	1.99091	2.01853
85	2008-07-20	22.2333	83.5833	98.3512	1.59886	0.285289	0	0.0317113	0.00231583	0.0272845	0	5.93409	1.0742	2.15293	1.97228	1.98631
86	2008-07-23	18.1542	84.2083	98.5012	1.22481	0.284172	0.00963791	0.0174238	0.00121417	0.0202382	0	1.30925	0.933543	0.646728	2.68783	2.20184
87	2008-07-29	21.2625	69.7917	98.5617	1.77957	0.464489	0.0191716	0.0240395	0.0020927	0.0384007	0	0.945156	0.229269	0.368389	1.84725	1.91336
88	2008-08-04	19.8917	79.0833	98.7571	1.20082	0.036706	0	0.00523862	0.000102704	0.00402653	0.0225083	0.822462	0.106342	0.321717	1.89538	1.90072
89	2008-08-07	19.0208	76.0833	98.2071	1.92464	0.0828659	0	0	0	0.00212585	0.0172447	0.699507	0.119919	0.269074	2.08907	2.09021
90	2008-08-10	13.3875	87.875	98.1433	0.901186	0.0386175	0	0.000402678	0	0	0.0203926	0.647404	0.142807	0.307511	2.35467	2.35481
91	2008-08-16	18.8583	72	98.9329	2.2802	0.124974	0	0	0	0.0101093	0.0275069	1.0382	0.24306	0.454533	2.1194	2.12616
92	2008-08-22	22.4042	73.0833	99.4733	1.09378	0.331589	0	0.00476762	0.00413939	0.0264192	0.0228494	9.80595	1.26185	3.77498	1.67992	1.68552
93	2008-08-25	16.1167	69.7083	98.9587	1.51901	0.066658	0	0.00681417	0.00183282	0.00990001	0.0244628	0.879543	0.224894	0.38386	2.05464	2.06955
94	2008-08-28	17.3333	88.0417	98.5767	1.66225	1.0671	0	0.00243874	0.000238714	0	0.0203303	1.6815	1.05458	0.904308	2.47207	2.47449
95	2008-08-31	18.7917	69.7083	99.4871	2.97608	0	0	0.0360684	0.0035153	0.0269658	0.0249027	2.54645	0.471531	0.893647	2.18618	2.20516
96	2008-09-12	19.7125	89.75	98.6713	1.20809	0.663774	0	0.011938	0.00295356	0.0378798	0	9.18316	1.36171	3.49154	2.11983	2.13593
97	2008-09-15	14.3208	81	98.5713	1.12884	0.446618	0	0	0	0	0	0.288934	0.0804194	0.123189	2.22431	2.22402
98	2008-09-21	15.8625	83.5	99.7013	1.25504	0.453863	0	0.0265889	0.00116759	0.0347213	0.000538689	6.24095	2.24637	2.98203	2.32588	2.34332
99	2008-09-24	15.6167	70.1667	100.053	0.888822	0.533125	0	0.0300181	0.00399018	0.0733451	0	3.43154	1.81785	1.63606	1.97319	2.02094
100	2008-09-27	17.0083	86.3333	98.8854	1.27877	0.228669	0	0.021933	0	0.0262447	0.00527795	2.51605	0.987466	1.14956	2.30073	2.32075
101	2008-10-03	7.38333	74.4583	98.5983	1.38842	0.145759	0.0546588	0.0703747	0	0.0185859	0.0893771	0.312472	0.116483	0.132649	2.60614	2.96764
102	2008-10-09	14.1708	74.8333	98.6063	0.746308	0.366242	0.0252026	0	0.00139926	0.0101594	0	2.61658	1.49187	1.31902	2.06514	2.08646
103	2008-10-12	14.1083	75.5417	100.178	0.98146	0.217272	0.0462602	0.0333181	0.00393398	0.0212432	0.00208143	3.89756	1.48498	1.70398	2.12083	2.16187
104	2008-10-15	11.1375	82.5417	98.9917	1.62371	0.330949	0.0255194	0.0444372	0.012292	0.119234	0	1.73152	1.33363	0.87668	2.65305	2.75342
105	2008-10-27	4.7625	80.375	98.4854	0.581076	0.149391	0.0183512	0.0245485	0	0.00928541	0	0.608615	0.361183	0.29308	2.52089	2.58144
106	2008-11-02	3.04583	72.25	100.048	1.04415	0.297492	0.0539566	0.0310098	0.000644915	0.0119705	0	0.536139	0.941725	0.42406	2.8484	2.93327
107	2008-11-05	11.0583	76.7083	99.2025	0.396027	0.290308	0.0788817	0.0835782	0.00551949	0.0311901	0.00975577	6.42467	2.59553	2.95105	2.01072	2.09489
108	2008-11-08	5.87083	77.5	97.4838	0.559009	0	0.0596894	0.0313024	0.000874488	0.043996	0.0211124	1.42871	0.922116	0.78652	2.45188	2.55609
109	2008-11-14	10.9167	87.0833	97.8446	0.311549	0.207049	0.0227265	0.0291994	0	0.0167335	0	3.60413	1.35266	1.66494	2.12036	2.16415
110	2008-12-08	-6.22917	76.0833	99.3925	0.418644	0.210065	0.0444365	0.0214893	0.00251443	0.0134796	0	1.35048	1.11784	0.817769	2.99176	3.08123
111	2008-12-14	2.8375	77.7083	98.91	0.182228	0.573019	0.0216044	0	0.00230392	0.0224098	0	1.58701	0.644793	0.778012	2.09832	2.17023
112	2008-12-17	-3.41667	87.6667	98.9725	0.246968	0.0653982	0.130209	0.0136618	0.0113148	0.0319406	0.0169434	3.02865	2.98695	1.75397	2.27977	2.72228
113	2008-12-26	-0.75	77.5417	99.625	0.196552	0.00586178	0.0162588	0.0500218	0.00126867	0.0132258	0.0122864	4.81093	3.97659	2.91856	2.4577	2.52923
114	2009-01-28	-6.975	88.375	98.0558	0.060343	0.364487	0.037953	0.0589299	0.00160558	0.0236101	0	2.45782	5.02478	2.19995	1.70594	1.8695
115	2009-01-31	-10.2417	78.4167	98.4158	0.0724684	0.231853	0.0428227	0.0376242	0.00232607	0.00581178	0	1.41563	1.93128	1.05222	2.18149
116	2009-02-06	-8.6875	76.0833	99.5012	0.19119	0.472181	0.0516011	0.0896809	0.00702959	0.0258603	0.0268375	3.32991	4.10409	2.31661	2.10558	2.57183
117	2009-02-09	-2.2	87.4583	99.7479	0.296744	0.209898	0.0237153	0.0702544	0.00642858	0.0300791	0.0285963	3.66054	9.76015	3.95583	2.40027	2.60482
118	2009-02-12	2.88333	85.9167	97.3088	0.325672	0.140776	0	0.0147982	0	0	0.014263	1.99677	0.997383	1.09621	2.5931	2.60524
119	2009-02-18	0.8375	84.4583	97.0125	0.200132	0.528178	0.0160004	0.0413481	0.00205985	0.00444435	0.0269999	2.05684	1.05403	1.11373	2.34739	2.42108
120	2009-02-21	-4.11667	78.625	98.7987	0.2745	0.353405	0.016893	0.0351004	0.00434771	0.00517804	0.0184848	2.64453	1.80345	1.50609	2.62781	2.70663
121	2009-02-27	2.16667	81.7083	98.0308	0.279592	0.278374	0.0689367	0.0481119	0.0112905	0.0224496	0.0677536	2.28886	0.515859	1.02776	2.36305	2.51985
122	2009-03-02	-11.9458	60.0833	99.9025	0.142439	0.0896447	0.0458372	0.014937	0.0130485	0.0174284	0.0212131	0.615828	0.291044	0.302579	2.59968
123	2009-03-11	2.90417	71.4167	98.6896	0.195426	0.116765	0.0696823	0.0440177	0.00628405	0.0231752	0	1.81371	1.04854	0.905722	2.10645	2.26236
124	2009-04-10	5.60417	57.625	98.6375	0.59417	0.547899	0.0205922	0.0282883	0.00271142	0.0191414	0	2.07628	0.586068	0.889198	2.11189
125	2009-04-22	4.6125	77.2083	97.7258	0.704478	0.104648	0	0.00646579	0.00311001	0.0175343	0	0.726808	0.518989	0.39123	2.58509	2.62056
126	2009-04-25	19.5542	59.0417	98.92	2.14062	0.336322	0.0140038	0.0413394	0.0113259	0.0788859	0	1.89996	0.19743	0.662374	1.86592
127	2009-04-28	11.0667	83.625	99.7079	1.96063	0.302533	0	0.00960656	0.0029947	0.00197112	0	1.28162	0.615106	0.648765	2.76666	2.77665
128	2009-05-01	13.8042	77.0417	98.1571	1.00245	0.367142	0.00120587	0.0168044	0.0044935	0.0156097	0	2.31463	1.40403	1.17153	2.21706	2.23719
129	2009-05-04	12.1958	48.7083	99.0054	2.004	0.351997	0.0101534	0.0460928	0.0104797	0.0483208	0	2.68229	0.403394	1.00484	2.13901
130	2009-05-07	13.3708	80.8333	98.0667	1.51514	0.21003	0	0.0346013	0.00888525	0.0370415	0	4.75275	3.37977	2.55676	2.48208	2.50657
131	2009-05-13	14.05	67.7	98.934	2.21464	0.218765	0	0.0268663	0.0160629	0.143886	0	3.88236	0.515207	1.47611	2.29591	2.36054
132	2009-05-16	13.55	76.0909	98.3936	1.84571	0.194245	0	0.0262598	0.00237956	0.00578037	0	1.93675	0.574112	0.923182	2.42695	2.44004
133	2009-07-12	15.9625	61.8333	98.8325	1.84779	0.149957	0.00517333	0.0184761	0.00185747	0.0143974	0	0.576774	0.0539605	0.236986	2.03334	2.07907
134	2009-07-15	18.6625	64.5833	98.8167	1.25206	0.329992	0.00433406	0.0274586	0.0047881	0.046364	0	1.90478	0.143625	0.742675	1.7646	1.80787
135	2009-07-18	16.0208	78.0417	98.3187	2.07819	0.140185	0.01628	0.0105812	0.00128222	0.00823557	0	0.694176	0.107483	0.284557	2.32426	2.35857
136	2009-07-21	17.5	84.4167	99.2483	1.50219	0.86097	0.00484695	0.0249448	0.00276327	0.0266329	0	2.68135	1.36036	1.39837	2.33489	2.35703
137	2009-07-24	19.25	81.6667	98.3146	1.77364	0.413008	0.0171084	0.0319484	0.0074946	0.0536925	0	3.72347	0.905561	1.46396	2.16594	2.20233
138	2009-07-27	19.9875	77.3333	98.3946	2.02014	1.2941	0.0161157	0.0171982	0.00396662	0.0370666	0	1.88982	0.199231	0.694467	2.09455	2.13043
139	2009-07-30	19.2292	74.875	98.3442	1.70989	0.603691	0.00548975	0.0246946	0.00831305	0.0497005	0	2.14153	0.402586	0.812044	2.01592	2.05727
140	2009-08-02	20.3792	69.5417	98.3125	1.368	0.471724	0.00986787	0.0347074	0.00581247	0.0479883	0	3.04317	0.359365	1.04917	1.7469	1.7842
141	2009-08-05	17.6375	61.375	98.8037	1.56654	0.384139	0.0366484	0.00575203	0.00581194	0.0711038	0.0492176	0.24828	0.197263	0.0964613	1.86883	2.88196
142	2009-08-08	17.0208	84.2917	99.2025	1.77131	0.976254	0.0580487	0.0715016	0.00940265	0.0938346	0.0562608	2.02998	0.44629	0.888795	2.37602	2.48434
143	2009-08-17	26.1542	72.2917	99.0792	0.63676	0.421471	0.0349771	0.0466267	0.0143426	0.121607	0.0305104	11.3205	0.391139	3.21748	0.838834	0.924341
144	2009-08-20	23.9833	80.0417	98.0263	1.29471	0.311093	0.0486878	0.0581367	0.0119393	0.0874963	0.0523623	3.69026	12.343	1.24173	1.65223	1.72526
145	2009-08-23	17.8292	86.8333	98.7117	1.89608	0	0	0.00178011	0	0.0077645	0	0.447711	0.109543	0.222673	2.38768	2.40266
146	2009-08-26	18.4292	88.4583	98.9404	1.88144	0.301764	0	0	0.00182481	0.0310692	0	2.01879	0.697822	0.904515	2.44038	2.45918
147	2009-08-29	17.475	82	97.8171	1.01195	0.275222	0	0	0.000767842	0.018647	0	2.64522	0.485611	1.02808	2.01868	2.02914
148	2009-09-01	13.2333	73.4167	99.8046	1.50652	0.533608	0	0	0.00239299	0.0341633	0	0.770497	0.470631	0.370584	2.31661	2.36278
149	2009-09-04	17.1208	72.9583	99.1996	2.00608	0.281283	0	0.0174572	0.00829177	0.0852534	0	2.20465	1.07714	1.05138	2.22191	2.27508
150	2009-09-07	19.4458	79.875	99.2492	2.03167	0.361218	0	0.0778514	0.00558645	0.0400044	0	3.70697	0.667085	1.4327	2.17266	2.20364
151	2009-09-10	18.7167	72.375	99.7367	2.16148	0.20687	0	0.0145686	0.00316332	0.0278039	0	1.87392	0.377615	0.737803	2.10677	2.12666
152	2009-09-13	17.5208	77.2917	98.9283	2.51968	0.122786	0	0.00582049	0.00334491	0.0321604	0	2.11433	0.29175	0.77253	2.30711	2.32517
153	2009-09-22	20.9417	87	99.1517	1.7645	0.15696	0.0125259	0.00130197	0.00636827	0.0310713	0	4.94503	1.532	2.10893	2.23662	2.25353
154	2009-09-25	12.5667	76.5	99.6475	1.57104	0	0.019539	0	0.00377999	0.00723216	0	0.544435	0.325469	0.238974	2.37791	2.42484
155	2009-10-16	2.24167	77.625	98.8092	0.500016	0.0878362	0.021443	0.0169923	0.0046538	0.0317268	0.0453458	0.886423	0.876566	0.584511	2.64701	2.7254
156	2009-10-19	6.525	73.0417	99.1	0.5567	0.115226	0.0208355	0.0224766	0.00484946	0.0425659	0.0460833	1.63539	0.873545	0.895357	2.35476	2.42601
157	2009-10-22	12.0167	75.0833	98.6629	1.01807	0.400914	0.026855	0.028551	0.00870988	0.0646429	0.0496376	3.17418	1.1216	1.43335	2.24707	2.30787
158	2009-10-28	11.1522	83.7391	98.4822	0.802967	0.172093	0.0203977	0.0175161	0.00328967	0.0205571	0.0423364	2.03141	2.52936	1.53352	2.5169	2.54694
159	2009-11-21	7.77917	88.375	99.2896	1.47468	0.100296	0.00116734	0.0488481	0.000385742	0.0241882	0.000923622	3.32521	4.41648	2.53164	3.01529	3.03634
160	2009-11-24	7.68333	93.8333	99.1713	2.42337	0.111226	0.0204328	0.0601973	0	0.00307341	0.0605419	2.32854	3.48745	1.99212	3.46231	3.48145
161	2009-11-27	2.28333	88.9583	97.7729	0.574884	0.0155844	0.00993309	0.0155908	0	0.0128961	0	0.871017	0.684695	0.534404	2.92367	2.96051
162	2009-11-30	2.6	77.375	98.0383	0.592351	0.0206903	0.00382232	0.00948758	0	0.00540141	0	0.663156	0.65751	0.431582	2.68293	2.70463
163	2009-12-03	4.9625	87.5833	97.3133	0.466953	0	0.113477	0	0	0.00817166	0.134523	0.775415	0.691391	0.519592	2.67719	2.8176
164	2009-12-06	-1.225	69.0833	99.4425	0.295404	0.168819	0.00623803	0.0247103	0.000778055	0.0240619	0.0108331	3.00355	4.84662	2.4893	2.52653	2.57458
165	2009-12-09	2.27083	85.5	96.0875	0.352497	0.0803422	0.0167978	0	0.00102772	0.00435668	0	1.00804	0.606451	0.54806	2.60112	2.63317
166	2009-12-12	-3.28333	66.3333	99.8625	0.136462	0.427253	0.0532856	0.0716826	0.00500343	0.0273227	0.00118106	1.32536	2.99568	1.25677	2.11968	2.33452
167	2009-12-15	0.2625	86.3333	98.7871	0.398055	0.130757	0.00467551	0	0	0.0193875	0	1.39485	1.54873	1.01942	2.8648	2.89393
168	2009-12-18	-4.6625	67.6667	99.1296	0.54017	0.0138852	0.0470196	0	0.00276617	0.040115	0.0396636	0.167778	0.318991	0.0934638	2.96007	3.28788
169	2009-12-24	-4.47917	85.7083	99.81	0.547276	0.00681303	0.0232691	0	0	0.0202943	0.0298209	0.601295	1.62434	0.724866	3.32363	3.37178
170	2009-12-27	-1.43333	88.3333	98.1492	0.293812	0	0.00889262	0	0	0.0122654	0	1.11109	0.348127	0.585542	2.86169	2.89281
171	2010-01-05	-6.41667	85.9583	98.375	0.694516	0.0875646	0.00736242	0	0	0.015729	0	0.272794	0.371271	0.196021	3.48361	3.52848
172	2010-01-26	-2.25	83.5417	97.4625	0.186619	0.0126902	0.0791624	0.0352655	0.00107884	0.023829	0	1.78179	1.06437	0.957705	2.56486	2.75203
173	2010-01-29	-13.1417	73.125	99.9558	0.366694	0.206964	0.0575624	0.0282655	0.000978845	0.034929	0	0.442894	0.382171	0.217947	3.29084
174	2010-02-01	-7.35	73.7083	99.5138	0.279187	0.052904	0.0286624	0.0171655	0	0.027029	0	0.570894	0.425571	0.316334	2.86129	2.98893
175	2010-02-04	-6.62083	81.1667	99.94	0.417907	0.49302	0.0332624	0.0487655	7.88e-05	0.043529	0	2.78249	2.66537	1.79634	2.99889	3.12801
176	2010-02-10	-4.35833	86.75	97.4137	0.710637	0.458532	0.0119624	0.0236655	0.00587884	0.068229	0	0.677594	1.29647	0.619353	3.33926	3.44587
177	2010-02-19	-0.9	75.7083	98.6508	0.606999	0.147593	0.0503624	0.0483655	0.00247884	0.039929	0.0539638	0.377794	0.540371	0.275114	2.89037	3.08571
178	2010-02-22	-1.825	89.2083	97.9942	0.307988	0.743683	0	0.0356655	0.00147884	0.022229	0.0613638	1.14509	4.49707	1.70066	2.59529	2.69098
179	2010-02-25	-5.92917	84.7083	97.8958	0.805966	0.166203	0	0.0103655	0.00407885	0.00662896	0	0.997594	1.17127	0.746811	3.49202	3.51335
180	2010-02-28	0.454167	84.3333	97.9758	0.77483	0.0536273	0	0.0103655	0.00207885	0.00902896	0	0.947594	0.358571	0.48476	2.99679	3.01757
181	2010-03-03	-0.358333	65.0417	98.2442	0.719889	0.235822	0	0.0124655	0.00607885	0.047129	0	0.443894	1.00447	0.426269	2.8283	2.92724
182	2010-03-06	-2.30417	73	99.7387	1.99432	0.334701	0	0.0299655	0.00617884	0.071229	0	1.00349	1.50937	0.819198	3.47711	3.53909
183	2010-03-09	3.5875	75.5833	98.6488	0.613608	0.39931	0.0541624	0.0488655	0.0168788	0.244729	0.0164638	5.80069	13.3695	5.41877	2.21177	2.46552
184	2010-03-12	5.65417	88.4167	98.1958	0.542079	0.495878	0.0333624	0.0484655	0.00477885	0.097229	0.0571638	1.92189	4.44827	1.86812	2.57809	2.71423
185	2010-03-24	4.84583	57.5833	98.6892	0.88485	0.107807	0.0196624	0.00716554	0.00387885	0.038729	0.0111638	0.900994	0.631871	0.510537	2.41752
186	2010-04-05	15.1583	58.5417	98.5583	2.68151	0.279303	0.0325624	0.0371655	0.0118788	0.139329	0.0123638	1.94439	1.04627	1.08034	2.28801
187	2010-04-08	9.91667	86.9167	97.3954	0.727924	0.281623	0.0230624	0.0147655	0	0.029729	0.00846376	0.892394	0.719871	0.620782	2.56218	2.62148
188	2010-11-19	2.87917	78.75	99.3008	2.25899	0.391271	0.000462425	0.103866	0.0165788	0.097129	0.0522638	2.58849	3.77197	2.06769	3.28377	3.34219
189	2010-11-22	13.475	82.375	98.5904	0.606841	0.171471	0.0518624	0.0337655	0.00637885	0.027929	0	2.43299	0.385171	0.820676	1.93187	2.02183
190	2010-11-25	6.6	95.875	97.4286	0.654667	0.418984	0.0478624	0.0127655	0.00347884	0	0.0253638	0.593794	0.471671	0.229272	2.90324	2.98941
191	2010-11-28	-0.354167	81.25	99.6271	0.762105	0.0890474	0.0325624	0.0426655	0.00507885	0.010329	0.00646376	2.05039	1.58177	1.16168	2.97539	3.02837
192	2010-12-01	0.370833	90.7917	97.8967	0.527062	0	0.0242624	0.0192655	0.00557884	0.013929	0.00466376	2.32119	1.34777	1.16687	2.96087	3.01702
193	2010-12-07	-4.8125	83	97.965	0.144603	0.0395629	0.0182624	0.000165542	0.00227884	0	0.0182638	0.232894	0.034271	0.0164111	2.18105	2.29196
194	2011-01-09	-9.0625	87.25	99.0779	1.26411	0.14288	0.0295624	0.0274655	0	0.00432896	0.00976376	0.987494	2.20067	1.04767	3.98951	4.02135
195	2011-01-12	-8.56667	83.2083	98.6817	0.555098	0.112879	0.0153624	0.0119655	0	0	0.0270638	0.241594	0.303971	0.130927	3.43413	3.48209
196	2011-01-15	-4.40833	85.9167	98.4204	0.341823	0.256181	0.0330624	0.0540655	0.00217885	0.024329	0.00286376	3.29339	4.05597	2.29541	2.78493	2.92951
197	2011-01-18	0.0291667	95.2917	97.9196	0.205791	0.337733	0.0337624	0.0596655	0.00107884	0.014329	0.0417638	2.58539	2.92137	1.78674	2.65798	2.84154
198	2011-01-21	-10.7208	81.5	98.0687	0	0.138127	0.0481624	0.0370655	0.000978845	0.00892896	0.000163761	1.15619	1.43067	0.850037	2.09725
199	2011-01-24	-16.0458	80.875	99.4329	0.108562	0.0328615	0.119162	0.0219655	0.00517884	0.011429	0.0464638	0.304694	0.564871	0.187179	2.5959
200	2011-02-05	-4.86667	81.7083	97.6721	0.0424104	0.875249	0	0.0485655	0.00797885	0.049229	0.0615638	2.64759	3.83077	2.02329	1.71112	1.82681
201	2011-02-08	-11.3	70.4167	98.8067	0.11134	0.128386	0.0130624	0.0496655	0.00477885	0.025929	0.0336638	1.00159	0.543571	0.547963	2.65541
202	2011-02-11	-12.0708	80.5	98.6238	0.112552	0.690128	0	0.0631655	0.00587884	0.028529	0	1.84699	6.37607	2.35081	1.51232
203	2011-02-14	1.1	72.1667	97.6475	0.34705	0.328096	0	0.0209655	0.00247884	0.023329	0	1.09149	0.772771	0.667734	2.46734	2.52101
204	2011-02-17	7.3125	75.7083	98.425	0.50858	0.585252	0.00606242	0.0873655	0.0103788	0.057429	0.000163761	3.23469	2.20527	1.79504	2.28482	2.36719
205	2011-02-20	-4.89583	79	99.3892	0.193576	0.240968	0.0172624	0.0398655	0.00587884	0.017329	0.0442638	0.537294	0.555371	0.369385	2.63846	2.79399
206	2011-02-23	-8.62917	74.125	99.6621	0.00817956	0.0369883	0	0.00956554	0.00347884	0.022229	0.00316376	0.114894	0.272971	0.0714369	1.85246	2.20988
207	2011-02-26	-5.69583	90.75	98.8592	0.197256	0.42654	0	0.0347655	0.00657884	0.029229	0.000963761	1.46459	1.62457	1.05307	2.8374	2.99024
208	2011-03-01	-3.69583	78.4583	99.4342	0.338336	0.351414	0	0.0322655	0.00767885	0.035329	0	1.99749	1.07697	1.03895	2.67622	2.77459
209	2011-03-04	-0.525	79.375	99.4921	0.73491	0.386458	0.0155624	0.0520655	0.0115788	0.066629	0.0138638	1.10169	1.86797	0.914918	2.97203	3.0812
210	2011-03-10	4.63333	95.7917	98.005	0.528238	0.344483	0.00786242	0.00846554	0	0.00932896	0	0.299994	0.458771	0.291985	3.08365	3.1231
211	2011-03-13	0.8625	85.7083	99.1488	0.293477	0	0.0283624	0.0147655	0.00337885	0.023929	0	2.42149	0.653671	1.08631	2.56616	2.64544
212	2011-03-16	3.8625	93.5833	98.8617	0.337797	0.109323	0.0299624	0.0534655	0.00357885	0.034629	0	3.14639	3.34897	2.02685	2.63094
213	2011-03-19	0.841667	72.7917	100.129	0.552067	0.0455689	0.0335624	0.0130655	0.00307885	0.012129	0	1.63489	0.267971	0.689963	2.55498	2.60677
214	2011-03-25	-7.34167	74.2083	98.9504	0.327249	0.120652	0.0472624	0.0189655	0.00427884	0.024629	0	1.31459	0.851571	0.770392	2.97447	3.08815
215	2011-03-28	-4.65	66.5	99.2867	1.06643	0.142847	0.0724624	0.0258655	0.00667885	0.050329	0.0106638	0.663794	0.489171	0.370314	3.20284	3.36906
216	2011-03-31	1.3	94.4167	98.0192	0.152595	0.274797	0.0387624	0.0426655	0.00357885	0.032629	0.0222638	2.59099	3.21487	1.84768	2.39887	2.629
217	2012-04-06	5.74583	43.25	99.3008	2.63979	0	0.00436242	0.00556554	0.00647884	0.026129	0.00626376	0.524394	0.300371	0.271682	2.63452
218	2012-04-09	7.6375	44.5833	98.1312	2.75187	0	0.00216242	0.0101655	0.00587884	0.045429	0.00946376	0.964594	0.615071	0.521889	2.57976
219	2012-04-12	4.50417	62.5833	99.3563	2.98504	0.12342	0.157262	0.319766	0.00947884	0.111329	0.241664	0.749794	0.727471	0.504024	3.07258	3.6375
220	2012-04-15	15.2208	80.5833	98.3571	1.89673	0.0854171	0.0457624	0.0615655	0.00877885	0.070229	0.0247638	3.10219	1.51317	1.59851	2.47136	2.53079
221	2012-04-18	5.5875	57.2917	99.4754	2.21292	0.280466	0.0359624	0.0314655	0.00727884	0.043629	0.0325638	0.977994	1.31917	0.696895	2.83821
222	2012-04-21	4.85833	87.0417	98.3612	1.14591	0.151294	0.0480624	0.0331655	0.00177885	0.013329	0.0577638	0.416894	0.276071	0.239905	2.99978	3.12426
223	2012-04-24	5.16667	63.1667	96.9717	1.51033	0.0260623	0.0129624	0.0201655	0.00527884	0.036829	0.0165638	1.28279	0.227271	0.538489	2.59299	2.64847
224	2012-04-27	4.5625	43.9167	99.1454	1.61381	0.0166062	0.0393624	0.0233655	0.00947884	0.049929	0.0314638	0.799194	0.274871	0.35593	2.47001
225	2012-04-30	5.67917	70.2083	99.0625	2.0192	0.367102	0.0248624	0.0562655	0.00827884	0.044029	0.0351638	1.39979	1.23567	0.852153	2.91189	2.97509
226	2012-05-03	19.85	73.5833	98.6671	3.59132	0.314965	0	0.0432655	0.00747884	0.039229	0.0444638	3.04449	4.50787	2.57836	2.4944	2.51588
227	2012-05-06	13.7458	39.7083	99.0508	1.39637	0.336265	0.0271624	0.0535655	0.00707885	0.046329	0.0275638	1.25639	0.457171	0.574818	1.84463
228	2012-05-09	12.3542	75.125	97.9271	1.98912	0.027481	0.0166624	0.0369655	0.00477885	0.026629	0.0271638	2.58709	2.37727	1.63529	2.60836	2.63625
229	2012-05-12	16.1042	57.25	99.3517	1.8996	0.414901	0.00956242	0.0396655	0.0164788	0.124929	0.0101638	2.72719	0.657771	1.09598	2.00727
230	2012-05-15	15.8292	49.6667	98.5863	3.25991	0.938824	0.0149624	0.0295655	0.0222788	0.271529	0.0199638	2.46499	1.33107	1.17409	2.24304
231	2012-05-18	13.8458	50.3333	99.2725	2.42601	0.231499	0.0180624	0.0525655	0.0152788	0.161729	0.0170638	1.16929	0.849771	0.636276	2.21041
232	2012-05-21	20.5708	56.0833	98.7533	3.25004	0.51182	0.0121624	0.0811655	0.0159788	0.077729	0.0107638	1.57429	0.495871	0.688211	1.9914
233	2012-05-24	21.2583	65.6667	98.5867	2.29062	0.415001	0.00836242	0.0182655	0.0111788	0.133029	0.00946376	3.04549	0.398171	1.12644	1.89686	1.96013
234	2012-05-27	17.5708	71.125	99.1038	4.50432	0.713141	0.0239624	0.0559655	0.0107788	0.062629	0.0209638	1.43229	0.787271	0.759589	2.54747	2.62736
235	2012-05-30	17.2833	58.2917	98.1238	7.08634	0.495062	0.0103624	0.0178655	0.00907885	0.099529	0.0174638	1.02849	0.637871	0.580489	2.58864
236	2012-06-02	13.5625	70.5417	97.62	1.15751	0.217455	0.0145624	0.0137655	0.00317885	0.020029	0.0219638	1.09199	0.446071	0.566134	2.13677	2.17836
237	2012-06-05	14.4958	66.125	98.6629	2.13889	0.221862	0.0206624	0.0165655	0.00987885	0.045229	0.0205638	1.09879	0.883471	0.661189	2.31649	2.39563
238	2012-06-08	19.4625	57.6667	98.635	3.39073	0.306802	0.0132624	0.0260655	0.0108788	0.076029	0.0177638	1.33949	0.357371	0.596085	2.08114
239	2012-06-11	21.5125	72.625	98.7512	2.29788	1.35583	0.0248624	0.0571655	0.0131788	0.082329	0.0252638	6.00479	1.60907	2.60412	2.04538	2.0837
240	2012-06-17	21.7167	70.2083	98.5792	1.38845	1.4247	0.0178624	0.0246655	0.00697885	0.030429	0.0159638	3.38969	0.336071	1.21647	1.70922	1.73733
241	2012-06-20	26.8625	56.0417	98.9467	2.07302	0.87518	0.245162	0.0393655	0.0188788	0.063929	0.0184638	4.11989	0.318971	1.31027	1.42622
242	2012-06-23	19.45	60.3333	98.8429	3.38163	0.279569	0.0101624	0.0153655	0.00467885	0.030229	0.0228638	0.574394	0.176571	0.279224	2.10431	2.18511
243	2012-06-26	18.7333	55.4167	98.5675	2.27326	0.291415	0.00846243	0.0182655	0.00697885	0.046729	0.0111638	0.511394	0.064671	0.258376	1.91457
244	2012-06-29	22.33	73.7	98.012	3.25115	0.89022	0.0304624	0.0621655	0.0150788	0.113129	0.0351638	4.35919	0.452071	1.68027	2.12164	2.17306
245	2012-07-02	23.2	54.1667	98.7862	2.0734	0.751726	0.232562	0.0933655	0.0135788	0.042329	0.00746376	0.850794	0.176871	0.345547	1.6301
246	2012-07-05	25.0273	74.4091	98.4627	4.33438	0.906841	0.0417624	0.0725655	0.00957885	0.046729	0.00366376	2.78239	0.982671	1.18352	2.1374	2.18233
247	2012-07-08	23.0458	56.5417	98.6946	2.35307	0.974757	0.00446242	0.0157655	0.00587884	0.032529	0.00926376	1.09179	0.173471	0.394334	1.71137
248	2012-07-11	22.1143	49.1429	99.289	1.44529	0.977028	0.0222624	0.0121655	0.0128788	0.110729	0.00886376	2.35339	0.170071	0.83275	1.46535
249	2012-07-14	22.7542	67.0833	99.1904	0.730125	1.64468	0.0106624	0.0167655	0.00467885	0.024929	0.00306376	3.09099	0.209271	1.10442	1.344	1.36847
250	2012-07-17	28.7792	58.5417	98.1146	2.27217	1.67382	0.0297624	0.0381655	0.0128788	0.077929	0.0212638	3.62739	0.161471	1.18152	1.41296
251	2012-07-20	19.9667	56.375	98.8875	2.39094	0.413104	0	0.00736554	0.00357885	0.034529	0.00686376	0.313594	0.097671	0.181966	1.8838
252	2012-07-23	26.9458	65.3333	98.4429	2.27995	0.833752	0.0167624	0.0316655	0.00877885	0.055429	0.0177638	4.39049	0.417071	1.73208	1.62984	1.65546
253	2012-07-26	22.9458	81.75	97.6246	2.49429	0.732084	0.0327624	0.0142655	0.00417884	0.036229	0.0149638	1.30779	0.321871	0.613753	2.13926	2.19411
254	2012-07-29	21.7292	58.7083	98.9571	2.65909	0.586375	0.0450624	0.0262655	0.00337885	0.017529	0.0322638	0.645194	0.182371	0.266166	1.86019
255	2012-08-01	22.4667	66.25	98.4096	3.23984	0.412912	0.00226243	0.00466554	0.00437885	0.032529	0.00646376	0.677694	0.345771	0.310508	2.00462	2.05508
256	2012-08-04	26.0125	68.6667	98.7613	2.21636	0.607967	0.0207624	0.0411655	0.00697885	0.043829	0.0107638	6.07029	0.615571	1.93941	1.63098	1.65253
257	2012-08-07	20.5458	63.5833	98.69	1.81935	0.365161	0	0.00736554	0.00387885	0.017029	0.00396376	1.66109	0.209571	0.592534	1.80086	1.81504
258	2012-08-10	19.8625	84.125	97.8275	1.02402	0.455216	0.00116242	0.00766554	0.00127885	0.00692896	0.00596376	2.21279	1.13407	1.06358	2.02414	2.03187
259	2012-08-13	20.2208	72	98.7233	2.28798	0.336734	0	0.0107655	0.00377884	0.019629	0.00386376	1.16699	0.162471	0.440834	2.03992	2.06115
260	2012-08-16	20.5708	75.5833	98.4492	2.09656	1.13524	0.00166242	0.0317655	0.00297884	0.012429	0.00656376	3.77239	0.827271	1.40073	2.04304	2.05466
261	2012-08-19	16.7208	69.5	98.5675	1.99846	0.374388	0.0113624	0.0220655	0.00327884	0.020129	0.0145638	1.26049	0.296571	0.498837	2.13979	2.17355
262	2012-08-22	17.9875	70.4167	99.1737	1.12071	0.498875	0.00126242	0.0165655	0.00647884	0.132029	0.0101638	3.98809	1.25327	1.56758	1.84599	1.91412
263	2012-08-25	21.8917	66.625	99.3104	0.950501	0.437229	0.00406242	0.0346655	0.00557884	0.049329	6.38e-05	8.20159	0.559871	2.66577	1.36862	1.39557
264	2012-08-28	20.1792	68.8333	98.8079	4.19168	0.0976039	0.0139624	0.0205655	0.00497884	0.043529	0.0275638	1.32339	0.454871	0.505447	2.26535	2.31144
265	2012-08-31	24.4333	64.5833	98.745	2.45673	0.557826	0.0306624	0.0380655	0.0107788	0.061629	0.0257638	4.19689	0.362571	1.40893	1.73057	1.76624
266	2012-09-03	22.9083	68.4167	98.6946	1.64755	0.45116	0.0268624	0.0548655	0.00747884	0.040429	0.0159638	5.09239	0.279971	1.59922	1.63563	1.66919
267	2012-09-09	14.4625	75.5	98.5321	2.14943	0.083002	0.00896242	0	0.00247884	0.00442896	0.00376376	0.311394	0.150871	0.110921	2.37566	2.41505
268	2012-09-12	17.4333	69.875	99.5571	1.03476	0.215535	0.0163624	0.0222655	0.00577885	0.025129	0.0122638	3.72699	0.402271	1.30525	1.7734	1.80209
269	2012-09-15	12.7125	71.5417	99.5062	1.67551	0.0268028	0	0.00826554	0.00217885	0.015529	0.00866376	0.255894	0.129971	0.102785	3.30645	2.37034
270	2012-09-18	14.7708	84.4167	97.6404	0.868643	0.158888	0	0.00766554	0.00207885	0.00912896	0.00426376	1.33819	0.257371	0.527137	2.15143	2.16586
271	2012-09-21	14.9522	68.8261	98.4	1.59216	0.0958344	0.00666242	0.0233655	0.0120788	0.055329	0.0121638	1.03659	0.406471	0.42546	2.12712	2.21655
272	2012-09-24	9.925	65.2917	99.0221	1.10514	0.0212188	0.00266242	0.00546554	0.00347884	0.019029	0.00956376	0.556594	0.167271	0.221082	2.18517	2.23391
273	2012-09-27	10.1042	68.9583	99.4346	0.790287	0.0484313	0.00236243	0.0156655	0.00527884	0.036829	0.00476376	0.522694	0.182371	0.219282	2.08614	2.19337
274	2012-09-30	12.0792	72.7083	98.4771	0.881841	0.0769902	0	0.0108655	0.00167884	0.00692896	0	0.917594	0.690271	0.535734	2.16948	2.18634
275	2012-10-03	17.0208	82.75	98.8208	1.11036	0.0979917	0	0.0107655	0.00217885	0.013529	0.00456376	2.41249	1.26267	1.24573	2.20282	2.21524
276	2012-10-06	7.78636	71.2273	98.6173	0.827746	0	0.0617624	0.00606554	0.00397884	0.022729	0.00876376	0.973494	1.11617	0.691989	2.45949	2.54601
277	2012-10-09	9.175	67.4583	98.9733	0.491838	0.0406538	0.00666242	0.0204655	0.00397884	0.028929	0.00896376	2.76029	0.810271	1.24173	2.02651	2.06785
278	2012-10-12	4.91667	66.7083	99.8021	0.714955	0	0.133262	0.00716554	0.00377884	0.020329	0.0136638	1.11329	0.205971	0.472727	2.32714	2.49359
279	2012-10-18	12.6	71.7917	97.6688	0.599204	0.14304	0.00506242	0.0145655	0.00407885	0.032729	0.0101638	1.33479	0.193471	0.522837	1.87069	1.92344
280	2012-10-21	8.80417	81.2917	98.8196	0.999653	0	0.00426243	0.0203655	0.00137885	0.012329	0.0186638	1.68329	1.64097	1.15419	2.64845	2.66835
281	2012-10-24	11.0208	93.4583	98.9921	0.617104	0.265911	0	0.0114655	0.00117884	0.010529	0.0397638	1.87199	2.92947	1.52407	2.64528	2.65973
282	2012-10-27	5.96087	92.2609	99.1064	0.304789	0	0	0.00486554	0.000778845	0.00712896	0.00606376	0.394194	0.126071	0.191869	2.49415	2.5272
283	2012-10-31	6.25833	95.5833	96.8583	0.230743	0.0220637	0.00716243	0.0180655	0.00287885	0.00772896	0	0.0810944	0.074571	0.0509434	2.57132	2.95617
284	2012-11-02	2.9625	78.9167	98.1146	0.702326	0	0.00276243	0.0164655	0.00247884	0.00292896	0.00186376	0.0514944	0.024671	0.0291789	2.5955	3.09594
285	2012-11-08	0.279167	75.875	99.1775	2.15266	0.17005	0.153262	0.140566	0.0149788	0.339429	0.0652638	1.00159	2.95827	0.866676	3.35706	3.65842
286	2012-11-11	14.1435	51.3913	99.287	1.04772	0.239485	0.0307624	0.0851655	0.00687884	0.029929	0.0162638	2.27919	0.341871	0.905595	1.78758
287	2012-11-14	0.358333	70.625	100.511	1.17272	0.0771572	0.00936243	0.0365655	0.00567885	0.018729	0	1.49779	2.00157	1.12212	3.03612	3.07503
288	2012-11-17	1.12917	85.875	100.643	1.54356	0.270409	0.0198624	0.100366	0.00377884	0.030929	0.122764	3.35609	11.8019	4.67608	3.395	3.43155
289	2012-11-20	4.04583	84.4583	99.2558	1.36183	0.14669	0.0402624	0.261766	0.00507885	0.033429	0.137864	2.98649	9.96787	3.92633	3.12193	3.1987
290	2012-11-23	7.075	69.9583	97.9237	0.534201	0.167022	0.00916243	0.0386655	0.00577885	0.016829	0	2.20099	0.914271	1.08334	2.23153	2.27784
291	2012-11-26	-0.258333	65.7917	99.0721	1.02053	0.0115047	0.0275624	0.0493655	0.00677885	0.026629	0	1.25659	1.27177	0.796318	2.91945	2.99809
292	2012-11-29	1.4375	68.625	99.5154	1.11892	0.299322	0.0141624	0.0665655	0.00717884	0.049929	0.00796376	1.78399	6.05367	2.35855	2.96673	3.02386
293	2012-12-02	9.95417	88	98.7417	0.471962	0.273432	0.0153624	0.0609655	0.00247884	0.00922896	0.0291638	2.85139	1.82337	1.67282	2.44076	2.48158
294	2012-12-05	0.229167	72.0417	99.5512	0.458392	0	0.0336624	0.0144655	0.00697885	0.00452896	0.0105638	0.337494	0.261371	0.183321	2.56558	2.70491
295	2012-12-08	3.17917	93.1667	98.4171	0.609838	0.0362128	0.00426243	0.0437655	0.00117884	0.011229	0.0348638	2.13819	2.01777	1.44051	3.08977	3.12229
296	2012-12-11	-0.991667	72.6667	98.6538	0.429814	0	0.00626243	0.0210655	0.00557884	0.027129	0	1.22759	0.674171	0.635211	2.63609	2.70246
297	2012-12-14	1.7875	74.0833	99.387	0.704318	0.283581	0.00636242	0.0728655	0.00907885	0.041529	0.0185638	2.12829	5.59167	2.43998	2.83217	2.89469
298	2012-12-17	6.08333	79.9583	97.6088	0.714502	0.0182723	0.0133624	0.0529655	0.00597884	0.029729	0.0160638	1.51709	1.91747	1.14232	2.66031	2.71616
299	2012-12-20	2.175	88.2083	97.9292	0.531505	0.0463548	0.00836242	0.0824655	0.00447885	0.017129	0.0126638	1.54879	4.83497	2.04399	2.99282	3.04931
300	2012-12-23	-1.3625	74.625	98.39	0.113218	0.137786	0	0.0269655	0.00447885	0.015629	0	0.895194	2.72047	1.16457	2.49706	2.55505
301	2012-12-29	-4.1875	86.625	98.1454	0.432763	0.566362	0.0424624	0.0376655	0.00867884	0.022329	0.00416376	1.79979	3.05977	1.6254	3.09256	3.19914
302	2013-01-01	-5.7	69.8333	98.7417	0.681999	0.0162737	0.0233624	0.0470655	0.00557884	0.032429	0	1.36629	0.660871	0.693447	3.07692	3.15551
303	2013-01-04	-2.84583	73.3333	98.7488	0.167083	0.0917873	0.00556243	0.0504655	0.00637885	0.022829	0	1.93949	4.68457	2.15689	2.66978	2.75463
304	2013-01-07	-2.78333	76.8333	99.6233	0.158666	0.0354433	0	0.0397655	0.00447885	0.015529	0	2.37569	2.80727	1.78479	2.66301	2.72492
305	2013-01-10	0.258333	72.1667	100.337	0.734593	0.0867808	0.00106243	0.0346655	0.00547885	0.032229	0	0.681094	1.66547	0.745701	2.92377	2.98574
306	2013-01-13	9.26667	92.875	98.1029	0.503982	0.0901404	0.00586243	0.0166655	0.00407885	0.00852896	0	1.13599	0.946571	0.717169	2.63395	2.66669
307	2013-01-16	-1.575	77.2917	98.4458	0.575479	0.172895	0.0717624	0.0638655	0.00637885	0.042929	0.0152638	1.60999	4.29257	1.82779	2.96591	3.08519
308	2013-01-19	4.5625	59.0417	98.2338	0.526815	0.400711	0.0394624	0.0251655	0.00287885	0.019129	0.00986376	0.834094	1.02277	0.609582	2.32472
309	2013-01-22	-14.8375	52.4167	99.0454	0.288116	0.129152	0.113962	0.0267655	0.0169788	0.035429	0.0262638	0.696694	0.502171	0.305979	2.54361
310	2013-01-25	-10.8375	82.4583	99.4479	0.588172	0.096304	0.0720624	0.0469655	0.00597884	0.017729	0.0311638	0.765194	1.01947	0.533466	3.59199
311	2013-01-28	1.52083	93.5	98.6925	0.111253	0.243426	0.0370624	0.0458655	0.00347884	0.029829	0.0361638	2.50769	1.66787	1.49628	2.5484	2.72603
312	2013-01-31	-3.39583	75.4583	96.9838	0.100909	0.00583825	0.0388624	0.0261655	0.00377884	0.022429	0.0224638	0.697094	0.375471	0.339176	2.22708	2.44456
313	2013-02-06	-6.07083	71.4583	99.2458	0.403922	0.71593	0.0657624	0.0409655	0.00467885	0.026229	0.0507638	1.26899	1.69917	0.947785	2.75198	2.94472
314	2013-02-09	-12.1458	77.5833	99.8517	0.342426	0.95819	0.0393624	0.0302655	0.00307885	0.013229	0.0331638	1.08719	1.39657	0.82073	2.91787
315	2013-02-12	-0.475	73.5833	98.4083	0.107672	0.294049	0.0383624	0.0211655	0.00437885	0.019729	0.0154638	2.39179	1.11687	1.23768	2.1572	2.2779
316	2013-02-15	-2.68333	69.875	98.545	0.455075	0.379719	0.0663624	0.0158655	0.00837884	0.019229	0.0335638	0.929694	0.606371	0.493111	2.67265	2.81907
317	2013-02-18	-6.15417	68.7083	98.9929	0.252683	0.523954	0.0675624	0.0230655	0.00547885	0.015729	0.0106638	0.957494	0.834271	0.554869	2.41466	2.66666
318	2013-02-21	-8.78333	74	99.5858	0.391617	0.262859	0.159462	0.0107655	0.0160788	0.012929	0.161264	0.763594	0.946171	0.513801	3.06767	3.36103
319	2013-02-24	-2.49167	77.2917	98.5938	0.298577	0.24846	0.00666242	0.0390655	0.00477885	0.00762896	0.00116376	3.20169	3.76297	2.1667	2.48253	2.54897
320	2013-02-27	0.570833	94	97.3487	0.288993	0.433197	0.0327624	0.0417655	0.00297884	0.00622896	0.0326638	0.917694	1.27947	0.669256	2.69473	2.83118
321	2013-03-02	-6.08333	77.2917	98.6021	0.373696	0.127121	0.0155624	0.0119655	0.00747884	0.015129	0	0.785194	0.515071	0.406485	2.92363	3.00364
322	2013-03-05	-5.2	77.625	98.7654	0.344211	0.3223	0.0711624	0.0235655	0.0145788	0.027129	0.0399638	1.70549	1.54897	0.977679	2.65642	2.87661
323	2013-03-08	0.308333	78.0833	99.9992	0.857848	0.126915	0.0170624	0.0167655	0.00697885	0.017829	0.0103638	1.33819	0.962171	0.737085	2.94023	2.9854
324	2013-03-11	7.6125	78.9583	97.92	0.462389	0.360538	0.0114624	0.0303655	0.00687884	0.023329	0	1.13149	0.398871	0.48664	2.19242	2.26981
325	2013-03-14	-2.9625	67.2083	99.055	0.53136	0.359686	0.0227624	0.0174655	0.00747884	0.020429	0.00336376	0.777794	0.288471	0.32734	2.69505	2.79712
326	2013-03-17	-4.11667	69.25	99.2908	1.01325	0.249674	0.0332624	0.0194655	0.00757884	0.018629	0.0165638	1.03259	0.927771	0.601366	3.17279	3.24361
327	2013-03-20	-4.4375	72.8333	98.1992	0.281344	0.203827	0.0200624	0.0274655	0.00797885	0.010529	0.00606376	1.23949	1.91177	0.95583	2.63132	2.73265
328	2013-03-23	-0.466667	72.5833	98.7642	0.94251	0.237245	0.00966243	0.0155655	0.00457884	0.010629	0	0.676894	0.601571	0.402834	2.97682	3.01985
329	2013-03-29	4.0875	60.2917	99.39	1.22024	0.230406	0.00946243	0.00786554	0.00427884	0.00432896	0	0.274494	0.597771	0.267669	2.74561	2.80811
330	2013-04-01	-0.445833	65.5	98.2133	0.560472	0.0644616	0.00926242	0.00426554	0.00347884	0.00122896	0	1.00509	0.301371	0.459879	2.56969	2.59556
331	2013-04-04	1.10417	46.0417	99.2254	0.507027	0.474669	0.0344624	0.0302655	0.00687884	0.012329	0.00326376	1.17819	0.611971	0.585421	2.17608
332	2013-04-07	10.0208	53.3333	98.1696	1.66627	0.494623	0.00586243	0.0344655	0.00707885	0.024329	0	2.18929	1.58837	1.26354	2.37144
333	2013-04-10	5.80833	94.5833	98.5692	0.563979	0.327631	0.00296242	0.0123655	0.00247884	0	0	1.75339	1.08267	0.96216	2.87179	2.88699
334	2013-04-13	3.4	79.9167	98.1579	0.347244	0.272336	0.00256243	0.00886554	0.00227884	0	0	1.32489	1.14077	0.822005	2.45149	2.46774
335	2013-04-16	11.8958	74.0417	98.9004	0.931504	0.324305	0.00536242	0.0101655	0.00367885	0.00152896	0	1.21399	0.497971	0.567818	2.18709
336	2013-04-19	10.2042	73.7083	97.2808	0.63341	0.171862	0.0169624	0.00906554	0.00477885	0	0	1.29109	0.548871	0.612869	2.12739	2.15527
337	2013-04-22	6.4625	53.4583	100.027	1.53499	0.327474	0.0174624	0.0353655	0.00767885	0.023729	0	1.99989	1.05217	0.993921	2.49309
338	2013-04-25	4.0125	80.9583	99.3242	0.648274	0.214087	0.00406242	0.0323655	0.00407885	0.00162896	0	1.91269	1.45927	1.10652	2.65624	2.68205
339	2013-04-28	10.7375	75.0833	98.8625	2.4671	0.544549	0.0153624	0.0527655	0.00747884	0.015329	0	2.88279	2.18347	1.69573	2.76394	2.7889
340	2013-05-01	17.7042	60.9167	99.6121	0.262397	0.00758723	0.00146243	0.00956554	0.00337885	0	0	0.0646944	0.086371	0.0555272	1.11885	1.30386
341	2013-05-04	14.1958	50.7083	99.3529	3.09166	0.462321	0.0159624	0.00256554	0.0103788	0.00392896	0	1.00059	1.15317	0.641708	2.35238
342	2013-05-07	16.7625	53.1667	98.9129	5.12891	1.63381	0.104262	0.0402655	0.0218788	0.034929	0	1.73679	1.42997	0.874137	2.48367
343	2013-05-10	15.225	79.9167	98.1504	5.6701	0.676864	0	0.00996554	0.00537885	0.013329	0	2.14659	1.97427	1.34553	2.97158	2.98196
344	2013-05-13	4.39583	62.5	99.0292	3.28592	0.459871	0	0.000665542	0.00327884	0.014229	0	0.659194	0.844571	0.462405	3.15844	3.17992
345	2013-05-16	16.4792	50.125	98.3204	6.3279	0.513746	0	0.0120655	0.0135788	0.184729	0.0310638	0.525594	0.529871	0.316895	2.49312
346	2013-05-19	18.4292	65.625	98.8733	3.39123	0.459534	0	0.0884655	0.00917884	0.015429	0	2.55269	1.06787	1.19321	2.26892	2.29946
347	2013-05-22	21.85	65.5	97.8883	3.12165	0.376917	0	0.0179655	0.0217788	0.402229	0	1.97319	0.430771	0.685192	1.99577	2.28515
348	2013-05-25	8.92083	54.0833	99.6567	4.85291	0.104441	0	0.00746554	0.00317885	0	0	0.425694	0.482471	0.27584	2.91148
349	2013-05-28	14.1208	88.5833	98.695	1.00224	0.730768	0	0.0202655	0.00207885	0.000928961	0	1.49459	0.989671	0.884185	2.46939	2.48108
350	2013-05-31	21.9833	74.1667	98.7825	0.047848	0.340509	0.0504624	0.0448655	0.0149788	0.082929	0	2.51219	0.439471	1.02303	0.978355	1.18552
351	2013-06-03	11.0042	65.3333	98.8004	1.65029	0.301235	0	0.00476554	0.00227884	0.010629	0	0.592294	0.274471	0.348637	2.36396	2.39006
352	2013-06-06	12.0417	76.7917	98.4575	0.731115	0.501809	0	0.0135655	0.00177885	0.00382896	0	0.871994	0.578871	0.54546	2.19535	2.21241
353	2013-06-09	16.5917	63.5	99.1896	4.70025	0.335421	0.00726243	0.0223655	0.00157884	0.00232896	0	3.52889	2.82257	2.11107	2.57112	2.58101
354	2013-06-12	18.9667	73.8333	98.3133	1.79112	0.150555	6.24e-05	0.0124655	0.00147884	0.010829	0	0.425294	0.247671	0.276692	2.0517	2.08573
355	2013-06-15	16.7125	70.0833	98.8512	2.19568	0.603287	0.0378624	0.0648655	0.00827884	0.00822896	0	1.94609	0.621371	0.899201	2.22842	2.2754
356	2013-06-18	17.2167	64.5833	98.6887	1.18581	0.35894	0.0112624	0.0348655	0.00477885	0.018429	0	0.550494	0.229371	0.293782	1.83719	1.92737
357	2013-06-21	18.8625	57.75	99.4758	1.91224	0.68104	0.00896242	0.0223655	0.00507885	0.019029	0	2.36599	0.359771	0.930911	1.86154
358	2013-06-24	25.0333	65.5833	98.8279	2.27243	0.747182	0.0116624	0.101666	0.00657884	0.030429	0	5.32949	0.581771	1.90107	1.69325	1.71856
359	2013-06-27	19.7375	86.9167	97.8767	2.12019	0.652889	0.000262425	0.0207655	0.00277884	0	0.00276376	2.69989	1.23057	1.3646	2.85138	2.41875
360	2013-06-30	19.15	72.0417	98.2163	1.60778	0.212911	0	0.287166	0.0141788	0	0.0230638	0.702394	0.170871	0.201205	1.9237	2.23392
361	2013-07-03	22.2333	79	99.1421	2.00216	0.671319	0	0.0883655	0.00367885	0	0	3.54529	0.557171	1.38505	2.00993	2.02701
362	2013-07-06	22.8125	78.125	99.1146	1.41651	0.560833	0	0.101466	0.0105788	0	0	3.13059	0.469071	1.04371	1.76577	1.79535
363	2013-07-09	22.6375	84.625	98.6821	1.58149	0.682947	0	0.0316655	0.00157884	0	0	3.87259	0.498471	1.73269	2.06196	2.0679
364	2013-07-12	20.075	70.6667	99.1858	1.85174	0.616158	0	0.00176554	0.00397884	0	0	1.06459	0.183771	0.418682	1.94205	1.9465
365	2013-07-18	27.875	70.625	98.9892	3.66679	0.6114	0.00726243	0.0105655	0.0116788	0.077529	0.00306376	4.53419	0.497571	1.50597	1.8213	1.84513
366	2013-07-21	20.9833	64.2083	98.6908	2.2845	0.559071	0.0156624	0.0238655	0.00337885	0	0.00496376	0.625294	0.132971	0.24416	1.89488	1.93377
367	2013-07-24	16.45	61.125	98.5954	0.965095	0.248774	0.0218624	0.00276554	0.00737885	0.023129	0.0186638	0.762294	0.091471	0.286505	1.71384	1.78693
368	2013-07-27	18.6042	83.9167	98.3279	1.38218	0.499379	0	0.0210655	0.00207885	0	0	4.31319	0.361771	1.57988	2.10817	2.11312
369	2013-07-30	17.925	72.0417	99.3787	2.58193	0.270474	0	0	0.00327884	0.030329	0.000763761	0.913994	0.326171	0.415253	2.23227	2.26381
370	2013-08-02	18.55	75.8333	98.3679	2.21182	0.268061	0	0.0100655	0.00557884	0.045729	0	1.65859	0.566771	0.667879	2.19051	2.22459
371	2013-08-05	14.5583	70.75	99.0487	1.38649	0.388301	0.00476242	0.0331655	0.00307885	0.018429	0.0135638	0.503694	0.149771	0.194356	2.11132	2.19053
372	2013-08-08	21.425	81.5	98.5843	2.45312	0.490661	0.00186243	0.00606554	0.00297884	0.019029	0.00806376	2.28929	0.725071	0.900479	2.19278	2.20517
373	2013-08-20	19.7625	75.125	99.1688	1.52216	0.751131	0.243762	0.0553655	0.00977884	0.062729	0.0353638	6.35379	0.810171	2.19877	1.87842	1.98651
374	2013-08-23	19.5542	65.9167	99.1612	1.57696	0.753306	0.0139624	0.00786554	0.00807884	0.051229	0	1.34369	0.313771	0.505782	1.83119	1.89093
375	2013-08-26	23.5042	74.4167	98.9296	1.95707	0.542016	0.00466243	0.0452655	0.00997885	0.076229	0.00416376	5.56559	0.615271	2.22246	1.87281	1.90386
376	2013-08-29	22.5833	79.1667	98.8896	1.87132	0.55995	0	0.0467655	0.00637885	0.025729	0	4.35489	1.14517	1.66365	1.96083	1.97957
377	2013-09-01	21.4	84.75	98.1283	1.88318	1.34164	0.00616243	0.0357655	0.00347884	0.00222896	0.0183638	3.60529	1.01927	1.54887	2.17944	2.19095
378	2013-09-04	18.4667	71.75	98.7929	2.15611	0.84505	0.0131624	6.55e-05	0.00527884	0.035729	0	1.25459	0.229671	0.462608	2.11234	2.15285
379	2013-09-07	16.7792	86.7083	98.6958	1.69431	0.487819	0.00916243	0.0223655	0.00387885	0.030129	0.00976376	2.16329	0.959971	0.978721	2.43727	2.46674
380	2013-09-10	25.7708	72.5833	98.6571	2.76033	0.537588	0.00956242	0.0931655	0.00947884	0.051029	0	6.69749	0.561971	2.15348	1.79909	1.8246
381	2013-09-13	11.425	71	98.6667	1.55394	0.373246	0	0.0133655	0.00547885	0.00812896	0	0.550294	0.804671	0.428124	2.48427	2.52211
382	2013-09-16	12.1542	75.875	99.5208	1.19915	0.280364	0	0.00756554	0.00497884	0.00272896	0	0.140494	0.050371	0.068395	2.26823	2.35654
383	2013-09-19	15.55	86.875	98.9587	0.866842	0.641961	0.0207624	0.0404655	0.00887884	0.019929	0.00786376	6.27799	1.21107	2.54281	2.15529	2.18996
384	2013-09-22	10.4917	70.7917	98.5646	1.06451	0.334131	0.00136243	0.00696554	0.00347884	0	0.00616376	0.687294	0.037771	0.262527	2.22093	2.2347
385	2013-09-25	12.125	70.6667	98.7412	1.06249	0.322244	0.0762624	0.0322655	0.0152788	0.049129	0.0164638	1.11199	0.820471	0.532327	2.19005	2.35416
386	2013-09-28	15.3333	73.375	99.4387	1.21121	0.268314	0.00856243	0.0309655	0.00557884	0.017329	0	1.79979	1.02817	0.916127	2.13096	2.16309
387	2013-10-01	16.1375	84.875	98.6992	1.44956	0.425123	0.0101624	0.0230655	0.00797885	0.015729	0	3.47069	0.869571	1.32852	2.29686	2.31943
388	2013-10-04	19.0292	89.125	98.7983	1.68819	0.622103	0.0146624	0.0226655	0.00477885	0.00332896	0.0119638	2.72219	1.38417	1.29087	2.39844	2.41478
389	2013-10-07	12.1167	78.6667	98.1025	1.11546	0.238904	0.000762425	0	0.00267885	0.011429	0	0.936794	0.143071	0.405618	2.29837	2.31519
390	2013-10-10	10.8042	82.5	99.4658	0.803986	0.492742	0.0176624	0.0240655	0.00347884	0.019229	0	1.33149	1.79727	1.01104	2.47342	2.50997
391	2013-10-13	15.8125	82.625	99.5008	1.39969	0.20121	0.0312624	0.0163655	0.00587884	0.016129	0	1.32819	0.540071	0.631021	2.30183	2.34969
392	2013-10-16	16.075	79.2917	98.1717	0.933101	0.152734	0.0134624	0.00966554	0.00337885	0.012729	0	1.83879	0.571371	0.837343	2.05239	2.07575
393	2013-10-22	4.99167	63.9583	98.2108	0.210889	0.0868576	0.0142624	6.55e-05	0.00287885	0.010829	0	0.199594	0.099871	0.112843	1.78878	1.93588
394	2013-10-25	4.15	76.7083	99.2788	1.10298	0.2801	0.0296624	0.00446554	0.00307885	0.00902896	0.0225638	0.543294	0.343071	0.31275	2.82217	2.87799
395	2013-10-28	5.78889	65.2222	99.38	1.53899	0.254293	0.0590624	0.00656554	0.00667885	0.031429	0	0.514294	0.649271	0.374376	2.75613	2.89048
396	2013-10-31	13.9708	88.9167	97.6883	1.02829	0.19551	0.109662	0.0445655	0.00417884	0.024929	0.00196376	2.64909	1.17717	1.3427	2.48217	2.56379
397	2013-11-03	-0.025	67.1667	99.8079	0.584088	0.0576218	0.0746624	0.0151655	0.00907885	0.014829	0.00786376	0.235094	0.221371	0.107676	2.62134	3.04496
398	2013-11-06	11.7833	71.2917	98.7633	0.5286	0.454122	0.0503624	0.0190655	0.00657884	0.023829	0	0.794694	0.169371	0.327837	1.86624	2.00744
399	2013-11-09	6.27917	68.5417	98.6462	1.11093	0.298102	0	0.0176655	0.00347884	0.00902896	0	1.16289	1.11107	0.764585	2.61361	2.63652
400	2013-11-12	-2.62083	76.4167	99.87	0.845459	0.165833	0.0109624	0	0.00417884	0.011029	0	0.334294	0.086371	0.155311	3.08516	3.13919
401	2013-11-15	7.55833	54.5417	98.895	0.579142	0.572467	0.0210624	0.0488655	0.00897884	0.045329	0	0.834594	0.745371	0.515737	2.08112
402	2013-11-18	5.92917	63.75	97.6775	0.484066	0.0886586	0.0117624	0.0180655	0.00657884	0.025129	0	0.846294	0.227071	0.401495	2.09796	2.1817
403	2013-11-21	3.22083	80.7083	99.7579	1.01107	0.543466	0.0299624	0.0404655	0.00767885	0.025829	0.00716376	1.15529	1.56417	0.899572	2.92573	2.98707
404	2013-11-24	-9.21667	72.8333	100.059	0.922515	0.0947874	0.0288624	0.0165655	0.00707885	0.019129	0	0.211794	0.116371	0.10966	3.53437	3.70085
405	2013-11-27	-3.52917	79.625	98.1592	1.8627	0.109774	0.0440624	0.0311655	0.00757884	0.035029	0	1.17419	1.42257	0.854647	3.60699	3.66496
406	2013-11-30	-2.825	78.2917	99.9479	0.441607	0.505111	0.0489624	0.0553655	0.00907885	0.038929	0	2.20169	2.05567	1.42627	2.79306	2.93251
407	2013-12-03	-1.8	81.125	98.4963	1.22578	0.178397	0.0203624	0.0358655	0.00687884	0.031429	0.00386376	1.44129	2.70097	1.3583	3.37439	3.42004
408	2013-12-06	-1.24167	68.0833	99.2779	1.41261	0.39325	0.0140624	0.0298655	0.00957885	0.053329	0	1.48839	1.27947	0.920269	3.1384	3.20611
409	2013-12-09	-1.38333	81.8333	98.5117	0.513179	0.163867	0.0177624	0.0372655	0.00627884	0.026029	0	2.64019	1.38927	1.41002	2.8843	2.9479
410	2013-12-12	-10.9304	68.6522	99.5252	0.537879	0.482836	0.0386624	0.0312655	0.00917884	0.026629	0	1.20989	1.24657	0.78224	3.2549
411	2013-12-15	-7.79583	80.0833	97.9146	0	0.238798	0.0716624	0.0538655	0.00777885	0.034329	0.00106376	1.77749	1.13277	0.978405	1.8718	2.431
412	2013-12-18	-3.52083	80.625	98.7212	0.276477	0.416779	0.0305624	0.0529655	0.00837884	0.031329	0.00366376	2.23649	5.63087	2.43558	2.65133	2.81185
413	2013-12-21	3.34167	97.375	97.9696	0.379091	0.587731	0.0203624	0.0314655	0.00537885	0.016129	0.0296638	1.04529	0.803271	0.664582	3.03348	3.13479
414	2013-12-24	-8.05833	79.875	99.7767	0.284942	0.111013	0.0274624	0.0292655	0.00687884	0.022129	0	1.22019	1.33957	0.869769	3.08544	3.19717
415	2013-12-30	-8.04583	67.25	99.085	0.210599	0.0203959	0.0325624	0.00686554	0	0.037729	0.00626376	0.562594	0.199571	0.243934	2.61615	2.76042
416	2014-01-15	-2.65417	76.125	98.2296	0.0451093	0.246345	0.0720624	0.0153655	0.00107884	0.00102896	0	0.698694	0.510271	0.339589	1.86031	2.10649
417	2014-01-17	-2.1625	81.5	97.8962	0.290552	0.173747	0.00206243	0.0163655	0	0.00602896	0.0253638	1.42969	2.58227	1.38559	2.87651	2.89986
418	2014-01-20	-6.77917	71.9167	97.8442	0.36576	0.30644	0.00206243	0.00236554	0	0	0	0.712694	0.874271	0.528137	2.93908	2.94969
419	2014-01-23	-14.2083	75.3333	99.2846	0.274389	0.374987	0.0490624	0.0293655	0	0.033029	0.0193638	1.29669	3.11127	1.4311	3.37848
420	2014-01-26	-13.0292	75.625	97.3504	0.326848	0.197453	0.0340624	0.0253655	0.0160788	0.017029	0.0243638	0.720694	2.98327	1.17275	3.49276
421	2014-01-29	-13.7917	67.875	99.0229	0.103559	0.486434	0.0590624	0.0253655	0.0100788	0.00302896	0.0183638	0.745694	1.21927	0.606492	1.93814
422	2014-02-01	-1.05833	92.5417	98.6725	0.293876	1.02071	0.0130624	0.0613655	0.00307885	0.00202896	0.0403638	1.89369	5.98827	2.49636	2.59921	2.71582
423	2014-02-04	-11.6565	79.0435	99.9104	0.910123	0.501898	0.0380624	0.0763655	0.00607885	0.019029	0.0963638	1.86869	7.31627	2.82865	3.84024
424	2014-02-07	-13.475	75.0833	99.5492	0	0.381504	0.110062	0.0953655	0.0140788	0.033029	0.0953638	1.22469	4.27627	1.82452	2.56811
425	2014-02-10	-13.2667	78.9583	99.3958	0.399309	0.729353	0.0300624	0.0643655	0.00807884	0.028029	0	2.49869	5.14327	2.41688	3.31049
426	2014-02-13	-11.45	74.5417	98.2796	0.202597	0.993559	0.0870624	0.0993655	0.0100788	0.027029	0.0683638	2.70069	6.04927	2.62385	1.65187
427	2014-02-19	0.533333	73.1667	97.9279	0.207315	1.29198	0.0140624	0.0503655	0.00407885	0.018029	0.0523638	2.52769	5.60327	2.57349	2.13054	2.1897
428	2014-02-22	1.025	59.7083	98.1663	0.514352	0.826601	0.00506242	0.0193655	0.00407885	0.018029	0	0.385694	0.850271	0.360685	2.47901
429	2014-02-25	-8.94583	72.2083	98.805	0.256823	0.659215	0.0330624	0.0313655	0.00807884	0.021029	0	1.74169	0.627271	0.77375	2.29014	2.58864
430	2014-03-06	-11.1958	64.3333	100.116	0.560069	0.884661	0.118062	0.0363655	0.0160788	0.093029	0.0253638	1.38869	2.37527	1.15607	3.11874
431	2014-03-09	-6.675	75.2917	98.8743	0.440017	0.884588	0.00306243	0.0353655	0.00807884	0	0.00136376	2.77069	1.45027	1.49317	2.83245	2.88998
432	2014-03-12	-4.57917	88.75	97.475	0.296601	1.17805	0.0200624	0.0133655	0.00707885	0	0	1.20169	1.34927	0.820234	2.19363	2.31785
433	2014-03-15	-0.5875	70.5833	98.4163	0.803708	1.871	0.0110624	0.0153655	0.00707885	0	0	1.10469	1.32527	0.787621	2.64305	2.67808
434	2014-03-27	-2.19167	65.3333	98.9529	0.433394	1.51088	0.0180624	0.0343655	0.00807884	0.012029	0.0213638	1.92669	2.41527	1.4522	2.32106	2.40873
435	2014-03-30	1.175	60.75	98.8846	1.5495	1.36029	0.103062	0.0203655	0.00907885	0.022029	0.0393638	0.880694	0.435271	0.431363	2.91172	3.04541
436	2014-04-02	2.71667	68.1667	99.1275	1.90362	1.14094	0.0210624	0.0223655	0.0130788	0.030029	0.0113638	1.35669	2.08927	1.08401	3.04899	3.09403
437	2014-04-05	0.833333	70.4583	98.615	0.682983	0.638951	0	0.0113655	0.00607885	0	0.00736376	0.919694	0.407271	0.442266	2.64622	2.67012
438	2014-04-08	5.92727	76.5	97.1409	1.23893	1.67782	0	0.0213655	0.00407885	0	0	1.23769	0.174	0.498961	2.6513	2.66784
439	2014-04-11	8.30417	69.5238	98.7642	1.51209	1.99694	6.24e-05	0.0453655	0.00707885	0.023029	0.00836376	1.36569	2.42127	1.23962	2.62198	2.65225
440	2014-04-14	13.5167	74.0417	97.5429	1.1412	1.80761	0.0800624	0.0323655	0.00807884	0.016029	0.00636376	1.50669	0.377271	0.625782	2.17466	2.26224
441	2014-04-17	4.40833	56.625	100.11	0.751505	1.98948	0.0400624	0.0573655	0.0120788	0.064029	0.0123638	1.69869	1.25627	0.915105	2.18588
442	2014-04-20	10.4083	47.875	99.6954	1.67306	1.17005	0	0.0333655	0.00807884	0.016029	0	2.52769	0.611271	1.09694	2.2096
443	2014-04-26	5.20417	81.7391	98.3588	2.68623	0.59177	0	0.0283655	0.00507885	0.070029	0.0103638	1.91169	2.90127	1.61127	3.27901	3.31249
444	2014-04-29	10.3667	77.375	98.2617	0.920637	1.11421	0.00906243	0.0123655	0.00407885	0	0.0153638	0.594694	0.502271	0.346976	2.39515	2.42306
445	2014-05-08	14.2667	70.625	98.8546	4.55501	0	0.0410624	0.0673655	0.0120788	0.041029	0.0123638	2.37169	4.05727	2.01859	2.84035	2.87808
446	2014-05-11	13.8609	58.125	98.9546	3.70322	0.449883	0.0110624	0.0403655	0.00907885	0.025029	0.00536376	1.44269	2.77427	1.33972	2.64387
447	2014-05-14	16.7875	92.7083	98.9483	4.89881	1.12774	0.0170624	0.0383655	0.00407885	0.032029	0.0193638	1.99469	3.23627	1.75562	3.18894	3.21006
448	2014-05-17	6.2	80.4348	99.0212	1.74634	1.24487	0	0.0283655	0.00207885	0.011029	0	1.35169	0.886271	0.723847	2.92287	2.94191
449	2014-05-20	10.9042	78.375	99.0637	2.17362	0.650428	0.0120624	0.0553655	0.0110788	0.065029	0	2.03569	0.876271	0.97846	2.71038	2.76705
450	2014-05-23	9.88333	86.4167	98.9125	2.60628	0.104172	0.343062	0.0203655	0.00107884	0.027029	0.0123638	0.481694	0.387271	0.26133	3.04541	4.29073
451	2014-05-26	19.8	59.5833	98.8154	2.81002	0.625703	0.00906243	0.0383655	0.0150788	0.218029	0	2.39569	0.371271	0.957782	2.00206
452	2014-05-29	15.6476	72.0952	99.1829	1.89616	0.414971	0.00206243	0.0133655	0.00107884	0.020029	0	0.769694	0.631271	0.445653	2.2659	2.30067
453	2014-06-01	17.95	58.1667	99.3238	2.56869	0.419632	0.0240624	0.0463655	0.0130788	0.102029	0	1.13469	0.314271	0.458621	2.04026
454	2014-06-04	15.7	76.6667	98.3429	4.11015	0.624071	0.0230624	0.0253655	0.00907885	0.203029	0.00136376	0.477694	0.560271	0.308589	2.74643	3.12924
455	2014-06-10	19.7333	69.9583	98.6021	2.64867	0.416403	0.0210624	0.0413655	0.00707885	0.053029	0	1.66369	1.00227	0.833556	2.14773	2.20732
456	2014-06-13	17.9542	73.75	98.1408	5.70434	0.344047	0	0.0103655	0.00207885	0.026029	0	1.45269	1.41627	0.917814	2.70391	2.72374
457	2014-06-16	21.8458	71.25	98.8704	4.42221	0.365101	0.00906243	0.0303655	0.0110788	0.150029	0	2.29469	0.700271	0.89133	2.246	2.32419
458	2014-06-19	19.9917	66.125	99.1088	2.40092	0.261774	0.00806242	0.0163655	0.00607885	0.046029	0	0.864694	1.67427	0.746718	2.08429	2.15933
459	2014-06-22	18.9083	55.25	98.675	2.92849	0.554223	0.0100624	0.0413655	0.00707885	0.072029	0	0.535694	0.447271	0.268266	2.02491
460	2014-06-25	21.9542	82.8333	98.4621	6.95984	0.250257	0.0500624	0.0273655	0.00507885	0.069029	0	2.44169	2.07727	1.52246	2.73654	2.77971
461	2014-06-28	23.3333	66.7917	99.2508	5.20658	0.612182	0.00806242	0.0543655	0.00607885	0.027029	0	4.80769	1.05927	1.96833	2.18941	2.20433
462	2014-07-01	25.2875	70	97.8592	2.33264	0.347531	0.0600624	0.0373655	0.0100788	0.034029	0.00336376	2.28269	0.327271	0.69604	1.73401	1.78682
463	2014-07-04	15.4417	64.7917	99.4525	2.41629	0.180745	0	0.00836554	0.00707885	0.051029	0	0.233694	0.146271	0.0980724	2.21983	2.58966
464	2014-07-07	21.7958	85.1667	97.7525	1.52274	0.473651	0	0.0933655	0.0130788	0.037029	0	3.65669	0.593271	1.46417	2.05794	2.10056
465	2014-07-10	16.4917	71.5833	99.2275	1.84271	0.228537	0	0.0113655	0.00407885	0.032029	0	0.614694	0.274271	0.26533	2.14733	2.20883
466	2014-07-13	23.2792	78.375	98.2387	1.69898	0.415705	0.0100624	0.0563655	0.00607885	0.030029	0	4.20669	0.410271	1.46991	1.83734	1.86306
467	2014-07-16	15.7917	76.125	98.4033	1.2702	0.368657	0.0230624	0.0123655	0.00207885	0.020029	0	0.547694	0.160271	0.209976	2.08932	2.17222
468	2014-07-19	16.6583	93.9167	99.1917	1.43611	0.464608	0.0230624	0.0343655	0.00107884	0.014029	0.00136376	2.53469	0.631271	1.10736	2.63404	2.66357
469	2014-07-22	22.3875	72.5833	98.9546	1.18517	0.369098	0.0750624	0.0393655	0.00307885	0.030029	0.0293638	6.16669	0.386271	2.51856	1.72861	1.76511
470	2014-07-25	16.3	71.7083	98.8612	1.25531	0.242723	0.00406242	0.00736554	0.00707885	0.060029	0	1.32069	0.175271	0.462008	1.96688	2.0305
471	2014-08-03	20.125	80.5417	99.0642	1.44863	0.760614	6.24e-05	0.0813655	0.00507885	0.015029	0	3.42969	0.984271	1.55823	2.06681	2.09267
472	2014-08-06	18.6042	72.2083	98.7854	1.52087	0.227354	0.00406242	0.0363655	0.00507885	0.047029	0	0.832694	0.251271	0.353072	1.95922	2.04588
473	2014-08-09	18.0625	70.5	99.2396	1.65213	0.395288	0.0410624	0.0433655	0.00407885	0.031029	0	0.972694	0.340271	0.39975	2.00071	2.09617
474	2014-08-12	19.7625	88.3333	97.8208	0.798937	0.17905	0	0.0183655	0.00107884	0.016029	0	2.60869	0.319271	0.952814	1.93757	1.95498
475	2014-08-18	16.3458	78.0833	98.5379	1.57856	0.143884	0	0.00536554	0.00107884	0.024029	0	1.04869	0.325271	0.475653	2.20795	2.23193
476	2014-08-21	21.2417	82.2083	98.6496	2.17751	0.223599	0	0.0123655	0.00407885	0.028029	0	1.58269	0.723271	0.675718	2.17222	2.19635
477	2014-08-24	19.9348	81.1739	99.1965	1.26563	0.168689	0	0.0143655	7.88e-05	0.00702896	0	1.03169	0.374271	0.435137	1.97356	1.98541
478	2014-08-27	20.0292	67.9583	98.9942	3.06592	0.758895	0	0.0103655	0.00907885	0.210029	0.00936376	0.878694	0.317271	0.306718	2.12902	2.45289
479	2014-08-30	22.4542	73	98.7379	1.9727	1.5358	0.0110624	0.0393655	0.00507885	0.059029	0.00536376	2.41069	0.233271	0.794008	1.85874	1.90264
480	2014-09-02	20.5583	92.7917	98.2954	2.27557	1.51412	0.00206243	0.0153655	0.00207885	0.020029	0.00936376	2.31769	0.822271	1.02872	2.5708	2.58573
481	2014-09-05	24.7458	77.75	98.7267	1.07591	1.54397	0.0150624	0.0283655	0.00707885	0.049029	0	4.83469	0.233271	1.49769	1.47658	1.5128
482	2014-09-11	14.7583	84	98.4275	1.20265	0.570235	0.00406242	0.00936554	0.00107884	0.023029	0.00636376	0.605694	0.064271	0.198847	2.28374	2.33479
483	2014-09-14	9.175	70.5	99.7075	0.685539	0.400535	0.0120624	0.0133655	0.00207885	0.037029	0.0553638	0.700694	0.105271	0.253427	2.09228	2.18476
484	2014-09-20	17.9167	79.9583	98.5346	1.50312	0.63202	0.00106243	0.0193655	0.00307885	0.036029	0.00636376	1.54669	0.825271	0.762911	2.18104	2.21607
485	2014-09-23	11.3792	78.125	99.8	1.71626	0.453427	0.145062	0.0123655	0.00307885	0.051029	0.0343638	1.37269	0.412271	0.547976	2.53732	2.67643
486	2014-09-26	14.3542	73.1429	99.7358	1.52258	0.880919	0.00506242	0.0313655	0.00807884	0.046029	0	1.79669	2.75227	1.44469	2.41209	2.44985
487	2014-09-29	16.3458	80.1667	98.6204	3.00205	0.686056	0	0.0323655	0.00907885	0.030029	0	3.61969	1.77427	1.9001	2.60129	2.62025
488	2014-10-02	17.1375	83.9167	98.8529	1.07385	0.362698	0.00806242	0.0453655	0.00507885	0.014029	0.0133638	5.96369	2.55027	3.05427	2.2687	2.28633
489	2014-10-05	7.48333	74.9583	97.7992	0.841391	0	0.0100624	0.0193655	0.00407885	0.00502896	0.0163638	0.831694	0.267271	0.407879	2.39701	2.43365
490	2014-10-08	10.6792	68.0417	98.1508	0.548399	0.0231432	0	0.0213655	0.00807884	0.021029	0	1.43269	1.60427	0.997234	2.15123	2.19368
491	2014-10-11	5.625	71.9545	99.3242	1.21884	0.0929322	0.681062	0.0193655	0.00307885	2.9e-05	0.00536376	0.403694	0.396271	0.241105	2.69397
492	2014-10-14	18.8	83.5833	98.0904	0.927234	0.153093	0.0350624	0.0383655	0.00707885	0.012029	0.0123638	1.46069	0.211271	0.524589	2.39918	1.98627
493	2014-10-17	13.1125	85.7917	97.3104	0.962067	0.0831161	0.00406242	0.0253655	0.00407885	0.00302896	0.00636376	2.46669	1.12227	1.22501	2.40906	2.42546
494	2014-10-23	7.84583	78.25	99.1892	1.69561	0	0.0510624	0.0303655	0.00707885	0.022029	0.0103638	0.466694	0.286271	0.234298	2.75034	2.93183
495	2014-10-26	7.475	71.125	98.1575	1.90438	0	0.00406242	0.0423655	0.00707885	0.030029	0.0103638	0.270694	0.223271	0.133685	2.69169	2.93684
496	2014-10-29	8.83333	68.5833	98.4808	2.53209	0.0273261	0	0.0213655	0.00907885	0.077029	0	0.521694	0.486271	0.327137	2.76316	2.93043
497	2014-11-01	1.41667	78.2917	99.2512	0.47537	0	0	0	0.00307885	0	0	0.203694	0.133271	0.0917821	2.55186	2.5705
498	2014-11-04	11.925	67.4167	98.5796	1.19007	0.41483	0	0.0473655	0.00707885	0.034029	0	1.25269	0.376271	0.561685	2.17978	2.2425
499	2014-11-07	1.5625	77.125	98.5867	1.13674	0	0	0.00536554	0.00407885	0.00402896	0	1.04469	0.166271	0.447718	2.88851	2.90139
500	2014-11-10	7.23333	68	98.4767	2.82461	0.271069	0.00106243	0.0393655	0.0110788	0.051029	0	1.40969	2.08627	1.12933	2.98896	3.03393
501	2014-11-13	-1.0375	72.9583	99.0883	0.933605	0.0386198	0	0.0113655	0.00507885	0.00602896	0	0.719694	1.02327	0.575298	3.07064	3.09585
502	2014-11-16	-1.85	89.875	99.0292	0.624004	0.333764	0.00906243	0.0603655	0.00507885	0.00402896	0.0533638	2.68669	9.45327	3.78369	3.27093	3.3092
503	2014-11-19	-6.85833	86.2083	98.4513	0.378939	0.145475	0	0.0253655	0.00507885	0.00102896	0	1.52569	2.60327	1.38314	3.30252	3.3334
504	2014-11-22	1.20435	87.9167	99.0454	0.362904	0.359992	0.0120624	0.0723655	0.00607885	0.00102896	0.0453638	1.97369	2.34927	1.5042	2.79634	2.86059
505	2014-11-25	1.64211	75.4211	98.4784	0.590217	0.0291522	0	0.0173655	0.00607885	0.010029	0.000363761	1.89769	0.831271	0.950976	2.6494	2.67782
506	2014-11-28	-5.175	71.5833	99.5333	0.660447	0.111355	0.00206243	0.0123655	0.00307885	0.025029	0	0.750694	0.312271	0.368201	3.04956	3.10002
507	2014-12-01	-1.3125	72.125	99.9554	0.68869	0.0126803	0.00406242	0.0123655	0.00307885	0.027029	0	1.31369	0.363271	0.580589	2.79019	2.83092
508	2014-12-04	-3.29545	74.8182	100.019	1.31983	0.217929	0	0.0343655	0.00507885	0.039029	0	1.67769	2.52827	1.36546	3.37748	3.41692
509	2014-12-07	-3.51667	72.5833	100.875	0.696221	0.0586565	0	0.0153655	0.00107884	0.016029	0	0.690694	0.357271	0.501105	3.07488	3.10957
510	2014-12-10	-2.31667	82.7083	98.9696	0.807801	0	0.0100624	0.0343655	0.00207885	0.023029	0	2.42569	0.536271	1.08991	3.11646	3.1508
511	2014-12-16	3.53333	99	97.9925	0.517867	0.13125	0.0220624	0.0503655	0.00107884	0.065029	0.0423638	1.17669	1.53427	0.937492	3.68248	3.80345
512	2014-12-19	-4.30417	84.1667	99.4308	1.00411	0	0	0.0113655	0.00307885	0.035029	0	1.69469	0.328271	0.702879	3.33458	3.36312
513	2014-12-22	-0.342105	80.7368	99.0347	0.934265	0.128642	0.00206243	0.0473655	0.00207885	0.026029	0.00636376	4.08469	2.86727	2.48639	3.12918	3.15933
514	2014-12-25	3.24583	83.9167	98.0867	0.275098	0	0	0.00436554	0	0.014029	0	0.994694	0.479271	0.53033	2.44108	2.46838
515	2014-12-28	1.49583	80.4583	98.8308	0.585448	0	0	0.00836554	0	0.013029	0	0.609694	0.598271	0.440943	2.82222	2.84854
516	2014-12-31	-8.44583	62.875	99.5888	0.314214	0.0766913	0.00506242	0.0163655	0.00907885	0.041029	0.0283638	0.875694	0.896271	0.510363	2.77112	2.94383
517	2015-01-03	-2.2375	93.0417	99.0696	0.815265	0.121674	0	0.0403655	0.00307885	0.00802896	0.0623638	1.34769	3.30127	1.39875	3.49877	3.52639
518	2015-01-06	-11.2083	76.0417	99.2317	0.0992588	0.14591	0.0180624	0.0223655	0.00607885	0	0.0243638	1.39769	2.33227	1.08256	2.04467
519	2015-01-09	-10.2	72	98.4939	0.0785257	0.0540896	0.0340624	0.0193655	0.00707885	0.00602896	0.0223638	0.981694	0.990271	0.575201	2.16877
520	2015-01-12	-3.85417	89.2917	99.7138	0.233174	0.681553	0.0120624	0.0433655	0.00207885	0.011029	0.0253638	1.91769	1.98127	1.31901	2.59006	2.71909
521	2015-01-15	-9.30833	84.2917	98.8504	0.146335	0.915924	0.0520624	0.0733655	0.00807884	0.028029	0.0503638	3.38769	6.68827	3.24278	2.08742	2.62375
522	2015-01-18	2.5	84.25	97.7475	0.724609	0.447086	0	0.0213655	7.88e-05	0.00602896	0.0233638	1.17969	1.34427	0.896105	2.90412	2.92211
523	2015-01-24	-2.82083	94.2917	97.4575	0.0979013	0.218002	0.348062	0.177366	0.0100788	0.068029	0.0423638	2.40669	2.79027	1.93559	3.11783	3.62749
524	2015-01-27	-9.52083	76.25	98.8821	0.295931	0.28622	0.0430624	0.0343655	0.00507885	0.047029	0.0343638	0.502694	1.52427	0.626685	3.10419	3.32414
525	2015-02-11	-4.88333	91.875	98.6204	0.0599387	0.0947545	0.0450624	0.0633655	0.00407885	0.014029	0.0303638	3.04669	4.05327	2.3893	2.79973	3.02098
526	2015-02-14	-11.0417	80.7083	97.82	0.0624669	0	0.120062	0.0173655	0.0290788	0.034029	0.0363638	0.495694	0.743271	0.29546	2.0511
527	2015-02-17	-16.9167	75.5	98.3863	0.332026	0.313671	0.305062	0.105366	0.0390788	0.036029	0.0833638	2.15869	3.22527	1.57498	3.14521
528	2015-02-20	-20.95	67.25	99.6967	0	0	0.126062	0.0153655	0.0120788	0.015029	0.109364	0.256694	0.196271	0.0997176	0.949234
529	2015-02-23	-19.8292	70.2917	100.38	0.331746	0.0695138	0.124062	0.0333655	0.0360788	0.041029	0.0433638	1.41069	0.506271	0.562782	3.51032
530	2015-02-26	-14.6667	72.0833	99.1475	0.104244	0.16557	0.174062	0.0553655	0.0270788	0.027029	0.124364	1.20769	0.877271	0.626911	2.09075
531	2015-03-01	-8.83333	89.2083	99.8563	0.0715239	0.304552	0.0780624	0.0733655	0.0120788	0.020029	0.0573638	4.29269	4.31527	2.90481	2.5939	3.09805
532	2015-03-04	-1.3125	72.125	98.3542	0.0482153	0.12642	0.0680624	0.0743655	0.0110788	0.029029	0.0413638	2.91269	3.68327	2.16536	2.25193	2.46014
533	2015-03-07	-3.76667	80.375	98.9033	0.108184	0.709304	0.0630624	0.100366	0.0130788	0.043029	0.0483638	3.08369	7.28827	3.24659	2.1143	2.46156
534	2015-03-10	0.1625	87.1667	98.9367	0.104882	0.308707	0.122062	0.144366	0.0130788	0.063029	0.0753638	3.57169	7.96527	3.65604	2.40006	2.7864
535	2015-03-25	1.275	87.1667	98.767	1.52012	0.347277	0.0730624	0.0773655	0.0160788	0.030029	0	2.23769	3.84227	1.93872	3.36768	3.43513
536	2015-03-28	-7.6125	58.75	99.3317	0.626211	0	0.0410624	0.0193655	0.00907885	0.015029	0	0.642694	0.181271	0.268589	2.96218
537	2015-03-31	0.920833	79.2917	98.3	1.08855	0.0209905	0.0140624	0.0323655	0.00407885	0.018029	0.00436376	0.854694	0.440271	0.435105	3.01649	3.06842
538	2015-04-03	8.0125	91.4583	98.1612	0.899097	0.0589735	0.160062	0.0803655	0.00507885	0.00902896	0.174364	1.02769	1.96527	0.953782	2.91266	3.06253
539	2015-04-06	3.99583	80.25	99.2	1.1996	0.0983369	0.0460624	0.168366	0.00507885	0.017029	0.0723638	1.73369	4.51827	2.01714	3.03629	3.10639
540	2015-04-09	5.59167	99.875	98.485	0.55653	0.259531	0.0580624	0.0403655	0.00207885	0.00502896	0.0893638	0.630694	0.860271	0.504782	4.37622	4.49034
541	2015-04-15	8.4625	49.9583	99.8767	1.46787	0.252605	0.0390624	0.0293655	0.0120788	0.057029	0.0343638	0.441694	0.540271	0.274234	2.32985
542	2015-04-18	13.0125	55.1667	98.9342	4.41586	0.0515443	0.0290624	0.0343655	0.00907885	0.055029	0.0323638	1.66569	2.72127	1.3713	2.71274
543	2015-04-21	7.28333	69.9167	97.4038	1.37793	0.00949837	0.0140624	0.00536554	0.00607885	0.025029	0.0223638	1.02569	1.26827	0.70075	2.6695	2.71237
544	2015-04-24	1.15833	65.25	98.8271	4.56703	0	0.107062	0.0263655	0.00807884	0.029029	0.130364	0.608694	0.427271	0.321847	3.44845	3.62491
545	2015-04-27	6.2	73.5833	98.4504	6.57057	0	0.0580624	0.0133655	0.00507885	0.022029	0.0633638	0.382694	0.215271	0.206718	3.38836	3.56052
546	2015-04-30	9.6625	78.4167	98.1533	7.87976	0.0922122	0.0420624	0.0353655	0.00907885	0.041029	0.0333638	1.04769	1.63927	0.84233	3.43567	3.48658
547	2015-05-03	15.5857	54.5417	98.9042	5.03968	0.0712399	0.0240624	0.0383655	0.0120788	0.058029	0.0113638	3.09569	1.68927	1.55352	2.49936
548	2015-05-06	15.7417	66.4583	99.52	6.37468	0.11585	0.0270624	0.0273655	0.0110788	0.026029	0.0173638	1.54569	2.58727	1.33478	2.84292	2.87883
549	2015-05-09	22.4125	61	98.9342	5.56985	0.387367	0.0780624	0.0613655	0.0180788	0.090029	0.0493638	4.04469	1.66027	1.78314	2.20915	2.26542
550	2015-05-15	12.8667	71	99.1292	5.18927	0.384934	0.0380624	0.0533655	0.0150788	0.109029	0.0133638	1.92569	1.52627	1.02588	2.90641	2.98099
551	2015-05-18	21.7696	80.3478	98.7848	4.00618	0.169664	0.0780624	0.0473655	0.0180788	0.132029	0.0433638	2.53369	0.366271	0.843943	2.33965	2.44062
552	2015-06-17	17.9	74.125	99.0962	1.73571	0.0653876	0.0180624	0.0283655	0.00907885	0.061029	0.0133638	1.47369	0.207271	0.572524	2.07455	2.14655
553	2015-06-20	17.5458	83.3333	98.5254	2.64512	0.431324	0.0280624	0.0333655	0.00607885	0.011029	0.00536376	2.88269	0.726271	1.08204	2.46663	2.49074
554	2015-06-23	19.8083	78.8333	98.3179	1.9323	0.121596	0.00906243	0.00936554	0.00707885	0.025029	0.00436376	0.893694	0.131271	0.345363	2.10103	2.14752
555	2015-06-26	18.3833	67.0417	98.93	1.79549	0.7312	0.00406242	0.0263655	0.0110788	0.069029	0	0.930694	0.934271	0.570072	2.02877	2.1404
556	2015-06-29	16.8625	75.2083	98.3892	1.36606	0.345581	0.0130624	0.0373655	0.00807884	0.014029	0	1.11869	0.198271	0.424685	2.04529	2.09544
557	2015-07-02	16.35	73.375	98.6762	0.916949	0.176518	0.00906243	0.0363655	0.0110788	0.028029	0	1.05969	0.230271	0.320556	1.82837	1.90524
558	2015-07-05	19.8042	71.3333	99.1383	1.79934	0.255191	0.0100624	0.263366	0.0220788	0.048029	0	2.85569	1.03627	1.19133	1.97785	2.07779
559	2015-07-08	16.4417	72.4167	98.9963	2.13232	0.066449	0.00606242	0.0843655	0.00907885	0.037029	0	1.01769	0.106271	0.363072	2.2048	2.29665
560	2015-07-14	20.9333	89.4583	97.2992	1.65095	0.477409	0.00706242	0.0243655	0.00607885	0.00902896	0.00436376	1.62069	0.440271	0.675201	2.26773	2.29345
561	2015-07-17	20.2583	83.9583	98.4204	2.00153	0.409085	0.0280624	0.0523655	0.00707885	0.027029	0.0113638	2.20169	0.303271	0.731847	2.18564	2.2311
562	2015-07-20	21.425	72.5417	98.0283	2.21579	0.269636	0.00806242	0.0133655	0	0.025029	0.00136376	1.21669	0.244271	0.432395	1.96665	1.99226
563	2015-07-23	19.225	65.7917	98.7033	2.86833	0.289696	0.00906243	0.0103655	0.00207885	0.075029	0.00436376	0.438694	0.184271	0.179427	2.10643	2.32814
564	2015-07-26	22.9042	69.5417	98.6025	2.37062	0.336631	0.00906243	0.0123655	0	0.047029	0.00536376	1.21769	0.386271	0.450201	1.88112	1.92272
565	2015-07-29	24.5792	67.375	98.5854	2.23925	0.697262	0.0150624	0.0223655	0.0120788	0.104029	0.00336376	3.91169	0.125271	1.16839	1.68994	1.73725
566	2015-08-01	19.675	74.125	98.3483	2.03683	0.198982	0.0110624	0.00936554	0	0.019029	0.00536376	0.663694	0.189271	0.244976	2.04793	2.08698
567	2015-08-04	19.2375	78.7917	98.4208	2.17478	0.25577	0.0140624	0.00736554	0	0.018029	0.00336376	0.712694	0.194271	0.240814	2.17998	2.2181
568	2015-08-07	18.6667	70.2917	98.6608	1.50014	0.308364	0.0200624	0.0103655	0	0.029029	0.000363761	1.29169	0.386271	0.456266	1.90469	1.9427
569	2015-08-10	18.6958	85.9583	98.3579	1.52065	0.50936	0.0130624	0.0183655	0	0.037029	0	1.33669	0.735271	0.671492	2.2812	2.32574
570	2015-08-13	18.4083	72.9583	98.9571	2.03209	0.0995763	0.0190624	0.0123655	0.00407885	0.044029	0.0363638	0.567694	0.154271	0.208718	2.09249	2.21103
571	2015-08-22	17.15	77.0833	99.3092	1.82189	0.214494	0.00106243	0.0213655	7.88e-05	0.011029	0.0303638	0.785694	0.216271	0.313427	2.19163	2.21508
572	2015-08-25	16.1958	68.2083	98.5092	2.01847	0.147142	0.0310624	0.0283655	0.00307885	0.056029	0.0553638	1.07569	0.183271	0.437847	2.14771	2.23869
573	2015-08-28	15.1917	80.3333	99.3858	1.5421	0.0507245	0.00106243	0.0163655	0.00207885	0.045029	0.0313638	1.21069	0.293271	0.49033	2.2892	2.33549
574	2015-08-31	21.0042	84.625	98.9233	2.11162	0.544727	0.00506242	0.0603655	0.00607885	0.022029	0.0273638	4.58069	1.17327	1.8312	2.22199	2.24306
575	2015-09-03	22.3783	81.9583	98.6121	2.4098	0.501028	0.0160624	0.0803655	0.00707885	0.028029	0.0273638	4.89369	1.96127	2.2782	2.20295	2.2282
576	2015-09-06	23.6125	77.3333	99.1479	1.85204	0.359482	0.0200624	0.0593655	0.00607885	0.013029	0.0253638	4.18569	0.492271	1.3612	1.81779	1.84015
577	2015-09-09	21.95	73.8333	98.4229	2.98444	0.26602	0.0280624	0.0243655	0.00207885	0.024029	0.0213638	1.71669	0.195271	0.527137	2.07734	2.10889
578	2015-09-12	13.075	83.2083	98.2746	0.871295	0.0180493	0.0130624	0.00836554	0	0.00802896	0.0303638	0.470694	0.162271	0.179169	2.2041	2.24916
579	2015-09-15	16.9042	72.7083	99.7346	1.31267	0.11002	0.109062	0.0263655	0.00407885	0.050029	0.0353638	2.19969	0.322271	0.736814	1.95202	2.05071
580	2015-09-18	19.2292	78.875	98.5496	1.49357	0.716379	0.0100624	0.0363655	0.00407885	0.041029	0.0363638	2.66169	0.655271	0.966492	2.01597	2.05233
581	2015-09-24	17.2167	75.25	99.8512	2.47013	0.611028	0.0260624	0.0473655	0.00807884	0.033029	0.0393638	3.29369	2.70127	1.91436	2.41804	2.44875
582	2015-09-27	16.2783	78.0417	99.5842	1.52869	0.19866	0.110062	0.0223655	0.00907885	0.021029	0.0523638	0.965694	0.347271	0.35575	2.17582	2.33695
583	2015-09-30	13.6048	70.0476	99.0414	1.17889	0.0357617	0.0100624	0.0143655	0.00507885	0.041029	0.0363638	0.499694	0.163271	0.179363	2.06543	2.19324
584	2015-10-03	7.80417	77.5417	99.7592	0.818726	0.0451358	0.0150624	0.0113655	0.00107884	0.020029	0.0383638	0.303694	0.151271	0.133847	2.37881	2.50392
585	2015-10-06	13.1625	89.5417	99.0942	1.67568	0.311839	0.0520624	0.0413655	0.00407885	0.014029	0.0893638	2.49869	4.07527	2.06075	2.80028	2.83362
586	2015-10-09	12.1917	87.375	98.5575	1.30307	0	0.00706242	0.0213655	0.00107884	0.022029	0.0343638	1.64369	1.30727	0.955105	2.65095	2.67722
587	2015-10-12	18.1792	60.75	97.5204	1.15786	0.0294369	0.0120624	0.0293655	0.00307885	0.027029	0.0363638	1.69369	0.295271	0.600847	1.68743	1.72651
588	2015-10-15	8.46667	77.1667	98.4333	1.24927	0.0895877	0	0.0203655	0.00507885	0.041029	0.0273638	0.470694	0.240271	0.199976	2.54114	2.65681
589	2015-10-18	1.82083	78.6667	99.9287	1.11426	0	0.00506242	0.0153655	7.88e-05	0.011029	0.0353638	0.351694	0.191271	0.153395	2.93582	2.98273
590	2015-10-21	14.8042	72.5417	99.3667	2.22666	0.142686	0.0320624	0.0663655	0.00607885	0.053029	0.0403638	1.64769	0.845271	0.794266	2.38358	2.46004
591	2015-10-24	11.2625	86.5417	98.6475	1.64253	0.112614	0.0210624	0.0363655	0.00207885	0.016029	0.0373638	1.22369	0.584271	0.563492	2.72768	2.77064
592	2015-10-30	5.5375	79.7083	98.8696	0.844338	0	0.00306243	0.0133655	0.00107884	0.026029	0.0383638	0.473694	0.281271	0.22604	2.60454	2.67311
593	2015-11-02	7.89167	81.875	98.9583	0.827297	0.0190388	0.0100624	0.0213655	7.88e-05	0.019029	0.0373638	0.598694	0.499271	0.351137	2.54965	2.60774
594	2015-11-05	16.075	83.2917	99.0317	1.21606	0.231628	0.0130624	0.0373655	0.00207885	0.028029	0.0303638	1.40369	1.29927	0.86204	2.32135	2.36686
595	2015-11-08	3.25	77.9583	99.9917	1.09153	0	0.00106243	0.0293655	7.88e-05	0.019029	0.0283638	0.716694	0.467271	0.361427	2.85526	2.89604
596	2015-11-11	7.99167	86.9583	98.5863	0.6562	0.141343	0.0180624	0.0603655	0.00407885	0.025029	0.0443638	1.75469	7.31727	2.67146	2.65808	2.70433
597	2015-11-14	2.60417	77.3333	99.3462	0.57267	0	0	0.0103655	7.88e-05	0.021029	0.0253638	0.391694	0.186271	0.159008	2.53544	2.59431
598	2015-11-17	7.09167	72.625	99.665	2.00774	0	0.0330624	0.0393655	0.00507885	0.038029	0.0283638	0.455694	0.957271	0.381847	2.90974	3.02461
599	2015-11-20	2.76957	53.6522	99.2422	0.563565	0.168934	0.0120624	0.0153655	0.00307885	0.038029	0.0343638	0.246694	0.391271	0.141911	2.30084
600	2015-11-23	-2.50833	81.7917	99.1012	0.584069	0.0859967	0.0100624	0.0213655	0.00107884	0.00902896	0.0293638	0.459694	1.10127	0.478008	3.10851	3.15151
601	2015-11-26	11.7917	56.4167	100.15	0.467354	0.171078	0.0350624	0.0303655	0.00407885	0.019029	0.0293638	0.906694	0.393271	0.375427	1.62903
602	2015-11-29	-2.89545	91.3182	99.9014	0.37811	0.434246	0.0160624	0.0413655	0.00307885	2.9e-05	0.0483638	1.37569	2.19027	1.12723	2.99557	3.06217
603	2015-12-02	3.00417	91.4167	98.1038	0.705427	0.00289288	0	0.0293655	0.00507885	0	0	1.15169	3.46227	1.38462	3.08782	3.10828
604	2015-12-05	1.3125	93.7083	100.862	0.227241	0.0856316	0.0300624	0.0453655	0.00307885	0	0.0603638	2.27469	5.72027	2.44581	2.70454	2.79862
605	2015-12-08	2.56957	95.8696	98.9009	0.272788	0.126562	0.0270624	0.0623655	0.00407885	0	0.0593638	3.47069	5.61927	2.73491	2.53152	2.66859
606	2015-12-11	8.94583	77.3333	98.0142	0.719048	0.00443694	0.0100624	0.0353655	0.00107884	0.015029	0.0343638	1.48469	1.69927	1.06088	2.46571	2.49885
607	2015-12-17	5.82917	76.7917	97.8658	0.511515	0	0.00606242	0.0153655	7.88e-05	0.013029	0.0293638	1.26169	0.787271	0.643911	2.37131	2.4018
608	2015-12-20	-0.441667	67.625	99.7517	0.645516	0.308176	0.0120624	0.0233655	0.00207885	0.013029	0.0253638	0.582694	1.08227	0.492298	2.78149	2.83749
609	2015-12-23	12.5059	87.9412	97.7947	0.98811	0	0.0130624	0.0133655	7.88e-05	0.012029	0.0313638	0.763694	1.08527	0.568556	2.57018	2.60313
610	2015-12-26	2.025	88.5	99.8104	0.560259	0.199312	0.0150624	0.0303655	7.88e-05	0.012029	0.0693638	0.733694	1.71627	0.77875	2.9513	2.99642
611	2015-12-29	2.51739	91.5652	98.3504	0.312486	0.0746834	0.00606242	0.00736554	0	0.00202896	0.0403638	0.427694	1.17827	0.484492	2.78419	2.80551
612	2016-01-01	-2.17083	74.7917	98.8854	0.101794	0	0.0150624	0.0283655	0.00507885	0.023029	0.00836376	2.00769	2.75027	1.42875	2.21293	2.3196
613	2016-01-04	-11.0708	65.2083	99.8779	0.125094	0.0177314	0.234062	0.0223655	0.0390788	0.035029	0.244364	0.427694	0.377271	0.132137	2.05155
614	2016-01-13	-9.4125	74.5833	98.5671	0.146184	0	0.0240624	0.0223655	0.00407885	0.011029	0.00736376	0.765694	1.12427	0.574427	2.75128	2.90596
615	2016-01-16	-0.55	82.7917	97.4142	0.227469	0	0.00206243	0.0123655	0.00307885	0.00902896	0	0.891694	0.564271	0.498621	2.56287	2.60551
616	2016-01-19	-9.3375	75.8333	99.6008	0.43717	0	0.0410624	0.0163655	0.00607885	0.023029	0.0113638	0.393694	0.381271	0.220266	3.23982	3.38618
617	2016-01-22	-7.05	76.875	99.6042	0.366391	0.25885	0.0380624	0.0163655	0.00507885	0.013029	0.0383638	0.607694	1.79327	0.713524	3.03699	3.14618
618	2016-01-25	1.10417	67.75	98.7579	0.339524	0.278738	0.0530624	0.0443655	0.00607885	0.023029	0.0173638	1.62469	2.23427	1.15514	2.3652	2.48291
619	2016-01-28	-0.470833	82.9583	97.6158	0.245617	0.00153814	0.00906243	0.0333655	0.00407885	0.012029	0.0113638	1.54069	3.43927	1.46504	2.56071	2.62728
620	2016-01-31	6.68333	82.6667	97.6088	0.938237	0.458039	0.0360624	0.0583655	0.00507885	0.016029	0.000363761	1.25569	1.02427	0.74233	2.69315	2.75891
621	2016-02-03	7.9125	78.2917	97.575	0.257925	0	0.0130624	0.0143655	0.00607885	0.015029	0	0.864694	0.583271	0.475395	2.05231	2.12518
622	2016-02-06	0.316667	72.9167	99.4004	0.0390097	0.0691346	0.0220624	0.0213655	0.00707885	0.012029	0.0233638	1.31869	4.47227	1.61952	2.1313	2.19021
623	2016-02-09	-0.704167	96.0833	97.1104	0.1488	0	0.00306243	0.0163655	0.00507885	0.00502896	0	1.10269	1.26327	0.726814	2.75405	2.83201
624	2016-02-12	-9.55417	75.3333	98.7446	0.232018	0.132278	0.0210624	0.0183655	0.00507885	0.00402896	0	0.605694	1.11327	0.497782	2.9047	3.01894
625	2016-02-15	-6.68333	88.5833	98.8496	0.691317	0.270302	0.0340624	0.0453655	0.00607885	0.00902896	0.0173638	2.19369	1.18627	1.02785	3.37588	3.44431
626	2016-02-18	-10.8417	78.2917	100.376	0.26376	0.0854683	0.0840624	0.0323655	0.00807884	0.013029	0.0423638	0.758694	1.06127	0.476169	2.95312
627	2016-02-24	0.65	97.5833	97.3612	0.12714	0.343455	0.0410624	0.0183655	0.00707885	0.018029	0.0503638	0.407694	1.12527	0.450137	2.43562	2.81347
628	2016-02-27	0.266667	71.875	98.5058	0.478999	0.106081	0.0170624	0.0223655	0.00607885	0.015029	0	1.20869	2.19627	0.983589	2.63751	2.69555
629	2016-03-01	-4.65833	75.5833	98.2804	0.364351	0	0.0530624	0.0143655	0.00707885	0.00902896	0.0103638	0.296694	0.165271	0.10833	2.76707	2.98042
630	2016-03-04	-4.17917	79	99.1971	0.228364	0.0686997	0.0440624	0.0323655	0.00607885	0.00702896	0.0203638	0.893694	3.22627	1.11781	2.53033	2.68712
631	2016-03-07	6.59583	70.6667	98.7579	0.411127	0.077262	0.0780624	0.0373655	0.00807884	0.016029	0.0893638	2.22569	1.49327	1.18265	2.20708	2.30577
632	2016-03-10	10.8458	95.6667	98.6737	0.99234	0.0757732	0.0140624	0.0303655	0.00507885	0.010029	0.00336376	0.965694	0.755271	0.574814	2.97057	3.0177
633	2016-03-13	5.86667	80.3333	98.7404	1.1213	0.0323276	0.0340624	0.0493655	0.00707885	0.012029	0.0153638	0.869694	1.83027	0.803492	2.85746	2.91579
634	2016-03-16	8.92273	74.9091	97.765	0.634709	0	0.00906243	0.0103655	0.00707885	0.00602896	0	0.682694	0.941271	0.502685	2.32571	2.37119
635	2016-04-21	11.4625	62.4167	98.5692	3.65511	0.39908	0.0310624	0.0373655	0.0180788	0.125029	0	1.12069	0.932271	0.563072	2.71927	2.87016
636	2016-04-24	7.15417	57.1667	99.1	4.98042	0.187646	0.0600624	0.0433655	0.0150788	0.078029	0	1.43569	1.81027	0.903008	3.08988
637	2016-04-27	6.54583	59.25	98.6658	3.21873	0.179187	0.0520624	0.0293655	0.0130788	0.034029	0	0.891694	1.50027	0.672201	2.98471
638	2016-04-30	8.3	66.7083	99.1983	3.7506	0.911619	0.0370624	0.0383655	0.0100788	0.030029	0	0.628694	2.25827	0.822234	3.08883	3.14239
639	2016-05-03	8.32917	78.9167	98.3479	1.41039	0	0.0190624	0.0193655	0.00807884	0.016029	0	0.795694	1.68627	0.75933	2.80128	2.84375
640	2016-05-06	14.4333	48.25	98.2396	3.07548	0.560535	0.0350624	0.0203655	0.0160788	0.066029	0.0163638	0.971694	0.329271	0.41933	2.23059
641	2016-05-09	9.32083	54.1667	99.0129	2.35753	0	0.0500624	0.0213655	0.0150788	0.107029	0.0433638	0.675694	0.450271	0.323298	2.47245
642	2016-05-15	4.52083	59.875	98.5613	1.58691	0	0.0130624	0.00636554	0.00607885	0.010029	0	0.199694	0.057271	0.0908143	2.58608
643	2016-05-18	11.2083	55.6667	99.3729	1.83556	0.218345	0.0300624	0.0203655	0.0130788	0.067029	0	0.801694	0.257271	0.304814	2.23575
644	2016-05-21	15.8708	52.875	98.8292	2.23392	0.356817	0.0480624	0.0973655	0.0190788	0.080029	0.0293638	1.08269	0.270271	0.373266	2.02035
645	2016-05-27	23	66.125	98.7421	3.52958	0.486448	0.0340624	0.0403655	0.0270788	0.425029	0	1.96669	0.541271	0.675556	2.00085	2.36332
646	2016-05-30	22.0125	59.375	98.6667	4.20185	0.393148	0.0310624	0.0253655	0.0160788	0.238029	0	0.813694	0.205271	0.296976	2.04839
647	2016-06-02	20.3208	70.3333	98.6458	4.41245	0.55302	0.0210624	0.0253655	0.0140788	0.097029	0	1.70869	0.890271	0.791621	2.34036	2.4225
648	2016-06-05	18.6417	84.4167	97.4042	2.75905	0.653879	0.0310624	0.0413655	0.00807884	0.033029	0.0103638	1.61269	0.808271	0.742847	2.50085	2.55463
649	2016-06-08	11.2583	65.9583	98.2687	2.82391	0.275734	0.0130624	0.00836554	0.00607885	0.019029	0	0.261694	0.170271	0.13404	2.58947	2.75114
650	2016-06-11	25.3583	54.875	98.2233	6.57117	0.403216	0.0310624	0.0423655	0.0150788	0.068029	0.00536376	1.41569	0.451271	0.517524	2.02805
651	2016-06-14	15.625	57.2083	98.8567	2.16352	0.208815	0.0440624	0.0403655	0.0120788	0.075029	0.0263638	0.975694	0.238271	0.348105	2.06515
652	2016-06-17	22.0458	45.875	98.775	3.60491	0.517724	0.0350624	0.0303655	0.0160788	0.060029	0.00636376	0.363694	0.102271	0.143234	1.84352
653	2016-06-20	25.175	58.2083	98.7767	4.42589	0.609613	0.0520624	0.0493655	0.0180788	0.079029	0.0193638	2.10769	0.344271	0.698976	1.89229
654	2016-06-23	18.4375	56.9167	98.4683	2.66644	0.317135	0.0200624	0.0263655	0.0120788	0.045029	0	0.291694	0.188271	0.133105	2.0111
655	2016-06-26	24.075	63.4583	98.9225	2.96816	0.570548	0.0240624	0.0543655	0.0130788	0.078029	0	3.49769	0.224271	1.11462	1.8144	1.86017
656	2016-06-29	17.6125	53.0417	98.8417	3.13334	0.158647	0.0400624	0.0203655	0.0180788	0.114029	0.0143638	0.375694	0.087271	0.132008	2.07386
657	2016-07-02	17.8542	59.875	99.1029	2.82343	0.279841	0.0240624	0.0293655	0.00807884	0.027029	0	0.378694	0.082271	0.124201	2.09197
658	2016-07-05	24.025	60.7083	98.2917	4.06565	0.449218	0.0220624	0.175366	0.0280788	0.088029	0	2.29969	0.313271	0.718137	1.93372	2.03826
659	2016-07-08	23.6042	76.5833	98.0621	3.41693	0.356897	0.0260624	0.0323655	0.0130788	0.040029	0	1.96569	0.557271	0.681621	2.11307	2.15855
660	2016-07-11	22.2833	62.2917	99.0267	2.72176	0.248414	0.0290624	0.0253655	0.0120788	0.056029	0	1.44369	0.287271	0.488814	1.8703	1.9428
661	2016-07-14	23.4292	78.4167	98.1513	2.59031	0.399738	0.0400624	0.0273655	0.0120788	0.037029	0.0163638	1.36569	0.207271	0.42746	2.02299	2.09362
662	2016-07-17	19.9458	64.5833	99.1242	3.03385	0.489702	0.0170624	0.0243655	0.0100788	0.060029	0	1.06469	0.264271	0.380718	2.07677	2.16528
663	2016-07-20	18.9917	60.4583	99.5554	2.02373	0.481769	0.0150624	0.0203655	0.0180788	0.124029	0	0.996694	0.084271	0.307589	1.88336	2.08106
664	2016-07-23	24.8917	61.375	98.6454	3.91161	0.486967	0.00806242	0.0213655	0.0180788	0.128029	0	0.887694	0.412271	0.339911	1.89741	2.10715
665	2016-07-26	22.0167	72.2083	98.8004	3.79464	0.368734	0.0130624	0.0123655	0.0100788	0.053029	0	0.241694	0.049271	0.0870402	2.17045	2.78177
666	2016-07-29	22.3	72.75	98.635	2.86437	0.33321	0.0100624	0.0183655	0.0110788	0.047029	0	0.601694	0.168271	0.230105	2.04235	2.16818
667	2016-08-01	21.6042	77.6667	99.0021	1.77382	0.243447	0.00306243	0.00736554	0.00507885	0.024029	0	0.440694	0.262271	0.225395	1.96379	2.03622
668	2016-08-04	23.6417	70.9583	98.8787	1.7382	0.756822	0.0380624	0.0173655	0.0160788	0.110029	0.00836376	2.77369	0.235271	0.923137	1.70561	1.78442
669	2016-08-07	20.9667	61.4583	98.7675	2.58088	0.593131	0.0470624	0.0143655	0.00507885	0.021029	0.0293638	0.339694	0.041271	0.104395	1.9097	2.16492
670	2016-08-10	25.9583	68.875	99.0196	2.18447	0.636997	0.0170624	0.0183655	0.0140788	0.099029	0.00536376	2.76369	0.238271	0.886427	1.65867	1.71581
671	2016-08-13	26.025	84.5417	98.1725	2.47138	0.562405	0.0300624	0.0113655	0.00807884	0.029029	0.00536376	1.25769	0.133271	0.374782	2.00034	2.05491
672	2016-08-16	22.3792	86.625	98.7896	2.11449	0.555479	0.0150624	0.00936554	0.00407885	0.00702896	0	0.659694	0.180271	0.226847	2.19101	2.23301
673	2016-08-19	22.8167	76.2083	98.6158	2.07387	0.697634	0.00906243	0.0163655	0.00707885	0.051029	0	1.57269	0.253271	0.553105	1.92654	1.97322
674	2016-08-22	17.875	70.2083	99.2308	1.96622	0.394295	0.00606242	0.00436554	0.00607885	0.041029	0	0.321694	0.052271	0.117072	2.06989	2.25146
675	2016-08-25	24.0917	84.4583	98.6375	2.5976	0.590884	0.0240624	0.0163655	0.00707885	0.070029	0.00636376	1.79069	0.331271	0.634524	2.13151	2.19328
676	2016-08-28	22.9292	81.2083	99.3088	2.99504	0.422251	0.0330624	0.0423655	0.00907885	0.064029	0.0203638	1.86569	0.250271	0.590169	2.1672	2.23359
677	2016-08-31	21.8917	74.5833	98.6496	3.0091	1.08643	0.0410624	0.0223655	0.00907885	0.051029	0.0273638	1.09569	0.502271	0.429266	2.1348	2.23046
678	2016-09-03	16.0625	68.2083	99.5563	1.42195	0.331661	0.0450624	0.0343655	0.00607885	0.023029	0.0233638	0.494694	0.186271	0.177589	1.99591	2.18884
679	2016-09-06	23.1	76.4167	99.105	2.44279	0.849296	0.0270624	0.0343655	0.0110788	0.112029	0.00536376	2.15969	0.312271	0.738234	1.98395	2.0667
680	2016-09-09	23.2917	72.2083	98.6396	4.42841	0.394235	0.0650624	0.0393655	0.0110788	0.120029	0.0693638	1.16169	0.411271	0.438363	3.06706	2.37113
681	2016-09-15	14.4917	73.5	99.7017	1.42701	0.0864681	0.165062	0.0173655	0.00407885	0.010029	0.0973638	0.586694	0.153271	0.227105	2.15991	2.5657
682	2016-09-18	20.2167	81.4167	98.6688	2.17323	0.494086	0.0460624	0.0203655	0.00707885	0.040029	0.0413638	1.09969	0.321271	0.408524	2.19242	2.28188
683	2016-09-21	17.4625	66	99.4392	1.7196	0.206392	0.0300624	0.0193655	0.00607885	0.073029	0.0313638	0.407694	0.235271	0.174879	1.9799	2.3845
684	2016-09-24	12.5125	67.75	99.5283	0.762726	0	0.0320624	0.0253655	0.00207885	0.051029	0.0303638	0.470694	0.216271	0.199589	1.91783	2.15931
685	2016-09-27	14.5833	56.9583	98.1354	1.41058	0	0.0260624	0.0163655	0.00807884	0.077029	0.0253638	0.396694	0.128271	0.145685	1.9256
686	2016-09-30	14.2	80.9167	99.4971	1.21778	0.00802236	0.0320624	0.0193655	0.00307885	0.016029	0.0223638	0.290694	0.187271	0.145008	2.25118	2.47013
687	2016-10-03	13.9125	88.125	99.0404	1.82628	0.083834	0.0230624	0.0193655	0.00107884	0.032029	0.0383638	0.896694	1.32327	0.677814	2.75291	2.8018
688	2016-10-06	18.4167	75.125	99.4621	0.787677	0.115558	0.0640624	0.0253655	0.00807884	0.053029	0.0323638	1.82169	0.487271	0.736814	1.74829	1.85201
689	2016-10-09	7.51667	74.6667	99.7438	1.41866	0	0	0.0163655	7.88e-05	0.022029	0	0.805694	0.269271	0.34046	2.59751	2.63129
690	2016-10-12	15.4043	69.8696	99.0209	1.04284	0.04496	0	0.0323655	0.00307885	0.040029	0	1.08369	0.282271	0.404169	1.91581	1.97516
691	2016-10-15	12.35	79.2083	99.2758	0.793183	0.0625782	0	0.0293655	0.00107884	0.018029	0	1.32869	0.316271	0.535266	2.60249	2.16927
692	2016-10-18	20.975	70.625	97.7696	2.17208	0.048941	0.0620624	0.0313655	0.00907885	0.044029	0.00536376	1.36869	0.185271	0.464556	1.94456	2.03475
693	2016-10-21	8.775	85.5833	98.435	0.810787	0	0	0.00936554	0	0.00802896	0	0.259694	0.110271	0.129492	2.49182	2.5328
694	2016-10-24	7.70833	74.4167	99.1658	1.75182	0	0	0.00736554	0.00107884	0.024029	0	0.365694	0.179271	0.183169	2.67815	2.74314
695	2016-10-27	2.6	94.4167	98.9721	0.578264	0.0247045	0.00306243	0.0113655	7.88e-05	2.9e-05	0.00536376	0.288694	0.373271	0.225879	3.15559	3.17716
696	2016-10-30	6.8875	88.2917	98.9167	1.40522	0.00482515	0.00106243	0.0123655	0	2.9e-05	0.00436376	0.629694	0.190271	0.30433	2.94425	2.95518
697	2016-11-02	15.6167	86.4583	99.1533	2.56435	0.480867	0.0400624	0.0843655	0.00607885	0.059029	0.0283638	2.07569	2.62727	1.55259	2.76434	2.81818
698	2016-11-05	8.80833	80.9167	99.5696	1.96277	0.210546	0.0110624	0.0423655	0.00407885	0.023029	0.0133638	0.675694	2.77627	1.06446	2.98042	3.01529
699	2016-11-08	8.27917	88.3333	99.035	1.44852	0.112633	0.0210624	0.0693655	0.00207885	0.015029	0.0173638	0.974694	2.24727	1.02817	3.00836	3.05263
700	2016-11-11	6.05	62.7917	98.9692	1.32109	0	0.0250624	0.0313655	0.00507885	0.026029	0.0223638	0.842694	0.139271	0.34604	2.45966
701	2016-11-14	7.95833	66.8333	98.6196	2.16616	0.0909286	0.0270624	0.0583655	0.00507885	0.042029	0.0133638	0.813694	1.61427	0.728266	2.83368	2.91356
702	2016-11-17	2.88421	91.8947	98.9284	1.60414	0.133033	0.0100624	0.0393655	7.88e-05	0.011029	0.0113638	0.791694	1.81627	0.812943	3.46965	3.49788
703	2016-11-23	-3.01765	92.1176	99.6365	0.895823	0.120379	0.0210624	0.0433655	0.00407885	0.010029	0.0373638	0.674694	2.64827	0.968589	3.57663	3.62428
704	2016-11-26	3.29167	89.125	99.3379	0.512844	0	6.24e-05	0.0163655	0	0	0.00436376	0.702694	0.934271	0.538137	2.85884	2.87267
705	2016-11-29	9.325	82.8333	97.7129	0.5989	0.0909244	0.0140624	0.0373655	0.00107884	0.00402896	0.00736376	1.01369	0.549271	0.52946	2.34596	2.38963
706	2016-12-02	3.425	80.2917	98.5721	0.643068	0	0.0280624	0.0363655	0.0100788	0.032029	0.0313638	0.306694	0.333271	0.183234	2.67745	2.93286
707	2016-12-05	2.12917	84.6667	98.6346	0.588775	0	0.0170624	0.0363655	0.0190788	0.062029	0.0233638	1.16269	1.62827	0.79975	2.80602	2.92872
708	2016-12-08	-1.74167	71	98.7583	0.229038	0.0697792	0.0220624	0.0223655	0.00707885	0.021029	0.0123638	0.967694	1.68727	0.782814	2.46798	2.57408
709	2016-12-11	-3.85	92.5417	99.3767	0.250965	0.13079	0.0110624	0.0313655	0.00107884	0.00102896	0.00736376	1.31269	2.88827	1.36198	3.1177	3.16622
710	2016-12-14	-9.09583	67.9583	98.7229	0.229874	0.17219	0.0260624	0.0223655	0.00107884	0.00602896	0	0.789694	1.20027	0.580105	2.70868	2.84111
711	2016-12-17	-2.25833	95.0833	97.8167	0.223064	0.045915	0.0120624	0.0383655	7.88e-05	0.00402896	0.0163638	1.07269	1.62527	0.859072	3.04362
712	2016-12-20	-8.09583	72.5	99.5775	0.00979284	0.121785	0.0170624	0.00636554	0	0.00302896	0.00936376	0.0866944	0.172271	0.0764918	2.03234	2.26731
713	2016-12-23	0.766667	82.6667	99.665	0.382565	0.172096	0.0750624	0.0953655	0.00407885	0.044029	0.0963638	1.00069	5.52927	1.93194	2.75042	2.91337

## Sheet: Windsor
item	Date/Time	Temp (°C)	Rel Hum (%)	Stn Press (kPa)	NH3(g)	HNO3(g)	Na(p)	K(p)	Mg(p)	Ca(p)	Cl(p)	SO4(p)	NO3(p)	NH4(p)	pH_EAIM II	pH_EAIM IV	*All chemical compositions have the unit ug/m3
1	2007-01-03	4.24583	74.4583	99.8258	0.374391	0.0989501	0.0404855	0.0647177	0.0205744	0.0922522	0.122213	2.44744	4.85578	2.1437	2.38251	2.47533
2	2007-01-21	-4.62083	80.7917	99.8458	0.329593	0.89132	0.0341503	0.058025	0.00497848	0.0211533	0.163772	1.72005	2.38357	1.26053	2.37791	2.35167
3	2007-01-24	-3.33333	78.7917	99.3621	0.846464	0.250081	0.0608872	0.088897	0.00641409	0.0367119	0.233823	2.37751	4.2259	2.05837	3.20952	3.22633
4	2007-01-27	1.45833	76.5	98.1617	0.22316	0.255429	0.0443781	0.121124	0.00612277	0.0375309	0.230985	3.72038	8.21605	3.43213	2.09841	2.09011
5	2007-01-30	-5.80417	78	98.9954	0.0589831	0.211773	0.125564	0.0960741	0.017675	0.0641399	0.219055	3.04933	7.86022	3.00493	1.60706	1.69857
6	2007-02-02	-6.52917	67.9583	98.3287	0.0278987	0.194081	0.176299	0.122988	0.0170428	0.0747624	0.403245	4.00653	6.18692	2.88328	1.49776	1.5447
7	2007-02-05	-15.55	55.5417	100.468	0.07051	0.192483	0.0871127	0.0430462	0.0162664	0.0251772	0.183205	0.615165	1.82531	0.732101	2.11094
8	2007-02-14	-10.0375	72.2083	99.435	0.304576	0	0.286753	0.0482862	0.0248802	0.0378537	0.241684	0.98387	0.723485	0.439794	2.85881
9	2007-02-23	-5.94583	58.9583	100.492	0.220962	0.53521	0.0427861	0.0150314	0.00841784	0.040824	0.0338061	0.647489	0.621853	0.392679	2.261
10	2007-02-26	0.829167	87.0833	98.3983	0.219453	0.294567	0.0193562	0.0442891	0.0103743	0.0288966	0.111603	4.22411	3.76824	2.39992	2.02201	2.04209
11	2007-03-31	7.6875	59.3333	99.7429	1.71849	0.537093	0.033073	0.030374	0.00730073	0.0579239	0	1.01453	2.73298	1.18402	2.71066
12	2007-04-03	12.2583	67.4167	98.9283	1.9858	0.188356	0.0519825	0.0343569	0.00791696	0.0632804	0.00144737	2.87081	2.56969	1.77523	2.50634	2.56082
13	2007-04-06	-2.81667	56.0833	98.9379	0.591777	0.245969	0.0423635	0.00950703	0.00924864	0.0565463	0	0.540629	0.224944	0.259914	2.65653
14	2007-04-09	1.87917	60.375	99.5579	0.832727	0.323623	0.072489	0.0268246	0.013011	0.0566386	0.0737699	2.31773	2.22206	1.5006	2.63232	2.72718
15	2007-04-12	5.54167	79	97.8967	0.385314	0.144275	0.0433406	0.0374064	0.0191165	0.0666333	0.017892	2.4073	1.72281	1.2728	2.29678	2.42516
16	2007-04-15	5.34167	60.2083	98.6954	0.599384	0.151205	0.015057	0.0208882	0.00318083	0.0312956	0	2.05957	0.262863	0.860228	2.15977	2.21627
17	2007-04-24	12.5833	63.0833	99.6963	1.44287	0.380723	0.031216	0.0451342	0.0163935	0.0962811	0	1.82719	0.896998	0.905594	2.21039	2.32841
18	2007-04-27	12.0542	85.1667	98.3971	0.507998	0.29548	0.0489023	0.0514818	0.00569159	0.0308723	0	3.2613	1.87134	1.71086	2.2436	2.31073
19	2007-04-30	16.0333	54.3333	99.2129	2.06366	0.463161	0.0189364	0.05184	0.015194	0.0878872	0	1.51725	0.627598	0.684417	2.02995
20	2007-05-03	12.625	57	100.08	2.33926	0.471894	0.0218531	0.0319423	0.011011	0.0717781	0	1.30029	0.904363	0.725795	2.36988
21	2007-05-18	12.975	51.2917	100.184	1.52599	0.777348	0.0127431	0.0431196	0.0146574	0.108569	0	1.30881	1.33758	0.786145	2.13199
22	2007-05-21	11.5333	66.375	99.9979	1.22847	0.499055	0.0114486	0.127348	0.0137123	0.0293128	0	2.71219	1.22984	1.25375	2.23578	2.3056
23	2007-05-24	24.9375	50	100.155	2.03427	1.61564	0.0509416	0.0856564	0.0336272	0.194875	0	15.5943	1.27353	5.73053	1.50094
24	2007-05-27	19.9208	76.1667	99.4663	2.41564	0.289326	0.0439249	0.0689367	0.0153042	0.0499196	0	4.16932	2.46289	2.09696	2.24399	2.28777
25	2007-05-30	24.2583	57.5417	99.8217	2.09334	1.54766	0.0957871	0.0674526	0.0402133	0.21211	0	18.1823	1.09699	5.78844	1.42908
26	2007-06-02	24.3292	69.0833	98.8487	3.46968	0.889475	0.0953912	0.166029	0.0394608	0.196376	0.0300222	10.2427	3.725	4.2332	2.01362	2.08027
27	2007-06-08	25.5292	60.5417	98.6363	3.69605	0.574549	0.0920505	0.14431	0.031068	0.157544	0	4.28449	0.407684	1.34043	1.80151	1.89989
28	2007-06-11	21.8375	54.5417	99.7996	1.96008	1.32099	0.0267538	0.0788624	0.0131496	0.0883378	0	5.25648	0.879697	1.99713	1.6855
29	2007-06-14	24.7667	52.2917	99.5033	2.61082	1.66261	0.0327769	0.0594284	0.0145927	0.0841662	0	3.69978	0.438469	1.35616	1.62983
30	2007-06-17	26.0792	59.625	99.2846	2.09497	1.37157	0.0448083	0.132199	0.0154546	0.0954951	0	7.5343	0.862672	2.83321	1.56314
31	2007-06-20	22.0875	48.125	99.6146	2.1817	1.15571	0.135819	0.0875173	0.0174038	0.119271	0	1.31374	0.371228	0.618315	1.67106
32	2007-06-23	18.4792	51.3333	99.4883	1.10519	0.422574	0.00936094	0.0729288	0.00557229	0.0635553	0	1.42749	0.180408	0.560653	1.57357
33	2007-06-26	27.7125	64.8333	99.8754	2.03204	1.24723	0.0618878	0.0778942	0.0223367	0.152962	0	11.214	1.52171	3.75959	1.45866	1.51666
34	2007-07-02	17.7042	57.2917	100.313	1.18843	0.169317	0.00694639	0.0659156	0.00814287	0.0373381	0	0.869163	0.232443	0.349376	1.70301
35	2007-07-05	23.6458	66.5	98.9938	2.26863	0.582943	0.0159011	1.0953	0.105209	0.0810215	0	3.83658	2.03296	1.2717	1.7604	2.10194
36	2007-07-08	29.0875	53.75	98.6312	2.83517	0.696379	0.0511517	0.245161	0.0338227	0.0788748	0	5.09308	0.579643	1.62401	1.43592
37	2007-07-11	23.95	51.5417	98.7092	1.05977	0.424504	0.0454124	0.152641	0.0705036	0.140009	0	1.22252	0.245745	0.380628	1.24085
38	2007-07-14	21.3042	57	98.6625	1.96922	0.728021	0.051374	0.0900581	0.0182456	0.134204	0	2.07108	0.376427	0.736058	1.72202
39	2007-07-17	21.3583	77.375	99.2754	2.66083	0.477595	0.0944954	0.0640303	0.042491	0.184315	0.0475307	4.44111	1.77159	1.99933	2.19376	2.29595
40	2007-07-29	23.6208	67.7917	99.2488	2.32782	0.932802	0.0101618	0.0484987	0.0101073	0.0591701	0	5.73335	0.380909	1.84274	1.76199	1.78957
41	2007-08-01	27.4583	66.375	99.3433	2.79704	0.0976587	0.0857773	0.0753842	0.0247424	0.142886	0	8.58083	1.37397	3.38533	1.71881	1.77155
42	2007-08-04	23.6583	58.5	99.5738	1.59069	0.748333	0.0307909	0.0882351	0.0109546	0.0614442	0	1.68232	0.349788	0.631942	1.53607
43	2007-08-07	26.1958	81.2917	98.6713	2.02889	0.688822	0.0366664	0.098006	0.0116407	0.0638881	0	5.00194	1.44375	1.94179	1.86677	1.91415
44	2007-08-10	24.0208	75.6667	99.1017	2.05765	0.79202	0.00429439	0.0335834	0.0062038	0.0398748	0	4.12684	1.92116	1.87134	1.92563	1.94631
45	2007-08-13	22.75	59.6667	99.6208	1.84661	0.378124	0	0.01817	0.00555412	0.0399793	0	0.953132	0.134241	0.378518	1.65961
46	2007-08-16	25.7042	69.75	98.9946	1.94422	0.720816	0.0146097	0.0940405	0.0133062	0.0792098	0	4.67841	1.19638	1.74207	1.66489	1.71205
47	2007-08-19	15.9375	83.9583	99.7621	0.944448	0.367986	0.0158941	0.0364734	0.00273105	0.0218937	0	2.0578	0.681872	0.932325	2.16852	2.20761
48	2007-08-22	24.0042	89.7083	99.3779	1.44996	0.57572	0.0141219	0.0666174	0.00881183	0.0577944	0	6.6863	1.55286	2.62103	2.0468	2.08427
49	2007-09-15	11.3708	59.2917	100.088	0.782258	0.0651917	0.00617863	0.051166	0.00569514	0.0369562	0	0.147781	0.163227	0.0558934	1.87405
50	2007-09-18	18.8875	65.6667	100.086	0.492569	0.887528	0.0214681	0.15325	0.0152573	0.0968245	0.0199374	11.5392	0.96142	3.53724	0.940632	1.05938
51	2007-09-21	21.9042	72.4583	99.3917	1.38568	1.0369	0.023527	0.154649	0.0113297	0.0642226	0.017418	14.0931	1.62487	4.40047	1.45642	1.51018
52	2007-09-24	21.725	65.0833	99.7854	1.53453	0.891345	0.039499	0.152615	0.0166821	0.0967457	0.0234063	7.99182	0.819244	2.87303	1.6706	1.73595
53	2007-09-30	18.2667	66.375	100.317	0.81344	0.375713	0.0251932	0.155735	0.00982817	0.0872282	0.0216212	5.84447	0.758692	2.06592	1.56714	1.6643
54	2007-10-03	20.775	69.6667	99.1854	1.42892	0.32963	0.0418312	0.15032	0.02291	0.122751	0.0361071	3.71682	0.620264	1.28955	1.74568	1.85865
55	2007-10-06	24.5667	76.7083	99.6842	1.78589	1.20529	0.0643052	0.159132	0.0115561	0.0558326	0.0198419	7.4295	1.69095	2.92801	1.82059	1.87121
56	2007-10-09	20.4292	57.9167	98.86	1.56223	0.23044	0.0227982	0.122354	0.0131156	0.0843723	0.0229364	2.95703	0.415738	1.01734	1.6603
57	2007-10-12	8.90417	62.7917	99.1779	0.731356	0.0204478	0.0127617	0.121124	0.00989758	0.0861139	0.0466745	0.669055	0.279836	0.288458	2.0498	2.4133
58	2007-10-15	15.1958	76.2083	99.7383	1.61097	0.378601	0.0394309	0.184902	0.011706	0.119424	0.0014945	3.92345	3.19407	2.31846	2.38476	2.47007
59	2007-10-18	20.2125	81.2917	98.1104	1.27886	0.386008	0.0567033	0.179995	0.00765201	0.0818622	0	7.10452	2.45573	3.17794	2.05883	2.12687
60	2007-10-21	19.2333	50.375	99.1567	1.20002	0.575505	0.0254398	0.132654	0.0103384	0.0957005	0	1.67674	0.343039	0.638601	1.55724
61	2007-10-27	11.625	84.2917	99.5987	0.407105	0.117332	0.0257471	0.15033	0.00446666	0.0527313	0.00944378	2.23782	1.06264	1.08206	2.13122	2.26224
62	2007-10-30	10.4	62.6667	100.321	0.718967	0.25203	0.0837289	0.18264	0.0169382	0.149636	0.0350004	3.23625	3.31471	1.88138	2.14242	2.3084
63	2007-11-02	6.075	70.3333	100.26	1.21381	0.192727	0.022862	0.0910025	0.0108066	0.0894774	0.0128538	1.79722	1.96056	1.12678	2.66422	2.76228
64	2007-11-05	7.59583	70	98.4237	1.70685	0.149491	0.0574305	0.136803	0.0319988	0.108653	0.0302665	1.7222	2.41728	1.23627	2.75204	2.88324
65	2007-11-08	4.375	66.0833	99.4988	1.17501	0.223586	0.0166596	0.0748076	0.0137954	0.0971327	0.0496575	2.28428	3.92046	1.83915	2.72178	2.80015
66	2007-11-11	6.025	82.375	99.7704	0.251464	0.131987	0.00787879	0.0751203	0.00332298	0.0280957	0.076026	4.75688	4.58437	3.2117	2.44002	2.46544
67	2007-11-20	11.65	87.7083	99.1692	1.7844	0.222871	0.0194661	0.0920345	0.00528964	0.0337783	0.149643	5.52156	8.44503	4.40073	2.84421	2.85477
68	2007-11-23	-1.9375	56.25	100.432	0.373417	0.129883	0.0177827	0.0402886	0.012696	0.0693979	0.0218944	0.595314	0.659408	0.402376	2.48028
69	2007-11-29	1.1625	56.6667	99.4329	0.618448	0.166203	0.0894906	0.140596	0.0245025	0.168229	0.119676	3.00437	2.46355	1.56028	2.32216
70	2007-12-02	4.08333	94	98.7237	0.288271	0.133005	0.0182858	0.0617501	0.000775686	0.021521	0.0310628	2.32765	3.05082	1.70907	2.6714	2.74696
71	2007-12-05	-4.49583	73.3333	98.8908	0.457902	0.170266	0.0913491	0.0135872	0.00226853	0.0201453	0	0.531264	1.04635	0.435092	2.91957	3.09625
72	2007-12-08	-0.983333	64.5833	100.396	0.146593	0.213825	0.186533	0.0743608	0.00461339	0.0486253	0.203714	2.80599	4.99961	2.35094	2.14663	2.32282
73	2007-12-11	1.26667	94.5417	99.755	0.338755	0.0116942	0.0492195	0.0927806	0.00182718	0.0323889	0.28388	3.12256	5.49033	2.88251	3.15019	3.13579
74	2007-12-14	-0.291667	63.2917	100.142	0.362443	0.102593	0.0826551	0.0726687	0.00759206	0.0839545	0.0353757	3.04186	2.67176	1.70403	2.27282	2.49268
75	2007-12-17	-4.29583	77.75	99.69	0.199938	0.0902795	0.0580719	0.0942413	0.00480354	0.0288738	0	4.47285	3.15517	2.37629	2.14112	2.45393
76	2007-12-20	-1.50417	85.2917	99.9396	0.5136	0.0960516	0.0506243	0.139568	0.00501237	0.0497656	0.260759	3.58563	8.50296	3.514	2.74857	2.78718
77	2007-12-23	2.0625	74.7083	98.1963	0.0651306	0.0234228	0.0182503	0.0268831	0.00401084	0.0387223	0	2.67415	0.557537	0.996874	1.46583	1.6982
78	2007-12-26	-2.02917	91	99.6688	0.229545	0.283832	0.024626	0.129825	0.00111691	0.0345882	0.306061	3.72563	5.59256	3.01144	2.75923	2.6626
79	2007-12-29	0.641667	70.0417	99.3421	0	0.0899701	0.0514089	0.0906263	0.00795267	0.0491328	0	5.16095	1.95569	2.22713	1.54397	1.77558
80	2008-01-01	0.204167	87.125	98.6617	0.128256	0.0101033	0.00744684	0.0491849	0	0.00541202	0	3.34524	2.86305	1.98109	2.29536	2.36459
81	2008-01-19	-7.58333	55.1667	99.5921	0.0842993	0.0765792	0.0959596	0.0322666	0.0145733	0.06356	0	1.32553	1.78056	0.920528	1.9414
82	2008-01-22	-3.21667	70.0417	99.2933	0.025888	0.384718	0.0962377	0.0634164	0.0108612	0.053797	0.19432	2.0193	2.66537	1.38418	1.82613	1.91693
83	2008-01-25	-9.9375	61.0417	100.626	0.157884	0.628943	0.266899	0.0939165	0.0232047	0.1063	0.0378377	2.29048	3.52764	1.61864	1.46038	2.68553
84	2008-01-28	-1.4875	78.8333	99.265	0.14219	0.252757	0.0691533	0.095111	0.00996639	0.0554326	0.168707	3.65468	11.1627	4.51568	2.33179	2.44934
85	2008-01-31	-7.575	64.9583	100.746	0.22947	0.278378	0.433202	0.116455	0.0874023	0.124323	0.462133	1.93613	5.58099	1.82015	1.58875	2.50166
86	2008-02-03	0.179167	78.5417	99.9454	0.102283	0.198859	0.0972426	0.0839282	0.00842475	0.0377499	0.0282747	7.70372	3.46248	3.57723	1.74535	1.95057
87	2008-02-12	-8.7125	78.875	99.4954	0.0139892	0.325605	0.123846	0.0584026	0.00877023	0.0288305	0.0670191	2.5881	3.07562	1.76962	1.72997	2.13003
88	2008-02-15	-2.98333	67.0833	99.9163	0.144311	0.268073	0.137334	0.0514777	0.00874841	0.0439425	0.112853	2.79587	3.18737	2.00602	2.38013	2.59391
89	2008-02-21	-8.175	57.5	100.421	0.3964	0.2871	0.0880479	0.0412397	0.0154361	0.090174	0.0726528	0.884491	1.56428	0.688804	2.73453
90	2008-02-24	-2.4375	76.7917	99.6658	0.370311	0.391999	0.107338	0.144327	0.00998897	0.0504046	0.269954	6.60043	13.5945	6.17855	2.40958	2.52018
91	2008-02-27	-8.85417	62.5	99.015	0.215468	0.209014	0.176075	0.0134476	0.010541	0.0535522	0.0985652	0.475359	0.747642	0.326672	2.55329	3.11069
92	2008-03-01	-1.96667	67	99.6671	0.303294	0.102078	0.113781	0.0442461	0.0112613	0.0361371	0.0393607	2.68688	1.96265	1.50323	2.43967	2.63386
93	2008-03-04	-2.09167	79.0417	99.0354	0.321568	0.332817	0.0294484	0.018399	0.00847291	0.030871	0	0.684291	0.616075	0.427873	2.65762	2.79735
94	2008-08-25	19.1542	64.0417	99.6254	0.990107	0.252416	0	0	0.00337163	0.0133344	0.0218094	0.632867	0.19799	0.243597	1.62189	1.64152
95	2008-08-28	19.0917	86.375	98.9921	0.819423	0.241164	0	0.00489913	0.00070053	0.0116977	0.0140412	6.36869	1.71845	2.68859	2.02094	2.02289
96	2008-08-31	22.7333	62.1667	100.018	2.52463	0.84495	0	0.147965	0.018785	0.114917	0	3.80119	0.904744	1.42463	1.82788	1.89977
97	2008-09-03	24.2417	70.25	99.2629	2.79377	1.75915	0.0174275	0.0574138	0.0310372	0.112475	0	11.7477	1.50752	3.97642	1.82739	1.86538
98	2008-09-12	22.5583	83.1667	99.2521	1.3824	0.243179	0.00432242	0.0348345	0.00764578	0.0802009	0	9.32298	2.23549	3.79728	1.9647	1.99364
99	2008-09-15	16.3167	71.9583	99.3363	1.07656	0.0526553	0	0	0.000310886	0.0252809	0	0.289126	0.114887	0.126383	1.91622	1.98932
100	2008-09-21	18.4333	73.4167	100.314	1.52746	0.253526	0	0.0565575	0.00461774	0.0488015	0	3.70368	0.987962	1.46426	1.9988	2.03195
101	2008-09-24	19.4292	68.8333	100.495	1.02135	0.616757	0	0.120337	0.00943337	0.07514	0	6.24531	1.42886	2.44588	1.72507	1.78179
102	2008-09-27	18.0875	78.9167	99.4846	1.83327	0.380313	0.00509	0.035152	0.00337932	0.0243227	0.00398994	2.27888	0.881563	1.03233	2.22204	2.24686
103	2008-09-30	15.2375	79.7917	98.7158	1.80043	0.283788	0	0.0338568	0.00548168	0.0468171	0.00188187	2.30529	1.08478	1.09617	2.40353	2.43888
104	2008-10-12	18.5208	61.5	100.644	1.23566	0.407105	0.0380028	0.0335325	0.00738168	0.0432795	0	4.28832	1.5298	1.80066	1.78189	1.82437
105	2008-10-15	15.3375	79.5833	99.5187	2.41834	0.207258	0.0510539	0.0353266	0.0142077	0.0948989	0.109189	1.57667	1.85969	0.974703	2.58164	2.65505
106	2008-10-18	9.4375	58.4583	100.392	1.30276	0.290819	0.0215797	0.009039	0.00472858	0.0308429	0	1.20999	0.47945	0.523547	2.25068
107	2008-10-21	6.925	62	100.227	0.60094	0.193914	0.0380456	0	0.00273484	0.0202553	0	0.617331	0.157611	0.270543	2.07796	2.18432
108	2009-04-04	6.3625	52.375	98.9217	0.686737	0.559136	0.0122993	0.0190364	0.00174714	0.0120444	0	0.736526	0.167668	0.324218	2.08825
109	2009-04-07	0.470833	67.0833	98.0596	0.390233	0.664361	0.0653481	0.0579284	0.00432022	0.0379593	0.0029282	1.09785	0.266257	0.460777	2.28745	2.48853
110	2009-04-10	5.92083	56.7917	99.1933	1.18497	0.624751	0.0407753	0.0329118	0.0116871	0.0958372	0.0132127	2.07467	0.877552	0.938327	2.41095
111	2009-04-13	4.04167	55.4167	99.5617	0.888974	0.472249	0.012586	0.0175228	0.0058957	0.0230912	0	2.10722	0.903089	0.970586	2.37385
112	2009-04-19	9.675	71.25	99.1817	2.59137	0.41865	0.0019013	0.0291312	0.00643476	0.0251263	0	1.72588	1.7797	1.17322	2.82315	2.84887
113	2009-04-22	7.0375	61.25	98.4633	0.521085	0.315479	0.000470928	0.0232462	0.00990097	0.035032	0	0.946735	0.189767	0.369758	1.98218	2.07757
114	2009-04-25	23.2042	52.375	99.39	2.69259	0.481241	0.047403	0.0652453	0.0248404	0.127714	0	2.10556	0.466979	0.769935	1.71865
115	2009-04-28	11.25	76.9167	100.409	1.49699	0.260189	0.021191	0.0231658	0.00708998	0.0346233	0	0.839738	0.493973	0.381637	2.48323	2.56756
116	2009-05-01	16.2792	64.625	98.8904	1.28794	0.513309	0	0.0210911	0.0075022	0.0390907	0	1.6417	0.744266	0.771638	1.95062	1.99362
117	2009-05-04	14.5792	45.75	99.5738	1.51276	0.725187	0	0.0332317	0.0105482	0.0545206	0.00462015	2.34372	0.46592	0.922728	1.87056
118	2009-05-13	14.7708	65.9583	99.44	2.08285	0.570411	0	0.0398907	0.00699862	0.0442544	0	3.84864	1.16394	1.76719	2.27626	2.30451
119	2009-05-16	15.9208	66.9583	99.0096	1.50922	0.188723	0.00302665	0.0267548	0.00317879	0.0189861	0	1.38789	1.11945	0.896342	2.12724
120	2009-05-19	18.0958	43.9583	100.335	0.87262	0.73449	0.00529362	0.0285697	0.0223299	0.130699	0	2.68465	0.514388	1.09869	1.46234
121	2009-05-22	17.0583	52.4583	100.025	1.89471	0.632508	0	0.0157475	0.0111683	0.0597953	0	0.778198	0.334882	0.349757	1.90315
122	2009-05-31	13.0042	50	99.1713	0.983578	0.168837	0	0.0108089	0.00670858	0.0342316	0	0.838947	0.269075	0.39851	1.8224
123	2009-06-03	13.5042	66.875	99.6933	1.53424	0.311184	0	0.0182305	0.0113842	0.0602079	0	1.02106	0.93847	0.633652	2.25609	2.34538
124	2009-06-06	15.7792	59.4583	99.2338	1.48273	0.368082	0	0.0337535	0.00792346	0.0430521	0	1.70952	0.607291	0.800054	1.969
125	2009-06-09	19.575	71.5	98.9467	2.31404	0.199303	0	0.0307482	0.015355	0.0892381	0	2.45885	1.47393	1.21084	2.1355	2.19211
126	2009-06-12	17.25	61.5417	99.0946	2.13557	0.427697	0.0131654	0.0162597	0.00408576	0.0323076	0	0.611104	0.232694	0.233499	2.03089	2.11748
127	2009-06-15	19.6792	64.0833	99.5238	1.8236	0.827182	0.0139634	0.0244262	0.00935828	0.0763096	0	4.10704	0.378656	1.43683	1.83898	1.88042
128	2009-06-18	19.3417	76.9167	98.9075	1.77775	0.800413	0.0125148	0.0113265	0.00562292	0.0461471	0.00265318	2.00778	2.5351	1.38708	2.22571	2.26187
129	2009-06-21	20.9167	78.5833	98.8471	1.56365	0.694244	0.0070309	0.0233816	0.00494175	0.0466623	0	1.79672	0.989426	0.888578	2.01201	2.05448
130	2009-06-24	26.35	69.3333	98.9658	1.99035	1.79663	0.0549533	0.083059	0.0238897	0.147108	0.0165976	10.1834	0.575914	3.12297	1.50106	1.56577
131	2009-06-27	21.7625	64.3333	99.0179	1.40504	0.853589	0.0112841	0.283172	0.0182579	0.0350053	0.00169472	1.50095	0.876859	0.62579	1.66626	1.84203
132	2009-06-30	17.8292	76.25	97.8167	1.6639	0.242634	0.00321612	0.015114	0.00728209	0.0474088	0	0.919721	0.340813	0.403078	2.11267	2.1827
133	2009-07-03	19.6333	67.1667	99.34	1.5269	0.45648	0.00796885	0.123667	0.0123888	0.0355771	0.00371483	0.781659	0.263824	0.288334	1.8243	1.9967
134	2009-07-15	23.1292	61.75	99.24	1.69023	0.399044	0.0182517	0.0375838	0.0175761	0.111647	0	2.82814	0.383857	0.99082	1.61042	1.68779
135	2009-07-18	17.8333	67.5	99.0604	1.48625	0.14793	0.00622347	0.0242853	0.00356308	0.0256903	0	0.52642	0.148958	0.233419	1.91807	1.99958
136	2009-07-21	20.625	74.6667	99.6504	1.08394	0.407591	0.0136812	0.0121216	0.00812204	0.0623961	0.0160002	5.24446	0.291758	1.55343	1.57519	1.61441
137	2009-07-30	21.1	60.5833	98.9304	1.908	0.571376	0.0230529	0.0258643	0.0155762	0.083533	0.0176988	1.83343	0.413644	0.736741	1.7775	1.85939
138	2009-08-02	22.2167	54.4167	98.9654	1.49826	0.527291	0.0131701	0.0182092	0.0071612	0.0585707	0.0123215	2.0628	0.39487	0.811381	1.54924
139	2009-08-05	20.4083	60.0833	99.4308	0.883505	0.399504	0.00603288	0	0.0145624	0.104082	0.0145976	0.575928	0.318753	0.30606	1.49877	1.79515
140	2009-08-08	21.0625	82.875	99.5829	2.2559	0.650923	0.0476081	0.0434318	0.0105562	0.0713205	0.0305911	4.02251	0.737296	1.57012	2.20119	2.24833
141	2009-08-11	23.6875	75.0417	99.1421	2.43481	0.699957	0.0236031	0.0211023	0.0123109	0.0689805	0.0169921	2.245	0.657735	0.937072	1.95859	2.01085
142	2009-08-14	23.675	71.3333	99.8583	1.57905	1.0684	0.0298353	0.0430578	0.0143749	0.0921606	0.0184644	6.53521	0.973035	2.03669	1.58944	1.6391
143	2009-08-17	25.3875	76.875	99.5808	1.41919	0.65677	0.0315233	0.02353	0.015453	0.0862524	0.0147737	5.39403	0.485854	1.73765	1.58247	1.63228
144	2009-08-26	18.9417	85.625	99.6192	1.36177	0.479621	0	0.0138072	0.0111521	0.0595508	0	1.6926	0.788613	0.812446	2.20844	2.26568
145	2009-08-29	18.2208	73.3333	98.5487	1.12067	0.259357	0	0.0366752	0.0174779	0.0258919	0	1.83159	1.72171	1.09661	1.99765	2.04343
146	2009-09-04	19.5708	67.4583	99.8246	1.77352	0.915423	0	0.147671	0.0197455	0.0915957	0	6.08174	2.42319	2.75025	1.9918	2.04762
147	2009-09-07	20.5792	84	99.7046	1.99722	0.484548	0	0.0540513	0.0059684	0.0361089	0	4.73096	0.915777	1.96215	2.21984	2.24245
148	2009-09-10	20.9458	76.4167	100.193	1.70472	0.451832	0.00483375	0.0424731	0.00541282	0.0559253	0	3.23925	0.843486	1.2523	1.95699	1.99248
149	2009-09-13	19.6167	69.7083	99.6358	2.4433	0.738941	0	0.0671975	0.00824076	0.0603947	0	2.61865	0.614438	0.992296	2.07712	2.12163
150	2009-09-16	16.3375	66.7083	100.12	1.7517	0.396018	0	0	0.00282891	0.0282762	0	0.749175	0.223162	0.308846	2.06395	2.10145
151	2009-09-19	14.55	66.4167	100.297	2.26357	0.330107	0	0.000702582	0.00389537	0.0302784	0	0.355645	0.216197	0.14847	2.27625	2.36763
152	2009-09-28	13.65	81.9583	97.2771	0.759788	0.121621	0.030573	0.000444929	0.0080153	0.0626372	0	1.96778	0.47676	0.809539	2.11875	2.1982
153	2009-10-01	9.76667	66.125	99.4021	1.32699	0.0944742	0.0519421	0.0116228	0.0224685	0.0971199	0.0182773	0.537626	0.898173	0.319793	2.40551	2.7264
154	2009-10-04	11.2667	83.6667	99.0846	0.640365	0.432249	0.016756	0.0439952	0.00982213	0.0226414	0.0403893	1.42752	0.378827	0.599174	2.21638
155	2009-10-10	9.31667	67.7917	99.625	0.215095	0.126047	0.00708274	0	0.00272114	0.00793617	0.0408701	0.152747	0.177585	0.0713405	1.56015	1.66363
156	2009-10-16	4.42083	67.3333	99.4567	0.838222	0.220693	0.0133263	0.00859867	0.00515652	0.0265342	0.0344002	0.559955	0.380934	0.306908	2.53021	2.60113
157	2009-10-19	9.70417	61.5	99.6404	0.978241	0.322629	0.0462069	0.0326314	0.0155207	0.103603	0.0394396	2.33491	1.74219	1.28794	2.2536	2.36079
158	2009-10-22	12.225	72.9583	99.2967	1.6821	0.273002	0.0559511	0.0462137	0.0218599	0.123987	0.0508486	3.04113	1.09067	1.32975	2.40247	2.49613
159	2009-10-25	8.65833	73.4167	99.5913	0.644835	0.101915	0.0340891	0.0262842	0.00428552	0.0211535	0.038137	1.50619	1.3054	0.925794	2.33359	2.37899
160	2009-10-28	12.1583	83.9167	99.1621	1.14556	0.20051	0.0197493	0.0183251	0.00629858	0.0436392	0.0587297	4.31818	6.60361	3.4925	2.59334	2.61116
161	2009-10-31	10.0333	64.2083	98.4454	0.381807	0.124537	0.0237943	0.0115117	0.00385292	0.0237604	0.0390438	1.91227	0.35612	0.802695	1.77847	1.8233
162	2009-11-03	5.60833	63.9167	100.056	0.812664	0.0563853	0.024334	0.0266991	0.0104485	0.0624355	0.0536033	1.17077	1.17359	0.775831	2.47628	2.5681
163	2009-11-06	4.82917	63.7917	100.251	0.630266	0.215416	0.0126668	0.0158558	0.00778989	0.0530746	0.0400835	0.629195	0.692972	0.39301	2.37741	2.49649
164	2009-11-21	8.84167	85.3333	99.9067	1.53457	0.11141	0.0413991	0.155513	0.00518466	0.0831945	0.164405	3.70774	13.3408	5.32459	2.96993	3.00568
165	2009-11-24	8.52917	94.75	99.6633	0.405364	0.111669	0.0141698	0.0659838	0.000928759	0.0536697	0.0222619	4.97638	6.1275	3.50642	2.57689	2.6602
166	2009-11-27	3.19167	71.375	98.7775	0.451147	0.307187	0	0	0.000526468	0.0116668	0	0.375508	0.205589	0.178336	2.35713	2.39164
167	2009-11-30	3.025	65.2083	98.9079	0.31725	0.0970837	0.00832377	0.00119641	0.00271394	0.0222028	0	0.769864	0.539596	0.425578	2.19944	2.26465
168	2009-12-03	4.77917	82.0833	98.2483	0.404311	0.131414	0.000616795	0.00408181	0.0030918	0.0281886	0	1.28753	1.54698	0.939321	2.53851	2.57584
169	2009-12-06	-1.275	60.5833	100.135	0.394399	0.304477	0.017242	0.0428798	0.00376767	0.042265	0.00912864	3.46399	3.92673	2.34486	2.42337	2.51524
170	2009-12-12	-1.88333	60.6667	100.431	0.466118	0.181348	0.0135692	0.0103568	0.000399615	0.0222672	0	1.15968	1.30453	0.804668	2.62749	2.69246
171	2009-12-15	-0.0416667	75.625	99.7167	0.336824	0.340691	0.0669332	0.0358964	0.00699561	0.0463199	0	1.4533	2.77137	1.26757	2.5074	2.67099
172	2009-12-21	-1.2	85.4583	99.6213	0.145366	0.114686	0.0566955	0.10548	0.00408607	0.051015	0.291366	3.76366	10.457	4.20097	2.14036	2.10649
173	2009-12-24	-1.775	85.5417	100.177	0.622175	0.126801	0.0201294	0.0151196	0.00226722	0.0110904	0.0343299	1.16337	2.30072	1.11064	3.15546	3.17893
174	2009-12-27	-2.09167	76.9167	98.7667	0.256349	0.187415	0.0617634	0.0317771	0.00286264	0.0234154	0.0670588	1.65203	0.985717	0.917628	2.5606	2.6522
175	2009-12-30	-4.42917	76.0417	100.037	0.361651	0.420109	0.0749218	0.0301017	0.00146832	0.0246719	0.123896	1.22216	2.84836	1.26182	2.80581	2.86659
176	2010-01-23	0.820833	83.75	99.3967	0.737308	0.328234	0.0258352	0.0352114	0	0.0822802	0	0.917191	2.64358	1.11923	3.03254	3.13065
177	2010-01-26	-2.9875	74.625	98.2725	0.28067	0.215302	0.1699	0.0631646	0.0179686	0.119236	0.343015	2.81327	1.79321	1.51736	2.50477	2.70644
178	2010-01-29	-10.275	52.4583	100.785	0.401459	0.438374	0.161206	0.0251681	0.00908657	0.108567	0.108362	0.582005	0.728704	0.36426	2.64376
179	2010-02-01	-6.05	70.875	100.266	0.369481	0.495734	0.123931	0.076855	0.0158443	0.155998	0.305735	1.90435	5.8008	2.2155	2.52465	2.83852
180	2010-02-04	-2.51667	75.2917	100.597	0.657143	0.428668	0.0770587	0.055067	0.00319997	0.103328	0.124572	4.14595	5.78022	3.09757	2.87018	2.98209
181	2010-02-07	-4.75417	73.25	99.8446	0.520853	0.376044	0.125269	0.0194208	0.00136438	0.0415158	0.0465555	0.492116	0.561065	0.298586	2.94491	3.18028
182	2010-02-10	-3.75833	80.625	98.3125	0.199691	0.28087	0.0286168	0.0202658	0.00304817	0.0217517	0	0.673785	1.72313	0.763592	2.66743	2.79377
183	2010-02-13	-2.98333	73.9167	98.6967	0.314165	0.44574	0.0538749	0.037424	0.00456989	0.0380108	0.0661726	1.29334	3.16744	1.36352	2.60707	2.72095
184	2010-02-16	-3.05417	77.75	98.2408	0.336599	0.410143	0.0661577	0.0262465	0.00698385	0.040858	0.0382629	0.467351	1.38174	0.569744	2.76454	2.93815
185	2010-02-19	0.00416667	60.3333	99.5021	1.01821	0.490455	0.127826	0.0437513	0.0170096	0.117137	0.145645	0.586636	2.67441	0.90799	2.92085	3.10605
186	2010-02-22	-0.7375	92.1667	98.4746	0.393579	0.353214	0	0.0276489	0.0028998	0.0432821	0	1.28295	2.80548	1.32373	3.03733	3.11571
187	2010-02-25	-3.975	76.125	98.9067	0.362533	0.188787	0.020719	0.0096255	0.00387632	0.0345444	0	0.656547	0.834781	0.447296	2.79935	2.9107
188	2010-02-28	2.07083	76.2083	98.8692	0.363618	0.250681	0	0.00834554	0.00396418	0.0345037	0	0.980517	0.511522	0.527657	2.44705	2.51173
189	2010-03-03	0.6875	66.875	99.0512	0.720484	0.195081	0	0.00317863	0.0056783	0.0480804	0	0.675655	0.630211	0.432283	2.72787	2.81211
190	2010-03-09	5.99583	74.2083	99.2225	0.870219	0.554404	0.0249002	0.113162	0.026584	0.217571	0.122139	6.26136	12.8164	5.72205	2.49368	2.62157
191	2010-03-12	8.85833	92.5417	98.4108	1.18147	0.329044	0	0.0360882	0.00642647	0.077232	0.0459735	2.82512	7.2634	3.07431	2.97885	3.01724
192	2010-03-15	6.78333	72.9583	99.2812	1.45747	0.218986	0.0254981	0	0.00469906	0.0721163	0.034734	0.30805	0.501381	0.225279	2.77435	2.94956
193	2010-03-18	11.65	38.5	98.9062	2.17373	0.553514	0.082635	0.0772036	0.0407853	0.288667	0.0459418	0.834366	1.36139	0.782132	2.27379
194	2010-03-21	3.04167	69.7917	99.6467	0.472411	0.1653	0.0136931	0	0.00766156	0.0631227	0.00048248	0.934263	1.03641	0.577771	2.4356	2.54387
195	2010-03-24	7.13333	56.4583	99.3954	0.984071	0.177743	0.0288735	0.00980796	0.0193507	0.135345	0.0133249	0.938109	0.993433	0.582554	2.34733
196	2010-03-27	1.3375	61.3333	99.8804	0.598286	0.134102	0.0649686	0.0460626	0.00952465	0.111227	0.00532955	1.24767	0.965092	0.772942	2.55144	2.76872
197	2010-03-30	4.26667	79.1667	99.3225	0.637902	0.116764	0.0826248	0.253167	0.0746034	0.162759	0.0224641	6.01959	3.08583	2.68753	2.27249	2.63066
198	2010-04-02	19.0333	53.1667	98.985	1.54618	0.49453	0.0790774	0.113429	0.0347278	0.257848	0.0135404	3.71501	0.957942	1.61947	1.7593
199	2010-04-05	17.4125	52.6667	99.1096	2.74408	0.41309	0.0573497	0.0558716	0.0213612	0.171113	0.0140719	1.48357	0.516432	0.697657	2.0589
200	2010-04-11	12.5667	43.6667	100.332	1.57855	0.308178	0.0498356	0.0439945	0.0152	0.225502	0.00655689	1.48795	0.743877	0.783262	2.03816
201	2010-04-14	11.6875	55.6667	100.888	1.54272	0.529454	0.0373496	0.0430246	0.0124751	0.173466	0.00532345	1.99783	0.697721	0.972612	2.2009
202	2010-04-17	5.64167	52	99.3008	0.578901	0.173305	0.0199949	0.0142992	0.00824723	0.203419	0.000449564	0.428485	0.079462	0.126343	1.96756
203	2010-04-20	10.1833	54	99.3929	2.14611	0.540559	0.0544894	0.0457438	0.0292261	0.387097	0.0211577	1.42608	1.82635	0.938114	2.50948
204	2010-04-23	8.95417	50.5833	99.2654	2.2183	0.506231	0.0299135	0.042415	0.0204493	0.309366	0	2.17708	2.38248	1.44817	2.55381
205	2010-04-26	11.8292	59.3333	97.3812	1.78627	0.156739	0.0183342	0.0190174	0.00789658	0.154966	0	0.940548	0.566667	0.548863	2.28823
206	2010-05-02	19.5417	86.7083	98.1208	1.40801	0.369866	0.0190679	0.0258697	0.00153127	0.0130975	0.000203478	1.36237	0.331644	0.546934	2.17387	2.20943
207	2010-05-05	18.6833	60.7917	98.5196	2.08827	0.351985	0.0378745	0.0334236	0.0133622	0.0687323	0.0088616	1.77932	0.374811	0.664837	1.93246	2.0165
208	2010-05-08	8.675	71.25	98.5604	0.636185	0.121213	0.0200307	0.0345136	0.00281132	0.0195521	0.00636087	0.797278	0.586569	0.4374	2.20113	2.28354
209	2010-05-11	7.4125	87.2917	99.5554	0.713535	0.360656	0.0188647	0.0191414	0.00258509	0.0165246	0.00393966	1.00261	0.354376	0.476087	2.60324	2.65377
210	2010-05-14	16.7625	64.125	99.6108	0.589109	0.167192	0.0459262	0.0399487	0.0190893	0.261454	0.0186659	2.15009	1.68016	1.12805	1.70797	1.9762
211	2010-05-17	12.95	76.9583	99.5096	1.37502	0.465975	0.038977	0.029941	0.0119743	0.197737	0.0191634	1.21739	0.30156	0.442016	2.3013	2.56505
212	2010-05-20	19.9292	53	99.5392	1.76865	0.557376	0.0491971	0.0568979	0.0336866	0.232889	0.0029197	2.25933	0.610193	0.824854	1.7079
213	2010-05-23	19.9958	81.5	99.6688	1.41612	0.39159	0.0168581	0.158749	0.0151059	0.0687134	0	3.52607	1.80054	1.54282	2.06894	2.14724
214	2010-05-29	21.6833	61.5417	99.2408	2.02622	0.390078	0.014208	0.0316039	0.0124915	0.095995	0	1.11867	0.228131	0.523815	1.79236	1.92215
215	2010-06-01	22.3042	71.5833	98.9246	2.03378	0.620895	0.0226752	0.0285769	0.0083782	0.0562294	0.0198641	3.12238	1.92948	1.53119	1.95394	1.99012
216	2010-06-04	20.4917	78.2083	98.6312	1.72535	0.887622	0.0369409	0.0273803	0.00804052	0.0753691	0	3.26279	1.43047	1.50229	2.07642	2.12903
217	2010-06-10	21.0167	61.8333	99.1275	1.85853	0.763308	0.0191805	0.0150303	0.0103903	0.0706611	0	0.771616	0.163838	0.277722	1.7712	1.91642
218	2010-06-13	21.5417	78.9583	99.1817	1.6788	0.835596	0.0475374	0.0460898	0.00712795	0.0727288	0	3.82481	0.383239	1.33893	1.93149	1.98841
219	2010-06-19	24.8875	65.875	99.0312	2.10562	0.562227	0.0550391	0.0472038	0.00779147	0.0434308	0	1.64815	0.260576	0.535447	1.66589	1.74133
220	2010-06-22	25.5292	68.5	99.2725	1.93524	0.671503	0.0369326	0.0314544	0.0116181	0.0823794	0	1.57634	0.375997	0.554304	1.64139	1.73716
221	2010-06-25	22.3958	54.6667	99.5492	1.10452	0.658988	0.0384065	0.110656	0.0222857	0.153184	0	2.07133	0.373233	0.773472	1.40338
222	2010-06-28	25.4292	63.4167	98.175	2.15949	1.01729	0.0513969	0.0414364	0.0130457	0.0949517	0.00780778	1.52134	0.283725	0.515984	1.62617	1.75018
223	2010-07-01	18.4667	56.7917	100.378	1.7694	0.555173	0.0385769	0.0864108	0.0168046	0.0750786	0.00153614	0.399352	0.280429	0.140983	1.82571
224	2010-07-04	26.7625	58.9583	99.3158	1.86569	1.66288	0.0755357	0.758412	0.0795687	0.221954	0.00195653	6.72506	1.3263	2.19945	1.40497
225	2010-07-16	26.4333	60.7917	99.1112	3.64998	1.46281	0.0386339	0.0777159	0.0388269	0.194572	0.0155064	2.35732	0.456191	0.820407	1.78007	1.93185
226	2010-07-19	23.2583	79.7083	98.9479	1.49986	0.508153	0.0162673	0.0336585	0.0119334	0.0861898	0	1.27715	0.402993	0.48778	1.83628	1.95174
227	2010-07-22	23.7958	68.5833	99.4054	1.72636	0.666091	0.0119925	0.0342304	0.0121706	0.104251	0	2.71967	0.387656	0.85997	1.6508	1.71837
228	2010-07-28	25.1667	80.125	99.11	1.55097	0.814623	0.00480809	0	0	0.023591	0	0.0209436	0.582351	0.16907	1.80257	3.12269
229	2010-07-31	22.4304	75.2609	99.0557	1.48176	0.601765	0.0036733	0.0670487	0.0113476	0.188119	0	2.2548	0.350173	0.736776	1.76098	1.90171
230	2010-08-03	25.825	76.5833	99.1971	1.65613	0.741456	0.0390789	0.0944815	0.0202974	0.235001	0	10.5396	0.750251	3.22673	1.52463	1.62419
231	2010-08-06	22.5125	60.1667	98.9167	1.71281	0.374769	0	0.0282259	0.0144001	0.124259	0	1.02618	0.198815	0.332642	1.62751	1.79895
232	2010-08-15	27.7167	69.7917	98.84	2.59895	0.618556	0.0265217	0.063292	0.0164654	0.139019	0	3.9656	0.653522	1.21982	1.64835	1.71492
233	2010-08-18	22.7167	55.0417	99.4975	2.33341	0.588029	0.0173301	0.0371236	0.0177901	0.134951	0	1.08033	0.295578	0.366929	1.70291
234	2010-08-21	22.6304	88.913	98.8226	2.59772	0.447552	0.0554314	0.00532151	0.00777511	0.0663494	0.0420354	5.92371	1.44209	2.37349	2.34611	2.37635
235	2010-08-24	20.6292	84.5	99.4533	2.20416	0.201882	0	0	0.00193382	0.0144138	0.0281055	0.999625	0.27862	0.363047	2.23976	2.25438
236	2010-08-27	19.2458	62.25	99.8612	1.57137	0.687735	0.00102031	0.00722225	0.0106589	0.0841039	0.0298468	1.77514	0.463676	0.612114	1.78476	1.84916
237	2010-08-30	27.4	63.625	100.092	1.92312	0.989287	0.0104338	0.0494437	0.0227259	0.199703	0.0329717	8.62715	0.659794	2.69637	1.40224	1.46517
238	2010-09-05	16.5125	56.7083	99.2712	1.34771	0.296467	0.000848658	0.0268037	0.0054773	0.0278975	0.0378351	1.41411	0.3081	0.468088	1.78894
239	2010-09-08	16.9542	56.3333	99.2942	1.48968	0.173546	0	0	0.0178898	0.0568646	0.0220759	0.657409	0.125655	0.155569	1.79472
240	2010-09-11	15.2417	82.1667	99.1229	1.53707	0.430273	0	0.022839	0.00866382	0.0427614	0.0579006	0.943179	0.749138	0.516932	2.39954	2.45582
241	2010-09-14	17.7625	53.9167	99.5362	1.91861	0.6081	0	0	0.011075	0.0485711	0.0291205	0.44701	0.209968	0.0966514	1.85463
242	2010-09-17	14.4167	77.5833	99.6896	1.14737	0.291786	0.0256628	0.027028	0.00783853	0.0532799	0.0357861	1.05502	0.392395	0.390872	2.14571	2.24823
243	2010-09-20	16.0833	62.25	99.9029	1.27876	0.28991	0.00563229	0	0.0054122	0.0333953	0.0171849	0.377876	0.167173	0.0792737	1.85007	1.97163
244	2010-09-23	22.8417	70.75	99.4733	2.29821	0.448137	0.0525837	0.0607101	0.0183714	0.127922	0.0348055	2.90765	0.919428	1.15735	1.90509	1.99593
245	2010-09-26	12.1542	71.5	99.6667	0.750125	0.159226	0.0167427	0.00186297	0.00265257	0.00909271	0.02274	0.65931	0.157106	0.189063	1.94112	1.98049
246	2010-09-29	15.1167	78.5833	98.9062	1.00227	0.374478	0.0552114	0.0295432	0.0143306	0.0736888	0.0314768	2.95426	1.83982	1.49983	2.1865	2.25854
247	2010-10-02	9.92917	89.3333	99.41	0.82828	0.144312	0.015205	0	0.00630081	0.0308971	0.0447668	0.558194	0.307569	0.197507	2.55553	2.63422
248	2010-10-11	17.6	74.3333	98.7408	3.69515	0.323211	0.0590073	0.0497007	0.043326	0.223586	0.0412413	2.72058	2.03546	1.25644	2.50303	2.63161
249	2010-10-14	11.9042	69.125	99.11	1.0332	0.0333868	0.0103738	0	0.0195128	0.0921517	0.0146312	0.477364	0.288966	0.166066	2.09169	2.46483
250	2010-10-17	13.1167	51.875	99.3383	1.92522	0.121104	0.0288312	0.0475606	0.0117292	0.0396583	0.0205848	0.780635	0.663974	0.374958	2.13509
251	2010-10-20	11.975	57.3333	98.4579	2.77231	0.149406	0.057536	0.0384806	0.0378547	0.178814	0.0441663	1.792	1.27871	0.853386	2.47142
252	2010-10-23	13.7792	57.4583	99.4929	3.99401	0.459645	0.0778635	0.252641	0.0250401	0.115846	0.0269953	1.62179	1.65054	0.892733	2.58142
253	2010-10-26	16.4083	81.1667	97.5329	1.68697	0.230633	0	0.0533749	0.0100927	0.0657063	0.0257425	1.17666	0.380383	0.421191	2.27363	2.36797
254	2010-10-29	7.65	53.9167	99.9642	1.13171	0.0889655	0.0745863	0.0806511	0.0171168	0.129769	0.0974527	1.07416	0.588738	0.437098	2.23274
255	2010-11-01	3.70417	64.4583	100.79	1.45042	0.121079	0	0.00121353	0.00665	0.0359091	0.0483519	0.764747	0.881449	0.548482	2.84257	2.87822
256	2012-03-31	3.925	77.7917	99.1933	1.3302	0.114695	0	0.00428849	0.00522463	0.0699237	0	2.48267	3.04692	1.75901	2.95927	2.99832
257	2012-04-03	8.4125	75.2917	99.1579	0.135875	0.163328	0	0.0201952	0.0116925	0.110309	0.0126261	3.74938	2.94895	2.09012	2.00946	2.10234
258	2012-04-06	5.90417	58.25	100.093	1.10562	0.189114	0	0	0.00855529	0.0402573	0.000265696	0.790726	0.532767	0.399179	2.4329
259	2012-04-09	10.3875	45.75	98.9221	1.36753	0.247808	0.00114231	0.00709596	0.0254911	0.233438	0.09032	1.26703	0.621789	0.545562	2.08221
260	2012-04-12	7.03333	64.5417	99.9963	0.893498	0.330496	0.0283084	0.0314222	0.0220224	0.118101	0.0482342	1.98894	1.88593	1.12339	2.37846	2.49607
261	2012-04-15	17.8042	79.9583	98.8092	3.00407	0.230465	0.0441332	0.0526201	0.0141825	0.0921209	0.0266208	3.91322	3.34992	2.39522	2.56118	2.60496
262	2012-04-18	8.975	61.9167	99.9896	1.93684	0.485213	0.0205507	0.033861	0.0223173	0.150509	0.0460281	2.9997	2.22048	1.55543	2.55005	2.63855
263	2012-04-21	5.53333	71.7083	99.1679	0.847293	0.236868	0.0013709	0.0115193	0.00853504	0.0406848	0.0300807	1.26794	0.255082	0.504556	2.43572	2.48759
264	2012-04-24	10.5167	32	97.875	0.555606	0.197074	0.0762247	0.0887024	0.0278171	0.165501	0.123537	1.15825	0.114533	0.427582	1.51198
265	2012-04-27	6.37917	47.3333	99.9379	0.39833	0.214812	0.121308	0.202575	0.0144771	0.0811036	0.189308	1.29986	0.586272	0.570513	1.814
266	2012-05-06	14.8708	53.6667	99.5958	3.74035	1.21695	0.0323903	0.00526575	0.0209156	0.10112	0	2.50289	1.34406	1.06223	2.4016
267	2012-05-09	13.6667	69.5833	98.6479	2.04391	0.653213	0	0.0208334	0.019779	0.152964	0.0125312	1.54064	0.940739	0.653141	2.37223	2.50173
268	2012-05-12	18.4583	58.75	99.9525	3.02092	0.929313	0.0122529	0.0462142	0.0165794	0.119937	0.00925415	2.86154	1.48793	1.35609	2.14977
269	2012-05-15	19.5083	49.2917	99.1042	2.40985	1.17631	0.0199231	0.0406206	0.0384158	0.261609	0.0177698	2.35115	0.834345	0.87362	1.83973
270	2012-05-18	16.1	53.1667	99.7858	1.36427	0.62549	0	0.0691325	0.0288253	0.156266	0.00216268	2.36894	0.678507	0.947391	1.82092
271	2012-05-21	21.0042	65.4167	99.2925	0.4481	0.0364374	0	0	0.00975412	0.0513237	0	0.271526	0.0897096	0.125571	1.21644	1.55727
272	2012-05-24	22.5167	65.4583	98.9496	2.43277	2.75588	0.00323579	0.0236156	0.136672	0.827902	0.0055991	6.65232	1.65022	2.45955	1.85489	2.13226
273	2012-05-27	20.925	70.9583	99.5658	3.64465	0.894501	0	0.0200032	0.0079594	0.0220897	0	2.17796	0.528925	0.881352	2.21539	2.23413
274	2012-05-30	19.1542	52.5833	98.7804	2.54928	0.466677	0	0	0.0192826	0.0993057	0	1.02597	0.232711	0.423807	1.9121
275	2012-06-08	22.9625	46.125	99.3075	2.69116	1.17207	0.0133818	0.0454059	0.0443004	0.255722	0.0521702	1.71198	0.302241	0.576984	1.66678
276	2012-06-11	22.8625	74.8333	99.1538	2.51187	1.22812	0.0101434	0.0366125	0.0272375	0.151356	0.00386228	5.1295	0.554331	0.142183	1.5372	1.6353
277	2012-06-20	28.6792	53.9583	99.4717	2.99149	1.26636	0.130558	0.0476175	0.0483021	0.258451	0.00365273	3.56892	0.362599	1.3192	1.51597
278	2012-06-23	21.4417	61.625	99.4592	1.95993	1.21511	0	0.113915	0.0188233	0.0593788	0.00753207	1.38165	0.266063	0.548775	1.78287	1.89419
279	2012-06-26	21.2708	45.0417	99.3429	1.48159	0.492878	0	0.105253	0.0195276	0.078394	0.0039818	0.713777	0.160169	0.260892	1.48634
280	2012-06-29	28.4083	55.1667	98.6992	3.42708	0.710549	0.00665153	0.153183	0.0530277	0.244403	0.0038068	2.56149	0.411437	0.862951	1.58778
281	2012-07-08	23.8083	60.625	99.3929	1.7096	0.685684	0	0.0194134	0.00852745	0.0307367	0	0.347649	0.0522019	0.155712	1.5843	1.73256
282	2012-07-11	22.7	55.25	99.8717	1.47156	1.31855	0	0.00339887	0.00873278	0.0457849	0	1.77682	0.15323	0.682926	1.52106
283	2012-07-14	23.475	76.8333	99.6513	1.08581	0.540499	0	0.0131776	0.00717745	0.0748953	0	4.08749	0.195246	1.31178	1.55921	1.60015
284	2012-07-29	22.5167	63.8333	99.5879	1.13895	0.655648	0	0.00644697	0.0163651	0.103865	0.00256177	3.54477	0.275296	1.27033	1.50072	1.55993
285	2012-08-01	23.8917	66.5417	99.0387	1.48636	0.538025	0	0.00227862	0.0160542	0.109537	0.0233287	0.845883	0.31465	0.373198	1.60339	1.77757
286	2012-08-04	26.4375	76.375	99.1367	1.31624	0.413987	0.0197302	0.0595953	0.0154168	0.0924551	0.0208326	5.07876	0.467168	0.124808	0.395929	0.55978
287	2012-08-07	24.3125	61.4583	99.2212	2.506	1.20887	0.0712414	0.0209622	0.0316896	0.169602	0.00475381	2.38626	0.682729	0.970803	1.74907	1.88858
288	2012-08-10	19.3125	86.7083	98.3025	1.13408	0.141535	0	0	0.00601263	0.0425825	0	1.12931	0.43916	0.472669	2.09618	2.14644
289	2012-08-13	20.9958	72.5833	99.29	2.94624	0.413167	0.0690972	0.0148357	0.0251311	0.120887	0	2.36248	0.943073	0.997838	2.14583	2.24808
290	2012-08-16	22.5083	76.9583	98.94	1.90991	0.551368	0.00126411	0.0280385	0.0144095	0.0714597	0	2.99767	1.26293	1.33601	1.97449	2.01719
291	2012-08-19	19.425	62.3333	99.125	1.63935	0.670118	0	0.0210041	0.0144102	0.0818126	0	1.26445	0.387579	0.501184	1.816	1.91097
292	2012-08-28	21.6875	71.2917	99.53	2.01098	0.465852	0	0	0.0108215	0.0592291	0.00115267	1.97155	0.454565	0.768041	1.90556	1.94338
293	2012-08-31	26.7917	59.7083	99.3954	2.92497	1.35216	0.0573569	0.0529163	0.0416293	0.265604	0.00373668	4.50202	0.738336	1.65828	1.65883
294	2012-09-03	24.4208	79.625	99.1488	1.75706	0.558953	0	0.0196448	0.00578449	0.0593706	0	5.82244	0.341573	1.90766	1.78122	1.80374
295	2012-09-06	23.4708	78.3333	98.9379	2.44222	0.65402	0.00793684	0.0353076	0.0109405	0.0940123	0.0148619	4.17192	0.718768	1.57845	2.01288	2.05235
296	2012-09-09	16.7625	60.5	99.2229	1.09958	0.226843	0.0184711	0.079449	0.0302138	4.11141	0.0280516	0.821203	0.196178	0.16743	1.69144
297	2012-09-15	16.2417	62.8333	100.18	1.51131	0.34833	0	0.00236641	0.0078209	0.0507995	0	0.569768	0.205335	0.208401	1.9436	2.05155
298	2012-09-18	15.375	75.1667	98.4258	1.1183	0.135821	0	0.00333004	0.00418279	0.0210722	0	1.80882	0.741787	0.828882	2.09065	2.10963
299	2012-09-21	15.1792	64.7917	98.9521	2.12515	1.01408	0.0525853	0.0293309	0.0280091	0.180406	0.121739	0.881014	0.50816	0.333283	2.22223	2.55517
300	2012-09-24	11.7917	58.6667	99.6571	1.32023	0.550888	0	0.000940207	0.0166471	0.0935546	0.0237352	0.717878	0.309937	0.301255	2.11205
301	2012-09-27	13.0708	65.9167	99.9887	1.44139	0.153117	0.0127235	0.726428	0.00714869	0.0404931	0.0328966	0.780504	0.111865	0.258159	2.12079
302	2012-09-30	12.6833	78.625	99.1229	1.48128	0.366429	0	0.0197046	0.00756704	0.0436634	0	1.50346	0.941456	0.798146	2.46531	2.5095
303	2012-10-03	17.0792	86.0833	99.3438	2.2965	0.332921	0	0.00236661	0.00886335	0.0979002	0.0197269	2.80648	2.51545	1.70958	2.60354	2.64064
304	2012-10-06	7.69583	74.625	99.3929	0.972352	0.150309	0	0	0.00597916	0.04739	0.0183194	1.25939	1.43437	0.826579	2.5588	2.59653
305	2012-10-12	6.62083	63.7083	100.525	1.12651	0.142819	0.0197553	0.0136686	0.0072862	0.0580403	0.0518308	0.591718	0.247252	0.268874	2.41157	2.57523
306	2012-10-15	10.7542	74.0833	98.5467	0.837559	0.054284	0	0	0.0108085	0.0605548	0.0150944	0.540087	0.0765619	0.218436	2.14374	2.29948
307	2012-10-18	14.125	64.9167	97.8629	1.24915	0.161386	0	0.00690691	0.0111389	0.0743992	0	1.07726	0.407445	0.474902	2.0265	2.12252
308	2012-10-21	9.95833	80.0833	99.5079	0.612575	0.339155	0.020952	0.0493168	0.00682325	0.105587	0.148014	2.1551	2.01247	1.38045	2.36871	2.4193
309	2012-10-24	18.5625	81.5	99.3713	2.11748	0.566381	0.0225026	0.0333004	0.0146977	0.091402	0.00233672	2.73919	1.18124	1.26238	2.32177	2.3847
310	2012-10-27	8.24583	65.8333	99.8838	0.738325	0.0501094	0	0	0.00207307	0.00351692	0	0.890183	0.120521	0.336063	2.10403	2.11207
311	2012-11-02	4.52083	64.2917	99.0567	0.63769	0.126543	0.0301424	0.0397403	0.00691209	0.037455	0.0132391	0.235179	0.191245	0.131187	2.30432	2.79436
312	2012-11-05	2.8	67.5417	99.9408	0.815366	0.195169	0.031535	0.0354133	0.0090818	0.0423055	0	1.31949	0.786825	0.668478	2.59875	2.69548
313	2012-11-08	2.65417	77	99.8908	1.44105	0.207492	0.0434966	0.125237	0.0211855	0.143699	0.102839	2.06503	4.64615	2.09093	3.10122	3.1964
314	2012-11-11	14.3375	57.1667	99.6283	1.61426	0.386434	0.00506948	0.0591517	0.00885174	0.0445796	0	2.21179	0.466098	0.922201	2.03738
315	2012-11-14	0.7	69.875	101.096	1.33203	0.209287	0.0132468	0.101298	0.0211371	0.129675	0	1.9003	3.48523	1.63401	3.05803	3.17528
316	2012-11-17	3.9	81.875	101.208	1.4481	0.442466	0.0409524	0.17365	0.0206045	0.170033	0.139479	3.09766	12.632	4.74707	3.09969	3.18645
317	2012-11-20	7.2125	84.4583	99.7858	3.00495	0.104097	0.0758079	0.184737	0.039684	0.242879	0.0167402	2.71337	9.56626	3.4675	3.26279	3.36846
318	2012-11-23	5.59583	73.4583	98.7567	1.09742	0.0901911	0.0324606	0.0803998	0.0452802	0.0737342	0	2.06388	1.06146	0.933847	2.60527	2.74212
319	2012-11-26	1.12917	60.25	99.8279	0.81131	0.141714	0.0327433	0.0633733	0.0183647	0.103157	0	1.65276	1.82976	1.03532	2.63772	2.81147
320	2012-11-29	2.60833	66.5417	100.176	1.51073	0.118868	0.0772653	0.184849	0.0248467	0.186027	0.184545	2.96058	7.95121	3.31537	3.00006	3.1087
321	2012-12-02	11.55	92.9583	99.3004	1.40704	0.0307889	0.051158	0.118059	0.00711291	0.0443804	0.770277	3.57202	2.33475	2.38907	3.00723	2.96909
322	2012-12-05	1.20417	64.5417	100.375	0.804396	0.102803	0.0339778	0.0284694	0.0128447	0.0619371	0.0101036	0.431441	0.466263	0.245121	2.69815	2.93974
323	2012-12-08	3.84167	94	99.1388	0.458171	0.164446	0.0025119	0.0519181	0.00395015	0.0250466	0.0317961	1.53234	2.91856	1.52408	3.03201	3.07494
324	2012-12-11	-0.316667	65.0833	99.36	0.398921	0.246592	0.0106825	0.0370678	0.0261897	0.155892	0.058377	1.47168	1.45486	0.856634	2.40621	2.65471
325	2012-12-14	2.6125	73.875	100.02	0.593047	0.418126	0.0856511	0.195636	0.0317087	0.218813	0.756077	3.19424	6.79876	3.19936	2.69117	2.70938
326	2012-12-17	5.625	77.9583	98.2433	0.374363	0.330238	0.0058897	0.0511224	0.0131979	0.0865383	0.031583	2.32979	3.11166	1.75579	2.40316	2.49324
327	2012-12-20	4.90417	87.75	98.0058	0.685053	0	0.0168221	0.0938391	0.008399	0.0558556	0.0525243	3.43065	8.76981	3.76205	2.85652	2.9175
328	2012-12-23	-1.68333	72.9583	99.1771	0.149029	0.37517	0.0239102	0.0625484	0.00557375	0.0288306	0.0907582	1.3942	5.34858	2.15264	2.53334	2.58438
329	2013-01-01	-4.74167	63.375	99.5529	0.197717	0.165959	0.058461	0.0640785	0.00650632	0.027714	0.244809	1.46958	1.29727	0.989631	2.55509	2.56152
330	2013-01-04	-3.17083	72.2083	99.6221	0.0713998	0.203652	0.065959	0.108695	0.00987858	0.0492727	0.872388	2.99103	5.76957	3.10766	2.78563	2.32371
331	2013-01-16	-0.85	67.8333	99.1371	0.569789	0.353206	0.0772492	0.137429	0.0233015	0.153393	0.134081	1.68215	5.51526	2.12421	2.72863	2.94381
332	2013-01-19	5.13333	58.25	98.815	0.791924	0.307911	0.0718197	0.112217	0.0160383	0.081009	0.0280801	1.24156	1.57648	0.835202	2.41498
333	2013-01-22	-14.2958	50.6667	100.036	0.228338	0.585482	0.269686	0.0326889	0.0329971	0.0975744	0.130071	1.01194	0.721802	0.402234	0.850958
334	2013-01-25	-8.375	78.8333	99.9921	0.177878	0.692658	0.116157	0.0540936	0.0102259	0.045441	0.119491	1.96351	3.78717	1.82568	2.29736	2.7416
335	2013-01-28	3.4875	96.8333	99.2075	0.34133	0.158042	0.0865275	0.105481	0.00586745	0.0265309	0.282785	3.06531	3.35393	2.2575	3.16409
336	2013-01-31	-4.25	69	98.0179	0.142317	0.151171	0.063391	0.0866154	0.0116286	0.0518505	0.0968778	1.14056	0.656766	0.553663	2.18989	2.48125
337	2013-02-06	-5.22917	73.0417	99.9833	0.0825838	0.356749	0.117177	0.0540523	0.0176407	0.0616537	0.209108	1.58456	2.74535	1.41962	2.33318	2.57046
338	2013-02-09	-5.43333	77.1667	100.571	0.148514	0.400084	0.0596197	0.0314877	0.00573008	0.0210689	0.0359375	1.88571	1.71713	1.24871	2.49696	2.67538
339	2013-02-12	-0.0125	67.1667	99.2075	0.251565	0.551733	0.077979	0.0586434	0.0308473	0.126731	0.131206	2.31444	1.95691	1.36834	2.19219	2.4532
340	2013-02-15	-1.2625	56.5	99.3475	0.24742	0.884754	0.0994367	0.0165223	0.0118912	0.048434	0.0675351	0.847172	0.465471	0.391447	1.96696
341	2013-02-18	-2.2625	68.8333	99.2921	0.44578	0.538592	0.0835314	0.045502	0.00721725	0.0304039	0.0333254	1.21846	2.11644	1.03703	2.65635	2.81017
342	2013-02-21	-6.05417	67.9167	100.377	0.213941	0.305929	0.104947	0.0083542	0.00882191	0.0253425	0.073367	0.970669	0.573507	0.483297	2.39559	2.64126
343	2013-02-24	-1.44583	72	99.3542	0.371712	0.390712	0.0322026	0.0605243	0.00795554	0.0425664	0.0886828	3.02361	3.92788	2.15212	2.47081	2.55195
344	2013-02-27	1.3625	95.2083	97.7479	0.148689	0.286407	0.0181238	0.0290488	0.00585094	0.0139613	0.0381079	1.06265	2.35599	0.896163	2.02603	2.09858
345	2013-03-02	-3.07083	70.25	99.4575	0.432228	0.224333	0.00389815	0.0157117	0.00573549	0.0177748	0	0.853289	0.229899	0.3619	2.64985	2.71366
346	2013-03-05	-2.28333	76.4167	99.2771	0.52675	0.181874	0.0581523	0.0190517	0.013275	0.0284106	0.0183781	1.6003	2.29511	1.16088	2.83615	2.94288
347	2013-03-08	0.708333	66.375	100.776	0.818089	0.54056	0.0420659	0.037547	0.0181789	0.110913	0.0480649	1.06476	2.15228	0.888284	2.73236	2.8891
348	2013-03-11	9.30417	79.0417	98.2346	0.573719	0.350689	0.0217731	0.0455153	0.00911312	0.0382121	0.0164336	1.27044	0.518906	0.591292	2.22344	2.31911
349	2013-03-14	0.0166667	49.6667	99.9058	0.560514	0.895829	0.053516	0.0460268	0.0219616	0.118149	0.227109	1.05769	0.995475	0.613716	2.25142
350	2013-03-17	-2.575	65.1667	99.9517	0.404928	0.302122	0.029541	0.0166508	0.00786667	0.0247794	0.00423073	1.17212	0.460232	0.516258	2.49189	2.60718
351	2013-03-20	-3.05833	55.6667	99.0196	1.05222	0.174879	0.0307226	0.0301484	0.0214248	0.131089	0.00418667	1.2766	1.79734	0.812561	2.91536
352	2013-03-23	-0.2375	68.7083	99.5033	0.809972	0.401478	0.0466679	0.0598464	0.0102769	0.0523971	0.0532245	1.1903	2.42907	1.08434	2.86345	2.95989
353	2013-03-26	3.58333	63.5833	99.3142	1.24452	0.334481	0.0376526	0.00783002	0.00951115	0.0381152	0	0.266278	0.443844	0.185907	2.79763	2.99149
354	2013-03-29	5.74167	45.9583	100.112	1.37124	0.66634	0.0483785	0.0361739	0.0243613	0.0994051	0.00271109	0.696975	2.47931	0.847802	2.57743
355	2013-04-01	1.45833	46.0833	99.1046	0.544887	0.27589	0.0147503	0.00707274	0.0155325	0.109433	0	1.14053	0.261587	0.484127	2.19477
356	2013-04-04	3.875	45.2083	99.8287	0.706406	0.833458	0.0370817	0.0389308	0.0233357	0.113436	0.021785	1.57099	2.56673	1.18804	2.20031
357	2013-04-07	11.4583	53.1667	98.7613	3.3193	0.443468	0.0147732	0.0568897	0.0204423	0.109921	0	2.62364	2.43077	1.5751	2.5991
358	2013-04-13	4.57083	68.0833	98.8804	0.332593	0.395139	0.0462244	0.0542482	0.00755251	0.0229747	0.011231	2.05285	1.15952	1.02753	2.13376	2.2377
359	2013-04-16	13.2417	69.375	99.4971	1.6635	0.307782	0.0197983	0.025137	0.0113559	0.0547575	0	1.03066	1.19417	0.70334	2.37533	2.47173
360	2013-04-19	8.38333	74.375	97.8579	0.462535	0.185508	0.0142673	0.0152743	0.00613873	0.0156051	0	1.64313	0.374459	0.667252	2.05291	2.10352
361	2013-04-22	8.04583	59.125	100.438	0.655018	0.363348	0.0240487	0.0391013	0.00916831	0.030615	0	2.50279	1.43209	1.29904	2.14737
362	2013-04-25	6	64.75	99.9392	0.501884	0.441918	0.0364154	0.0468092	0.0130192	0.0505309	0	2.89349	1.19464	1.30293	2.11387	2.22303
363	2013-04-28	10.925	84.4583	99.1696	1.58624	0.89769	0.00662143	0.0433609	0.00539045	0.0173446	0.00145657	2.16249	1.60615	1.27744	2.71239
364	2013-05-01	18.2125	69.375	99.9875	1.06059	0.522361	0.0110556	0.0308855	0.0111411	0.0641177	0	2.84017	0.449143	1.01242	1.75305	1.81208
365	2013-05-04	16.2542	50.75	99.7167	2.09279	0.636409	0.0257791	0.0141035	0.0102667	0.0125056	0	1.29704	0.489366	0.561421	1.9796
366	2013-05-10	16.6333	74.5417	98.6963	2.84273	0.516917	0	0.010743	0.00920042	0.0408326	0	2.26099	1.24622	1.12011	2.44521	2.47261
367	2013-05-16	19.2708	47.1667	98.965	3.86148	0.939391	0	0.0266187	0.0285349	0.230246	0	0.871277	0.35777	0.352357	2.04614
368	2013-05-19	21.2375	62.9583	99.2779	3.32365	0.617259	0	0.11482	0.0142341	0.034064	0	2.84526	0.893471	1.1635	2.04947	2.09137
369	2013-05-22	22.0375	70.5417	98.3933	3.7613	0.317728	0.00810258	0.0231616	0.0170263	0.0632049	0.00825872	2.39984	0.713026	0.913121	2.82937	2.19142
370	2013-05-25	10.4417	55.75	100.465	1.55705	0.307167	0	0.010088	0.00327159	0	0	0.497659	0.483885	0.303722	2.27351
371	2013-05-28	17.8167	89.875	99.0475	2.50261	0.310537	0.00574092	0.0504693	0.00482097	0.0439151	0	2.90227	3.48682	2.06599	2.73005	2.75626
372	2013-05-31	23.3458	74.2917	99.1846	3.35451	0.553555	0.0373926	0.0605871	0.0203904	0.0544893	0	2.48451	0.673148	0.889061	2.08336	2.14225
373	2013-06-06	15.325	65.375	99.0321	2.47144	0.697211	0	0.0318396	0.0109488	0.0517571	0	1.24799	1.19303	0.859166	2.37561	2.44332
374	2013-06-09	19.0667	65	99.5821	2.48161	0.579012	0.000702329	0.049539	0.00494474	0.0292274	0	4.462	1.46321	2.00661	2.10108	2.11981
375	2013-06-12	20.8042	82.2083	98.8096	3.72838	0.672565	0.00794871	0.0358396	0.0150012	0.0755452	0	5.05059	3.384	2.93292	2.52839	2.55503
376	2013-06-15	19.8708	70.9583	99.4229	2.30606	0.626801	0.0411187	0.0680144	0.0123533	0.0484271	0	2.82255	1.41863	1.35427	2.11277	2.16809
377	2013-06-18	17.3667	69.3333	99.3088	1.86155	0.233942	0.0167333	0.0197693	0.00641318	0.0235696	0	0.443598	0.260159	0.277064	2.99938	2.20782
378	2013-06-21	23.0625	62.25	99.8958	2.57899	1.78739	0.00597143	0.0515552	0.0194571	0.111456	0	4.48716	0.730514	1.78508	1.84	1.88988
379	2013-06-24	26.0542	68.2917	99.3967	2.38331	1.11129	0.0216896	0.0746853	0.0155153	0.0656468	0	4.96333	0.837758	1.71913	1.6924	1.7311
380	2013-06-27	22.5917	85	98.4237	1.35827	0.993915	0.0158396	0.0408032	0.00817967	0.0146362	0	1.69117	0.653112	0.719273	1.97316	2.01507
381	2013-07-06	23.45	84.7083	99.6179	1.57257	0.621728	0.0156404	0.0810624	0.012588	0.00388644	0	4.09355	0.699508	1.42159	1.92423	1.95449
382	2013-07-09	24.85	84.9167	99.1854	2.05176	0.838257	0.0011038	0.0525599	0.0208003	0.0321081	0	3.53351	1.30347	1.49289	2.04094	2.07444
383	2013-07-12	20.8583	71.5833	99.7654	1.60223	0.980028	0	0.00602889	0.00291903	0	0	1.75501	0.154004	0.608462	1.83609	1.8387
384	2013-07-15	26.7667	79.7083	100.276	1.94292	1.07754	0	0.0235762	0.00818585	0.0260803	0	4.13093	0.439638	1.34705	1.73304	1.74814
385	2013-07-18	27.7458	77.1667	99.6188	3.22418	0.726883	0.0350204	0.0199555	0.0151032	0.0675947	0	3.58216	0.374584	1.1772	1.87567	1.91373
386	2013-07-21	22.4375	69.125	99.2517	1.63092	0.593017	0	0.0243317	0.0039817	0	0	1.73181	0.188219	0.613777	1.72901	1.73723
387	2013-07-24	17.2708	62.5417	99.3108	1.14507	0.305253	0	0.00410167	0.00306592	0	0	0.203995	0.079014	0.0963714	1.76818	1.793
388	2013-07-27	19.3125	83.5417	98.8025	1.2063	0.25312	0	0.0179538	0.00856577	0.014039	0	3.80127	0.470673	1.40174	2.0104	2.02636
389	2013-07-30	19.1708	71.9583	99.9704	1.27078	0.666727	0	0.0249113	0.0121063	0.0780865	0	3.52182	0.550801	1.11324	1.76809	1.8206
390	2013-08-02	20.0542	70.7083	99.0279	2.21031	0.694269	0.0185504	0.0400783	0.0134137	0.111809	0	2.02203	0.387619	0.695639	2.00782	2.0983
391	2013-08-05	18.2167	68.5833	99.5892	1.1005	0.51827	0	0.0126721	0.00592071	0.0476463	0	0.956419	0.185221	0.326924	1.76442
392	2013-08-08	21.4958	78.125	99.2346	1.86027	0.768009	0	0.013111	0.00524796	0.0412368	0	1.45323	0.395765	0.522724	1.98674	2.02334
393	2013-08-11	20.85	66.625	99.66	1.5458	0.380313	0	0.0193313	0.00789691	0.0702085	0	1.41694	0.272934	0.499184	1.75235	1.81812
394	2013-08-14	16.2833	64.875	99.735	1.37693	0.377175	0.00747705	0.00847965	0.00891373	0.0614979	0.0124129	0.334979	0.126191	0.153223	1.93498	2.2566
395	2013-08-26	25.9583	66.4167	99.5775	2.52532	1.77961	0.0762312	0.0843218	0.035488	0.21424	0.0408038	5.82482	0.410679	1.88353	1.6723	1.76849
396	2013-08-29	24.4875	78.2917	99.4829	2.74968	0.535716	0.00759267	0.0367634	0.00875606	0.0632302	0.00890879	2.84215	0.45263	0.97487	1.99549
397	2013-09-01	22.2667	87.2917	98.655	2.51878	0.432056	0.00947878	0.0664175	0.00784709	0.012294	0	5.44512	0.732867	1.78394	2.23777	2.25679
398	2013-09-04	20.9625	66.75	99.4929	2.33259	0.968663	0.0344488	0.0562888	0.0174376	0.118107	0.0546536	1.35916	0.40799	0.458638	1.93434	2.09726
399	2013-09-07	21.225	69.25	99.2946	3.27181	0.542442	0.0366937	0.0989652	0.0189256	0.0941553	0	4.71459	0.680152	1.58128	2.08315	2.13691
400	2013-09-10	28.1167	66.7083	99.2525	3.46669	1.12347	0.0640771	0.122725	0.0355005	0.197933	0.0272479	5.56136	0.468861	1.79441	1.72083	1.80445
401	2013-09-13	12.95	64.5417	99.4771	1.33424	0.403026	0.0348645	0.0267802	0.00697341	0.0175437	0.0222668	0.845928	0.581212	0.440151	2.15194	2.2405
402	2013-09-16	13.6167	74.1667	100.233	1.09084	0.185659	0.0048824	0.0498101	0.00739162	0.00692306	0.0126871	0.180556	0.0731296	0.0738195	2.10261	2.42756
403	2013-09-19	20.6708	84.125	99.375	1.42621	1.36272	0.0253804	0.058554	0.00903238	0.0388379	0.00621901	7.29976	2.17546	2.99616	2.04974	2.08012
404	2013-09-22	12.475	61	99.3004	0.751615	0.554267	0	0.00764225	0.00338394	0.000921686	0	0.190961	0.0490917	0.0882202	1.83353	1.87886
405	2013-09-25	14.8208	77.2917	99.2979	2.03146	0.392102	0.0387165	0.0372934	0.0122369	0.0422615	0.0160475	0.99034	1.06366	0.609958	2.47768	2.57409
406	2013-09-28	17.7208	75.6667	99.8254	1.21605	0.746393	0.0158625	0.031509	0.0118854	0.0602196	0	2.72422	1.2634	1.25846	2.03246	2.08746
407	2013-10-01	17.5417	85.2917	99.2871	1.76025	0.118991	0.0763794	0.057179	0.0188671	0.0658672	0.0211581	3.70498	2.28059	1.91134	2.79117	2.48538
408	2013-10-04	22.1292	80.8333	99.3492	2.48088	0.480067	0.0625984	0.0489797	0.0165514	0.0752821	0.0217474	3.56271	1.06092	1.434	2.15335	2.21306
409	2013-10-07	12.1333	74.8333	98.8496	1.07694	0.407668	0.0281042	0.0214137	0.0129283	0.0971849	0.00121729	1.44665	0.337932	0.54986	2.20046	2.33264
410	2013-10-10	13.7833	71.4167	99.9754	1.5072	0.256782	0.0272192	0.0484371	0.0108804	0.0746962	0.00541952	1.05285	0.946592	0.558051	2.27319	2.41319
411	2013-10-13	16.7833	61.4583	100.142	2.01085	0.475241	0.0701661	0.0496095	0.01043	0.077041	0.0560351	1.28715	1.03451	0.73881	2.09764	2.25046
412	2013-10-19	7.08333	85.625	98.7512	0.73911	0.418184	0.0437684	0.0723799	0.0114444	0.0571186	0.255896	2.46901	1.49716	1.37631	2.62656	2.64623
413	2013-10-22	6.25417	58.9167	98.9554	0.769871	0.485602	0.0655965	0.0297979	0.0125345	0.086031	0.0457378	1.58979	0.59798	0.686896	2.21381
414	2013-10-25	4.35833	67.9583	100.101	0.887823	0.660594	0.0105374	0.0159751	0.0145729	0.103449	0	1.10022	0.796247	0.570601	2.5448	2.68049
415	2013-10-28	6.52917	67.5833	100.14	1.78976	0.232473	0.0644581	0.0649719	0.012434	0.0723573	0.0414883	0.99211	0.754491	0.509462	2.7465	2.89233
416	2013-10-31	15.0458	94.875	98.0138	0.654973	0.407871	0.0260054	0.0405805	0.00417913	0.0419087	0.00836887	2.33925	1.16203	1.21732	2.48571	2.55254
417	2013-11-06	11.8542	77.5417	99.2329	0.974832	0.485187	0.0212784	0.0270156	0.00936408	0.0341719	0	1.19241	0.310239	0.470391	2.23148	2.31106
418	2013-11-09	9.22917	61.4583	99.1592	1.14965	0.306273	0.0188152	0.0435442	0.0122711	0.067239	0	1.46913	1.47425	0.909288	2.36391	2.46426
419	2013-11-12	-1.29583	57.8333	100.815	0.46656	0.208193	0.0250827	0.0162583	0.0111002	0.0439885	0	0.328813	0.100276	0.147439	2.46778
420	2013-11-15	6.42917	53.9583	99.4688	2.1776	0.448828	0.0705053	0.0815214	0.0214854	0.138983	0	1.26052	2.24547	0.984421	2.75466
421	2013-11-18	5.87083	59.7083	98.6333	0.760474	0.473921	0.0299433	0.0453791	0.0139655	0.072095	0	1.4357	0.447722	0.604464	2.23218
422	2013-11-21	5.87917	81.4583	100.178	0.545478	0.675471	0.0199428	0.0476898	0.00945448	0.0582121	0.0205145	1.33861	1.61639	0.993083	2.51809	2.60581
423	2013-11-27	-3.40417	57.375	99.2483	0.60314	0.277038	0.0475615	0.0262056	0.0181172	0.0825999	0.00107151	0.605214	0.311271	0.296149	2.7146
424	2013-11-30	1.09583	69.4167	100.391	0.553916	0.336021	0.0610493	0.100619	0.0120917	0.0539042	0.0879604	2.85864	5.98145	2.76732	2.65708	2.75224
425	2013-12-03	1.47917	85.2917	98.9425	1.33381	0.111847	0.072697	0.0381682	0.0106039	0.0628861	0.0865151	1.53491	2.43598	1.26628	3.26661	3.33271
426	2013-12-06	-1.65	56.2917	100.082	0.777865	0.337188	0.0182173	0.0357548	0.0191575	0.0999246	0.0273525	1.407	1.69944	0.979155	2.74441
427	2013-12-09	-2.33333	76.875	99.2562	0.0605407	0.148902	0.0379093	0.0623781	0.0101571	0.0500252	0.0972585	4.38261	4.38315	2.86686	2.1901	2.31804
428	2013-12-12	-10.2783	70.1304	100.397	0.0932651	0.381608	0.202348	0.0587452	0.0166512	0.092434	0.379218	2.12719	2.80728	1.58276	2.11263
429	2013-12-15	-5.825	84.8333	98.8312	0.07185	0.277912	0.0477701	0.0694275	0.0118767	0.0381766	0.0879659	2.35324	2.7087	1.67507	2.33578	2.61216
430	2013-12-18	-3.94167	84.2083	99.4283	0.321764	0.327648	0.0549525	0.0795008	0.0262243	0.0692576	0.4352	2.64261	6.80371	2.95176	2.88476	2.82028
431	2013-12-21	1.01667	99	98.5879	0.754177	0.321211	0.0130323	0.034965	0.00574933	0.0196336	0.015298	1.13549	1.82001	1.0277	3.98289	4.02999
432	2013-12-30	-6.90417	62.9167	99.8596	0.00931425	0.231132	0.0798674	0.0657755	0.0203752	0.0258846	0.14383	2.08498	2.43294	1.50773	2.07587	2.3249
433	2014-01-02	-11.1583	85.2083	99.7387	0.247049	0.429302	0.0732352	0.0424396	0.0112462	0.0240701	0.0535286	0.795022	0.479378	0.419081	3.01108
434	2014-01-17	-2.55	80.75	98.5075	0.282056	0.562305	0.0505287	0.0450109	0.00887509	0.0357105	0.0971958	2.0719	3.17336	1.70758	2.60043	2.702
435	2014-01-20	-4.53333	76.5833	98.6054	0.381189	0.78578	0.0695648	0.0523683	0.0269024	0.0891231	0.175546	1.00648	2.10845	0.948474	2.65206	2.87575
436	2014-01-23	-12.1958	80.3333	100.06	0.135747	0.521497	0.0859009	0.0744296	0.0142417	0.034896	0.149421	1.41396	5.17869	2.03461	2.43024
437	2014-01-26	-10.2333	81.75	97.9346	0	0.854859	0.0544479	0.0397846	0.0089071	0.0172188	0.16855	0.914995	2.31214	1.03151	1.60085
438	2014-01-29	-13.8708	59.0417	99.7846	0.00698165	0.858904	0.104245	0.0560484	0.0146571	0.0630921	0.119466	2.06438	3.22806	1.63679	1.10586
439	2014-02-01	-0.4875	99.25	99.2029	0.137382	0.416757	0.0148374	0.0211282	0.00240257	0.00687933	0.0248153	0.130996	0.6566	0.272108	3.12696	3.27126
440	2014-02-04	-8.30833	83.8333	100.519	0.497645	0.663555	0.0623273	0.105189	0.00710347	0.0262237	0.188103	2.65638	8.0047	3.30332	3.27648	3.33191
441	2014-02-07	-15.6917	65.9583	100.357	0.00995115	0.525748	0.1055	0.0716831	0.0122205	0.0225573	0.134885	2.15998	6.82261	2.67645	1.37699
442	2014-02-10	-8.38333	73.3333	100.153	0.259667	0.536625	0.0904617	0.077052	0.00876418	0.0191595	0.0381647	2.07236	4.54577	2.09114	2.73707	3.01253
443	2014-02-13	-8.4625	73.2083	98.8704	0.0617979	1.15741	0.196836	0.110479	0.0189628	0.114373	0.167474	3.94978	6.08649	3.18262	1.57384	2.05156
444	2014-02-22	1.6375	58.625	98.9217	0.32529	1.22714	0.0795591	0.0564119	0.0126653	0.0479979	0.135622	2.04498	1.02382	1.02281	1.98974
445	2014-02-25	-7.2125	64.625	99.6092	0.203979	1.04681	0.187915	0.0954453	0.0318357	0.096825	0.250811	1.92154	1.69966	1.08875	1.67633	2.22924
446	2014-02-28	-12.5167	54.6667	100.163	0.222844	1.50813	0.122176	0.0644952	0.0143096	0.0495615	0.0680536	1.65364	1.34418	0.933656	0.863802
447	2014-03-03	-14.8625	59.6667	100.709	0.205528	2.18884	0.207398	0.0473236	0.0358063	0.0340512	0.181897	1.49669	1.51843	0.878417	0.81076
448	2014-03-06	-9.375	73.0833	100.596	0.28376	1.2309	0.105569	0.0458104	0.0154871	0.0262771	0.12342	1.70257	3.00521	1.53766	2.25728	2.63427
449	2014-03-09	-2.4125	70.6667	99.6025	0.426577	1.67537	0.0692901	0.0793488	0.0145214	0.0211036	0.18094	3.25255	3.87162	2.39488	2.30283	2.36107
450	2014-03-12	-4.79167	84.125	98.3717	0.503039	0.643908	0.0467344	0.00801318	0.00753973	0	0	1.17599	0.226924	0.462913	2.93514	3.02221
451	2014-03-15	2.38333	62.7083	99.2387	0.959013	0.626921	0.0324055	0.0246087	0.0103091	0.0138938	0.0168671	1.15395	1.08003	0.719434	2.67021	2.73604
452	2014-03-18	0.383333	77.7083	99.2808	0.710769	0.509317	0.0212804	0.0431428	0.0102542	0.0135441	0.0036913	1.79909	4.2733	1.913	2.90313	2.95586
453	2014-03-21	0.433333	70.0833	99.2862	0.947004	1.00504	0	0.0294852	0.0103769	0.029029	0.0276755	1.81548	2.81146	1.53627	2.87578	2.91033
454	2014-03-24	-3.92083	50.7083	100.091	0.722862	1.49026	0.0471388	0.0417582	0.0303136	0.123143	0	2.00164	1.22369	0.960093	2.23824
455	2014-03-27	1.65	70	99.2517	1.17963	1.86478	0	0.0364633	0.0108007	0.0282037	0	1.7145	3.00565	1.5583	2.8344	2.87715
456	2014-03-30	2.3625	54.5417	99.7887	1.24913	1.45121	0.0456295	0.0218142	0.013859	0.0582981	0.00305059	1.06626	0.490475	0.50137	2.61978
457	2014-04-02	5.99583	54.4583	99.7704	1.89441	1.01117	0.0257317	0.0280693	0.0281412	0.127819	0	1.46668	2.29801	1.09206	2.69529
458	2014-04-05	3.96667	55.9583	99.445	1.06855	1.28225	0	0.0347365	0.0174751	0.0849802	0	1.24092	0.446736	0.535832	2.45303
459	2014-04-11	11.1417	61.875	99.2913	3.21275	1.406	0.0241337	0.0495636	0.029331	0.177454	0	1.08589	2.2792	0.920827	2.75966	2.89307
460	2014-04-17	7.58333	61.7917	100.368	0.762272	0.520165	0.016704	0.0318838	0.0121511	0.043265	0	1.80028	0.668648	0.81891	2.18764	2.27269
461	2014-04-20	11.4625	55.625	100.147	1.70008	1.71774	0	0.0481634	0.0117951	0.040077	0	3.47039	1.61098	1.76916	2.28238
462	2014-04-23	6.61667	56.4167	99.5138	1.27876	0.307122	0.0488092	0.0159627	0.0124285	0.0539806	0	0.757063	0.44463	0.412281	2.44585
463	2014-04-26	8.15	69.75	99.0596	1.91692	1.73483	0.101906	0.0357157	0.00681786	0.013066	0	1.31715	1.95603	1.06153	2.7465	2.81135
464	2014-04-29	14.2292	85.7917	98.2783	3.2882	1.66507	0	0	0	0	0.00650538	1.49041	1.60377	0.823064	2.87496	2.87613
465	2014-05-02	10.4375	75.4167	98.5671	1.41705	1.07526	0.000529586	0.00298089	0.00381562	0	0.000175044	2.20372	1.23157	0.979054	2.45246	2.46018
466	2014-05-05	7.88333	73.2917	99.4825	1.95336	0.635167	0	0.000515946	0.00626617	0.0182049	0.000556674	0.46095	0.751653	0.298818	2.84897	2.88006
467	2014-05-08	18.7083	74.625	99.1854	3.66842	1.84259	0.0126972	0.0234224	0.0149628	0.0907463	0	2.78735	1.76362	1.36507	2.46281	2.50803
468	2014-05-11	17.4042	54	99.4513	4.41704	1.07145	0.0401228	0.0805531	0.0150452	0.0552591	0	1.73993	2.05698	1.08434	2.39782
469	2014-05-14	13.5	90.875	99.5588	1.4115	0.692213	0	0.00293985	0.00397194	0	0.00261389	0.789641	0.761769	0.502199	2.72118	2.72903
470	2014-05-17	9.85417	64.8333	99.6371	1.20991	0.537159	0	0.0304275	0.00830215	0.0137893	0	0.844359	0.808206	0.48047	2.35316	2.40697
471	2014-05-20	15.925	70.125	99.3988	1.56675	1.3513	0	0.0193704	0.00827055	0.0156054	0	2.36408	0.599448	1.00692	2.1217	2.1429
472	2014-05-23	14.725	68.2917	99.6692	1.28196	0.71933	0	0.0162439	0.0115611	0.0680473	0.00373971	0.590024	0.315314	0.271733	2.05984	2.2322
473	2014-05-26	22.9583	57.5833	99.4071	2.63828	0.733198	0.00591041	0.0424112	0.0226081	0.120554	0	2.61794	0.74386	1.11511	1.80254
474	2014-05-29	16.4875	73.9583	99.7654	2.4973	0.451134	0	0.00666977	0.0065414	0.00566025	0	1.37884	0.882426	0.729768	2.38111	2.3951
475	2014-06-01	20.6792	58.625	99.7433	2.12129	0.749587	0.0128593	0.0385563	0.0129033	0.0406813	0.00594218	2.23324	0.358154	0.837525	1.81323
476	2014-06-04	17.2417	83.1667	98.9546	2.70224	0.940529	0.0243776	0.0333208	0.00839651	0.067001	0	0.73803	0.873333	0.471466	2.60071	2.70852
477	2014-06-07	20.5958	60.875	99.3175	3.01799	3.26043	0.100327	0.118103	0.129945	1.03332	0.0948606	2.24839	2.15387	1.08374	2.08789	2.74048
478	2014-06-10	19.675	67.25	99.1367	3.55885	0.732652	0.0544449	0.0204519	0.012676	0.0810834	0	1.62254	0.64229	0.723732	2.22879	2.32397
479	2014-06-13	18.5708	62.0417	98.8692	2.40147	0.34343	0.691312	0.0169567	0.0111264	0.0885774	0	1.01283	0.413391	0.437996	2.02755
480	2014-06-16	26.4167	57.8333	99.3933	3.35809	0.768426	0.0952105	0.0517296	0.0254335	0.165782	0	2.23868	0.525665	0.808265	1.71224
481	2014-06-19	20.2917	85.4167	99.6458	2.62738	0.358595	0	0	0.00268298	0.0226016	0	0.52458	3.26069	1.14656	2.6057	2.62511
482	2014-06-22	21.5083	64.4583	99.1658	2.56155	0.410095	0.00613556	0.0282766	0.00603951	0.0497857	0	0.609123	0.286438	0.249535	1.9229	2.04101
483	2014-06-25	21.4875	83.75	99.1225	2.54211	0.536368	0.01189	0.0304396	0.00690628	0.0420615	0	1.96845	1.43585	1.04198	2.31498	2.35475
484	2014-06-28	25.2375	69.5417	99.6883	1.84354	1.01237	0.00628341	0.0509295	0.0115843	0.0626415	0	5.19671	0.631496	1.79047	1.63086	1.66255
485	2014-07-01	25.0542	71.4167	98.4033	2.22902	0.573225	0.0327193	0.0497075	0.0313561	0.0823003	0	1.61813	0.246249	0.483451	1.75165	1.87226
486	2014-07-04	18.5708	61.8333	100.133	1.78919	0.469494	0	0.166231	0.0230516	0.0685954	0	0.508518	0.396457	0.20211	1.88885	2.55403
487	2014-07-10	20.1042	72.625	99.7367	1.85568	0.454009	0.0575719	0.0567624	0.0117151	0.0658533	0.0325921	1.42935	0.388902	0.554658	1.97121	2.09181
488	2014-07-13	24.875	70.2917	98.8471	1.85123	0.349645	0.0479857	0.0689495	0.0104735	0.056435	0	2.897	0.462688	1.05979	1.68421	1.74404
489	2014-07-16	16.45	68.3333	99.1342	1.11385	0.177433	0.0129505	0.0140433	0.011985	0.094575	0	0.236633	0.154109	0.104636	1.87332	3.30169
490	2014-07-19	18.9333	88.4583	99.64	1.39886	0.935528	0.0406835	0.0492462	0.0197255	0.140712	0	7.6283	0.426419	2.40973	2.04159	2.13983
491	2014-07-22	25.2542	66.875	99.4542	1.55011	0.48105	0.0253987	0.0329116	0.00157922	0.0245404	0	2.31106	0.533241	0.963883	1.5727	1.60087
492	2014-07-25	19.5458	63.0417	99.4262	1.93704	1.00032	0.0316171	0.0276776	0.0191205	0.118506	0	2.24756	0.480171	0.798372	1.87779	1.97871
493	2014-07-28	17.25	73.0833	98.8771	1.11735	0.580513	0.0510668	0.00864244	0.00422099	0.0425547	0	0.968384	0.118569	0.34691	1.89532
494	2014-07-31	19.35	74.4167	99.3867	2.55365	0.995121	0.0480445	0.0801513	0.0263478	0.16232	0.00639031	2.06144	0.506131	0.750239	2.18508	2.3429
495	2014-08-03	21.0792	79.2083	99.6604	2.15711	1.4141	0.00339864	0.122099	0.0069314	0.0387666	0	4.3057	2.08163	2.08265	2.17994	2.21462
496	2014-08-09	20.575	74.375	99.7442	2.06642	0.516875	0.00822347	0.0389748	0.00188343	0.018117	0	0.89764	0.399709	0.450173	2.04252	2.08732
497	2014-08-12	19.7333	89.75	98.4142	0.722289	0.442303	0.0165749	0.0524456	0.00783532	0.0376661	0	4.15234	0.902039	1.64351	1.97849	2.03034
498	2014-08-15	16.8833	59.2083	99.3483	1.58355	0.426958	0.0713453	0.0695064	0.0188676	0.125039	0.0301457	0.758198	0.273657	0.297228	1.89295
499	2014-08-21	22.0333	87.4583	99.2329	1.99348	0.784599	0.0144744	0.0317056	0.00953585	0.0859008	0	2.60228	0.548251	0.992296	2.21253	2.27371
500	2014-08-24	21.55	87.2917	99.6258	0.785575	0.296483	0	0.0143675	8.7594e-05	0.00964205	0	2.85857	0.334882	1.29681	1.92441	1.93261
501	2014-08-27	21.0458	77.4583	99.6517	1.55618	0.306383	0	0.00774716	0.00265872	0.0268736	0	1.19726	0.292102	0.453576	1.91986	1.9455
502	2014-09-02	21.1375	87.25	98.9313	1.93397	0.760209	0.0263961	0.0318924	0.00784066	0.0486645	0	1.9312	0.42952	0.681842	2.75156	2.28956
503	2014-09-05	25.9333	79.4167	99.2117	2.58407	0.872411	0.0685381	0.0423061	0.0194545	0.104179	0.00562402	4.42555	0.762654	1.48433	1.90487	1.96773
504	2014-09-08	17.825	76.8333	99.8317	1.39177	0.527508	0.00459571	0.0201135	0.00446664	0.0391977	0	0.886115	0.204065	0.327442	2.03064	2.0954
505	2014-09-11	14.7333	77.1667	99.2454	0.823048	0.759789	0.0198769	0.0131917	0.00370709	0.0364725	0.00930489	0.330494	0.0704677	0.127116	1.98277	2.20499
506	2014-09-14	10.625	76.7917	100.293	0.695363	0.761565	0.0337053	0.0645064	0.00633289	0.0419169	0.0196878	1.66339	0.450632	0.659054	2.12823	2.22465
507	2014-09-17	12.7542	70.25	99.4062	1.72469	0.354488	0.0237411	0.0469342	0.0225374	0.149259	0.00782078	1.33021	0.763586	0.620368	2.35833	2.54689
508	2014-09-20	17.8333	80.2083	99.0312	1.3822	0.982736	0.0259399	0.0470293	0.00986608	0.0602128	0	3.17003	0.864098	1.24977	2.1018	2.15871
509	2014-09-26	15.9292	85.3333	100.29	1.80653	0.551809	0.0137827	0.0395299	0.0103914	0.0474396	0	1.37658	1.31347	0.852122	2.94298	2.59938
510	2014-09-29	17.5375	80.4167	99.2267	1.56329	0.812044	0.0405773	0.0718556	0.0188526	0.1082	0.0066381	3.65841	2.27315	1.96374	2.28759	2.36081
511	2014-10-02	16.4083	87.125	99.2271	2.10502	0.426322	0.00481333	0.0488812	0.0072995	0.0310624	0	3.88526	2.68435	2.26548	2.62714	2.65006
512	2014-10-05	9.0375	64.5	98.3883	0.944828	0.130416	0.75339	0.0244337	0.00569515	0.0150086	0.000355112	1.0003	0.239923	0.446328	2.18984
513	2014-10-11	7.99583	68.5	99.9954	1.52266	0.225098	0	0.0616503	0.00933366	0.0437772	0	0.519591	0.522218	0.27854	2.60084	2.74609
514	2014-10-14	18.4958	82.875	98.3342	1.14901	0.38401	0	0	0.000765939	0.00751221	0	1.2383	0.195395	0.433087	2.01766	2.02402
515	2014-10-17	13.9833	79.875	97.9704	0.963206	0.249828	0	0.00738898	0.0101376	0.0755765	0	3.2869	1.01836	1.35826	2.16116	2.213
516	2014-10-20	11.225	77.7083	98.8442	1.83492	0.207994	0.0293786	0.0492567	0.0131043	0.0704353	0.014532	2.61548	1.30247	1.2477	2.59919	2.65878
517	2014-10-23	7.60833	78.8333	99.9613	1.07827	0.245259	0.00420999	0.0385623	0.0187508	0.0998509	0.010578	0.790408	1.36285	0.589941	2.67856	2.80511
518	2014-10-26	9.99583	52.625	98.9925	1.68567	0.14008	0.0165473	0.0691244	0.0150646	0.0750371	0.0100972	0.299133	0.23978	0.0975022	2.23213
519	2014-10-29	8.35833	69.5	99.2404	1.68938	0.182379	0.0230012	0.0471233	0.020181	0.10705	0.0108608	1.38472	0.439381	0.601658	2.5716	2.71099
520	2014-11-01	2.4	66.2917	100.127	0.605864	0.0739367	0.0150767	0.0111047	0.00589802	0.00337042	0.000304418	0.540951	0.127094	0.21869	2.39434	2.4522
521	2014-11-07	2.80833	63.75	99.4571	0.682427	0.187331	0	0.0172604	0.0108897	0.0711084	0.00168107	0.379955	0.355756	0.20613	2.49865	2.73544
522	2014-11-10	8.375	67.7917	98.8825	2.4974	0.372897	0	0.0372283	0.0169015	0.121029	0	1.45443	1.93958	1.06082	2.85095	2.93511
523	2014-11-13	-1.05833	72	99.8742	0.542174	0.574113	0.0506182	0.0447525	0.0119745	0.0647716	0.0493613	1.18994	2.9127	1.25483	2.74511	2.87345
524	2014-11-16	-0.483333	74	99.6154	0.566296	0.337309	0.0240607	0.0702255	0.0127219	0.0495104	0.159609	3.16089	8.55209	3.64163	2.82423	2.85377
525	2014-11-19	-5.27917	76.2917	99.05	0.438946	0.165194	0.0246311	0.0642161	0.0115691	0.0373283	0.120383	2.17864	3.46929	1.84176	3.05032	3.09966
526	2014-11-22	1.775	83.25	99.6088	1.19171	0.285118	0.0502675	0.0852675	0.0104997	0.0270009	0.170786	2.08488	4.28272	2.01221	3.16085	3.18466
527	2014-11-28	-4.48333	66.0417	100.175	0.306911	0.168719	0.0116647	0.0262316	0.0115299	0.0451236	0	1.32057	1.58513	0.91546	2.62389	2.77286
528	2014-12-01	-0.7625	62.6667	100.708	0.69865	0.104441	0.0503691	0.0501016	0.00808632	0.0179821	0.0205337	0.924768	0.444673	0.477397	2.69309	2.81369
529	2014-12-07	-1.54167	70.4583	101.38	1.17816	0.355128	0.0688006	0.0217559	0.00190422	0.0335732	0	0.83517	0.415764	0.399444	3.07466	3.18148
530	2014-12-10	-1.6625	76.75	100.016	0.448702	0.0954026	0.0416064	0.0260038	0.0066955	0.0332758	0	2.1113	0.310801	0.805141	2.59372	2.69717
531	2014-12-13	3.30833	87.5833	99.6688	1.06026	0.126045	0	0.0523365	0.00181616	0.0375172	0.007256	3.04514	5.84811	2.99578	3.18187	3.21118
532	2014-12-19	-2.75417	76.3333	100.172	0.62952	0.113067	0.0532976	0.0413551	0.018201	0.0773323	0.00024235	1.19691	1.22335	0.769804	2.99269	3.15657
533	2014-12-22	-0.875	87	99.4517	0.612855	0.0783044	0.0153227	0.0834114	0.00352966	0.0479407	0.104789	4.89088	6.81918	3.97556	3.20635	3.23952
534	2014-12-25	3.075	81.9167	98.8863	0.188712	0.0249262	0	0.0359667	0.00159369	0.0323661	0	2.22763	0.651551	0.999261	2.21489	2.29519
535	2014-12-28	1.55	73.4583	99.5742	0.29677	0.182163	0.0144717	0.043339	0.0157332	0.106053	0.0667336	1.88963	1.19881	0.929355	2.25009	2.41647
536	2014-12-31	-7.84167	57.9583	100.373	0.722768	0.144527	0	0.0452493	0.00410256	0.0147655	0.0117143	1.18348	0.659316	0.577807	3.0572
537	2015-01-03	-0.570833	94.125	99.385	0.635929	0.134201	0.00385137	0.0602801	0.00259518	0.0410546	0.0388969	1.06682	4.52221	1.79984	3.4453	3.49273
538	2015-01-06	-10.9333	73.9583	99.9996	0.109461	0.19728	0.0920438	0.0802756	0.00801276	0.0451489	0.0541879	2.32529	2.3409	1.55083	2.59556
539	2015-01-09	-10.775	75.1667	99.3863	0.112492	0.184915	0.0955988	0.0857755	0.0312677	1.5422	0.209691	2.08316	1.54782	1.01133	1.57848
540	2015-01-15	-9.17391	77.0435	99.4796	0.220652	0.518513	0.131631	0.129528	0.0150215	0.0376387	0.410596	3.94082	11.3074	4.4567	1.78881	1.73133
541	2015-01-18	2.44167	81.9583	98.3988	0.696902	0.278916	0.0186436	0.0430277	0.00666525	0.0137391	0.11905	1.79417	2.6664	1.37633	2.8074	2.80932
542	2015-01-21	-5.07083	87.3333	99.5429	0.258597	0.260412	0.072136	0.0365652	0.0108633	0.0113957	0.132021	2.36972	6.75271	2.72221	2.65157	2.74805
543	2015-01-24	-1.65833	85.5833	98.1708	0.139807	0.0739787	0.051562	0.0945463	0.0136641	0.0188484	1.21504	3.89935	6.8687	3.73996	2.97027	2.06787
544	2015-01-30	-8.73333	62.5	100.434	0.453819	0.140345	0.131932	0.00884906	0.00639672	0.0234255	0.129598	0.500797	0.350504	0.20966	2.9457	3.16026
545	2015-02-02	-10.0167	69.5833	99.0683	0.157337	0.236597	0.145545	0.0218827	0.0148066	0.0214153	0.0412205	0.76728	0.532449	0.340622	2.18201
546	2015-02-05	-12.1958	62.0833	100.418	0.849578	0.362581	0.0597195	0.0739611	0.00973592	0.0395169	0.230237	2.19478	5.292	2.59076	3.70313
547	2015-02-08	0.245833	88.2083	98.3946	0.850168	0.481734	0.0733638	0.0703042	0.00732221	0.0391148	0.241522	2.07908	5.01922	2.42844	3.28217	3.30175
548	2015-02-11	-4.3375	86.875	99.2387	0.0262166	0.131185	0.0520699	0.0774309	0.00542297	0.0251299	0.206884	4.08762	5.67379	3.24568	2.53049	2.53155
549	2015-02-14	-9.58333	71.4167	98.725	0.0689986	0.0735804	0.214748	0.0477992	0.0545945	0.0412095	0.281178	1.26714	2.02483	1.05825	2.50178	3.03962
550	2015-02-17	-12.5125	75.4583	98.9792	0.232203	0.496399	0.265029	0.0985306	0.0382676	0.0776316	0.306065	1.9753	6.04423	2.38276	2.38436
551	2015-02-20	-17.3792	57.7917	100.317	0.185986	0.50163	0.372041	0.0663562	0.0377819	0.0874035	0.435122	1.2577	1.74041	0.950694	2.22004
552	2015-02-23	-16.5833	56.125	101.145	0.0727935	0.303436	0.24743	0.0393521	0.0251977	0.0695306	0.210015	1.59025	1.02209	0.86859	1.10115
553	2015-02-26	-12.3458	67.1667	99.8525	0.479616	0.306022	0.326122	0.0309694	0.0306615	0.0371026	0.345841	1.32048	0.946085	0.769242	3.31051
554	2015-03-01	-7.89583	84.3333	100.463	0	0.325451	0.151793	0.184429	0.0573078	0.0522422	0.771304	4.46393	5.89695	3.53367	2.61418	2.33846
555	2015-03-04	-1.16667	59.3333	99.1325	0.278988	0.271867	0.0823272	0.0431256	0.0157584	0.0452745	0	2.28514	3.56689	1.85077	2.36997
556	2015-03-07	-2.56667	72.375	99.4842	0.454468	0.689274	0.105288	0.134671	0.0192082	0.0739649	0.16156	3.09606	9.39593	3.81459	2.66118	2.85448
557	2015-03-10	1.72917	88.625	99.47	0.685812	0.478413	0.0835642	0.189846	0.0206663	0.0899554	0.345959	3.9333	16.7882	6.32038	3.01199	3.0819
558	2015-03-13	1.80833	74.9167	100.109	1.1959	0.608581	0.065678	0.0401105	0.021042	0.0978045	0.0489724	1.10166	2.51735	1.0594	2.98985	3.10791
559	2015-03-16	8.82917	76.6667	98.8721	3.84144	0.321818	0.159529	0.078487	0.0333364	0.211099	0.0431827	1.20544	2.89424	0.9978	3.14099	3.3153
560	2015-03-19	-0.670833	65.8333	100.278	1.10652	0.600505	0.0298759	0.0138249	0.0137141	0.0584718	0	0.565912	0.838493	0.403213	2.99224	3.12627
561	2015-03-25	4.43333	83.125	99.1654	0.990501	0.380703	0.0715735	0.087365	0.0164775	0.0692583	0.0977251	3.80874	5.04805	2.83915	2.86853	2.94252
562	2015-03-28	-4.3125	58.2083	100.132	0.508547	0.431404	0.0462128	0.0344513	0.0130368	0.0498218	0	0.898676	0.769863	0.511789	2.66206
563	2015-03-31	2.15417	86.9583	98.8767	0.719109	0.137274	0.00823879	0.0177326	0.00779761	0.0328188	0	0.941267	1.0914	0.662723	2.97665	3.03719
564	2015-04-03	7.00417	85.7083	98.8312	1.53597	0.290552	0.0378409	0.0429067	0.00900642	0.0483286	0.040883	1.1809	2.26345	0.988371	2.9904	3.04695
565	2015-04-06	6.5625	77.6667	99.5996	1.55826	0.235561	0.0723305	0.0622095	0.020747	0.120833	0.0500854	1.64487	4.29075	1.70294	2.89589	2.9929
566	2015-04-09	9.7375	96.3333	98.7987	0.980887	0.352167	0.0544294	0.0481559	0.00654089	0.0130842	0.0326375	1.79456	1.63352	1.03342	3.01439	3.07776
567	2015-04-15	9.5125	55	100.404	2.35262	0.944397	0.237469	0.10751	0.0210687	0.0890381	0.26888	0.543768	0.797724	0.365213	2.63052
568	2015-04-18	12.9292	57.9167	99.5717	2.45194	0.48765	0.143847	0.0909186	0.0157749	0.0819993	0.127111	1.7571	2.98001	1.39356	2.49725
569	2015-04-21	7.61667	61.625	97.9771	1.41286	0.248426	0.0787615	0.0566032	0.0161065	0.0904238	0.0699112	1.6499	0.888502	0.751826	2.45985	2.60313
570	2015-04-24	4.70833	55.9583	99.4767	1.54087	0.634612	0.0540351	0.068461	0.0210758	0.112323	0.00287938	0.973362	1.85854	0.707763	2.6966
571	2015-04-27	6.675	69.6667	99.3025	1.44984	0.215288	0.0388498	0.025576	0.010245	0.0477133	0.0291345	1.00792	0.242356	0.37277	2.58293	2.68964
572	2015-07-29	25.1	79.25	99.11	2.8083	1.31154	0.0242955	0.0509932	0.01755	0.0879993	0	3.24043	0.309104	0.983147	1.97331	2.03002
573	2015-08-01	23.1167	52.2083	98.9779	2.03712	0.499597	0.0226592	0.0483015	0.0233733	0.12829	0	0.674447	0.115369	0.212336	1.59153
574	2015-08-04	21.2542	60.7917	99.0438	2.23621	0.871637	0.0361538	0.0416459	0.0718142	0.150077	0.0258888	0.796699	0.242654	0.217936	1.81638	2.56289
575	2015-08-07	20.4	71.0833	99.1671	2.23319	0.47119	0.012058	0.0499063	0.00912928	0.0516063	0	1.07241	0.209938	0.346305	1.9974	2.08605
576	2015-08-10	21.8667	89.125	98.8421	1.80454	0.584274	0.0427857	0.0442514	0.00145428	0.0441475	0.0246635	2.55668	0.716596	1.00717	2.23675	2.28678
577	2015-08-13	22.3292	68.2917	99.5404	2.53086	0.94353	0.0378114	0.0353274	0.0153086	0.111964	0.00432419	1.76588	0.243285	0.541905	1.90634	2.01592
578	2015-08-16	24.2292	78.6667	99.6937	1.90777	0.42167	0.0483133	0.0499252	0.00337683	0.0517684	0.0182056	2.34862	0.822101	0.915071	1.87902	1.93573
579	2015-08-19	24.425	84.5833	98.6221	1.63136	0.74543	0.031286	0.0212309	0	0.0231858	0.00395061	2.66142	0.346993	0.878476	1.88919	1.91713
580	2015-08-22	19.2667	72.8333	99.8121	1.52082	0.678994	0.0229177	0.032284	0	0.0301505	0	1.15744	0.391958	0.438738	1.93081	1.98577
581	2015-09-03	22.3417	88.1667	99.1713	2.83713	1.31628	0.0333205	0.0597928	0.0046838	0.0658126	0	3.01093	0.776542	1.1255	2.37702	2.42661
582	2015-09-06	24.2042	82.0833	99.655	2.00061	0.960152	0.0476798	0.0551337	0.0100815	0.0586247	0	3.78411	1.9275	1.71998	2.02314	2.07211
583	2015-09-09	21.8958	78.4583	99.0658	1.86306	0.283593	0.00994266	0.0140531	0.0026374	0.0397431	0	1.0578	0.218025	0.348349	1.95985	2.00961
584	2015-09-12	14.1783	70.4783	99.037	1.2475	0.108663	0.0120242	0.00414723	0	0.0123322	0	0.382219	0.101921	0.135669	2.06589	2.11881
585	2015-09-15	19.6708	69.2083	100.245	2.29955	0.589551	0.0489898	0.0259428	0.00898714	0.0987021	0.00311484	2.22686	0.552882	0.797319	2.02953	2.11182
586	2015-09-18	20.5125	80.3333	98.9983	2.25497	0.635561	0.0327132	0.0412544	0.00915194	0.0591383	0.0197765	2.50705	0.692264	0.934101	2.17065	2.2238
587	2015-09-21	15.75	74.2083	99.8721	1.99117	0.495157	0.00892343	0.0248446	0.005112	0.0434454	0.0253883	0.314801	0.229475	0.125632	2.2753	2.51106
588	2015-09-24	18.4208	77.6667	100.303	2.88717	0.827668	0.0071361	0.0260927	0.00647386	0.0542058	0.0197804	2.49177	0.316754	0.896829	2.33995	2.37297
589	2015-09-27	18.6625	76.75	99.935	1.7158	0.204554	0.0474282	0.0285128	0.00656192	0.0180771	0.018078	0.753371	1.86253	0.718623	2.21694	2.32045
590	2015-09-30	14.1917	67.75	99.7004	1.48132	0.111358	0	0.00658489	0.0039729	0.034235	0.0184041	0.24462	0.104427	0.0824896	3.11135	2.28839
591	2015-10-03	8.9125	76.0833	100.139	1.32708	0.255979	0.0587342	0.0222708	0.00333941	0.0346908	0.0427959	0.252805	0.137923	0.103182	2.53883	2.90223
592	2015-10-06	15.0375	90.9583	99.7083	1.11476	0.0155116	0.0182406	0.0440036	0.00843818	0.0545329	0.0245754	5.23606	1.89162	2.23744	2.4344	2.47776
593	2015-10-15	11.3261	63.9565	99.1391	1.4862	0.158748	0.0265208	0.0622503	0.0265007	0.285486	0.0971243	2.12074	0.442493	0.740624	2.20657	2.45631
594	2015-10-18	4.15833	60.4167	100.668	0.156925	0.00415853	0	0.00530839	0.00190801	0.0514591	0.0177172	0.157815	0.125248	0.0386884	1.53794	2.16648
595	2015-10-21	16.5583	55.3333	99.8546	3.40881	0.277457	0.0729508	0.0971959	0.0263436	0.140069	0.0230517	1.89101	0.876817	0.775813	2.22798
596	2015-10-24	15.1875	81.625	99.0362	2.07235	0.120821	0.044251	0.0497992	0.00320195	0.0350915	0.0411628	1.23069	0.707078	0.605962	2.49535	2.57078
597	2015-10-27	10.0583	78.9583	100.304	1.6297	0.134432	0.0171609	0.0241234	0.00438119	0.0668571	0.0385161	0.769158	0.674036	0.409887	2.66222	2.7576
598	2015-10-30	7.72917	79.3333	99.5533	1.02304	0	0.0235972	0.030814	0.018295	0.181855	0	1.04072	0.39843	0.433779	2.52929	2.82189
599	2015-11-02	10.5708	78.7083	99.4671	1.69145	0.231701	0.0412878	0	0.0108939	0.0688221	0.0309697	0.881069	1.05162	0.516994	2.67149	2.76343
600	2015-11-05	17.0792	83.7917	99.5083	2.21085	0.338732	0.0377645	0.0434163	0.00642034	0.0543031	0.0280219	1.37119	2.53553	1.1463	2.58018
601	2015-11-08	4.25	71.75	100.655	1.20249	0.198459	0.0269072	0.0832011	0.00428601	0.0415267	0.0400993	1.40838	1.5869	0.883155	2.78327	2.84806
602	2015-11-11	7.34583	84.2083	99.1654	1.21231	0.20217	0.0181308	0.078279	0.0194847	0.139496	0.128692	2.59856	7.52084	2.82748	2.78584	2.85767
603	2015-11-14	5.62917	64.9167	100.082	1.00322	0.0867707	0.0134282	0.0272649	0.00687608	0.0615783	0.0193338	0.396729	0.596393	0.217276	2.51886	2.72299
604	2015-11-20	3.65833	49.2083	99.8937	0.70562	0.0919677	0.0333025	0.0339647	0.0188337	0.132419	0.0539638	1.07504	0.290849	0.394164	2.16878
605	2015-11-23	-1.65	75.4583	99.6521	0.4344	0.276766	0.0648422	0.0484291	0.0108684	0.0349451	0.10245	1.09805	3.11514	1.20889	2.7136	2.80897
606	2015-11-26	10.8833	67.5417	100.535	1.22477	0.333583	0.0444966	0.0357176	0.0065083	0.0336652	0.0278453	0.817981	0.380551	0.35102	2.24687	2.37727
607	2015-11-29	-1.07917	83.2917	100.493	0.912691	0.29718	0.0165653	0.0400035	0.00246415	0.0302691	0.0325087	1.86494	1.61014	1.08462	3.12027	3.16009
608	2015-12-02	1.78333	90.0833	98.7225	0.830733	0.185297	0.0624879	0.047791	0.00585472	0.0555984	0.109561	1.02634	2.4295	1.01938	3.14287	3.21983
609	2015-12-05	-0.00416667	99.5833	101.444	0.470859	0.574382	0.0525911	0.051692	0.00461128	0	0.107509	1.61426	2.45247	1.28463	3.97326	4.0197
610	2015-12-08	3.62083	94.625	99.3575	0.306872	0.0813803	0.0522949	0.0789963	0.00613351	0.010791	0.106843	3.36092	5.87172	2.80537	2.62395	2.69986
611	2015-12-11	8.525	75.875	98.6021	2.11777	0.041671	0.0577308	0.0557784	0.0203271	0.140878	0.0606207	1.27932	1.35809	0.681645	2.82571	2.96735
612	2015-12-14	12.0333	82.7917	97.6025	0.814822	0.0410266	0.067189	0.0494468	0.0079548	0.0506282	0.0501041	1.51693	0.245312	0.525592	2.19626	2.32628
613	2015-12-17	3.37917	73.0417	98.5829	0.566945	0.0716418	0.0158313	0.0234557	0.0129222	0.102147	0.0223432	1.35642	0.869564	0.607005	2.42422	2.57203
614	2015-12-20	0.645833	65.2917	100.182	0.697481	0.283524	0.0286328	0.0452446	0.00786285	0.0364193	0.020233	1.10566	1.1943	0.669473	2.64909	2.74838
615	2015-12-23	10.0833	94.7083	98.1654	1.15271	0.518616	0.0163538	0.025028	0.00128327	0.0199817	0.020344	0.809497	1.71633	0.766999	3.0085	3.04189
616	2015-12-26	4.10417	92.0417	100.172	0.385841	0.233154	0.0131763	0.0183654	0.000766815	0.0248104	0.0515099	0.643712	1.70383	0.717133	2.76066	2.79275
617	2016-01-01	-2.47917	73	99.6704	0.214637	0.0249637	0.0202837	0.0557732	0.0106567	0.0212833	0.00568222	3.20786	3.21143	2.00294	2.36449	2.49554
618	2016-01-04	-5.40833	64.4583	100.543	0.498016	0.184287	0.117105	0.0211237	0.0183287	0.021745	0.078748	0.28923	0.247159	0.112609	2.85241	3.25906
619	2016-01-07	0.170833	72.375	99.9513	1.20694	0.128867	0.0547352	0.0800407	0.0161926	0.0696587	0.0365138	0.966718	4.19964	1.3852	3.09956	3.20077
620	2016-01-19	-9.51667	68.25	100.522	0.379965	0.153722	0.188606	0.0598481	0.0184268	0.0716145	0.136965	0.744061	2.44496	0.800532	2.89849	3.32545
621	2016-01-22	-4.42917	78.7083	100.126	0.442117	0.44089	0.0674781	0.0562052	0.0104629	0.0258825	0.0390166	1.53411	5.59646	2.10134	2.86856	3.0133
622	2016-01-25	0.8	75.2083	99.145	0.50748	0.234453	0.0453257	0.0729635	0.0111085	0.0240841	0.0606694	1.75171	5.26665	2.14228	2.73928	2.81044
623	2016-01-28	0.325	76.8333	98.1892	0.927205	0.158216	0.0535124	0.0472604	0.0120026	0.042485	0.186627	2.23183	2.98785	1.5871	2.96684	2.99137
624	2016-01-31	6.05417	88.25	98.0908	1.44436	0.471066	0.0508671	0.0818593	0.00919823	0.00889542	0.0380694	1.51194	2.62253	1.22495	3.05808	3.1083
625	2016-02-03	8.23333	80.0417	98.0467	0.7671	0	0.0294644	0.0401939	0.0076839	0.0424753	0	1.37004	0.698282	0.655098	2.43235	2.52342
626	2016-02-06	-0.275	74.6667	100.076	0.3885	0.213842	0.0359158	0.0626645	0.00975989	0.0445506	0	1.67173	6.09649	2.15289	2.47426	2.62114
627	2016-02-15	-4.72917	89.4583	99.2442	0.108432	0.530034	0.032756	0.0534476	0.00438963	0.0129493	0.0426416	2.72067	2.92073	1.71877	1.76479	1.85904
628	2016-02-18	-5.59167	76.75	100.827	1.02272	0.610716	0.0657608	0.0253166	0.00699526	0.0336852	0	0.577601	1.32247	0.529743	3.39947	3.51216
629	2016-02-21	2.62083	79.9167	99.4571	1.64596	0.482753	0.052422	0.0322154	0.00493138	0.0238056	0	0.574342	0.611137	0.366009	3.16747	3.25382
630	2016-02-24	0.104167	91.4583	97.7904	0.7051	0.269461	0.0641216	0.022953	0.0063059	0.0367133	0.0531387	0.627462	1.52768	0.625727	3.20628	3.30684
631	2016-02-27	1.375	71.7917	99.1683	0.921377	0.321843	0.0621936	0.0622709	0.0150157	0.0544205	0.0345886	1.64119	3.95122	1.51172	2.79488	2.8976
632	2016-03-01	-3.04583	80.7917	98.7829	0.581717	0.276219	0.0483423	0.00915699	0.00751725	0.0238018	0	0.380285	0.41378	0.222637	3.03548	3.17823
633	2016-03-04	-2.9625	83.625	99.8154	0.226229	0.247979	0.067291	0.0456043	0.00626671	0.021925	0.0562446	2.22581	4.77515	2.02028	2.27182	2.44874
634	2016-03-07	7.37917	78	99.275	1.81222	0.331397	0.0515708	0.0427958	0.0118913	0.0597319	0	1.80513	2.63304	1.26104	2.87587	2.94134
635	2016-03-10	9.59167	99.0833	99.3504	1.72618	0.231648	0.024366	0.0373436	0.017876	0.0208469	0.0582419	1.282	2.55889	1.06907	3.84217	3.8851
636	2016-03-13	6.64583	91.25	99.1012	1.23568	0.664684	0.019793	0.0505112	0.00882254	0.037385	0.031228	1.197	2.99252	1.18462	3.02223	3.07308
637	2016-04-15	9.40833	59.25	100.341	1.40708	0.282142	0.0594197	0.0317678	0.013123	0.0627751	0.0357777	1.48466	1.27781	0.841741	2.38566
638	2016-04-18	16.5375	52.8333	100.262	3.22708	0.913067	0.0827385	0.0734136	0.0339687	0.178616	0.0309242	2.00044	1.24507	0.907585	2.21841
639	2016-04-21	12.6167	84.0417	98.9917	5.45697	0.504911	0.0348719	0.053252	0.0151516	0.0815568	0.0962074	1.03588	1.37629	0.790283	3.20523	3.27055
640	2016-04-24	9.2125	52.7083	99.605	6.35697	0.305871	0.0299568	0.0309452	0.0115177	0.0347905	0	0.929293	1.5215	0.757414	3.06907
641	2016-04-27	8.29167	57.25	99.2438	2.84829	0.165352	0.0434819	0.0221656	0.00946022	0.0139061	0	0.964442	0.679066	0.529322	2.72003
642	2016-04-30	8.29167	80.7083	99.6604	3.02129	0.299408	0.0122671	0.0292992	0.00999941	0.0199588	0.00188283	0.588024	2.8712	1.05053	3.1918	3.22339
643	2016-05-03	10.9167	77.0833	98.9117	2.85432	0.332836	0.0262	0.0309146	0.0140286	0.0448375	0.00963333	0.982662	3.65211	1.33349	2.94489	2.98736
644	2016-05-06	14.5792	55.2917	98.9654	2.44865	0.585848	0.0497986	0.0695378	0.0192774	0.0834903	0.0278126	1.43462	0.450847	0.630369	2.19804
645	2016-05-09	10.95	61.125	99.5913	1.96917	0.369764	0.0320283	0.0430084	0.0139733	0.0548461	0.0119018	0.468154	0.234772	0.23206	2.38273	2.69071
646	2016-05-12	16.8792	82.5833	99.1046	2.19813	1.08976	0.0246092	0.0439528	0.0152657	0.0625118	0.0266341	1.30511	1.27117	0.834728	2.51892	2.58992
647	2016-05-15	5.64167	59.5	99.3688	0.63114	0.0321241	0.0179262	0.0340636	0.00886946	0.0210782	0.0235337	0.604012	0.123834	0.267569	2.13347
648	2016-05-18	12.2	53.1667	99.9896	1.41916	0.24641	0.00133859	0.0224381	0.0127209	0.0371008	0	1.27073	0.124137	0.500794	2.03174
649	2016-05-21	16.0083	57.125	99.4225	4.07123	0.631936	0.0163837	0.467757	0.0409225	0.0637577	0	1.74226	1.26366	0.729142	2.40204
650	2016-05-24	20.6625	53.7917	99.3704	3.40554	0.980904	0.0520121	0.0910474	0.0420231	0.175658	0	2.0669	0.977085	0.980999	2.0069
651	2016-05-27	24.075	69.0833	99.2208	3.88146	0.634719	0.0934566	0.14715	0.0232634	0.0851366	0.0383654	2.07672	0.629803	0.765827	2.03594	2.17392
652	2016-05-30	22.5333	61.4167	99.2454	3.67168	0.717056	0.0191022	0.0631333	0.0277035	0.0710887	0	1.08902	0.304448	0.402594	1.99057	2.14036
653	2016-06-05	19.8583	78.25	98.0258	2.44754	0.431287	0.042521	0.06036	0.0201563	0.0623852	0	1.93287	1.06279	0.901323	2.24157	2.32874
654	2016-06-08	15.3833	47.9583	99.0229	1.66411	0.224538	0.00430423	0.0141475	0.0162933	0.0605804	0	0.204028	0.0909707	0.0959641	1.87232
655	2016-06-11	28.2125	57	98.9079	5.85752	1.13311	0.0373588	0.0760093	0.0324889	0.164427	0	1.89741	0.43029	0.689369	1.86166
656	2016-06-14	19.4083	46.6667	99.3413	2.61205	0.374966	0.0181538	0.0155776	0.0120628	0.0469682	0.00236208	0.322597	0.0851353	0.143346	1.84609
657	2016-06-17	22.775	52.5417	99.3738	3.31203	0.627457	0.0208778	0.0302728	0.0183003	0.0877451	0	0.473097	0.141786	0.183685	1.83418
658	2016-06-20	27.5917	60.3333	99.3596	3.7419	0.804255	0.0641155	0.100562	0.038148	0.217329	0.0219916	2.79541	0.367982	0.930763	1.72046	1.87299
659	2016-06-23	20.6875	67.5833	98.9458	3.85722	0.586878	0.0246917	0.0350218	0.0166869	0.0712033	0	1.26554	0.439562	0.561873	2.20243	2.30302
660	2016-06-26	26.1542	69	99.3563	3.33583	0.534484	0.0413181	0.101019	0.0243463	0.0762387	0	2.8795	0.402672	1.02295	1.85519	1.92547
661	2016-06-29	19.5	48.75	99.5179	2.08822	0.500024	0.010957	0.0363892	0.0169281	0.14893	0	0.219367	0.190249	0.0981453	1.76515
662	2016-07-02	18.9042	55.125	99.7542	2.13141	0.716091	0.0164515	0.2213	0.0257295	0.0779837	0	0.751581	0.296866	0.226469	1.85989
663	2016-07-05	25.1792	66.5833	98.8571	2.74972	0.711514	0.0309658	0.57238	0.063131	0.175361	0.00149614	2.67089	0.8223	0.744412	1.75606	2.07134
664	2016-07-08	23.9625	80.125	98.6213	2.89146	1.03328	0.0203579	0.0341931	0.00622051	0.0641342	0	1.66455	0.264842	0.515668	2.08255	2.14443
665	2016-07-11	24.1625	70	99.4513	2.42266	0.576505	0.0230669	0.0263297	0.0190269	0.112427	0.0146132	1.40129	0.107362	0.422435	1.81636	1.94412
666	2016-07-14	24.5333	72.5	98.7262	3.07361	0.671696	0.0611149	0.0599246	0.0149962	0.135196	0.0269671	1.73807	0.238947	0.49417	1.93648	2.08277
667	2016-07-17	22.9417	72.5833	99.5983	2.38513	0.531781	0.0288181	0.0405864	0.0072341	0.0615013	0	2.07181	0.421606	0.661624	1.90928	1.96597
668	2016-07-20	22.1208	65.1667	100.081	2.2785	0.361666	0.0104705	0.0160648	0.0024174	0.0455041	0	0.587234	0.0783593	0.195453	1.83876	1.93736
669	2016-07-26	24.3375	65.9167	99.4042	2.11234	0.781355	0	0	0	0	0.00211295	2.77074	0.127977	0.0190525	1.45842	1.45216
670	2016-08-01	23.3625	77	99.5442	3.35768	0.667213	0.0156679	0.0192145	0.01451	0.103641	0	2.81679	0.496706	0.975826	2.12326	2.17657
671	2016-08-04	25.375	72.7083	99.3192	2.25435	0.941367	0.0281377	0.0130529	0.00845785	0.0362523	0	1.26645	0.209928	0.382177	1.76686	1.82293
672	2016-08-07	22.975	60.7917	99.3929	1.93774	0.469809	0.0146893	0.0121224	0.00428563	0.00991858	0	0.644723	0.0771507	0.199018	1.66749	1.71106
673	2016-08-10	26.9542	72.25	99.5379	2.55376	1.41397	0	0	0.00214221	0	0	0.0788668	0.569266	0.160225	1.77619	1.80561
674	2016-08-13	25.0625	90.375	98.6908	3.11335	1.02535	0	0	0.00227826	0.00108007	0	0.298817	0.220068	0.0597988	2.37005	2.38421
675	2016-08-16	23.75	83.5	99.2992	1.74668	0.3974	0.022327	0.0162201	0.00673933	0.0668288	0	1.77201	0.10595	0.532517	1.92168	1.98654
676	2016-08-19	24.1125	81.9583	99.07	2.40428	0.831777	0	0	0	0	0.0111158	1.84915	0.396209	0.0929899	1.92751	1.92536
677	2016-08-22	19.1417	71.375	99.8329	1.55626	0.449669	0	0	0	0	0.0258225	1.08205	0.105807	0.0141063	1.79971	1.79251
678	2016-08-25	25.3087	82.5217	99.2374	2.72401	0.615924	0	0	0	0	0.0137203	0.469918	0.858104	0.230668	2.06686	2.06774
679	2016-08-28	23.4333	90.6667	99.8904	2.80648	0.312049	0.00380493	0.0123687	0.00756585	0.0774463	0	2.11282	1.32862	0.684675	2.39484	2.44503
680	2016-08-31	22.25	79.2083	99.3083	2.91766	0.368321	0.0538771	0.0349582	0.00932572	0.102573	0.0578402	1.14298	0.278698	0.372959	2.94842	2.32349
681	2016-09-03	18.2708	76.4167	100.084	2.55855	0.394948	0.160166	0.0180432	0.00387035	0.0133041	0.0886345	0.564758	0.259029	0.253217	2.28203	2.60386
682	2016-09-06	25.5667	78.625	99.62	3.76759	0.810638	0	0	0	0	0.0327934	1.07499	0.392807	0.0971003	2.06785	2.06658
683	2016-09-15	16.8333	80.8333	100.182	2.12638	0.68397	0.056499	0.0178272	0.00362664	0.0542858	0.0594942	0.555193	0.235832	0.232705	2.38402	2.57946
684	2016-09-18	20.7958	83.5	99.2108	2.93893	0.506423	0.0924814	0.0732251	0.00744927	0.064966	0.0687883	2.10295	0.972283	0.922633	2.37504	2.46482
685	2016-09-21	20.0958	71.625	99.9392	2.82891	0.864759	0.0590384	0.0306865	0.0124361	0.0914585	0.0516219	1.33133	0.329366	0.489609	2.14565	2.28081
686	2016-10-06	20.8958	74.4583	99.855	1.10307	0.00739912	0.1283	0.0213036	0.00180598	0.0238453	0.0303777	0.285322	0.181632	0.145694	2.69644	3.26122
687	2016-10-09	9.83333	67.4583	100.477	1.38007	0.233741	0.00463338	0.0331332	0.00943381	0.0779609	0	2.47381	0.479224	0.90462	2.31094	2.37694
688	2016-10-12	17.5167	72.375	99.4125	2.05464	0.297782	0.0108985	0.0579938	0.0153914	0.0948814	0	1.42198	0.54932	0.582426	2.15967	2.2766
689	2016-10-15	14.875	77.9583	99.7004	1.89062	0.298679	0.13898	0.0650433	0.00514451	0.0439808	0.140697	1.44592	0.671889	0.672469	2.39523	2.52623
690	2016-10-18	21.4625	74.875	98.2996	2.79728	0.243769	0.0608972	0.0373947	0.0143609	0.0787691	0	1.73558	0.187719	0.539581	2.09037	2.18912
691	2016-10-24	9.14167	66.4167	100.04	1.09825	0.0185926	0.00999864	0.0229035	0.0098655	0.0522636	0.00200242	0.260733	0.106505	0.106147	2.23796	2.77129
692	2016-10-27	7.14583	91.75	99.5792	0.655289	0.0760354	0	0.0119953	0.000328616	0.00565366	0	0.425525	0.534244	0.309451	2.80769	2.83025
693	2016-10-30	10.0208	85.2917	99.6046	1.2116	0.0417827	0	0.0112849	0	0.00782414	0	0.340852	0.229139	0.190701	2.62615	2.65896
694	2016-11-02	14.8458	91.5417	99.7046	3.78638	0.160704	0.0953807	0.116845	0.0179147	0.086301	0.0942385	2.21952	3.70422	1.7779	3.12639	3.19583
695	2016-11-05	10.2208	77.5417	100.295	2.44751	0.542814	0.0926153	0.165064	0.0217041	0.152396	0.181966	1.08022	1.53139	0.665595	2.84455	3.0099
696	2016-11-08	10.2917	85.75	99.6838	1.85776	0.0933596	0.052217	0.107405	0.0241609	0.108842	0.0748319	1.57392	3.97224	1.63103	2.92187	3.00989
697	2016-11-11	7.41667	61.4583	99.8192	2.24845	0.375485	0.00557052	0.0197769	0.00698445	0.0501203	0	0.288281	0.139706	0.13308	2.72065	2.94512
698	2016-11-14	6.45	68.6667	99.1879	2.76047	0.187907	0.0352251	0.0624661	0.0175334	0.0914675	0.0042183	0.922647	2.34486	0.80399	3.04165	3.14213
699	2016-11-17	9.45833	84.375	99.3346	2.68745	0.152349	0.00965465	0.0826338	0.00407188	0.034978	0.0092067	1.44441	4.98498	1.95051	3.12367	3.15396
700	2016-11-20	0.0166667	57.4583	99.6063	0.36601	0.0715204	0.00655889	0.0163442	0.00259007	0.00878481	0	0.134631	0.036447	0.0662154	2.20827
701	2016-11-23	0.8375	88.5	99.9887	0.980076	0.304755	0.0242779	0.0512925	0.00453863	0.0378754	0.0412511	0.572943	3.56165	1.21933	3.27164	3.32466
702	2016-11-26	4.14583	78.1667	100.1	0.597723	0.0170163	0.0195344	0.0618552	0.00501096	0.0272435	0.0851649	1.05999	1.5135	0.817388	2.65693	2.69507
703	2016-11-29	10.2208	85.5	98.005	1.26179	0.0480811	0.0257475	0.0342709	0.00473788	0.0305239	0.0012643	1.10044	0.545318	0.49458	2.6367	2.70646
704	2016-12-02	3.48333	74.2917	99.4696	0.593603	0.169845	0.0284788	0.0671405	0.00772624	0.0470738	0.0443677	1.2464	0.572391	0.529169	2.44967	2.56061
705	2016-12-05	2.04583	84.4583	99.3162	0.42739	0.00563658	0.0374618	0.0932796	0.0147564	0.0559696	0.141442	2.50038	3.38825	1.79296	2.64864	2.73015
706	2016-12-08	-2.3625	74.625	99.6175	0.57771	0.132453	0.0791165	0.0762599	0.0185026	0.0839478	0.0367756	2.1559	1.38897	1.03936	2.74464	2.94114
707	2016-12-11	-2.61667	92.125	99.7596	0.332864	0.30056	0.0133012	0.0464005	0.0024919	0.0303325	0.0248631	1.52834	2.22633	1.20115	2.99499	3.08685
708	2016-12-14	-10.3417	70.875	99.525	0.307215	0.302518	0.10883	0.0540155	0.00966472	0.0418142	0.0419465	1.0291	2.9023	1.06368	2.69122
709	2016-12-17	-3.77083	91.8333	98.3462	0.311242	0.11618	0.0537496	0.0765029	0.00380177	0.0253118	0.103603	1.44345	4.00196	1.63145	3.0375	3.14259
710	2016-12-20	-6.59583	71.0833	100.183	0.953906	0.391957	0.126633	0.0834801	0.00663017	0.0442093	0.117143	1.56789	7.16275	2.32944	3.24926	3.36688
711	2016-12-23	-1.37083	88.5417	100.197	1.13194	0.482413	0.116268	0.126214	0.00996761	0.0749937	0.165942	1.35119	9.78594	3.19235	3.4024	3.49199

## Sheet: Ottawa
item	Date/Time	Temp (°C)	Rel Hum (%)	Stn Press (kPa)	NH3(g)	HNO3(g)	Na(p)	K(p)	Mg(p)	Ca(p)	Cl(p)	SO4(p)	NO3(p)	NH4(p)	pH_EAIM II	pH_EAIM IV	*All chemical compositions have the unit ug/m3
1	2007-05-30	19.3208	78.25	101.015	2.85849	0.500796	0.0401345	0.0439937	0.0341946	0.398195	0.000493828	2.94226	0.597017	1.03879	2.28848	2.50629
2	2007-06-02	20.4292	91.8333	100.159	2.05392	0.788506	0.100929	0.102016	0.0711641	0.651676	0.0201313	5.73733	1.39615	2.08888	2.39583	2.68879
3	2007-06-05	13.2333	99.9167	98.635	1.50489	0.409003	0.00394612	0.0328152	0.0125249	0.146667	0	1.95649	1.13655	0.958574	4.50156	4.61906
4	2007-06-08	20.75	85.5833	99.8037	2.49186	1.2151	0.102674	0.100576	0.0571477	0.535765	0.000443329	5.62406	0.801209	1.81656	2.24821
5	2007-06-11	21.8625	80.4167	100.862	2.05922	0.775982	0.0830916	0.0804362	0.0097263	0.0908934	0.0039168	3.38542	0.401425	1.13014	2.02842	2.11364
6	2007-06-14	20.0375	72.875	101.025	2.99291	0.477062	0.0559727	0.0534283	0.00809682	0.0848766	0	0.968329	0.34782	0.418403	2.19726	2.38538
7	2007-06-17	22.0042	68.5	100.198	2.10501	0.220771	0.0169535	0.0451993	0.0031033	0.0379039	0.000465398	2.31242	0.171939	0.729724	1.83282	1.86776
8	2007-06-20	18.9792	76.6667	100.172	2.17173	0.0891519	0.0117902	0.0251685	0.000231196	0.0294192	0	0.780059	0.0804024	0.277372	2.14906	2.20487
9	2007-06-23	14.1917	59.5417	100.365	0.838096	0.0780307	0.0266666	0.0351375	0.00202989	0.0353497	0.0126525	0.182297	0.0173627	0.0545386	1.74268
10	2007-06-26	26.45	69.625	100.84	2.42429	2.00108	0.0672251	0.0920837	0.0120737	0.161108	0.0409491	8.08133	0.377527	2.69617	1.66911	1.72826
11	2007-06-29	16.1208	71.5	100.685	0.617836	0.445459	0.00141643	0.0133913	0.000223496	0.0610734	0	0.137761	0.0199263	0.0485623	2.6142	2.87796
12	2007-07-02	16.15	76.2083	101.199	1.4305	0.336933	0.00416378	0.0309695	0.000756638	0.0257141	0	0.249778	0.0135643	0.0933878	2.1177	2.3058
13	2007-07-05	19.2	92	100.003	2.33885	0.361043	0.0304435	0.0970486	0.00381993	0.0373811	0	9.33916	2.0041	3.87081	2.5859	2.61427
14	2007-07-08	18.4542	95.125	99.7733	2.20895	0.240731	0.0193326	0.05218	0	0.0197813	0	1.08606	0.242499	0.476398	2.81978	2.87872
15	2007-07-11	21.9583	86.5833	99.345	2.0984	0.279731	0.0105071	0.0317513	0.00596932	0.0506176	0	5.54726	0.683648	1.85952	2.1523	2.17821
16	2007-07-14	16.225	89.5417	100.014	2.06784	0.434059	0.00922737	0.0250783	0.0043225	0.051835	0.00265866	0.970619	0.26593	0.441387	2.64366	2.71886
17	2007-07-17	19.8333	72.125	100.496	1.5629	0.242401	0	0.0121815	0.00239111	0.0175697	0	0.355279	0.0266288	0.142399	1.89363	1.95444
18	2007-07-20	16.2333	94.5833	99.8642	1.23341	0.172331	0	0.0177287	0.00554263	0.0757055	0	0.978907	0.152194	0.388868	2.62399	2.73798
19	2007-07-23	19.6625	75.7083	101.12	1.78256	0.184175	0.0251166	0.0369419	0.00725781	0.115526	0.0090117	0.842596	0.244486	0.340973	2.79906	2.25256
20	2007-07-26	22.9292	83.3333	100.741	1.56795	0.507833	0.0263306	0.0427698	0.0114845	0.0819878	0.0145863	11.4065	0.678954	3.7405	1.79705	1.83668
21	2007-07-29	20.8167	73.7083	100.565	1.17664	0.0776953	0	0.0255614	0.00221536	0.0112321	0.00567401	0.20858	0.0329654	0.097144	1.74633	1.86649
22	2007-08-04	20.5333	64.2083	100.586	1.09905	0.114916	0.001696	0.0204747	0.00228702	0.0249442	0.00897944	0.267517	0.0964544	0.112166	1.59715	1.74305
23	2007-08-07	21.8458	91.7917	100.067	2.03875	0.194492	0.00967737	0.0344938	0.00451348	0.0308417	0.00334124	3.14388	0.413147	1.18807	2.37888	2.40614
24	2007-08-10	20.35	72	100.241	2.1029	0.147697	0.0440396	0.0280188	0.00607987	0.0509827	0.00843031	0.582259	0.256614	0.24292	1.9991	2.20777
25	2007-08-13	21.3708	58.3333	100.246	1.09727	0.0703755	0	0.00847361	0.00367538	0.0562312	0.00941023	0.351567	0.0975235	0.127896	1.47905
26	2007-08-16	18.4417	84.2917	99.8863	3.64044	0.338252	0.0120673	0.0388716	0.0053572	0.0573067	0.00435675	0.816719	0.171386	0.312038	3.40841	2.69869
27	2007-08-19	14.6542	70.8333	101.183	0.992277	0.0753594	0.0151643	0.0174449	0.00213459	0.00570412	0.000437051	0.133962	0.0353549	0.0565543	1.94718	2.21387
28	2007-08-22	15.8333	86.8333	101.043	2.34786	0.0501557	0.0202437	0.0394321	0.00654451	0.082987	0	1.0247	0.585833	0.509328	2.63819	2.75905
29	2007-08-25	22.5	97.0833	99.5708	1.81304	0.346014	0.0142145	0.0391256	0.00265447	0.022335	0.00437506	2.24651	0.591819	0.893275	2.68754	2.72115
30	2007-08-28	20.2625	76.75	100.994	2.73392	0.421094	0.00749262	0.025879	0.0112653	0.116214	0	0.450427	0.435835	0.268941	2.22137	2.68787
31	2007-08-31	17.175	81.375	100.93	1.05848	0.0681244	0	0.014507	0.00157167	0.0315708	0	0.246148	0.155078	0.147056	2.04592	2.21547
32	2007-09-03	20.225	70.6667	100.338	1.33401	0.115717	0	0.0327291	0.00226964	0.0406537	0	1.51773	0.131724	0.495471	1.7598	1.8003
33	2007-09-06	21.2083	80.6667	100.799	2.72301	0.562047	0.0241897	0.0738014	0.0105108	0.0783057	0	9.22568	0.541358	3.03507	2.13776	2.17075
34	2007-09-09	13.9625	86.625	100.948	0.954132	0.123926	0.0374975	0.0562149	0.00171529	0.0437256	0.0220997	0.221743	0.12336	0.108632	2.30064	3.0037
35	2007-09-12	13.7625	83.2917	100.092	0.880372	0.161582	0	0.0148826	0.00208996	0.0449753	0	0.352372	0.0388217	0.15245	2.18199	2.34796
36	2007-09-21	18.7292	86.4583	100.856	2.03838	0.328976	0.0499232	0.156362	0.0117241	0.105898	0.04683	6.19551	0.678673	2.28711	2.33262	2.40086
37	2007-09-24	17.1417	71.7917	101.008	1.99551	0.199897	0.0150933	0.100897	0.0115071	0.177334	0.0355451	0.936021	0.219282	0.415556	2.15256	2.52376
38	2007-09-27	15.475	98.1667	100.276	2.2255	0.00576284	0.0512726	0.0868168	0.00932294	0.112212	0.0388357	0.932215	0.763917	0.5032	3.3739	3.58176
39	2007-09-30	11.2208	91.9167	102.05	2.06075	0.0491227	0.0302502	0.101753	0.00592774	0.0428348	0.0333966	0.691673	0.53224	0.377306	3.04102	3.18541
40	2007-10-03	19.1652	84.4783	100.44	1.72274	0.261423	0.118676	0.119802	0.0198286	0.0438956	0.0340496	5.064	0.589384	1.73888	2.15823	2.24033
41	2007-10-06	12.2958	97.9583	101.015	1.84457	0.132222	0.00966199	0.113809	0.00522508	0.0142911	0.0327951	2.12094	0.901533	1.06226	3.40797	3.4559
42	2007-10-09	9.0875	94.9583	100.151	1.14442	0	0.0221679	0.0797917	0.00608724	0.0347083	0.0388294	0.615438	0.716901	0.425053	3.09608	3.21745
43	2007-10-12	6.24783	85.3913	99.8013	0.379618	0	0.0225065	0.0291271	0.00575429	0.016751	0.0486582	0.117002	0.123085	0.0445935	2.28607	2.80615
44	2007-10-15	8.15417	88.7917	101.116	0.868743	0.0876568	0.037718	0.0567879	0.0101609	0.0851597	0.023842	0.437783	0.193822	0.172177	2.67136	3.09802
45	2007-10-18	12.4304	90.2174	100.173	5.12269	0.28626	0.0602265	0.149995	0.0159719	0.275447	0.0215934	2.8981	4.00698	1.91258	3.31651	3.41817
46	2007-10-21	15.0708	78.5833	100.322	1.26557	0.287215	0.0198939	0.107175	0.00323771	0.0263507	0.0217042	1.47286	0.236506	0.635557	2.19376	2.27026
47	2007-10-24	7.40833	93.7917	100.53	1.82031	0.238395	0.0233666	0.0735412	0.0134782	0.0894319	0.0267074	0.490677	1.14209	0.467936	3.33795	3.49265
48	2007-10-27	11.9542	98.8333	100.157	1.07006	0.106251	0.0200656	0.0835879	0.00215327	0.0317521	0.0190397	1.20949	0.784182	0.700891	3.42307	3.5077
49	2007-10-30	7.075	81.8333	101.603	1.88419	0.0887515	0.01482	0.105537	0.00893009	0.105728	0.0154246	1.16212	0.610248	0.598957	2.94125	3.07544
50	2007-11-02	2.58696	67.1304	101.822	1.94615	0.156612	0.017145	0.0365885	0.00890178	0.071263	0.0214844	0.454294	0.593345	0.319651	3.07945	3.23132
51	2007-11-05	4.44615	84.3077	100.219	2.39521	0.145934	0.128406	0.16291	0.00730457	0.052199	0.107432	1.97655	1.85342	1.26768	3.29269	3.37955
52	2007-11-08	-1.0625	70.7083	100	1.13361	0.0262288	0.00914058	0.0289884	0.00712443	0.0807619	0.0240751	0.448284	0.403959	0.253177	3.06446	3.23831
53	2007-11-11	0.120833	68.75	101.551	1.7786	0.115727	0.0436415	0.0826875	0.0046093	0.0372943	0.0413092	1.40062	2.28522	1.19885	3.23228	3.29317
54	2007-11-14	9.17083	75.7917	99.2621	1.36632	0.0529062	0.0662266	0.0512369	0.0057643	0.0448886	0.0245632	2.83499	1.45745	1.43133	2.57582	2.63543
55	2007-11-17	-0.758333	60.375	100.359	0.543407	0	0.0526077	0.0310204	0.00683722	0.0403269	0.0516034	0.287545	0.14877	0.112919	2.47477	2.93557
56	2007-11-20	3.3625	88.125	100.486	1.13529	0	0.018321	0.0476998	0.00408379	0.0364097	0.054444	1.31285	1.25354	0.911934	3.15195	3.19552
57	2007-11-23	-6.75417	68.0833	101.231	0.285962	0	0.0424358	0.0185731	0	0.0125081	0.0636157	0.260913	0.0909196	0.0685074	2.61264	2.74813
58	2007-11-26	1.18182	90.2273	100.317	1.26736	0.158294	0.0217544	0.0916142	0.00419061	0.0260256	0.094436	3.72143	4.73858	2.77027	3.37881	3.40388
59	2007-11-29	-1.79583	86.0417	99.9446	0.506197	0.0798958	0.0431409	0.045768	0.00609409	0.0318485	0.0608588	1.27175	2.98687	1.33653	3.0851	3.15442
60	2007-12-02	-12.3625	74.7917	101.546	0.385786	0.126713	0.125867	0.0366766	0.00957108	0.0170892	0.0915637	0.818727	0.894565	0.528635	3.34834
61	2007-12-05	-9.775	79.5417	99.7712	0.37791	0	0.0848081	0.0173257	0.00483368	0.00456056	0.014452	0.311068	0.272911	0.134826	3.22123	3.43487
62	2007-12-08	-3.7375	71.375	101.197	0.310003	0.132309	0.0537202	0.040419	0.00125336	0.0150294	0.0135164	2.28392	1.52065	1.23252	2.57227	2.68704
63	2007-12-11	-6.775	95.25	101.054	1.00859	0.10006	0.150492	0.232682	0.00677513	0.0570577	0.375096	3.4391	12.7665	4.43814	3.72196	3.82186
64	2007-12-14	-9.35833	78.0833	100.731	0.314656	0.0450685	0.0331632	0.0258665	0.000439083	0.00460755	0	0.723219	0.332495	0.314455	3.0239	3.10704
65	2007-12-17	-12.9167	74.9167	100.011	0.532759	0.0677104	0.107584	0.0658503	0.00345054	0.0131395	0	1.49023	3.48356	1.41242	3.50704
66	2007-12-20	-6.3125	87.8333	101.363	0.25302	0.0360404	0.0747668	0.0774716	0.000902477	0.00861903	0.024528	2.24255	4.84485	2.0778	2.73989	2.99264
67	2007-12-23	2.06667	90.5833	100.092	0.70065	0.422368	0.0565484	0.0421524	0.00136412	0.00481488	0.0061215	2.01919	2.69247	1.45007	2.97534	3.04015
68	2007-12-26	-1.43333	81.6667	101.26	0.349622	0.0335677	0.0714279	0.0545958	0.00352413	0.0464595	0.0236337	5.05412	2.13467	2.32852	2.47885	2.6566
69	2007-12-29	1.74167	75.5833	99.9429	0.233297	0.0718655	0.049211	0.0273266	0.0005796	0.00605999	0	2.33078	0.812181	1.10009	2.28043	2.36373
70	2008-01-01	-5.30417	94.0833	100.163	0.357187	0.329253	0.0658539	0.28655	0.00960352	0.0158092	0	3.19347	1.53308	1.40479	2.60291	3.24742
71	2008-01-04	-6.67917	80.5417	101.545	0.277429	0.120585	0.0864765	0.061943	0.00562976	0.0276012	0.0408265	3.29925	5.9885	2.80885	2.66255	2.91998
72	2008-01-10	-0.0958333	70.1667	100.822	0.731469	0.183094	0.119115	0.0301883	0.0112666	0.0561213	0.00664552	1.09577	0.331643	0.438381	2.69329	2.89912
73	2008-01-13	-5.9875	69.0417	101.321	0.418268	0.0443542	0.211462	0.0258122	0.0227182	0.0396682	0.0280246	0.691233	0.569496	0.30391	2.79361	3.25797
74	2008-01-16	-8.29583	74.125	101.427	1.64271	0.19206	0.18113	0.0437867	0.00520336	0.0475626	0.0367308	0.323707	0.655895	0.205812	3.79907	4.1389
75	2008-01-19	-6.45417	68.375	100.225	0.37215	0.321738	0.130744	0.041203	0.00487296	0.0243704	0.0137902	0.651141	2.21978	0.83843	2.87792	3.13791
76	2008-01-25	-9.84167	78.2917	101.027	0.536113	0.482681	0.0805455	0	0.00512771	0.0185151	0.0347312	1.17162	1.49642	0.864236	3.35639	3.45427
77	2008-01-28	-7.3125	82.125	101.07	0.374078	0.259167	0.208928	0.143688	0.00632673	0.0415362	0.391659	4.80526	12.6363	5.26991	2.82274	2.99875
78	2008-01-31	-9.2	64.0833	102.112	1.65571	0.212302	0.366182	0.03163	0.0304035	0.0764643	0.0943906	1.20096	0.922475	0.429434	3.5813	3.88026
79	2008-02-03	-2.2125	87.4583	101.16	0.647161	0.245584	0.0916538	0.0466132	0.0119058	0.0447153	0.02323	2.47321	2.06658	1.46951	3.12401	3.24895
80	2008-02-06	-3.4125	80.4167	99.9571	0.174435	0.0830744	0.0579562	0.0196623	0.00870228	0.0458853	0.0241032	2.02844	0.101314	0.578679	1.37666	2.01885
81	2008-02-09	-5.78333	96.4583	100.185	0.20487	0.46643	0.108125	0.0967036	0.0107581	0.0495298	0.161483	4.07171	13.1158	5.16337	2.21603	2.76592
82	2008-02-12	-16.8375	66.4583	101.774	0.672166	0.233339	0.448001	0.0438742	0.0242261	0.0536908	0.368018	1.21108	1.41767	0.645957	3.6406
83	2008-02-15	-6.90833	72.7083	100.523	0.17504	0.187069	0.114938	0.0332755	0.00302512	0.00228251	0.0635939	1.7204	1.48223	1.03091	2.4914	2.70966
84	2008-02-18	2.5625	83.625	98.5888	0.405793	0.123945	0.0376996	0.0262396	0.00226593	0.00692662	0.0253731	2.71003	2.02319	1.59709	2.62305	2.66557
85	2008-02-21	-14.0583	62.5417	101.615	0.478685	0.224114	0.249192	0.0329379	0.0136278	0.0695613	0.125814	0.977663	0.770113	0.456852	3.22577
86	2008-02-24	-5.80417	76.5	100.554	0.333355	0.370224	0.0591794	0.0525859	0.00461579	0.0295053	0.00810639	3.07164	3.67369	2.14686	2.72617	2.90455
87	2008-02-27	-11.5042	53.2083	99.4712	0.23366	0.423911	0.146385	0.0106468	0.0223137	0.021668	0.174127	0.352663	0.24661	0.125167	2.13467
88	2008-03-01	-6.85	88.5417	100.269	0.0481517	0.224226	0.0889472	0.05845	0.00935662	0.00820658	0.0179378	1.76463	4.00945	1.76918	2.09764	2.60057
89	2008-03-04	-1.72083	64.0417	100.53	0.256963	0.117101	0.0618006	0.0115762	0.0138364	0.0259449	0.0196038	0.981282	0.215062	0.406296	2.24407	2.4314
90	2008-03-07	-1.10417	89.2083	101.167	0.325444	0.811831	0.0625019	0.0465262	0.00497309	0.0106002	0.0860234	4.54444	7.71635	3.89237	2.50693	2.59859
91	2008-03-10	-11.3167	60.9583	101.561	0.521187	0.301429	0.103711	0.049089	0.00782419	0.0431691	0.0614476	0.76871	1.13482	0.60045	3.22785
92	2008-03-13	-10.1375	66.625	100.433	0.480456	0.242095	0.110726	0.0220541	0.011413	0.0743609	0.0024951	0.679831	1.40746	0.569177	3.16487
93	2008-03-16	-2.37917	67.7083	101.078	0.294717	0.151491	0.0337734	0.0142256	0.0065772	0.0170339	0.0235628	0.871912	0.750481	0.534411	2.52933	2.6253
94	2008-03-19	0.775	99.0833	99.5558	0.495558	0.74848	0.0288538	0.0432085	0.00240085	0.0110813	0.0887263	1.28024	2.85354	1.35841	3.71062	3.74047
95	2008-03-22	-6.79167	41.5	100.528	0.399686	0.368368	0.419529	0.0143614	0.00537554	0.0507383	0.0112104	0.500248	0.134494	0.185576	2.25842
96	2008-03-25	-4.85833	77.2917	100.786	0.947517	0.983926	0.0570149	0.0618812	0.0124251	0.183978	0.0417347	1.67022	2.66245	1.24305	3.16714	3.37353
97	2008-03-28	-1.66667	50.625	100.751	0.541517	0.270319	0.271846	0.0254686	0.036614	0.135552	0.272012	0.50206	0.398943	0.192764	2.39455
98	2008-03-31	0.1625	90	101.392	1.21105	1.1447	0.0879852	0.041053	0.00789483	0.0600332	0.0680339	1.34048	2.2498	1.1777	3.34494	3.4323
99	2008-04-03	0.554167	52.6667	101.584	1.23662	0.692393	0.0404498	0.0348653	0.0160666	0.257565	0.0291182	1.5706	1.14748	0.848754	2.71512
100	2008-04-06	3.59583	78.0417	101.554	0.974427	0.57673	0.035591	0.0619394	0.00621017	0.0850391	0.0305005	2.17325	2.68424	1.58539	2.82273	2.90456
101	2008-04-09	7.60833	70.875	100.687	1.63718	0.475234	0.147034	0.0459362	0.0218545	0.187356	0.0164799	2.31681	0.897887	0.916314	2.59869	2.79222
102	2008-04-12	2.0875	94.2917	99.2933	0.565885	0.222207	0.0352059	0.0132253	0.00158877	0.0180985	0.0159352	0.41143	0.258319	0.224342	3.10862	3.21579
103	2008-04-15	5.64583	48.25	101.148	0.916709	0.381985	0.0561356	0.0445149	0.0107213	0.227271	0.0364764	0.716249	0.34049	0.350931	2.24712
104	2008-04-18	15.1125	51.7083	100.616	2.22036	0.789782	0.103216	0.114897	0.0231602	0.293982	0.0447311	7.07899	1.00323	2.80438	2.06926
105	2008-04-21	16.4208	56.6667	101.412	3.07738	0.514303	0.135358	0.0490981	0.0231167	0.163078	0.0425683	3.70156	0.998142	1.50915	2.2073
106	2008-04-24	13.9375	43.25	101.367	1.66249	0.361544	0.0407355	0.0265267	0.0106433	0.168662	0.0168665	0.774871	0.246017	0.345287	1.92363
107	2008-04-27	13.7542	62.5	100.819	2.78045	0.378631	0.0872064	0.118373	0.0112165	0.0798892	0.0614485	2.44232	1.2661	1.27339	2.44149	2.54185
108	2008-04-30	4.19583	63.8333	100.594	0.437183	0.335829	0.0238555	0.0182037	0.00505587	0.0404641	0.00518746	1.81798	0.31684	0.702218	2.07626	2.17131
109	2008-05-06	11.9417	48.7083	100.399	2.34322	0.328769	0.036407	0.0603273	0.00417042	0.0285343	0.0343704	3.10208	2.27987	1.83227	2.37264
110	2008-05-09	10.3833	53.375	100.103	0.925568	0.19286	0.0109452	0.00954623	0.00242266	0.0255888	0.0121123	0.469444	0.0789094	0.217801	1.95768
111	2008-05-12	13.9458	49.4583	100.098	2.90982	0.379136	0.0400743	0.0144541	0.00854543	0.13462	0.00217657	0.439846	0.280382	0.223051	2.24032
112	2008-05-15	14.575	55.6667	100.397	1.54161	0.161409	0.00792181	0.00897027	0.00345818	0.0401377	0	1.12084	0.364108	0.443061	1.96653
113	2008-05-18	10.7917	70.3333	98.3067	1.33603	0.323119	0.0151595	0.0193735	0.00322996	0.0363579	0.00221739	0.639325	0.163382	0.265481	2.31672	2.41477
114	2008-05-21	7.87917	81.4583	98.51	1.00815	0.376256	0.0199671	0.00855871	0.00327689	0.0643589	0.0133041	0.436117	0.156864	0.189601	2.60133	2.7711
115	2008-05-27	10.8125	60.2083	100.391	0.938251	0.174825	0.0185345	0.014923	0.00352028	0.0595322	0.0154851	0.365851	0.100736	0.13244	1.99579	2.30142
116	2008-05-30	14.475	59.5417	100.678	2.18038	0.362156	0.0209641	0.0151789	0.00700446	0.0747805	0.0140672	0.6571	0.270976	0.290604	2.18152
117	2008-06-02	15.9125	79.75	99.9463	1.76505	0.244448	0.0193887	0.01162	0.00334511	0.033968	0.00688346	0.717757	0.186591	0.289868	2.29917	2.37822
118	2008-06-05	17.5833	78.625	100.586	1.88831	0.540955	0.0146396	0.0117009	0.00377701	0.134161	0	0.945159	0.271537	0.372268	2.22391	2.405
119	2008-06-08	25.475	70.2083	99.7875	2.32005	0.412376	0.118562	0.0274923	0.00867239	0.0493203	0.0995422	2.53295	0.396438	0.770557	1.72253	1.79342
120	2008-06-11	19.2875	65.25	100.555	1.47293	0.130434	0.0125114	0.00807489	0.00241873	0.0337932	0.00696076	0.866833	0.107473	0.250052	1.77697	1.83075
121	2008-06-14	21.8333	81.5417	100.185	3.13162	0.746352	0.0257885	0.046832	0.00422976	0.0348102	0.00492989	3.71515	0.503149	1.26043	2.25077	2.27702
122	2008-06-17	14.8917	87.0417	99.4813	1.53042	0.293203	0.0181453	0.0202854	0.00476768	0.055917	0.00574422	0.447678	0.170536	0.178614	2.48336	2.68738
123	2008-06-20	16.4917	79.1667	100.274	2.35546	0.573621	0.0188581	0.0221491	0.00206977	0.0600664	0.0203559	0.543419	0.237509	0.242816	2.41381	2.57181
124	2008-06-23	16.1625	90.9583	100.275	2.3543	0.688665	0.0583208	0.037322	0.00210188	0.0538066	0.0214454	2.45523	1.29623	1.23967	2.76629	2.81603
125	2008-06-26	20.6375	80.75	99.8462	2.2074	1.36866	0.0303531	0.0857115	0.00753052	0.0807477	0.0408479	6.5412	0.70724	2.3552	2.12446	2.16373
126	2008-06-29	21.3583	86.5833	99.4142	2.30996	0.879745	0.010573	0.0566888	0.00534595	0.0427921	0.0201803	3.57352	0.88688	1.38031	2.28749	2.31748
127	2008-07-02	20.9875	68.0417	100.031	2.02657	0.54353	0.0405621	0.157671	0.0170602	0.0860493	0.0282382	2.65414	0.306075	0.854027	1.86259	1.96565
128	2008-07-05	20.2083	65.3333	100.602	1.68091	0.312609	0.0257207	0.0248568	0.00289067	0.0727036	0.0196686	0.459154	0.157076	0.187736	1.81479	2.11008
129	2008-07-08	24.15	76.375	99.8713	1.91652	0.909973	0.03292	0.110084	0.0148705	0.105286	0.0174915	9.68398	0.456033	3.14735	1.73274	1.7842
130	2008-07-11	18.125	73	100.835	2.00559	0.281875	0.0256333	0.0234955	0.00325663	0.0789407	0.0207784	0.375329	0.185022	0.178368	2.11696	2.5377
131	2008-07-14	19.675	71.9167	99.7179	1.63247	0.116194	0.0333343	0.026654	0.00342333	0.0878221	0	0.418012	0.110502	0.427314	1.97834	2.50343
132	2008-07-17	22.8083	68.5417	100.813	2.29119	0.346209	0.0016235	0.0192754	0.00418855	0.062229	0	1.52566	0.222435	0.322913	1.81005	1.85753
133	2008-07-20	20.5083	83.6667	100.207	1.91208	0.10599	0.0155867	0.057147	0.00120322	0.023682	0	1.41333	0.192575	0.45484	2.14364	2.19067
134	2008-07-23	19.3333	89.2917	100.36	1.19754	0.338048	0.0234968	0.0279327	0.00295369	0.0286979	0	3.25691	0.291379	1.08431	2.12321	2.16003
135	2008-07-26	20.6583	83	99.9046	1.54099	0.0495971	0.00607194	0.0168152	0.00192645	0.0503251	0	0.222196	0.0965329	0.0912654	2.04202	2.49371
136	2008-07-29	19.5125	79.5	100.186	1.58192	0.376657	0	0.032174	0.00545959	0.0527796	0	5.69439	0.482955	1.79359	1.94199	1.96949
137	2008-08-01	20.9875	80.125	99.4521	1.73397	0.114198	0.00169123	0.0165473	0.0015158	0.0409876	0	0.662558	0.12745	0.211436	2.00603	2.07566
138	2008-08-04	21.025	79.1667	100.316	1.42601	0.139786	0	0.0130031	0	0.026932	0	0.156453	0.100657	0.0732632	1.91281	2.14569
139	2008-08-07	18.2875	88.2083	99.6579	2.63425	0.165132	0	0.00455609	0	0	0.0290007	0.20116	0.158843	0.0703832	2.5608	2.58139
140	2008-08-10	17.6042	83.25	100.096	2.68276	0.0819106	0	0.00969682	0	0	0.0229197	1.11922	0.112454	0.431095	2.4528	2.4559
141	2008-08-13	16.1958	80.25	99.8812	3.38875	0.0914981	0	0.00340399	0.00228656	0.0701208	0.0412098	0.378628	0.197582	0.147954	2.58129	2.77474
142	2008-08-16	18.7	76.7083	100.258	2.25772	0.0668028	0	0.0218514	0.000705581	0.0289643	0.040671	0.285104	0.182802	0.1187	2.1891	2.32371
143	2008-08-19	14.775	67.2083	100.818	1.51691	0.0912128	0	0	0.000772033	0.00818734	0.0433541	0.171443	0.162814	0.0582173	2.07556	2.11875
144	2008-08-22	20.6667	75.5	101.478	3.03593	0.407331	0	0.0153852	0.0069942	0.0676463	0.0278831	2.04786	0.408295	0.792284	2.20519	2.24307
145	2008-08-25	16.3708	63.0417	100.46	0.899668	1.19263	0	0	0.000233975	0.0124347	0.0357595	0.289407	0.175843	0.100621	1.71794	1.74971
146	2008-08-28	19.6333	73.4583	100.71	3.5146	1.05678	0.0337178	0.00970574	0.0139353	0.152284	0.0254721	0.949783	0.614043	0.394783	2.32971	2.55296
147	2008-08-31	19.25	66.625	101.14	2.31775	0.164063	0	0.00528184	0.0012831	0.0187603	0.0269827	0.919058	0.0475769	0.304452	2.00787	2.02561
148	2008-09-03	22.2417	71.75	100.255	3.09061	0.798822	0	0.0171626	0.00707536	0.0987413	0.0267287	1.63597	0.360432	0.71951	2.08506	2.15082
149	2008-09-06	16.9875	93.1667	100.18	2.20241	0.198793	0	0	0	0	0.0271321	1.14075	0.0919016	0.427569	2.74496	2.74545
150	2008-09-09	14.3917	84.2083	100.409	1.38217	0.137207	0	0	0	0	0.0276339	0.505388	0.0628502	0.187743	2.35886	2.35851
151	2008-09-12	16.0375	92.9167	100.37	3.25511	0.324638	0	0.0284629	0.000194953	0.0207651	0.0630429	3.27314	1.82594	1.68239	3.00425	3.0117
152	2008-09-15	11.14	84.6667	100.387	0.950308	0.189601	0	0	0	0	0.0332549	0.231463	0.168581	0.0969322	3.11978	2.42091
153	2008-09-18	9.03333	71.375	101.768	0.931336	0.157806	0	0	0	0.00227202	0.0282219	0.251709	0.181728	0.115033	2.27074	2.27395
154	2008-09-21	11.0625	67.6667	101.653	0.607199	0.155885	0	0	0	0	0.0357197	0.165647	0.0117959	0.0483633	1.87409	1.85754
155	2008-09-24	16.0667	76.0833	101.897	2.7294	0.39653	0.0554943	0.0757976	0.00813213	0.117672	0.0854058	1.91596	0.690226	0.763477	2.43801	2.54693
156	2008-09-30	13.1708	90.5833	99.9262	2.12594	0.370942	0	0.0140977	0.0011436	0.0332956	0.0035561	1.90727	0.71195	0.875107	2.85882	2.88131
157	2008-10-03	7.33333	71.5	99.8696	0.823169	0.0651618	0	0.00857767	0	0.0299006	0.0092579	0.554233	0.0351229	0.218496	2.2866	2.34328
158	2008-10-09	15.5375	68.625	99.7662	1.18407	0.215126	0	0.0165325	0.00370008	0.085081	0.00323974	1.6672	0.585144	0.701402	1.97922	2.04968
159	2008-10-12	12.4958	75.0833	102.124	2.47597	0.0732629	0	0.0447241	0.00263888	0.0443015	0.00151592	0.955525	0.425315	0.448455	2.58372	2.64943
160	2008-10-15	9.95833	73.25	100.856	1.97834	0.24544	0.00954673	0	0.00728212	0.0829389	0	0.530841	0.292891	0.234886	2.62327	2.79856
161	2008-10-18	3.62917	72.8333	101.655	3.1692	0.0880268	0.00620991	0.00531285	0.0018842	0.0341023	0	0.479277	0.256397	0.207982	3.22763	3.28945
162	2008-10-21	6.23333	90.7917	100.349	0.723617	0.111153	0.00243977	0	0	0.00431221	0	0.557232	1.38597	0.641284	2.91998	2.929
163	2008-10-24	4.82917	73.25	101.735	3.17206	0.103888	0.0463349	0.0206193	0.00761883	0.0846086	0	0.906242	1.9011	0.809899	3.26238	3.34366
164	2008-10-27	6.65	80.25	100.145	1.65783	0.251913	0.0462454	0.0614792	0	0.0187219	0.0163099	1.09957	0.518334	0.491156	2.86444	2.92848
165	2008-11-02	0.00833333	57.75	102.31	1.3781	0.135045	0.0979406	0.0373718	0.00379043	0.0147327	0.0252569	0.402865	0.362211	0.178115	2.91659
166	2008-11-05	11.15	84.2917	101.05	2.37229	0.166896	0.0589029	0.100793	0.0105016	0.0925034	0.0197139	9.85386	3.95195	4.45973	2.78405	2.83182
167	2008-11-08	8.5	90.875	99.2279	1.72236	0.0515501	0.00818333	0.0232474	0	0.0062	0	3.39036	1.836	1.74391	3.0532	3.06524
168	2008-11-11	1.37917	77.75	101.247	0.730901	0.0358525	0.00797175	0.00860827	0	0.00820713	0	0.0876243	0.206087	0.0397413	2.84854	2.97011
169	2008-11-14	10.025	88.875	99.8704	2.93968	0.0265562	0.0318742	0.0489057	0.00192952	0.0419465	0.021462	2.42891	3.15226	1.75768	3.18747	3.21732
170	2008-11-17	-1.3875	79.8333	100.323	0.36354	0.238978	0.0233667	0.00548843	0	0.00321428	0.0057671	0.180155	0.0193313	0.0798923	2.69767
171	2008-11-20	-4.29583	67.9583	100.253	0.598507	0.127489	0.0313546	0.013094	0	0.0175098	0.0142071	0.244886	0.265072	0.0937191	2.93694	3.06932
172	2008-11-23	-7.09167	78.7917	101.586	0.788196	0.565743	0.0511704	0.0256435	0.000615925	0.0252481	0.0463989	0.354012	0.456963	0.258689	3.41715	3.50808
173	2008-11-26	0.270833	97.375	99.4237	1.06255	0.10759	0.0246133	0	0.00069384	0.0187094	0	0.848684	0.816307	0.588428	3.80704	3.84904
174	2008-11-29	-1.48333	80.1667	100.069	0.829114	0.107992	0.034464	0	0.000440761	0.0160213	0	1.00826	0.396885	0.480952	3.04433	3.0896
175	2008-12-02	0.279167	77.9583	99.975	0.661155	0.144304	0.0413523	0	0.00128414	0.0359117	0.0398344	0.782184	0.443862	0.418803	2.82929	2.89863
176	2008-12-05	-6.26667	79.6667	100.985	0.974388	0.146745	0.0391012	0	0.0020768	0.0343241	0	0.526301	0.505052	0.309863	3.4708	3.5565
177	2008-12-08	-17.7208	69.2083	101.8	0.893476	0.178209	0.158858	0	0.00884255	0.0350448	0.0408165	0.409559	0.500645	0.186038	4.0296
178	2008-12-11	-14.05	82.5833	101.005	0.53716	0.138222	0.0443735	0	0.00662476	0.0274608	0	0.483952	0.864545	0.455659	3.84381
179	2008-12-14	-6.40417	92.875	101.138	0.661058	0.255261	0.0798447	0.0586931	0.00382041	0.0209706	0.107665	1.52949	5.64875	2.00865	3.51424	3.58982
180	2008-12-17	-6.79167	86.1667	100.934	0.554477	0.248534	0.0502875	0	0.00188026	0.0150314	0.0179465	0.660384	1.63413	0.773851	3.45603	3.51728
181	2008-12-20	-16.1083	73.3333	101.436	0.209941	0	0.145325	0	0.00949141	0.0128188	0.00886569	0.309668	0.452205	0.147024	3.16753
182	2008-12-23	-15.3	81.7083	101.981	0.563606	0.124236	0.161192	0.0492284	0.0142652	0.0223156	0.0754822	1.14261	2.92603	1.18604	3.86269
183	2008-12-26	-11.7583	83.125	102.138	0.392969	0.211767	0.0846592	0.060202	0.00619863	0.0197099	0.0326124	1.5637	1.87566	1.09252	3.42613
184	2008-12-29	-0.245833	77.625	99.9646	0.738248	0.133373	0.0372097	0	0.00215939	0.0227636	0.025146	1.62701	1.15368	0.9819	2.94029	2.9786
185	2009-01-01	-17.1958	70.5417	101.425	0.433855	0.0879235	0.301402	0.0248209	0.0161821	0.0291013	0.342165	0.692581	0.670708	0.441218	3.70618
186	2009-01-04	-11.9667	70.2917	100.944	0.493073	0.218473	0.22474	0	0.0211383	0.0374741	0.197588	0.446455	0.606371	0.320892	3.40904
187	2009-01-07	-8.15	90.25	98.4517	0.253452	0.36021	0.0614823	0.027223	0.00101677	0.0152772	0.00878792	0.866291	0.998867	0.630803	3.13258	3.30911
188	2009-01-10	-16.8292	76.4167	101.468	0.595438	0.439252	0.0513243	0.0299762	0	0.00277663	0.00480198	0.896253	1.02188	0.643992	3.89276
189	2009-01-13	-5.65	85.4167	99.9313	0.189641	0.857153	0.0257722	0.0361785	0	0.00208232	0.0116546	3.22463	3.24268	2.03821	1.85689	1.92601
190	2009-01-16	-24.6042	75.1667	101.853	0.33373	0.506674	0.175111	0.0794074	0.0113017	0.0558366	0.0706258	2.50286	1.30359	1.11498	2.66874
191	2009-01-19	-10.0375	88.2083	99.5554	0.342192	0.344634	0.12052	0.0653543	0.00428615	0.0113257	0	2.17983	3.45373	1.63162	2.87254
192	2009-01-22	-3.45	85.4583	99.8108	0.17466	0.364922	0.0277958	0.0363088	0.000362393	0.00523066	0	2.95366	4.41539	2.24839	2.17774	2.29093
193	2009-01-25	-17.825	70.7083	101.182	0.381328	0.422455	0.178475	0.0588324	0.0160753	0.038534	0.00152215	1.1549	0.916456	0.551826	3.27117
194	2009-01-28	-11.0958	88.7083	100.265	0.115644	0.593967	0.0816279	0.0694081	0.000687378	0.0104481	0.0495517	1.63002	3.25065	1.44858	1.66223
195	2009-01-31	-16.1833	72.875	100.22	0.559663	0.28453	0.0990783	0.0233415	0	0	0.0220646	0.651536	0.594531	0.372865	3.73465
196	2009-02-03	-11.7667	70.9167	100.75	0.430395	0.304049	0.135874	0.0263999	1.9855e-05	0.0104091	0.0817803	0.832011	0.522063	0.416114	3.21426
197	2009-02-06	-10.5417	75.9167	101.502	0.794789	0.241955	0.0873925	0.0879859	0.00877291	0.0529874	0.230941	1.87604	6.28109	2.44435	3.63477
198	2009-02-09	-7.65417	68.5	101.891	0.850329	0.243543	0.314687	0.02941	0.0132464	0.0291239	0.197853	0.869968	0.791013	0.433639	3.26778	3.54444
199	2009-02-12	1.91667	89.0417	98.2358	0.394977	0.274662	0.0158529	0.0197326	0.00268528	0.000720232	0.0391052	0.580334	0.810551	0.519237	2.83953	2.85817
200	2009-02-15	-7.86667	69.5417	100.946	0.456304	0.127322	0.0686255	0.0305901	0.00617747	0.0302721	0.10914	0.152325	0.248955	0.102321	3.13395	3.40994
201	2009-02-18	-4.00417	84.4167	99.6725	0.775729	0.641044	0.161813	0.082097	0.0103245	0.0894195	0.21047	1.34979	5.16247	1.91388	3.2491	3.39072
202	2009-02-21	-6.8375	71.25	100.817	0.558153	0.281151	0.0540728	0.0186312	0.00301901	0.00769503	0.0887703	0.637242	0.421723	0.413007	3.14508	3.18956
203	2009-02-24	-10.8208	68.7917	101.786	0.494885	0.275892	0.239092	0.0151997	0.00799816	0.0420339	0.278699	0.714251	0.313198	0.329814	3.21376
204	2009-02-27	-0.8375	90.875	99.8479	0.584129	0.534298	0.119405	0.0933852	0.00942463	0.0117315	0.154081	2.37952	6.89574	2.76092	2.99734	3.10254
205	2009-03-02	-12.5792	54.9167	101.57	0.277389	0.428721	0.148	0.0101761	0.0134156	0.0320794	0.142797	0.550789	0.208887	0.136652	1.99138
206	2009-03-05	-6.98333	73.3333	101.55	0.954362	0.515014	0.0911915	0.0730919	0.0102803	0.0558202	0.0901244	0.906133	3.36602	1.24355	3.43717	3.5499
207	2009-03-08	1.425	65.25	100.498	0.858461	0.489506	0.0388347	0.043352	0.0095447	0.0341887	0.0249566	2.64487	1.88531	1.5247	2.68239	2.75053
208	2009-03-14	-1.175	66.875	101.189	0.801271	0.453233	0.0807847	0.0431167	0.00758927	0.0365415	0	1.71121	3.69678	1.5247	2.80548	2.92623
209	2009-03-17	2.11667	53.75	101.178	1.42409	0.817944	0.116875	0.0716044	0.019981	0.193928	0.0738765	1.78477	4.26079	1.64295	2.74703
210	2009-03-20	-3.48333	44.7917	102.084	0.70467	0.187542	0.1529	0.0322107	0.0150986	0.091298	0.0700724	0.703714	0.272276	0.264732	2.49481
211	2009-03-23	-6.19167	42.6667	102.338	0.502482	0.0932045	0.0648159	0.0334404	0.0101912	0.131722	0.0224843	0.374838	1.61731	0.513898	2.79271
212	2009-03-26	3.46957	80.6522	100.361	0.542189	0.254361	0.0919117	0.0363233	0.0113761	0.0844456	0.0153755	0.710264	0.250691	0.245043	2.49005	2.82381
213	2009-03-29	5.275	86.7917	98.9233	0.924938	0.751965	0.020034	0.0440761	0.00282761	0.0338708	0	1.58333	1.15046	0.902781	2.80917	2.86813
214	2009-04-01	4.46667	85.625	100.407	1.37038	0.361384	0.0776365	0.0591523	0.0032734	0.0482851	0	1.65133	1.77299	1.02487	3.04086	3.12541
215	2009-04-04	3.57083	99.3333	98.1112	0.498439	0.308762	0.0159154	0.00421022	0	0	0	0.161738	0.165826	0.0981159	3.74318	3.79089
216	2009-04-07	-0.879167	96	98.0704	0.586823	0.166312	0.0599532	0.00710765	0.000334328	0	0.018567	0.268787	0.0842804	0.0802628	3.39162	3.55303
217	2009-04-10	2.2875	61.8333	100.792	0.341499	0.18914	0.0498806	0.0273253	0.00212356	0.0142258	0	0.504165	0.0671067	0.159966	2.03298	2.22547
218	2009-04-13	3.00833	39.5	101.137	0.357826	0.12138	0.0295868	0.0249829	0.00559872	0.0645383	0	1.58079	0.0195722	0.336858	1.34042
219	2009-04-16	8.62917	34.5417	101.786	0.795062	1.32378	0.0442062	0.0328242	0.00671438	0.131629	0	1.33524	0.0694367	0.483534	1.78204
220	2009-04-19	7.01667	29.9583	101.199	0.831249	0.114788	0.0142642	0.0323032	0.00542307	0.0249295	0.00645721	1.13972	0.262999	0.468344	1.89024
221	2009-04-22	8.19167	79.0833	99.2971	0.729048	0.167367	0	0.0139586	0.00416696	0.0204454	0	1.28538	1.38621	0.849605	2.49271	2.52229
222	2009-04-25	19.4667	61	100.42	3.02576	0.610942	0.0328317	0.0474124	0.014266	0.0850919	0	2.37338	0.23166	0.790857	2.04463	2.11598
223	2009-04-28	13.0708	68.9583	101.307	1.73307	0.261617	0.0359318	0.0224297	0.00667109	0.0387773	0	1.20333	0.239412	0.41978	2.25657	2.33477
224	2009-06-17	20.2375	66.0417	100.877	2.40834	0.844635	0.0219177	0.029678	0.00968816	0.0869746	0.0166327	2.64486	0.53074	0.981027	1.98283	2.03882
225	2009-06-20	18.1625	81.5	99.5233	2.26882	0.43079	0.0227239	0.010285	0.000745794	0.000320713	0.0128	1.11736	0.752151	0.643551	2.38694	2.40728
226	2009-06-23	22.45	57.4583	100.17	2.21173	0.234307	0.0496854	0.0198002	0.00590264	0.0414996	0.0154838	0.737186	0.250845	0.367195	1.73973
227	2009-06-26	21.8375	68.75	99.3746	0.574645	0.244152	0.00915457	0.0120189	0.00607605	0.055672	0.012566	0.606766	0.203237	0.24319	1.32225	1.47014
228	2009-06-29	19.7875	81.5	98.7179	1.84308	0.495404	0.0203001	0.0210793	0.0047273	0.0411527	0.0192151	1.20425	0.347187	0.502537	2.1557	2.2169
229	2009-07-02	18.8417	89.3333	99.7967	2.04535	0.702722	0.0150431	0.409487	0.0113532	0.0500052	0.0148087	3.0049	0.672956	0.992841	2.41025	2.53849
230	2009-07-06	17.4333	70.4167	99.7142	1.67443	0.183006	0.0180341	0.0130436	0.00470589	0.0440584	0.0117828	0.487055	0.24434	0.204268	2.03084	2.18073
231	2009-07-09	18.5708	75.5833	101.223	1.97015	0.271159	0.0300411	0.0196492	0.00943086	0.10926	0.0167566	0.628038	0.331786	0.263528	2.12855	2.44152
232	2009-07-12	16.6917	69.2917	100.149	0.941302	0.264591	0.00997879	0.0119967	0.00308334	0.0361787	0.0163693	0.331558	0.0348879	0.118692	1.7915	1.96774
233	2009-07-15	17.4458	69.4583	100.653	1.33648	0.201927	0.00880529	0.00936974	0.00354451	0.0457725	0	0.335715	0.053031	0.128904	1.90962	2.10919
234	2009-07-18	17.8875	86.1667	99.6713	1.31083	0.278401	0.0143197	0.00978406	0.00426139	0.0369334	0	0.997315	0.305544	0.429587	2.22343	2.2867
235	2009-07-21	20.2708	75.4167	101.198	2.02764	0.486846	0.0202848	0.107806	0.0162916	0.083954	0.000795898	0.763978	0.324783	0.330176	2.0529	2.34678
236	2009-07-24	18.7833	95.4167	100.04	1.61891	0.488882	0.00730262	0.0130959	0.0106168	0.0753867	0	1.24477	0.424348	0.584677	2.70086	2.78867
237	2009-07-27	20.3292	82.5	99.8937	1.52958	0.680584	0.00646965	0.0254288	0.0023845	0.0223437	0	1.57326	0.145837	0.572236	2.04734	2.07672
238	2009-07-30	20.275	74.4583	99.9046	1.48758	0.804707	0.00145381	0.0162219	0.00290153	0.0256306	0	0.566009	0.0680748	0.238458	1.89826	1.95714
239	2009-08-02	19.8917	82.3333	99.8825	1.94405	0.370443	0.019557	0.0465141	0.00587721	0.0458763	0	4.09126	0.366149	1.43253	2.14703	2.18048
240	2009-08-05	19.0042	70.0833	100.121	1.39078	0.256524	0.009572	0.0105156	0.00549917	0.0398591	0	0.494761	0.0498774	0.178373	1.8518	1.96898
241	2009-08-08	16.4375	70.5	101.164	5.35464	0.353078	0.021574	0.00414517	0.00499196	0.0454888	0.0299785	0.284348	0.0728481	0.0982637	2.61558	2.88279
242	2009-08-11	21.5333	81.875	100.065	4.29924	0.296471	0.030675	1.23e-07	0.00663341	0.0825638	0.0314331	0.448405	0.227148	0.164729	2.43472	2.73376
243	2009-08-14	23.6042	71.9167	100.983	3.98156	0.502854	0.0106891	0.0119899	0.0126146	0.154963	0.0243672	0.668796	0.06316	0.286824	2.11128	2.48041
244	2009-08-17	24.8292	77.8333	100.692	3.70601	0.625681	0.0164581	0.0739986	0.007077	0.0821501	0.0283593	13.3195	0.45244	4.09223	1.99966	2.01952
245	2009-08-20	18.375	90.3333	100.118	4.14592	0.299773	0.0179612	0.016169	0.00358237	0.0421572	0.0389896	1.0806	0.676942	0.633185	3.54729	2.94185
246	2009-08-23	21	78.625	100.243	1.89194	0.121441	0.0136646	0.00124993	0.00108148	0.0174374	0.0286812	0.832034	0.0542948	0.309476	2.02204	2.05183
247	2009-08-26	19.0375	60.7917	100.42	0.432641	0.130685	0.017477	0.00776227	0.00431123	0.0496498	0.036138	2.07724	0.1213	0.715118	1.20884	1.26489
248	2009-08-29	13.6417	89.3333	99.8654	1.38582	0.433602	0.00962605	0.00202407	0	0.0113569	0.0320687	0.698033	0.383722	0.394599	2.63958	2.65724
249	2009-09-01	14.9833	72.4167	101.404	1.65842	0.257963	0	0	0.0023742	0.0448883	0	0.483382	0.181504	0.234733	2.20231	2.29143
250	2009-09-04	18.7167	74.75	100.825	1.84529	0.380303	0	0.00446169	0.00832169	0.164615	0	1.29011	0.315917	0.559649	2.08806	2.23923
251	2009-09-07	16.1667	74.125	101.215	2.05262	0.299894	0	0.0404604	0.00548465	0.0743229	0	0.607496	0.430585	0.292686	2.2719	2.44551
252	2009-09-10	15.7958	69.75	101.898	2.72405	0.246665	0	0.00960743	0.00926119	0.112465	0	0.530595	0.347804	0.250312	2.34317	2.62834
253	2009-09-13	17.5083	68.6667	100.352	1.52089	0.518348	0	0	0.00194867	0.0471283	0	0.447001	0.232851	0.18382	1.96448	2.06568
254	2009-09-16	12.1167	70.7083	101.666	1.45109	0.580404	0	0.00232406	0.0015894	0.0295971	0	0.405566	0.167405	0.183834	2.30517	2.37925
255	2009-09-19	9.79167	69.75	101.497	0.357605	0.0723583	0.0941399	0	0.00739508	0.0246351	0.101283	0.216247	0.20118	0.0581525	1.7286	2.41508
256	2009-09-22	19.7667	86.6667	100.915	2.89155	0.334081	0	0.0199147	0.0110926	0.0984595	0	5.18874	1.01638	2.00441	2.46416	2.49768
257	2009-09-25	9.81667	69.375	101.744	1.48245	0.147393	0.014699	0	0.00330621	0.0143586	0	0.137407	0.245398	0.0461053	2.40962	2.6543
258	2009-09-28	14.4417	92.5833	98.395	2.0408	0.234551	0.0103447	0	0.00553149	0.0342635	0	2.26209	1.1368	1.1657	2.87485	2.90019
259	2009-10-01	5.2375	86	100.405	0.771058	0.185034	0.0233604	0	0.00296233	0.010529	0.00725857	0.153311	0.205236	0.0556827	2.78054	2.90133
260	2009-10-04	11.5875	92.5833	100.112	1.50456	0.168404	0.00674935	0	0.00353018	0.0239928	0	1.33147	0.988078	0.794634	2.92406	2.94942
261	2009-10-07	11.3333	85.7083	98.6392	0.564183	0.209408	0.00605708	0	0.00268665	0.0117978	0	0.28802	0.109355	0.144674	2.20969	2.2803
262	2009-10-13	4.32083	88.5	100.995	1.84351	0.436924	0.0100249	0.0117213	0.00831181	0.0308263	0.0538507	0.60399	0.361108	0.300744	3.27608	3.31891
263	2009-10-16	1.54167	61.9167	100.963	1.0315	0.246226	0.0164992	0.0141675	0.00676785	0.0529362	0.0542571	0.363391	0.442165	0.234737	2.79061	2.93096
264	2009-10-19	4.56667	73.25	100.883	2.22486	0.102641	0.0215594	0.0429001	0.0192026	0.139253	0.0509097	1.11268	1.43091	0.792024	3.08971	3.20408
265	2009-10-22	3.0125	92.6667	100.495	0.590632	0.248809	0.0224107	0.0058299	0.00340897	0.0181815	0.0577024	0.957007	0.63574	0.577644	3.00609	3.0377
266	2009-10-25	7.84583	62.7083	100.526	0.558089	0.125842	0.00420409	0	0.00133962	0.0110091	0.0472629	0.186533	0.0435999	0.0733801	1.96749	2.04967
267	2009-10-28	6.73913	87.1304	100.74	1.34422	0.363092	0.0518565	0.0385387	0.00830997	0.0609204	0.0618713	1.14762	1.58096	0.879792	2.98545	3.05838
268	2009-10-31	11.6333	78.75	99.1933	0.71418	0.141419	0.0270115	0	0.00694477	0.0455777	0.0466963	1.36837	0.289293	0.556609	2.12802	2.1959
269	2009-11-03	5.84583	75.7917	100.56	1.20842	0.0728078	0.0188855	0.0135853	0.00751399	0.0552085	0.049842	0.498396	0.966276	0.474968	2.8269	2.90756
270	2009-11-06	-0.245833	82.1667	101.439	0.552559	0.197257	0.0150654	0.0196708	5.5431e-05	7.4556e-05	0	0.282141	0.401748	0.156452	2.87081	2.92032
271	2009-11-09	10.6167	74.2083	101.07	2.40348	0.282318	0.0326076	0.0609872	0.0146023	0.169415	0.0490295	2.90257	1.10249	1.36377	2.69013	2.77906
272	2009-11-12	1.0625	79.375	101.788	1.85552	0.119821	0.017056	0.0500394	0.0110657	0.14487	0.0578955	0.391764	1.27396	0.459753	3.3654	3.54052
273	2009-11-15	8.64167	93.8333	100.257	1.75023	0.393246	0.0282021	0.0387441	0.0042525	0.0305231	0.0896933	1.41692	2.46232	1.35959	3.26804	3.29548
274	2009-11-18	0.6375	82.3333	102.006	1.88591	0.147291	0.0438573	0.0922095	0.00945508	0.130533	0.0741579	1.00224	1.9352	0.970827	3.43541	3.5459
275	2009-11-21	7.63333	80.9583	100.869	0.521023	0.181944	0.00833042	0.0360988	0.00433925	0.0223741	0	2.63748	0.429244	1.08269	2.26576	2.31397
276	2009-11-24	2.725	96.9583	101.434	1.07874	0.319747	0.234521	0.132082	0.00674046	0.0553498	0.303035	2.98365	3.37905	2.12565	3.59545
277	2009-11-27	4.4125	93.7083	99.1412	0.832756	0.249119	0.00893954	0.0148712	0	0.00414869	0.0277472	1.07989	0.778916	0.704191	3.14854
278	2009-11-30	-0.025	86.6667	99.5646	0.56057	0.160745	0	0	0	0.0106621	0	0.366227	0.226119	0.168992	2.93705	2.96127
279	2009-12-03	4.79583	94.75	98.7942	0.559455	0.0998901	0.0157953	0.00979816	0	0	0.0240674	0.514596	0.709895	0.415691	3.03511	3.05415
280	2009-12-06	-1.24167	75.9583	100.927	0.815456	0.0841646	0.0341899	0.0257791	0.000906946	0.0255621	0.0236156	1.52835	1.36797	0.975542	3.02434	3.0708
281	2009-12-09	-4.79167	90.4583	98.9963	0.610906	0.43134	0.025393	0.0141226	0.00410061	0.0648416	0.00527676	0.511633	0.829103	0.446087	3.40723	3.53801
282	2009-12-12	-7.05417	76.75	101.605	0.68689	0.157876	0.0205818	0.00816416	0	0.00242413	0	0.775682	0.697086	0.503006	3.32727	3.36081
283	2009-12-15	-3.14583	89.7083	100.282	0.534225	0.133771	0.0280203	0.0208305	0	0.0019447	0	1.09177	2.20199	1.05898	3.27649	3.31668
284	2009-12-21	-11.2042	70.5	100.614	0.401289	0.119594	0.138892	0.0116122	0.000813442	0.0351199	0.150245	0.374011	0.229861	0.168768	3.20247
285	2009-12-24	-2.1625	85.7917	102.093	0.788865	0.28046	0.0247075	0.0182331	0	0.0207254	0.0128069	0.181618	0.342826	0.109496	3.24962	3.34707
286	2009-12-27	0.325	96.125	100.056	0.496054	0.102606	0.0120078	0	0	0.0189064	0.0278304	0.825818	0.73609	0.574567	3.35122	3.38093
287	2009-12-30	-14.325	84.875	101.58	0.678519	0.209451	0.0889308	0.0523935	0.00295329	0.0209771	0.115387	0.494157	2.029	0.764378	4.01602
288	2010-01-02	-12.4208	82.7917	100.035	0.170772	0.241209	0.16018	0	0.0170764	0.0134064	0.161183	0.350472	0.283877	0.111388	2.43
289	2010-01-05	-8.05	87.5	99.7571	0.360388	0.194339	0.0375801	0	0	0.00640641	0.0991825	0.178072	0.189377	0.0980489	3.28161	3.2816
290	2010-01-08	-9.725	76.0833	100.257	0.344469	0.0678318	0.11938	0	0.00617635	0.00270641	0.143083	0.294472	0.0348774	0.098436	3.05436	3.23308
291	2010-01-11	-6.25833	81.0833	100.721	0.553731	0.16015	0.0446801	0.0283042	0.00267635	0.0190064	0.0975825	1.24157	4.78088	1.7777	3.2636	3.29165
292	2010-01-14	-5.2875	92.7083	100.825	0.208267	0.152107	0.0989801	0.130204	0.00817635	0.0651064	0.336583	3.44267	12.125	4.57283	2.24012	2.3727
293	2010-01-17	-3.48333	80.9583	100.544	0.555199	0.24058	0.15588	0.0205042	0.00667635	0.0375064	0.189283	2.13597	3.10268	1.63205	3.01909	3.10729
294	2010-01-20	-4.0625	88.5833	100.655	1.03829	0.176113	0.0840801	0.0185042	0.00257635	0.0437064	0.0879825	1.05337	1.71118	0.886662	3.57627	3.64377
295	2010-01-23	-8.72083	72.2917	101.556	0.935012	0.308061	0.29098	0.0525042	0.00667635	0.126706	0.392483	0.581772	1.87818	0.730926	3.57223	3.79796
296	2010-01-26	1.10833	88.2917	98.7042	0.493577	0.0476137	0.0283801	0.0316042	0	0.0335064	0.00548251	1.68827	1.87428	1.2139	2.9536	3.01967
297	2010-01-29	-19.1042	59.5417	101.581	0.205649	0.0693899	0.25348	0.0333042	0.0159764	0.0297064	0.264583	0.540372	0.201977	0.124026	2.77768
298	2010-02-01	-10.6042	68.7083	100.971	0.381977	0.152653	0.11728	0.0321042	0.00367635	0.0291064	0.0498825	0.519172	0.251477	0.210055	3.05664
299	2010-02-04	-9.925	62.1667	101.633	0.4874	0.168019	0.27838	0.0384042	0.00727635	0.0614064	0.259883	0.610672	0.413177	0.279584	3.05682	3.47042
300	2010-02-07	-9.1875	70.25	100.535	0.432088	0.191788	0.25798	0.0238042	0.00367635	0.0413064	0.255383	0.238472	0.131177	0.057894	3.07589	3.85331
301	2010-02-10	-2.725	64.3333	99.3375	0.75121	0.210864	0.14398	0.0211042	0.00197635	0.0664064	0.137883	0.198372	0.246077	0.0716489	2.92553	3.48893
302	2010-02-13	-7.6875	85	99.3592	0.539781	0.134117	0.0302801	0.0243042	0	0.0308064	0	0.608172	0.234577	0.276742	3.33967	3.43384
303	2010-02-16	-3.9375	78.2917	99.1846	0.87585	0.603058	0.17718	0.0578042	0.00407635	0.0621064	0.160983	0.765772	1.50918	0.728849	3.26144	3.41701
304	2010-02-19	-2.15833	72.2083	99.6933	0.490181	0.132416	0.0321801	0.00640417	0.00117635	0.0274064	0.0619825	0.146172	0.00227742	0.0348714	2.69371	2.98081
305	2010-02-22	-4.14583	81.1739	100.504	0.482306	0.110847	0	0.0237042	0.00257635	0.0400064	0.0134825	0.549572	0.926677	0.531204	3.14538	3.21393
306	2010-02-25	0.629167	98.375	99.3754	0.3102	0.304236	0	0.00810417	0.000376351	0.00780641	0	0.204672	0.235077	0.148065	3.33592	3.3773
307	2010-02-28	2.25	81.0833	99.6254	0.237695	0.390591	0	0.0230042	0.00187635	0.0185064	0	0.983872	0.274577	0.44061	2.24583	2.3104
308	2010-03-03	-0.591667	53.0833	100.113	0.794301	0.229203	0.0260801	0.0189042	0.00697635	0.149106	0.0281825	0.266572	0.167677	0.109904	2.63334
309	2010-03-06	0.645833	44.4583	101.096	1.01465	0.235371	0.0210801	0.0296042	0.00837635	0.194406	0.0243825	0.547272	0.296277	0.257442	2.47958
310	2010-03-09	1.00833	47.1667	100.534	0.831522	0.0829786	0.0235801	0.0149042	0.0101764	0.218906	0.0318825	0.222772	0.201177	0.0790489	2.45425
311	2010-03-12	4.28333	53.5417	101.063	1.31168	0.246319	0.0195801	0.0501042	0.0133764	0.206506	0.00968251	1.06127	1.18918	0.6897	2.61589
312	2010-03-15	7.3875	36.4167	100.591	1.13276	0.0581149	0.0841801	0.0175042	0.00777635	0.0980064	0.0457825	0.474072	0.198677	0.207068	2.05876
313	2010-03-18	8.79583	59.0417	99.6038	1.91864	0.0968309	0.0264801	0.00710417	0.0130764	0.186906	0.0226825	1.51347	0.232777	0.614578	2.43092
314	2010-03-21	1.4	64.375	101.156	1.12789	0.116106	0.0347801	0.00620417	0.00447635	0.0551064	0.0219825	0.962272	0.649377	0.549397	2.82037	2.91341
315	2010-03-24	4.25	55.125	100.012	0.777098	0.0591735	0.0321801	0	0.00697635	0.111306	0.0202825	0.769372	0.140577	0.263236	2.22283
316	2010-03-27	-2.5625	43.25	101.686	1.15477	0.0936803	0.0705801	0.0145042	0.0106764	0.0645064	0.0274825	0.917272	0.449077	0.438139	2.67978
317	2010-03-30	5.06667	67.0833	100.527	0.552418	0.0665717	0.0336801	0.0126042	0.00627635	0.0614064	0.0242825	1.68037	0.155777	0.615536	2.15829	2.26383
318	2010-04-02	15.675	60.5833	100.527	1.75418	0.262749	0.0432801	0.0463042	0.0121764	0.107206	0.0139825	3.44167	1.57798	1.57383	2.08598	2.16386
319	2010-04-05	13.2667	51.7917	100.217	1.91941	0.140117	0.0189801	0	0.00667635	0.0722064	0.0149825	1.10467	0.334677	0.500823	2.10819
320	2010-04-08	6.33333	79.9167	99.5733	0.733833	0.0790226	0.0222801	0.0165042	0.00117635	0.0574064	0.00788251	0.597272	0.609877	0.477971	2.6326	2.74707
321	2010-04-11	6.76667	75.2917	101.14	0.714425	0.0305331	0.0159801	0.0142042	0.000776351	0.0506064	0.00548251	0.935872	0.219777	0.466675	2.38548	2.47108
322	2010-04-14	10.0792	42.4167	102.065	1.16795	0.27359	0.0326801	0.0319042	0.0119764	0.217206	0.0210825	0.940172	0.222077	0.387239	1.97382
323	2010-04-17	5.42917	92.0833	99.5308	0.824702	0.0685833	0.0029801	0.00460417	0.000876351	0.108206	0.00598251	0.263772	0.475977	0.203852	3.02007	3.27828
324	2010-04-20	13.2792	46.7917	100.329	1.13705	0.172623	0.0263801	0.0270042	0.0102764	0.210606	0.0106825	0.973872	0.137877	0.390984	1.81248
325	2010-04-23	7.825	46.5	100.402	0.553663	0.129727	0.0245801	0.0207042	0.00967635	0.239806	0.0149825	0.720872	0.0979774	0.224765	1.75187
326	2010-04-26	12.125	46	98.6137	0.738091	0.130283	0.0235801	0.0232042	0.00717635	0.191606	0.0135825	0.739272	0.107277	0.247246	1.6526
327	2010-04-29	9.14167	34.7083	99.7475	0.751005	0.153362	0.10638	0.0505042	0.00967635	0.294406	0.0568825	0.674872	0.0931774	0.183817	1.70409
328	2010-05-02	18.95	75.0417	99.4862	3.29706	0.390374	0.0415801	0.0620042	0.0107764	0.321306	0.0170825	2.05357	0.754877	0.883507	2.3489	2.57336
329	2010-05-05	15.575	66.125	99.7717	2.20368	0.357009	0.0168801	0.0195042	0.00647635	0.202306	0.0101825	1.41517	0.268777	0.618691	2.21019	2.40016
330	2010-05-08	4.95833	87.3333	98.9146	0.617023	0.191878	0.0294801	0.0285042	0.000976351	0.00550641	0.0271825	0.238972	0.149177	0.100046	2.7027	2.8259
331	2010-05-11	9.26667	50	101.7	0.676328	0.0728812	0.0262801	0.0358042	0.00487635	0.0537064	0.0224825	1.02677	0.197877	0.401575	1.83773
332	2010-05-14	12.9917	74.875	100.46	1.69943	0.168701	0.0272801	0.0312042	0.00527635	0.0384064	0.0125825	0.969872	0.547577	0.480797	2.40013	2.48498
333	2010-05-17	16.2875	46.75	101.134	1.5667	0.250979	0.0167801	0.0209042	0.0117764	0.134106	0.0145825	0.561072	0.185177	0.243681	1.79215
334	2010-05-20	19.5958	55.7917	100.308	1.98982	0.330361	0.0176801	0.0281042	0.0159764	0.293906	0.0138825	1.17077	0.189977	0.342636	1.78526
335	2010-05-23	20.35	71.7917	101.136	3.36941	0.401649	0.0407801	0.0840042	0.0176764	0.274906	0.0193825	1.94017	0.547777	0.634878	2.19647	2.42639
336	2010-05-26	26.3417	61.25	100.204	2.41499	0.417225	0.0468801	0.0164042	0.0141764	0.161206	0.0176825	3.04417	0.197277	0.8699	1.5681	1.65614
337	2010-05-29	20.1333	63.0417	100.157	2.18902	0.110795	0.0207801	0.0154042	0.00337635	0.0387064	0.0169825	0.355272	0.193877	0.133388	1.89981	2.10748
338	2010-06-01	20.4917	74.9583	99.6912	2.97617	0.455079	0.0803801	0.0770042	0.00717635	0.0759064	0	1.39777	0.720977	0.630052	2.21804	2.36129
339	2010-06-04	19.1875	67.625	99.8979	2.73631	0.392591	0.0290801	0.0257042	0.00197635	0.0415064	0	0.317072	0.150777	0.125684	2.11284	2.43076
340	2010-06-07	14.0875	60.7917	100.018	1.04177	0.228252	0.0204801	0.0141042	0	0.0167064	0	0.138872	0.0120774	0.0127166	1.85141	2.27718
341	2010-06-10	14.025	88.8333	100.058	1.87193	0.445684	0.0469801	0.0243042	0	0.0214064	0.0124825	0.484172	0.767077	0.404846	2.78453	2.8648
342	2010-06-13	20.5167	66.375	100.328	2.12177	0.916174	0.0503801	0.0381042	0.00237635	0.0517064	0	1.10477	0.107877	0.39653	1.91299	2.01708
[truncated: 509 more rows]

## Sheet: Montreal
item	Date/Time	Temp (°C)	Rel Hum (%)	Stn Press (kPa)	NH3(g)	HNO3(g)	Na(p)	K(p)	Mg(p)	Ca(p)	Cl(p)	SO4(p)	NO3(p)	NH4(p)	pH_EAIM II	pH_EAIM IV	*All chemical compositions have the unit ug/m3
[truncated: 840 more rows]

[truncated: 1 more sheets: St Anicet]
