# Supplementary material for: The sensitivity of PM 2.5 acidity to meteorological parameters and chemical composition changes: 10-year records from six Canadian monitoring sites
Source: Copernicus journal article supplement (doi:10.5194/acp-19-9309-2019), 2019-07-19
Supplement: Supplementary file [file acp-19-9309-2019-supplement-title-page.pdf › acp-19-9309-2019-supplement-title-page.pdf]

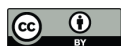

## *Supplement of*

# **The sensitivity of PM<sub>2.5</sub> acidity to meteorological parameters and chemical composition changes: 10-year records from six Canadian monitoring sites**

**Ye Tao and Jennifer G. Murphy**

*Correspondence to:* Jennifer G. Murphy ([jmurphy@chem.utoronto.ca](mailto:jmurphy@chem.utoronto.ca))

- [acp-19-9309-2019-supplement-title-page.pdf](#)
- pH Canada paper supplementary
  - [Supplement pH time series and composition profile data.xlsx](#)
  - [pH sensitivity eastern Canada\\_supplementary information.pdf](#)

The copyright of individual parts of the supplement might differ from the CC BY 4.0 License.
